# Supplementary material for: Machine learning-guided search for high-efficiency perovskite solar cells with doped electron transport layers
Source: Royal Society of Chemistry journal article supplement (doi:10.1039/d1ta08194b), 2021-01-01
Supplement: d1ta08194b1.pdf [file d1ta08194b1.pdf]

## Supporting Information

### **Machine learning-guided search for high-efficiency perovskite solar cells with doped electron transport layers**

*Chenlong She<sup>&a</sup>, Qicheng Huang<sup>&a</sup>, Cong Chen<sup>a,b</sup>, Yue Jiang<sup>a</sup>, Zhen Fan<sup>\*a</sup>, Jinwei Gao<sup>\*a</sup>*

<sup>a</sup> Institute for Advanced Materials, South China Academy of Advanced Optoelectronics, and Guangdong Provincial Key Laboratory of Optical Information Materials and Technology, South China Normal University, Guangzhou 510006, China.

<sup>b</sup> Department of Mechanical Engineering, The University of Hong Kong, Pokfulam Rd., Pokfulam, Hong Kong, China.

## **S1 Datasets used in this work**

By surveying 880 articles published between 2013 and 2020, 2006 experimental data points were extracted from these articles and used to construct the datasets.

The first dataset used for the first-step ML was composed of 1820 PSCs performance data points extracted from 795 articles published in 2013-2020. As the key performance metric of a PSC, PCE was chosen as target attribute. Nine major factors influencing the PCE were chosen as features, which were perovskite type, ETL and second layer of ETL/ETL interlayer (ETL-2) materials, deposition procedure and method, perovskite precursor solvent, anti-solvent, HTL materials and additive. The details of the original dataset are given in **Table S1**. In the calculation, in order to avoid the over-fitting and improve the model performance, we simplified the dataset by reducing the number of variables, i.e., variables that appear less than or equal to 5 times in each feature were classified into “other” (See **Table S2** for details).

The second dataset used for the second-step ML containing PSCs with doped ETLs. This dataset contains 90 data points of doped-SnO<sub>2</sub>-based PSCs collected from 36 articles and 96 data points of doped-TiO<sub>2</sub>-based PSCs collected from 49 articles. We took the efficiency improvement ratio (EIR) as the target attribute. An EIR induced by the ETL doping was obtained by dividing the PCE of a doped-ETL-based PSC by that of the corresponding undoped-ETL-based PSC. We set the doping element and concentration, the physical and chemical properties of the doping element such as atomic number (AN), ionic radius (IR/[pm]), ionic charge (IC), ionization energy (IE/[kJ·mol<sup>-1</sup>]), electron

affinity ( $EA/[kJ\cdot mol^{-1}]$ ), electronegativity (Paulingscales), electron numbers of s, p, d, f orbits (S/P/D/F orbit) and sum of s and p orbital radii (SP orbit/[pm]), and the optical and electrical properties of ETL after doping like Fermi level, CBM, bandgap and conductivity as the features (See **Tables S3-S5** for details). These data were obtained from the website <https://www.webelements.com/>. **Figure S1** shows all the doping elements for the  $TiO_2$  and  $SnO_2$  ETLs.

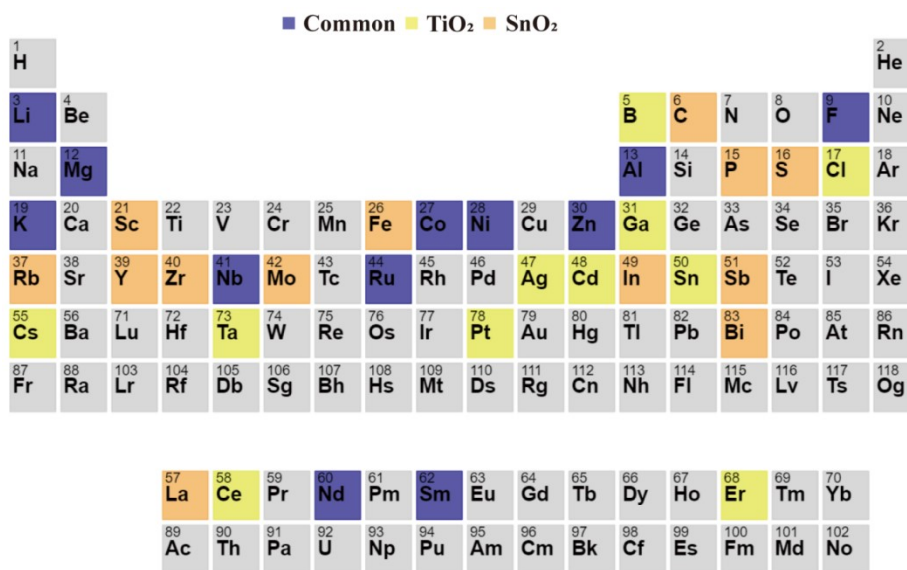

**Figure S1.** Doping elements used for the  $TiO_2$  and  $SnO_2$  ETLs. Some elements are doped only in  $SnO_2$  or  $TiO_2$ , while some other elements are doped in both.

**Table S1.** First-step ML dataset containing undoped-ETL-based PSCs.

| Article                                                 | Year | ETL              | ETL-2                           | Perovskite                           | Deposition procedure | Deposition method | Anti-solvent treatment | Precursor solution | HTL          | HTL additive | PCE/[%] |
|---------------------------------------------------------|------|------------------|---------------------------------|--------------------------------------|----------------------|-------------------|------------------------|--------------------|--------------|--------------|---------|
| Abrusci, A. et al., Nano Lett. 13, 3124–3128 (2013)     | 2013 | TiO <sub>2</sub> | mTiO <sub>2</sub>               | MAPbI <sub>3</sub> -xCl <sub>x</sub> | one-step             | spin              | no                     | DMF                | PCPDTBT      | no           | 6.8     |
| Abrusci, A. et al., Nano Lett. 13, 3124–3128 (2013)     | 2013 | TiO <sub>2</sub> | mTiO <sub>2</sub>               | MAPbI <sub>3</sub> -xCl <sub>x</sub> | one-step             | spin              | no                     | DMF                | P3HT         | no           | 6.7     |
| Abrusci, A. et al., Nano Lett. 13, 3124–3128 (2013)     | 2013 | TiO <sub>2</sub> | mTiO <sub>2</sub>               | MAPbI <sub>3</sub> -xCl <sub>x</sub> | one-step             | spin              | no                     | DMF                | P3HT         | no           | 3.8     |
| Abrusci, A. et al., Nano Lett. 13, 3124–3128 (2013)     | 2013 | TiO <sub>2</sub> | mAl <sub>2</sub> O <sub>3</sub> | MAPbI <sub>3</sub> -xCl <sub>x</sub> | one-step             | spin              | no                     | DMF                | spiro-OMeTAD | Li+TBP       | 11.8    |
| Abrusci, A. et al., Nano Lett. 13, 3124–3128 (2013)     | 2013 | TiO <sub>2</sub> | mTiO <sub>2</sub>               | MAPbI <sub>3</sub> -xCl <sub>x</sub> | one-step             | spin              | no                     | DMF                | spiro-OMeTAD | Li+TBP       | 11.7    |
| Abrusci, A. et al., Nano Lett. 13, 3124–3128 (2013)     | 2013 | TiO <sub>2</sub> | mTiO <sub>2</sub>               | MAPbI <sub>3</sub> -xCl <sub>x</sub> | one-step             | spin              | no                     | DMF                | spiro-OMeTAD | Li+TBP       | 10.2    |
| Ball, J. M. et al., Energy Environ. Sci. 6, 1739 (2013) | 2013 | TiO <sub>2</sub> | mAl <sub>2</sub> O <sub>3</sub> | MAPbI <sub>3</sub> -xCl <sub>x</sub> | one-step             | spin              | no                     | DMF                | spiro-OMeTAD | Li+TBP       | 12.3    |
| Bi, D. et al., J. Phys. Chem. Lett. 4, 1532–1536 (2013) | 2013 | TiO <sub>2</sub> | mTiO <sub>2</sub>               | MAPbI <sub>3</sub>                   | one-step             | spin              | no                     | GBL                | DEH          | Li+TBP       | 1.6     |
| Bi, D. et al., J. Phys. Chem. Lett. 4, 1532–1536 (2013) | 2013 | TiO <sub>2</sub> | mTiO <sub>2</sub>               | MAPbI <sub>3</sub>                   | one-step             | spin              | no                     | GBL                | P3HT         | Li+TBP       | 4.5     |

|                                                         |      |                  |                   |                                      |          |          |    |     |              |        |     |
|---------------------------------------------------------|------|------------------|-------------------|--------------------------------------|----------|----------|----|-----|--------------|--------|-----|
| Bi, D. et al., J. Phys. Chem. Lett. 4, 1532–1536 (2013) | 2013 | TiO <sub>2</sub> | mTiO <sub>2</sub> | MAPbI <sub>3</sub>                   | one-step | spin     | no | GBL | spiro-OMeTAD | Li+TBP | 8.5 |
| Bi, D. et al., Nanoscale 5, 11686 (2013)                | 2013 | ZnO              | ZnO-nanorod       | MAPbI <sub>3</sub>                   | one-step | spin     | no | GBL | spiro-OMeTAD | Li+TBP | 5   |
| Burschka, J. et al., Nature 499, 316–319 (2013)         | 2013 | TiO <sub>2</sub> | mTiO <sub>2</sub> | MAPbI <sub>3</sub>                   | two-step | spin-dip | no | DMF | spiro-OMeTAD | Li+TBP | 15  |
| Cai, B. et al., Energy Environ. Sci. 6, 1480 (2013)     | 2013 | TiO <sub>2</sub> | mTiO <sub>2</sub> | MAPbI <sub>3</sub>                   | one-step | spin     | no | DMF | PCBDTPP      | no     | 5.6 |
| Cai, B. et al., Energy Environ. Sci. 6, 1480 (2013)     | 2013 | TiO <sub>2</sub> | mTiO <sub>2</sub> | MAPbBr <sub>3</sub>                  | one-step | spin     | no | GBL | PCBDTPP      | no     | 3   |
| Cai, B. et al., Energy Environ. Sci. 6, 1480 (2013)     | 2013 | TiO <sub>2</sub> | mTiO <sub>2</sub> | MAPbBr <sub>3</sub>                  | one-step | spin     | no | GBL | P3HT         | no     | 0.8 |
| Chen, H. et al., Chem. Commun. 49, 7277 (2013)          | 2013 | TiO <sub>2</sub> | mTiO <sub>2</sub> | MAPbI <sub>3</sub>                   | one-step | spin     | no | GBL | P3HT         | Li+TBP | 6.5 |
| Chen, H. et al., Chem. Commun. 49, 7277 (2013)          | 2013 | TiO <sub>2</sub> | mTiO <sub>2</sub> | MAPbI <sub>3</sub>                   | one-step | spin     | no | GBL | P3HT         | Li+TBP | 4.1 |
| Colella, S. et al., Chem. Mater. 25, 4613–4618 (2013)   | 2013 | TiO <sub>2</sub> | 0                 | MAPbI <sub>3</sub> -xCl <sub>x</sub> | one-step | spin     | no | DMF | spiro-OMeTAD | Li+TBP | 7.4 |
| Colella, S. et al., Chem. Mater. 25, 4613–4618 (2013)   | 2013 | TiO <sub>2</sub> | 0                 | MAPbI <sub>3</sub>                   | one-step | spin     | no | GBL | spiro-OMeTAD | Li+TBP | 4.8 |
| Dharani, S. et al., Nanoscale 6, 1675–1679 (2014)       | 2013 | TiO <sub>2</sub> | 0                 | MAPbI <sub>3</sub>                   | two-step | spin-dip | no | DMF | spiro-OMeTAD | Li+TBP | 3.1 |

|                                                                |      |      |        |         |          |          |    |     |              |        |     |
|----------------------------------------------------------------|------|------|--------|---------|----------|----------|----|-----|--------------|--------|-----|
| Dharani, S. et al., <i>Nanoscale</i> 6, 1675–1679 (2014)       | 2013 | TiO2 | TiO2   | MAPbI3  | two-step | spin-dip | no | DMF | spiro-OMeTAD | Li+TBP | 9.8 |
| Edri, E. et al., <i>J. Phys. Chem. Lett.</i> 4, 897–902 (2013) | 2013 | TiO2 | mAl2O3 | MAPbBr3 | one-step | spin     | no | DMF | PCBM         | no     | 0.7 |
| Edri, E. et al., <i>J. Phys. Chem. Lett.</i> 4, 897–902 (2013) | 2013 | TiO2 | mAl2O3 | MAPbBr3 | one-step | spin     | no | DMF | TPD          | no     | 0.7 |
| Edri, E. et al., <i>J. Phys. Chem. Lett.</i> 4, 897–902 (2013) | 2013 | TiO2 | mAl2O3 | MAPbBr3 | one-step | spin     | no | DMF | PDI          | no     | 0.6 |
| Edri, E. et al., <i>J. Phys. Chem. Lett.</i> 4, 897–902 (2013) | 2013 | TiO2 | mTiO2  | MAPbBr3 | one-step | spin     | no | DMF | PDI          | no     | 0.5 |
| Edri, E. et al., <i>J. Phys. Chem. Lett.</i> 4, 897–902 (2013) | 2013 | TiO2 | mAl2O3 | MAPbBr3 | one-step | spin     | no | DMF | P3HT         | no     | 0.5 |
| Heo, J. H. et al., <i>Nat. Photonics</i> 7, 486–491 (2013)     | 2013 | TiO2 | mTiO2  | MAPbI3  | one-step | spin 2-3 | no | GBL | no           | no     | 2.5 |
| Heo, J. H. et al., <i>Nat. Photonics</i> 7, 486–491 (2013)     | 2013 | TiO2 | mTiO2  | MAPbI3  | one-step | spin 2-3 | no | GBL | PCPDTBT      | no     | 5.3 |
| Heo, J. H. et al., <i>Nat. Photonics</i> 7, 486–491 (2013)     | 2013 | TiO2 | mTiO2  | MAPbI3  | one-step | spin 2-3 | no | GBL | PCDTBT       | no     | 4.2 |
| Heo, J. H. et al., <i>Nat. Photonics</i> 7, 486–491 (2013)     | 2013 | TiO2 | mTiO2  | MAPbI3  | one-step | spin 2-3 | no | GBL | PTAA         | no     | 12  |
| Heo, J. H. et al., <i>Nat. Photonics</i> 7, 486–491 (2013)     | 2013 | TiO2 | mTiO2  | MAPbI3  | one-step | spin 2-3 | no | GBL | P3HT         | Li+TBP | 6.7 |

|                                                                 |      |      |             |        |          |          |    |     |              |                  |      |
|-----------------------------------------------------------------|------|------|-------------|--------|----------|----------|----|-----|--------------|------------------|------|
| Heo, J. H. et al., Nat. Photonics 7, 486–491 (2013)             | 2013 | TiO2 | mTiO2       | MAPbI3 | one-step | spin 2-3 | no | GBL | spiro-OMeTAD | Li+TBP           | 8.4  |
| Jeon, N. J. et al., J. Am. Chem. Soc. 135, 19087–19090 (2013)   | 2013 | TiO2 | mTiO2       | MAPbI3 | one-step | spin 2-3 | no | GBL | no           | no               | 8    |
| Jeon, N. J. et al., J. Am. Chem. Soc. 135, 19087–19090 (2013)   | 2013 | TiO2 | mTiO2       | MAPbI3 | one-step | spin 2-3 | no | GBL | Py-C         | Li+TBP+FK<br>269 | 12.4 |
| Jeon, N. J. et al., J. Am. Chem. Soc. 135, 19087–19090 (2013)   | 2013 | TiO2 | mTiO2       | MAPbI3 | one-step | spin 2-3 | no | GBL | spiro-OMeTAD | Li+TBP+FK<br>269 | 12.7 |
| Shi, J. J. et al., Chinese Phys. Lett. 30, 128402 (2013)        | 2013 | TiO2 | mTiO2       | MAPbI3 | one-step | spin     | no | GBL | no           | no               | 5.1  |
| Shi, J. J. et al., Chinese Phys. Lett. 30, 128402 (2013)        | 2013 | TiO2 | mTiO2       | MAPbI3 | one-step | spin     | no | GBL | no           | no               | 3.3  |
| Kim, H. S. et al., Nano Lett. 13, 2412–2417 (2013)              | 2013 | TiO2 | TiO2        | MAPbI3 | one-step | spin     | no | GBL | spiro-OMeTAD | Li+TBP           | 9.4  |
| Kumar, M. H. et al., Chem. Commun. 49, 11089 (2013)             | 2013 | ZnO  | 0           | MAPbI3 | two-step | spin-dip | no | DMF | spiro-OMeTAD | Li+TBP+FK<br>102 | 5.5  |
| Kumar, M. H. et al., Chem. Commun. 49, 11089 (2013)             | 2013 | ZnO  | ZnO-nanorod | MAPbI3 | two-step | spin-dip | no | DMF | spiro-OMeTAD | Li+TBP+FK<br>102 | 8.9  |
| Laban, W. A. and Etgar, L., Energy Environ. Sci. 6, 3249 (2013) | 2013 | TiO2 | mTiO2       | MAPbI3 | one-step | spin 2-3 | no | GBL | no           | no               | 8    |
| Bi, D. et al., RSC Adv. 3, 18762 (2013)                         | 2013 | TiO2 | mTiO2       | MAPbI3 | two-step | spin-dip | no | DMF | spiro-OMeTAD | Li+TBP           | 9.5  |

|                                                            |      |      |         |             |          |          |    |         |              |               |      |
|------------------------------------------------------------|------|------|---------|-------------|----------|----------|----|---------|--------------|---------------|------|
| Bi, D. et al., RSC Adv. 3, 18762 (2013)                    | 2013 | TiO2 | mZrO2   | MAPbI3      | two-step | spin-dip | no | DMF     | spiro-OMeTAD | Li+TBP        | 10.8 |
| Liu, M. et al., Nature 501, 395–398 (2013)                 | 2013 | TiO2 | 0       | MAPbI3-xClx | one-step | CVD      | no | na      | spiro-OMeTAD | Li+TBP        | 15.4 |
| Liu, M. et al., Nature 501, 395–398 (2013)                 | 2013 | TiO2 | 0       | MAPbI3-xClx | one-step | spin     | no | na      | spiro-OMeTAD | Li+TBP        | 8.6  |
| Liu, D. and Kelly, T. L., Nat. Photonics 8, 133–138 (2013) | 2013 | ZnO  | 0       | MAPbI3      | two-step | spin-dip | no | DMF     | spiro-OMeTAD | Li+TBP        | 15.7 |
| Noh, J. H. et al., Nano Lett. 13, 1764–1769 (2013)         | 2013 | TiO2 | mTiO2   | MAPbI3-xBrx | one-step | spin 2-3 | no | DMF+GBL | PTAA         | Li+TBP        | 12.3 |
| Noh, J. H. et al., J. Mater. Chem. A 1, 11842 (2013)       | 2013 | TiO2 | mTiO2   | MAPbI3      | one-step | spin 2-3 | no | GBL     | spiro-OMeTAD | Li+TBP+FK 209 | 10.4 |
| Qiu, J. et al., Nanoscale 5, 3245 (2013)                   | 2013 | TiO2 | TiO2    | MAPbI3      | one-step | spin     | no | DMF     | spiro-OMeTAD | Li+TBP        | 4.3  |
| Qiu, J. et al., Nanoscale 5, 3245 (2013)                   | 2013 | TiO2 | TiO2    | MAPbI2Br    | one-step | spin     | no | DMF     | spiro-OMeTAD | Li+TBP        | 4.9  |
| Zhang, W. et al., Nano Lett. 13, 4505–4510 (2013)          | 2013 | TiO2 | mAl2O3  | MAPbI3-xClx | one-step | spin     | no | DMF     | spiro-OMeTAD | Li+TBP        | 10.7 |
| Zhang, W. et al., Nano Lett. 13, 4505–4510 (2013)          | 2013 | TiO2 | Au@SiO2 | MAPbI3-xClx | one-step | spin     | no | DMF     | spiro-OMeTAD | Li+TBP        | 11.4 |
| Abate, A. et al., Nano Lett. 14, 3247–3254-2014            | 2014 | TiO2 | mAl2O3  | MAPbI3-xClx | one-step | spin     | no | DMF     | spiro-OMeTAD | Li+TBP        | 15.7 |



|                                                                   |      |      |        |             |          |          |    |     |              |           |      |
|-------------------------------------------------------------------|------|------|--------|-------------|----------|----------|----|-----|--------------|-----------|------|
| Abate, A. et al., Nano Lett. 14, 3247–3254 (2014)                 | 2014 | TiO2 | mAl2O3 | MAPbI3-xClx | one-step | spin     | no | DMF | spiro-OMeTAD | Li+TBP    | 13   |
| Abate, A. et al., Nano Lett. 14, 3247–3254 (2014)                 | 2014 | TiO2 | mTiO2  | MAPbI3-xClx | one-step | spin     | no | DMF | spiro-OMeTAD | Li+TBP    | 6.1  |
| Abate, A. et al., Nano Lett. 14, 3247–3254 (2014)                 | 2014 | TiO2 | mTiO2  | MAPbI3-xClx | one-step | spin     | no | DMF | spiro-OMeTAD | Li+TBP    | 3.8  |
| Aharon, S. et al., Phys. Chem. Chem. Phys. 16, 10512–10518 (2014) | 2014 | TiO2 | mTiO2  | MAPbI3      | two-step | spin-dip | no | na  | no           | no        | 10.9 |
| Aharon, S. et al., J. Phys. Chem. C 118, 17160–17165 (2014)       | 2014 | TiO2 | mTiO2  | MAPbBr3     | two-step | spin-dip | no | DMF | no           | no        | 1.7  |
| Aharon, S. et al., J. Phys. Chem. C 118, 17160–17165 (2014)       | 2014 | TiO2 | mTiO2  | MAPbI3      | two-step | spin-dip | no | DMF | no           | no        | 7.2  |
| Aharon, S. et al., J. Phys. Chem. C 118, 17160–17165 (2014)       | 2014 | TiO2 | mTiO2  | MAPbI3-xBrx | two-step | spin-dip | no | DMF | no           | no        | 8.5  |
| Badia, L. et al., APL Mater. 2, 081507 (2014)                     | 2014 | TiO2 | 0      | MAPbI3-xClx | one-step | spin     | no | DMF | spiro-OMeTAD | Li+TBP    | 9.2  |
| Badia, L. et al., APL Mater. 2, 081507 (2014)                     | 2014 | TiO2 | 0      | MAPbI3-xClx | one-step | spin     | no | DMF | spiro-OMeTAD | Li+TBP+Ir | 10.8 |
| Bera, A. et al., J. Phys. Chem. C 118, 28494–28501 (2014)         | 2014 | TiO2 | mTiO2  | MAPbI3-xClx | one-step | spin     | no | DMF | spiro-OMeTAD | Li+TBP    | 7.8  |
| Bera, A. et al., J. Phys. Chem. C 118, 28494–28501 (2014)         | 2014 | TiO2 | Msto   | MAPbI3-xClx | one-step | spin     | no | DMF | spiro-OMeTAD | Li+TBP    | 7.6  |

|                                                             |      |      |       |             |          |          |    |     |              |                  |      |
|-------------------------------------------------------------|------|------|-------|-------------|----------|----------|----|-----|--------------|------------------|------|
| Chandiran, A. K. et al., Adv. Mater. 26, 4309–4312 (2014)   | 2014 | 0    | mTiO2 | MAPbI3      | two-step | spin-dip | no | DMF | spiro-OMeTAD | Li+TBP           | 11.5 |
| Chandiran, A. K. et al., Adv. Mater. 26, 4309–4312 (2014)   | 2014 | 0    | mTiO2 | MAPbI3      | two-step | spin-dip | no | DMF | spiro-OMeTAD | Li+TBP           | 7.2  |
| Chavhan, S. et al., J. Mater. Chem. A 2, 12754–12760 (2014) | 2014 | TiO2 | 0     | MAPbI3-xClx | one-step | spin 2-3 | no | DMF | CuSCN        | no               | 6.4  |
| Chen, Q. et al., Nano Lett. 14, 4158–4163 (2014)            | 2014 | TiO2 | 0     | MAPbI3      | two-step | vasp     | no | DMF | spiro-OMeTAD | Li+TBP           | 12   |
| Chen, Q. et al., J. Am. Chem. Soc. 136, 622–625 (2014)      | 2014 | TiO2 | 0     | MAPbI3      | two-step | vasp     | no | DMF | spiro-OMeTAD | Li+TBP           | 12.1 |
| Choi, H. et al., Chem. - A Eur. J. 20, 10894–10899 (2014)   | 2014 | TiO2 | mTiO2 | MAPbI3      | two-step | spin-dip | no | DMF | no           | no               | 6.9  |
| Choi, H. et al., Chem. - A Eur. J. 20, 10894–10899 (2014)   | 2014 | TiO2 | mTiO2 | MAPbI3      | two-step | spin-dip | no | DMF | OMeTPA-FA    | no               | 11.1 |
| Choi, H. et al., Chem. - A Eur. J. 20, 10894–10899 (2014)   | 2014 | TiO2 | mTiO2 | MAPbI3      | two-step | spin-dip | no | DMF | OMeTPA-FA    | Li+TBP           | 12.4 |
| Choi, H. et al., Chem. - A Eur. J. 20, 10894–10899 (2014)   | 2014 | TiO2 | mTiO2 | MAPbI3      | two-step | spin-dip | no | DMF | OMeTPA-TPA   | Li+TBP           | 11   |
| Choi, H. et al., Chem. - A Eur. J. 20, 10894–10899 (2014)   | 2014 | TiO2 | mTiO2 | MAPbI3      | two-step | spin-dip | no | DMF | OMeTPA-FA    | Li+TBP+FK<br>209 | 13.6 |
| Choi, H. et al., Chem. - A Eur. J. 20, 10894–10899 (2014)   | 2014 | TiO2 | mTiO2 | MAPbI3      | two-step | spin-dip | no | DMF | OMeTPA-TPA   | Li+TBP+FK<br>209 | 12.3 |

|                                                                 |      |      |       |             |          |          |    |         |                    |                  |      |
|-----------------------------------------------------------------|------|------|-------|-------------|----------|----------|----|---------|--------------------|------------------|------|
| Choi, H. et al., Chem. - A Eur. J. 20, 10894–10899 (2014)       | 2014 | TiO2 | mTiO2 | MAPbI3      | two-step | spin-dip | no | DMF     | spiro-OMeTAD       | Li+TBP+FK<br>209 | 14.7 |
| Christians, J. A. et al., J. Am. Chem. Soc. 136, 758–764 (2014) | 2014 | TiO2 | mTiO2 | MAPbI3      | one-step | spin     | no | GBL     | spiro-OMeTAD       | Li+TBP           | 7.9  |
| Christians, J. A. et al., J. Am. Chem. Soc. 136, 758–764 (2014) | 2014 | TiO2 | mTiO2 | MAPbI3      | one-step | spin     | no | GBL     | CuI                | no               | 6    |
| Colella, S. et al., J. Phys. Chem. Lett. 5, 3532–3538 (2014)    | 2014 | TiO2 | 0     | MAPbI3-xClx | one-step | spin     | no | DMF     | spiro-OMeTAD       | Li+TBP           | 9.2  |
| Conings, B. et al., APL Mater. 2, 081505 (2014)                 | 2014 | TiO2 | 0     | MAPbI3-xClx | one-step | spin     | no | DMSO    | P3HT               | no               | 13.6 |
| Conings, B. et al., Adv. Mater. 26, 2041–2046 (2014)            | 2014 | TiO2 | 0     | MAPbI2Cl    | one-step | spin     | no | DMF     | P3HT               | no               | 11.4 |
| Ding, Y. et al., J. Power Sources 272, Ahead of Print (2014)    | 2014 | TiO2 | mTiO2 | MAPbI3-xClx | one-step | spin     | no | DMF     | spiro-OMeTAD       | Li+TBP           | 4.5  |
| Ding, Y. et al., J. Power Sources 272, Ahead of Print (2014)    | 2014 | TiO2 | mTiO2 | MAPbI3-xClx | one-step | spin     | no | DMF+PVP | spiro-OMeTAD       | Li+TBP           | 8.7  |
| Do, K. et al., Chem. Commun. 50, 10971–10974 (2014)             | 2014 | TiO2 | mTiO2 | MAPbI3      | two-step | spin-dip | no | DMF     | Triazine-Th-OMeTPA | Li+TBP+FK<br>102 | 12.5 |
| Do, K. et al., Chem. Commun. 50, 10971–10974 (2014)             | 2014 | TiO2 | mTiO2 | MAPbI3      | two-step | spin-dip | no | DMF     | Triazine-Ph-OMeTPA | Li+TBP+FK<br>102 | 10.9 |
| Do, K. et al., Chem. Commun. 50, 10971–10974 (2014)             | 2014 | TiO2 | mTiO2 | MAPbI3      | two-step | spin-dip | no | DMF     | spiro-OMeTAD       | Li+TBP+FK<br>102 | 13.5 |

|                                                             |      |      |        |              |          |          |    |     |              |          |      |
|-------------------------------------------------------------|------|------|--------|--------------|----------|----------|----|-----|--------------|----------|------|
| Edri, E. et al., J. Phys. Chem. Lett. 5, 429–433 (2014)     | 2014 | TiO2 | mAl2O3 | MAPbBr3      | one-step | spin 2-3 | no | DMF | CBP          | Li+TBP   | 0.4  |
| Edri, E. et al., J. Phys. Chem. Lett. 5, 429–433 (2014)     | 2014 | TiO2 | mAl2O3 | MAPbBr3-xClx | one-step | spin 2-3 | no | DMF | CBP          | Li+TBP   | 2.7  |
| Edri, E. et al., J. Phys. Chem. Lett. 5, 429–433 (2014)     | 2014 | TiO2 | mAl2O3 | MAPbBr3-xClx | one-step | spin 2-3 | no | DMF | CBP          | TBP      | 0.4  |
| Eperon, G. E. et al., Energy Environ. Sci. 7, 982 (2014)    | 2014 | TiO2 | 0      | FAPbI3       | one-step | spin     | no | DMF | spiro-OMeTAD | Li+TBP   | 14.2 |
| Etgar, L. et al., J. Mater. Chem. A 2, 11586–11590 (2014)   | 2014 | TiO2 | mTiO2  | MAPbI3       | one-step | spin     | no | GBL | no           | no       | 3    |
| Etgar, L. et al., J. Mater. Chem. A 2, 11586–11590 (2014)   | 2014 | TiO2 | mTiO2  | MAPbI3       | one-step | spin     | no | GBL | PbS QDs      | no       | 3.6  |
| Di Giacomo, F. et al., J. Power Sources 251, 152–156 (2014) | 2014 | TiO2 | mTiO2  | MAPbI3-xClx  | one-step | spin     | no | DMF | P3HT         | Li+TBP   | 9.3  |
| Di Giacomo, F. et al., J. Power Sources 251, 152–156 (2014) | 2014 | TiO2 | mTiO2  | MAPbI3-xClx  | one-step | spin     | no | DMF | spiro-OMeTAD | Li+TBP   | 8.6  |
| Guo, Y. et al., J. Mater. Chem. A 2, 13827–13830 (2014)     | 2014 | TiO2 | 0      | MAPbI3-xClx  | one-step | spin     | no | DMF | P3HT         | no       | 9.2  |
| Guo, Y. et al., J. Mater. Chem. A 2, 13827–13830 (2014)     | 2014 | TiO2 | 0      | MAPbI3-xClx  | one-step | spin     | no | DMF | P3HT         | Li       | 11.2 |
| Guo, Y. et al., J. Mater. Chem. A 2, 13827–13830 (2014)     | 2014 | TiO2 | 0      | MAPbI3-xClx  | one-step | spin     | no | DMF | P3HT         | Li+D-TBP | 12.4 |

|                                                                 |      |      |       |                  |          |          |    |     |              |                |     |
|-----------------------------------------------------------------|------|------|-------|------------------|----------|----------|----|-----|--------------|----------------|-----|
| Guo, Y. et al., J. Mater. Chem. A 2, 13827–13830 (2014)         | 2014 | TiO2 | 0     | MAPbI3-xClx      | one-step | spin     | no | DMF | P3HT         | D-TBP          | 9.1 |
| Hanusch, F. C. et al., J. Phys. Chem. Lett. 5, 2791–2795 (2014) | 2014 | TiO2 | 0     | MAPbBr3          | two-step | spin-dip | no | DMF | spiro-OMeTAD | Li+TBP         | 0.4 |
| Hanusch, F. C. et al., J. Phys. Chem. Lett. 5, 2791–2795 (2014) | 2014 | TiO2 | 0     | FAPbBr3          | two-step | spin-dip | no | DMF | spiro-OMeTAD | Li+TBP         | 6.5 |
| Hao, F. et al., Nat. Photonics 8, 489–494 (2014)                | 2014 | TiO2 | mTiO2 | MASnI2Br         | one-step | spin     | no | DMF | spiro-OMeTAD | Li+2,6lutidine | 6   |
| Hao, F. et al., Nat. Photonics 8, 489–494 (2014)                | 2014 | TiO2 | mTiO2 | MASnI2Br         | one-step | spin     | no | DMF | spiro-OMeTAD | Li+2,6lutidine | 5.6 |
| Hao, F. et al., Nat. Photonics 8, 489–494 (2014)                | 2014 | TiO2 | mTiO2 | MASnI3           | one-step | spin     | no | DMF | spiro-OMeTAD | Li+2,6lutidine | 5.4 |
| Hao, F. et al., Nat. Photonics 8, 489–494 (2014)                | 2014 | TiO2 | mTiO2 | MASnBr3          | one-step | spin     | no | DMF | spiro-OMeTAD | Li+2,6lutidine | 4.5 |
| Hao, F. et al., J. Am. Chem. Soc. 136, 8094–8099 (2014)         | 2014 | TiO2 | mTiO2 | MAPbI3           | one-step | spin     | no | DMF | spiro-OMeTAD | Li+2,6lutidine | 8.3 |
| Hao, F. et al., J. Am. Chem. Soc. 136, 8094–8099 (2014)         | 2014 | TiO2 | mTiO2 | MASn0.25Pb0.75I3 | one-step | spin     | no | DMF | spiro-OMeTAD | Li+2,6lutidine | 7.4 |
| Hao, F. et al., J. Am. Chem. Soc. 136, 8094–8099 (2014)         | 2014 | TiO2 | mTiO2 | MASn0.5Pb0.5I3   | one-step | spin     | no | DMF | spiro-OMeTAD | Li+2,6lutidine | 7.3 |
| Hao, F. et al., J. Am. Chem. Soc. 136, 8094–8099 (2014)         | 2014 | TiO2 | mTiO2 | MASn0.75Pb0.25I3 | one-step | spin     | no | DMF | spiro-OMeTAD | Li+2,6lutidine | 3.7 |

|                                                           |      |        |       |        |          |          |    |     |              |                |      |
|-----------------------------------------------------------|------|--------|-------|--------|----------|----------|----|-----|--------------|----------------|------|
| Hao, F. et al., J. Am. Chem. Soc. 136, 8094–8099 (2014)   | 2014 | TiO2   | mTiO2 | MASnI3 | one-step | spin     | no | DMF | spiro-OMeTAD | Li+2,6lutidine | 5.4  |
| Hao, F. et al., J. Am. Chem. Soc. 136, 16411–16419 (2014) | 2014 | TiO2   | mTiO2 | MAPbI3 | one-step | spin     | no | DMF | no           | no             | 6.4  |
| Hao, F. et al., J. Am. Chem. Soc. 136, 16411–16419 (2014) | 2014 | TiO2   | mTiO2 | MAPbI3 | two-step | vasp     | no | DMF | no           | no             | 10.6 |
| Hu, Q. et al., ACS Nano 8, 10161–10167 (2014)             | 2014 | TiO2   | 0     | MAPbI3 | two-step | spin-dip | no | DMF | spiro-OMeTAD | Li+TBP         | 14.2 |
| Hu, Q. et al., ACS Nano 8, 10161–10167 (2014)             | 2014 | ZnO    | 0     | MAPbI3 | two-step | spin-dip | no | DMF | spiro-OMeTAD | Li+TBP         | 13.6 |
| Hu, Q. et al., ACS Nano 8, 10161–10167 (2014)             | 2014 | Cs2CO3 | 0     | MAPbI3 | two-step | spin-dip | no | DMF | spiro-OMeTAD | Li+TBP         | 15.1 |
| Huang, F. et al., Nano Energy 10, 10–18 (2014)            | 2014 | TiO2   | 0     | MAPbI3 | one-step | spin     | no | DMF | spiro-OMeTAD | Li+TBP         | 17   |
| Huang, F. et al., Nano Energy 10, 10–18 (2014)            | 2014 | TiO2   | 0     | MAPbI3 | one-step | spin     | no | DMF | spiro-OMeTAD | Li+TBP         | 5.7  |
| Huang, F. et al., Nano Energy 10, 10–18 (2014)            | 2014 | TiO2   | 0     | MAPbI3 | one-step | spin     | no | DMF | spiro-OMeTAD | Li+TBP         | 13.4 |
| Huang, F. et al., Nano Energy 10, 10–18 (2014)            | 2014 | TiO2   | 0     | MAPbI3 | one-step | spin     | no | DMF | spiro-OMeTAD | Li+TBP         | 8.6  |
| Huang, F. et al., Nano Energy 10, 10–18 (2014)            | 2014 | TiO2   | 0     | MAPbI3 | one-step | spin     | no | DMF | spiro-OMeTAD | Li+TBP         | 4.3  |

|                                                             |      |      |       |             |          |          |         |          |              |        |      |
|-------------------------------------------------------------|------|------|-------|-------------|----------|----------|---------|----------|--------------|--------|------|
| Ito, S. et al., ChemPhysChem 15, 1194–1200 (2014)           | 2014 | TiO2 | mTiO2 | MAPbI3      | one-step | spin     | no      | GBL      | no           | no     | 1.4  |
| Ito, S. et al., ChemPhysChem 15, 1194–1200 (2014)           | 2014 | TiO2 | mTiO2 | MAPbI3      | one-step | spin     | no      | GBL      | no           | no     | 0.8  |
| Ito, S. et al., ChemPhysChem 15, 1194–1200 (2014)           | 2014 | TiO2 | mTiO2 | MAPbI3      | one-step | spin     | no      | GBL      | CuSCN        | no     | 4.9  |
| Ito, S. et al., ChemPhysChem 15, 1194–1200 (2014)           | 2014 | TiO2 | mTiO2 | MAPbI3      | one-step | spin     | no      | GBL      | CuSCN        | no     | 1.8  |
| Ito, S. et al., J. Phys. Chem. C 118, 16995–17000 (2014)    | 2014 | TiO2 | mTiO2 | MAPbI3      | one-step | spin     | no      | GBL      | CuSCN        | no     | 5.1  |
| Ito, S. et al., J. Phys. Chem. C 118, 16995–17000 (2014)    | 2014 | TiO2 | mTiO2 | MAPbI3      | one-step | spin     | no      | GBL      | CuSCN        | no     | 4.8  |
| Jeon, N. J. et al., Nat. Mater. 13, 897–903 (2014)          | 2014 | TiO2 | mTiO2 | MAPbI3      | one-step | spin 2-3 | toluene | DMSO+GBL | spiro-OMeTAD | Li+TBP | 18   |
| Jeon, N. J. et al., J. Am. Chem. Soc. 136, 7837–7840 (2014) | 2014 | TiO2 | mTiO2 | MAPbI3      | one-step | spin 2-3 | toluene | DMSO+GBL | spiro-OMeTAD | Li+TBP | 15.2 |
| Jeon, N. J. et al., J. Am. Chem. Soc. 136, 7837–7840 (2014) | 2014 | TiO2 | mTiO2 | MAPbI3      | one-step | spin 2-3 | toluene | DMSO+GBL | spiro-OMeTAD | Li+TBP | 14.9 |
| Jeon, N. J. et al., J. Am. Chem. Soc. 136, 7837–7840 (2014) | 2014 | TiO2 | mTiO2 | MAPbI3      | one-step | spin 2-3 | toluene | DMSO+GBL | spiro-OMeTAD | Li+TBP | 13.9 |
| Jeon, N. J. et al., Nat. Mater. 13, 897–903 (2014)          | 2014 | TiO2 | 0     | MAPbI3-xBrx | one-step | spin 2-3 | toluene | DMSO+GBL | PTAA         | no     | 15.8 |

|                                                                    |      |                  |                                 |                                      |          |          |         |          |              |               |      |
|--------------------------------------------------------------------|------|------------------|---------------------------------|--------------------------------------|----------|----------|---------|----------|--------------|---------------|------|
| Jeon, N. J. et al., Nat. Mater. 13, 897–903 (2014)                 | 2014 | TiO <sub>2</sub> | mTiO <sub>2</sub>               | MAPbI <sub>3</sub> -xBr <sub>x</sub> | one-step | spin 2-3 | toluene | DMSO+GBL | PTAA         | no            | 16.7 |
| Juarez-Perez, E. J. et al., J. Phys. Chem. Lett. 5, 680–685 (2014) | 2014 | 0                | mTiO <sub>2</sub>               | MAPbI <sub>3</sub>                   | two-step | spin-dip | no      | DMF      | no           | no            | 0.1  |
| Juarez-Perez, E. J. et al., J. Phys. Chem. Lett. 5, 680–685 (2014) | 2014 | ZnO              | mTiO <sub>2</sub>               | MAPbI <sub>3</sub>                   | two-step | spin-dip | no      | DMF      | no           | no            | 1.8  |
| Juarez-Perez, E. J. et al., J. Phys. Chem. Lett. 5, 680–685 (2014) | 2014 | CdS              | mAl <sub>2</sub> O <sub>3</sub> | MAPbI <sub>3</sub>                   | two-step | spin-dip | no      | DMF      | spiro-OMeTAD | Li+TBP        | 1.5  |
| Juarez-Perez, E. J. et al., J. Phys. Chem. Lett. 5, 680–685 (2014) | 2014 | 0                | mTiO <sub>2</sub>               | MAPbI <sub>3</sub>                   | two-step | spin-dip | no      | DMF      | spiro-OMeTAD | Li+TBP        | 5    |
| Juarez-Perez, E. J. et al., J. Phys. Chem. Lett. 5, 680–685 (2014) | 2014 | ZnO              | mTiO <sub>2</sub>               | MAPbI <sub>3</sub>                   | two-step | spin-dip | no      | DMF      | spiro-OMeTAD | Li+TBP        | 9.1  |
| Juarez-Perez, E. J. et al., J. Phys. Chem. Lett. 5, 680–685 (2014) | 2014 | ZnO              | mTiO <sub>2</sub>               | MAPbI <sub>3</sub>                   | two-step | spin-dip | no      | DMF      | spiro-OMeTAD | Li+TBP        | 7.9  |
| Ke, W. et al., ACS Appl. Mater. Interfaces 6, 15959–15965 (2014)   | 2014 | TiO <sub>2</sub> | mTiO <sub>2</sub>               | MAPbI <sub>3</sub>                   | two-step | spin-dip | no      | DMF      | spiro-OMeTAD | Li+TBP        | 15.1 |
| Koh, T. M. et al., ChemSusChem 7, 1909–1914 (2014)                 | 2014 | TiO <sub>2</sub> | mTiO <sub>2</sub>               | MAPbI <sub>3</sub>                   | two-step | spin-dip | no      | DMF      | spiro-OMeTAD | Li+TBP+FK 209 | 11   |



|                                                                  |      |      |       |        |          |          |    |     |              |                  |      |
|------------------------------------------------------------------|------|------|-------|--------|----------|----------|----|-----|--------------|------------------|------|
| Koh, T. M. et al., ChemSusChem 7, 1909–1914 (2014)               | 2014 | TiO2 | mTiO2 | MAPbI3 | two-step | spin-dip | no | DMF | spiro-OMeTAD | Li+TBP+MY<br>11  | 11.9 |
| Krishna, A. et al., Chem. Sci. 5, 2702–2709 (2014)               | 2014 | TiO2 | mTiO2 | MAPbI3 | two-step | spin-dip | no | DMF | no           | no               | 4.7  |
| Krishna, A. et al., Chem. Sci. 5, 2702–2709 (2014)               | 2014 | TiO2 | mTiO2 | MAPbI3 | two-step | spin-dip | no | DMF | T1no3        | Li+TBP+FK<br>102 | 12.4 |
| Krishna, A. et al., Chem. Sci. 5, 2702–2709 (2014)               | 2014 | TiO2 | mTiO2 | MAPbI3 | two-step | spin-dip | no | DMF | T1no2        | Li+TBP+FK<br>102 | 12.2 |
| Krishna, A. et al., Chem. Sci. 5, 2702–2709 (2014)               | 2014 | TiO2 | mTiO2 | MAPbI3 | two-step | spin-dip | no | DMF | T1no1        | Li+TBP+FK<br>102 | 8.4  |
| Krishna, A. et al., Chem. Sci. 5, 2702–2709 (2014)               | 2014 | TiO2 | mTiO2 | MAPbI3 | two-step | spin-dip | no | DMF | spiro-OMeTAD | Li+TBP+FK<br>102 | 12.9 |
| Krishnamoorthy, T. et al., J. Mater. Chem. A 2, 6305–6309 (2014) | 2014 | TiO2 | mTiO2 | MAPbI3 | two-step | spin-dip | no | DMF | KTM3         | no               | 7.3  |
| Krishnamoorthy, T. et al., J. Mater. Chem. A 2, 6305–6309 (2014) | 2014 | TiO2 | mTiO2 | MAPbI3 | two-step | spin-dip | no | DMF | KTM3         | Li+TBP+FK<br>102 | 8.7  |
| Krishnamoorthy, T. et al., J. Mater. Chem. A 2, 6305–6309 (2014) | 2014 | TiO2 | mTiO2 | MAPbI3 | two-step | spin-dip | no | DMF | KTM3         | Li+TBP+FK<br>209 | 11   |
| Krishnamoorthy, T. et al., J. Mater. Chem. A 2, 6305–6309 (2014) | 2014 | TiO2 | mTiO2 | MAPbI3 | two-step | spin-dip | no | DMF | spiro-OMeTAD | Li+TBP+FK<br>209 | 11.4 |

|                                                         |      |      |       |        |          |              |    |     |              |        |      |
|---------------------------------------------------------|------|------|-------|--------|----------|--------------|----|-----|--------------|--------|------|
| Kwon, Y. S. et al., Energy Environ. Sci. 7, 1454 (2014) | 2014 | TiO2 | mTiO2 | MAPbI3 | one-step | spin 2-3     | no | GBL | PDPPDBTE     | no     | 9.2  |
| Kwon, Y. S. et al., Energy Environ. Sci. 7, 1454 (2014) | 2014 | TiO2 | mTiO2 | MAPbI3 | one-step | spin 2-3     | no | GBL | P3HT         | Li+TBP | 6.3  |
| Kwon, Y. S. et al., Energy Environ. Sci. 7, 1454 (2014) | 2014 | TiO2 | mTiO2 | MAPbI3 | one-step | spin 2-3     | no | GBL | spiro-OMeTAD | Li+TBP | 7.6  |
| Lee, J.-W. et al., ChemPhysChem 15, 2595–2603 (2014)    | 2014 | TiO2 | mTiO2 | MAPbI3 | one-step | spin         | no | DMA | PTB-DCB21    | no     | 8.7  |
| Lee, J.-W. et al., ChemPhysChem 15, 2595–2603 (2014)    | 2014 | TiO2 | mTiO2 | MAPbI3 | one-step | spin         | no | DMA | PTB-BO       | no     | 7.4  |
| Lee, J.-W. et al., ChemPhysChem 15, 2595–2603 (2014)    | 2014 | TiO2 | mTiO2 | MAPbI3 | one-step | spin         | no | DMA | spiro-OMeTAD | no     | 7    |
| Lee, J.-W. et al., ChemPhysChem 15, 2595–2603 (2014)    | 2014 | TiO2 | mTiO2 | MAPbI3 | one-step | spin         | no | DMA | PTB-DCB21    | Li+TBP | 9.5  |
| Lee, J.-W. et al., ChemPhysChem 15, 2595–2603 (2014)    | 2014 | TiO2 | mTiO2 | MAPbI3 | one-step | spin         | no | DMA | spiro-OMeTAD | Li+TBP | 11.6 |
| Lee, J. W. et al., Adv. Mater. 26, 4991–4998 (2014)     | 2014 | TiO2 | mTiO2 | FAPbI3 | two-step | spin 2-3-dip | no | DMF | spiro-OMeTAD | Li+TBP | 16   |
| Lee, J.-W. et al., J. Mater. Chem. A 2, 9251 (2014)     | 2014 | TiO2 | mTiO2 | MAPbI3 | one-step | spin         | no | DMA | spiro-OMeTAD | Li+TBP | 9    |
| Lee, J.-W. et al., J. Mater. Chem. A 2, 9251 (2014)     | 2014 | TiO2 | mTiO2 | MAPbI3 | two-step | spin-dip     | no | DMA | spiro-OMeTAD | Li+TBP | 14.5 |

|                                                                     |      |      |       |             |          |          |    |     |              |                  |      |
|---------------------------------------------------------------------|------|------|-------|-------------|----------|----------|----|-----|--------------|------------------|------|
| Leijtens, T. et al., J. Phys. Chem. Lett. 5, 1096–1102 (2014)       | 2014 | TiO2 | mTiO2 | MAPbI3-xClx | one-step | spin     | no | DMF | spiro-OMeTAD | Li+TBP           | 8.6  |
| Li, H. et al., Angew. Chemie - Int. Ed. 53, 4085–4088 (2014)        | 2014 | TiO2 | mTiO2 | MAPbI3      | two-step | spin-dip | no | na  | H1no1        | Li+TBP           | 11.1 |
| Li, H. et al., Angew. Chemie - Int. Ed. 53, 4085–4088 (2014)        | 2014 | TiO2 | mTiO2 | MAPbI3      | two-step | spin-dip | no | na  | H1no1        | Li+TBP+FK<br>102 | 13.8 |
| Li, H. et al., Angew. Chemie - Int. Ed. 53, 4085–4088 (2014)        | 2014 | TiO2 | mTiO2 | MAPbI3      | two-step | spin-dip | no | na  | spiro-OMeTAD | Li+TBP+FK<br>102 | 13.7 |
| Li, Z. et al., ACS Nano 8, 6797–6804 (2014)                         | 2014 | TiO2 | mTiO2 | MAPbI3      | two-step | spin-dip | no | DMF | no           | no               | 6.9  |
| Li, Z. et al., ACS Nano 8, 6797–6804 (2014)                         | 2014 | TiO2 | mTiO2 | MAPbI3      | two-step | spin-dip | no | DMF | no           | no               | 5.1  |
| Li, Z. et al., ACS Nano 8, 6797–6804 (2014)                         | 2014 | TiO2 | mTiO2 | MAPbI3      | two-step | spin-dip | no | DMF | spiro-OMeTAD | Li+TBP+FK<br>102 | 9.9  |
| Li, W. et al., J. Mater. Chem. A 2, 13587–13592 (2014)              | 2014 | TiO2 | mTiO2 | MAPbI3      | two-step | spin-dip | no | DMF | spiro-OMeTAD | Li+TBP           | 11.9 |
| Li, W. et al., J. Mater. Chem. A 2, 13587–13592 (2014)              | 2014 | TiO2 | mTiO2 | MAPbI3      | two-step | spin-dip | no | DMF | spiro-OMeTAD | Li+TBP           | 9    |
| Liang, L. et al., ACS Appl. Mater. Interfaces 6, 20585–20589 (2014) | 2014 | ZnO  | 0     | MAPbI3      | two-step | spin-dip | no | DMF | spiro-OMeTAD | Li+TBP           | 13.4 |
| Liang, L. et al., ACS Appl. Mater. Interfaces 6, 20585–20589 (2014) | 2014 | ZnO  | 0     | MAPbI3      | two-step | spin-dip | no | DMF | spiro-OMeTAD | Li+TBP           | 7    |

|                                                                               |      |      |       |        |          |          |    |     |              |        |      |
|-------------------------------------------------------------------------------|------|------|-------|--------|----------|----------|----|-----|--------------|--------|------|
| Liu, J. et al., Energy Environ. Sci. 7, 2963–2967 (2014)                      | 2014 | TiO2 | mTiO2 | MAPbI3 | two-step | spin-dip | no | DMF | TTF-1        | no     | 11   |
| Liu, J. et al., Energy Environ. Sci. 7, 2963–2967 (2014)                      | 2014 | TiO2 | mTiO2 | MAPbI3 | two-step | spin-dip | no | DMF | P3HT         | no     | 6.2  |
| Liu, J. et al., Energy Environ. Sci. 7, 2963–2967 (2014)                      | 2014 | TiO2 | mTiO2 | MAPbI3 | two-step | spin-dip | no | DMF | spiro-OMeTAD | no     | 6.2  |
| Liu, J. et al., Energy Environ. Sci. 7, 2963–2967 (2014)                      | 2014 | TiO2 | mTiO2 | MAPbI3 | two-step | spin-dip | no | DMF | TTF-1        | Li+TBP | 4.4  |
| Liu, J. et al., Energy Environ. Sci. 7, 2963–2967 (2014)                      | 2014 | TiO2 | mTiO2 | MAPbI3 | two-step | spin-dip | no | DMF | P3HT         | Li+TBP | 6.7  |
| Liu, J. et al., Energy Environ. Sci. 7, 2963–2967 (2014)                      | 2014 | TiO2 | mTiO2 | MAPbI3 | two-step | spin-dip | no | DMF | spiro-OMeTAD | Li+TBP | 11.4 |
| Liu, D., Yang, J. and Kelly, T. L., J. Am. Chem. Soc. 136, 17116–17122 (2014) | 2014 | ZnO  | 0     | MAPbI3 | two-step | spin-dip | no | DMF | P3HT         | Li+TBP | 11.7 |
| Liu, D., Yang, J. and Kelly, T. L., J. Am. Chem. Soc. 136, 17116–17122 (2014) | 2014 | no   | no    | MAPbI3 | two-step | spin-dip | no | DMF | P3HT         | Li+TBP | 11.6 |
| Liu, D., Yang, J. and Kelly, T. L., J. Am. Chem. Soc. 136, 17116–17122 (2014) | 2014 | ZnO  | no    | MAPbI3 | two-step | spin-dip | no | DMF | spiro-OMeTAD | Li+TBP | 14.7 |
| Liu, D., Yang, J. and Kelly, T. L., J. Am. Chem. Soc. 136, 17116–17122 (2014) | 2014 | no   | no    | MAPbI3 | two-step | spin-dip | no | DMF | spiro-OMeTAD | Li+TBP | 13.5 |

|                                                            |      |        |          |        |          |          |    |     |              |        |      |
|------------------------------------------------------------|------|--------|----------|--------|----------|----------|----|-----|--------------|--------|------|
| Lv, S. et al., Chem. Commun. 50, 6931 (2014)               | 2014 | TiO2   | mTiO2    | MAPbI3 | two-step | spin-dip | no | DMF | HTM2         | no     | 11.6 |
| Lv, S. et al., Chem. Commun. 50, 6931 (2014)               | 2014 | TiO2   | mTiO2    | MAPbI3 | two-step | spin-dip | no | DMF | HTM1         | no     | 11.3 |
| Mahmood, K. et al., Nanoscale 6, 9127 (2014)               | 2014 | ZnO    | mZnO     | MAPbI3 | two-step | spin-dip | no | DMF | spiro-OMeTAD | Li+TBP | 10.9 |
| Mahmood, K. et al., Nanoscale 6, 9127 (2014)               | 2014 | ZnO-Al | m-Al-ZnO | MAPbI3 | two-step | spin-dip | no | DMF | spiro-OMeTAD | Li+TBP | 12.2 |
| Manseki, K. et al., RSC Adv. 4, 9652–9655 (2014)           | 2014 | TiO2   | TiO2     | MAPbI3 | one-step | spin 2-3 | no | GBL | P3HT         | Li+TBP | 4.2  |
| Manseki, K. et al., RSC Adv. 4, 9652–9655 (2014)           | 2014 | TiO2   | TiO2     | MAPbI3 | one-step | spin 2-3 | no | GBL | P3HT         | Li+TBP | 3.1  |
| Moehl, T. et al., J. Phys. Chem. Lett. 5, 3931–3936 (2014) | 2014 | TiO2   | mTiO2    | MAPbI3 | two-step | spin     | no | DMF | spiro-OMeTAD | Li+TBP | 17.1 |
| Moehl, T. et al., J. Phys. Chem. Lett. 5, 3931–3936 (2014) | 2014 | TiO2   | mTiO2    | MAPbI3 | two-step | spin-dip | no | DMF | spiro-OMeTAD | Li+TBP | 14.6 |
| Nagarjuna, P. et al., Electrochim. Acta 151, 21–26 (2014)  | 2014 | TiO2   | mTiO2    | MAPbI3 | one-step | spin     | no | DMF | no           | no     | 2.7  |
| Nagarjuna, P. et al., Electrochim. Acta 151, 21–26 (2014)  | 2014 | TiO2   | mTiO2    | MAPbI3 | one-step | spin     | no | DMF | copolymerP   | no     | 6.6  |
| Nagarjuna, P. et al., Electrochim. Acta 151, 21–26 (2014)  | 2014 | TiO2   | mTiO2    | MAPbI3 | one-step | spin     | no | DMF | P3HT         | no     | 4.2  |

|                                                                       |      |                  |                                 |                              |          |          |    |     |              |                                  |      |
|-----------------------------------------------------------------------|------|------------------|---------------------------------|------------------------------|----------|----------|----|-----|--------------|----------------------------------|------|
| Nguyen, W. H. et al.,<br>J. Am. Chem. Soc. 136, 10996–11001<br>(2014) | 2014 | TiO <sub>2</sub> | mTiO <sub>2</sub>               | MAPbI <sub>3</sub>           | two-step | spin-dip | no | DMF | spiro-OMeTAD | Li+TBP                           | 10.5 |
| Nguyen, W. H. et al.,<br>J. Am. Chem. Soc. 136, 10996–11001 (2014)    | 2014 | TiO <sub>2</sub> | mTiO <sub>2</sub>               | MAPbI <sub>3</sub>           | two-step | spin-dip | no | DMF | spiro-OMeTAD | spiro(TFSI) <sub>2</sub><br>+TBP | 10.6 |
| Niu, G. et al., J. Mater. Chem. A 2, 705–710<br>(2014)                | 2014 | TiO <sub>2</sub> | mTiO <sub>2</sub>               | MAPbI <sub>3</sub>           | one-step | spin 2-3 | no | DMF | spiro-OMeTAD | Li+TBP                           | 4.7  |
| Niu, G. et al., J. Mater. Chem. A 2,<br>705–710 (2014)                | 2014 | TiO <sub>2</sub> | mTiO <sub>2</sub>               | MAPbI <sub>3</sub>           | one-step | spin 2-3 | no | DMF | spiro-OMeTAD | Li+TBP                           | 4.6  |
| Noel, N. K. et al., ACS Nano 8, 9815–<br>9821 (2014)                  | 2014 | TiO <sub>2</sub> | 0                               | MAPbI <sub>3</sub> -xClx     | one-step | spin     | no | DMF | spiro-OMeTAD | Li+TBP                           | 16.5 |
| Noel, N. K. et al., ACS Nano 8, 9815–<br>9821 (2014)                  | 2014 | TiO <sub>2</sub> | 0                               | MAPbI <sub>3</sub> -xClx     | one-step | spin     | no | DMF | spiro-OMeTAD | Li+TBP                           | 15.3 |
| Noel, N. K. et al., ACS Nano 8, 9815–<br>9821 (2014)                  | 2014 | TiO <sub>2</sub> | 0                               | MAPbI <sub>3</sub> -xClx     | one-step | spin     | no | DMF | spiro-OMeTAD | Li+TBP                           | 13.1 |
| Noel, N. K. et al., Energy Environ. Sci. 7,<br>3061–3068 (2014)       | 2014 | TiO <sub>2</sub> | mAl <sub>2</sub> O <sub>3</sub> | MAPbI <sub>3</sub> -xClx     | one-step | spin     | no | DMF | spiro-OMeTAD | H+TBP                            | 15   |
| Noel, N. K. et al., Energy Environ. Sci.<br>7, 3061–3068 (2014)       | 2014 | TiO <sub>2</sub> | mTiO <sub>2</sub>               | MAPbI <sub>3</sub> -xClx     | one-step | spin     | no | DMF | spiro-OMeTAD | H+TBP                            | 11.5 |
| Noel, N. K. et al., Energy Environ. Sci. 7,<br>3061–3068 (2014)       | 2014 | TiO <sub>2</sub> | mTiO <sub>2</sub>               | MASnI <sub>3</sub>           | one-step | spin     | no | DMF | spiro-OMeTAD | H+TBP                            | 6.4  |
| Ogomi, Y. et al., J. Phys. Chem. Lett. 5, 1004–<br>1011 (2014)        | 2014 | TiO <sub>2</sub> | mTiO <sub>2</sub>               | MASn1-<br>xPbxI <sub>3</sub> | one-step | spin     | no | DMF | P3HT         | no                               | 4.2  |

|                                                                  |      |      |        |             |          |          |    |     |              |        |      |
|------------------------------------------------------------------|------|------|--------|-------------|----------|----------|----|-----|--------------|--------|------|
| Ogomi, Y. et al., J. Phys. Chem. Lett. 5, 1004–1011 (2014)       | 2014 | TiO2 | mTiO2  | MAPbI3      | one-step | spin     | no | DMF | spiro-OMeTAD | Li+TBP | 12   |
| Ogomi, Y. et al., in ChemPhysChem 15, 1062–1069 (2014)           | 2014 | TiO2 | mTiO2  | MAPbI3-xClx | one-step | spin     | no | DMF | spiro-OMeTAD | Li+TBP | 7.5  |
| Ogomi, Y. et al., in ChemPhysChem 15, 1062–1069 (2014)           | 2014 | TiO2 | mTiO2  | MAPbI3-xClx | one-step | spin     | no | DMF | spiro-OMeTAD | Li+TBP | 7    |
| Ogomi, Y. et al., in ChemPhysChem 15, 1062–1069 (2014)           | 2014 | TiO2 | mTiO2  | MAPbI3-xClx | one-step | spin     | no | DMF | spiro-OMeTAD | Li+TBP | 6.6  |
| Pang, S. et al., Chem. Mater. 26, 1485–1491 (2014)               | 2014 | TiO2 | mTiO2  | FAPbI3      | one-step | spin     | no | DMF | P3HT         | no     | 3.7  |
| Pang, S. et al., Chem. Mater. 26, 1485–1491 (2014)               | 2014 | TiO2 | mTiO2  | FAPbI3      | two-step | spin-dip | no | DMF | P3HT         | no     | 7.5  |
| Pathak, S. K. et al., Adv. Funct. Mater. 24, 6046–6055 (2014)    | 2014 | TiO2 | mAl2O3 | MAPbI3-xClx | one-step | spin     | no | DMF | spiro-OMeTAD | Li+TBP | 13.8 |
| Pathak, S. K. et al., Adv. Funct. Mater. 24, 6046–6055 (2014)    | 2014 | TiO2 | mAl2O3 | MAPbI3-xClx | one-step | spin     | no | DMF | spiro-OMeTAD | Li+TBP | 11.1 |
| Pellet, N. et al., Angew. Chemie - Int. Ed. 53, 3151–3157 (2014) | 2014 | TiO2 | mTiO2  | MAPbI3      | two-step | spin-dip | no | DMF | spiro-OMeTAD | Li+TBP | 12.5 |
| Pellet, N. et al., Angew. Chemie - Int. Ed. 53, 3151–3157 (2014) | 2014 | TiO2 | mTiO2  | FAPbI3      | two-step | spin-dip | no | DMF | spiro-OMeTAD | Li+TBP | 11   |

|                                                                         |      |                  |                   |                                |          |              |    |     |              |        |      |
|-------------------------------------------------------------------------|------|------------------|-------------------|--------------------------------|----------|--------------|----|-----|--------------|--------|------|
| Pellet, N. et al., <i>Angew. Chemie - Int. Ed.</i> 53, 3151–3157 (2014) | 2014 | TiO <sub>2</sub> | mTiO <sub>2</sub> | (MA)0.6(FA)0.4PbI <sub>3</sub> | two-step | spin-dip     | no | DMF | spiro-OMeTAD | Li+TBP | 14.9 |
| Qin, P. et al., <i>Nat. Commun.</i> 5, 3834 (2014)                      | 2014 | TiO <sub>2</sub> | mTiO <sub>2</sub> | MAPbI <sub>3</sub>             | two-step | spin 2-3-dip | no | DMF | no           | no     | 6.7  |
| Qin, P. et al., <i>Nat. Commun.</i> 5, 3834 (2014)                      | 2014 | TiO <sub>2</sub> | mTiO <sub>2</sub> | MAPbI <sub>3</sub>             | two-step | spin-dip     | no | DMF | no           | no     | 3.8  |
| Qin, P. et al., <i>Nat. Commun.</i> 5, 3834 (2014)                      | 2014 | TiO <sub>2</sub> | mTiO <sub>2</sub> | MAPbI <sub>3</sub>             | two-step | spin 2-3-dip | no | DMF | CuSCN        | no     | 12.4 |
| Qin, P. et al., <i>Nat. Commun.</i> 5, 3834 (2014)                      | 2014 | TiO <sub>2</sub> | mTiO <sub>2</sub> | MAPbI <sub>3</sub>             | two-step | spin-dip     | no | DMF | CuSCN        | no     | 11.2 |
| Qin, P. et al., <i>J. Am. Chem. Soc.</i> 136, 8516–8519 (2014)          | 2014 | TiO <sub>2</sub> | mTiO <sub>2</sub> | MAPbI <sub>3</sub>             | two-step | spin-dip     | no | DMF | no           | no     | 7.7  |
| Qin, P. et al., <i>J. Am. Chem. Soc.</i> 136, 8516–8519 (2014)          | 2014 | TiO <sub>2</sub> | mTiO <sub>2</sub> | MAPbI <sub>3</sub>             | two-step | spin-dip     | no | DMF | Fused-F      | no     | 12.8 |
| Qin, P. et al., <i>J. Am. Chem. Soc.</i> 136, 8516–8519 (2014)          | 2014 | TiO <sub>2</sub> | mTiO <sub>2</sub> | MAPbI <sub>3</sub>             | two-step | spin-dip     | no | DMF | spiro-OMeTAD | Li+TBP | 11.7 |
| Qin, P. et al., <i>Nanoscale</i> 6, 1508–1514 (2014)                    | 2014 | TiO <sub>2</sub> | mTiO <sub>2</sub> | MAPbI <sub>3</sub>             | one-step | spin         | no | GBL | spiro-OMeTAD | Li+TBP | 10.6 |
| Qin, P. et al., <i>Nanoscale</i> 6, 1508–1514 (2014)                    | 2014 | TiO <sub>2</sub> | mTiO <sub>2</sub> | MAPbI <sub>3</sub>             | one-step | spin         | no | GBL | spiro-OMeTAD | Li+TBP | 11.4 |
| Ramos, F. J. et al., <i>ChemPhysChem</i> 15, 1148–1153 (2014)           | 2014 | TiO <sub>2</sub> | ZnO-nanocolumn    | MAPbI <sub>3</sub>             | two-step | spin-dip     | no | DMF | PTAA         | Li+TBP | 1.3  |



|                                                                 |      |                  |                   |                                                        |          |              |         |         |              |              |      |
|-----------------------------------------------------------------|------|------------------|-------------------|--------------------------------------------------------|----------|--------------|---------|---------|--------------|--------------|------|
| Ramos, F. J. et al., ChemPhysChem 15, 1148–1153 (2014)          | 2014 | TiO <sub>2</sub> | ZnO-nanocolumn    | MAPbI <sub>3</sub>                                     | two-step | spin-dip     | no      | DMF     | spiro-OMeTAD | Li+TBP+FK209 | 4.8  |
| Ryu, S. et al., Energy Environ. Sci. 7, 2614–2618 (2014)        | 2014 | TiO <sub>2</sub> | mTiO <sub>2</sub> | MAPbBr <sub>3</sub>                                    | one-step | spin 2-3     | toluene | DMF+GBL | PIF8-TAA     | Li+TBP       | 6.7  |
| Ryu, S. et al., Energy Environ. Sci. 7, 2614–2618 (2014)        | 2014 | TiO <sub>2</sub> | mTiO <sub>2</sub> | MAPbBr <sub>3</sub>                                    | one-step | spin 2-3     | toluene | DMF+GBL | PF8-TAA      | Li+TBP       | 6    |
| Ryu, S. et al., Energy Environ. Sci. 7, 2614–2618 (2014)        | 2014 | TiO <sub>2</sub> | mTiO <sub>2</sub> | MAPbI <sub>3</sub>                                     | one-step | spin 2-3     | toluene | DMF+GBL | PIF8-TAA     | Li+TBP       | 9.1  |
| Ryu, S. et al., Energy Environ. Sci. 7, 2614–2618 (2014)        | 2014 | TiO <sub>2</sub> | mTiO <sub>2</sub> | MAPbI <sub>3</sub>                                     | one-step | spin 2-3     | toluene | DMF+GBL | PF8-TAA      | Li+TBP       | 4.6  |
| Ryu, S. et al., Energy Environ. Sci. 7, 2614–2618 (2014)        | 2014 | TiO <sub>2</sub> | mTiO <sub>2</sub> | MAPbBr <sub>3</sub>                                    | one-step | spin 2-3     | toluene | DMF+GBL | PTAA         | Li+TBP       | 5.9  |
| Ryu, S. et al., Energy Environ. Sci. 7, 2614–2618 (2014)        | 2014 | TiO <sub>2</sub> | mTiO <sub>2</sub> | MAPbI <sub>3</sub>                                     | one-step | spin 2-3     | toluene | DMF+GBL | PTAA         | Li+TBP       | 16.2 |
| Sarkar, A. et al., J. Phys. Chem. C 118, 16688–16693 (2014)     | 2014 | TiO <sub>2</sub> | mTiO <sub>2</sub> | MAPb(I <sub>0.9</sub> Br <sub>0.1</sub> ) <sub>3</sub> | one-step | spin 2-3     | no      | GBL     | PTAA         | no           | 12.8 |
| Shi, J. et al., Appl. Phys. Lett. 104, 063901 (2014)            | 2014 | TiO <sub>2</sub> | mTiO <sub>2</sub> | MAPbI <sub>3</sub>                                     | two-step | spin-dip     | no      | DMF     | no           | no           | 10.5 |
| Shi, J. et al., ACS Appl. Mater. Interfaces 6, 9711–9718 (2014) | 2014 | TiO <sub>2</sub> | mTiO <sub>2</sub> | MAPbI <sub>3</sub>                                     | two-step | spin 2-3-dip | no      | DMF     | no           | no           | 10.5 |
| Son, D.-Y. et al., J. Phys. Chem. C 118, 16567–16573 (2014)     | 2014 | TiO <sub>2</sub> | TiO <sub>2</sub>  | MAPbI <sub>3</sub>                                     | two-step | spin         | no      | DMF     | spiro-OMeTAD | Li+TBP       | 10   |

|                                                             |      |      |             |                     |          |      |    |     |              |        |      |
|-------------------------------------------------------------|------|------|-------------|---------------------|----------|------|----|-----|--------------|--------|------|
| Son, D.-Y. et al., J. Phys. Chem. C 118, 16567–16573 (2014) | 2014 | ZnO  | ZnO-nanorod | MAPbI3              | two-step | spin | no | DMF | spiro-OMeTAD | Li+TBP | 11.1 |
| Suarez, B. et al., J. Phys. Chem. Lett. 5, 1628–1635 (2014) | 2014 | TiO2 | mTiO2       | MAPbBr3             | one-step | spin | no | GBL | spiro-OMeTAD | Li+TBP | 1.4  |
| Suarez, B. et al., J. Phys. Chem. Lett. 5, 1628–1635 (2014) | 2014 | TiO2 | mAl2O3      | MAPbBr3-xClx        | one-step | spin | no | GBL | spiro-OMeTAD | Li+TBP | 3.2  |
| Suarez, B. et al., J. Phys. Chem. Lett. 5, 1628–1635 (2014) | 2014 | TiO2 | mTiO2       | MAPbBr3-xClx        | one-step | spin | no | GBL | spiro-OMeTAD | Li+TBP | 2.9  |
| Suarez, B. et al., J. Phys. Chem. Lett. 5, 1628–1635 (2014) | 2014 | TiO2 | mTiO2       | MAPbI3              | one-step | spin | no | GBL | spiro-OMeTAD | Li+TBP | 6.5  |
| Suarez, B. et al., J. Phys. Chem. Lett. 5, 1628–1635 (2014) | 2014 | TiO2 | mAl2O3      | MAPbI3-xBrx         | one-step | spin | no | GBL | spiro-OMeTAD | Li+TBP | 4.5  |
| Suarez, B. et al., J. Phys. Chem. Lett. 5, 1628–1635 (2014) | 2014 | TiO2 | mTiO2       | MAPbI3-xBrx         | one-step | spin | no | GBL | spiro-OMeTAD | Li+TBP | 2.9  |
| Suarez, B. et al., J. Phys. Chem. Lett. 5, 1628–1635 (2014) | 2014 | TiO2 | 0           | MAPbI3-xClx         | one-step | spin | no | GBL | spiro-OMeTAD | Li+TBP | 11.1 |
| Suarez, B. et al., J. Phys. Chem. Lett. 5, 1628–1635 (2014) | 2014 | TiO2 | mAl2O3      | MAPbI3-xClx         | one-step | spin | no | GBL | spiro-OMeTAD | Li+TBP | 12.5 |
| Suarez, B. et al., J. Phys. Chem. Lett. 5, 1628–1635 (2014) | 2014 | TiO2 | mTiO2       | MAPbI3-xClx         | one-step | spin | no | GBL | spiro-OMeTAD | Li+TBP | 10.9 |
| Suarez, B. et al., J. Phys. Chem. Lett. 5, 1628–1635 (2014) | 2014 | TiO2 | 0           | MAPb(I1-xBrx)3-yCly | one-step | spin | no | GBL | spiro-OMeTAD | Li+TBP | 3.9  |

|                                                                    |      |           |        |                    |          |          |    |     |              |        |      |
|--------------------------------------------------------------------|------|-----------|--------|--------------------|----------|----------|----|-----|--------------|--------|------|
| Suarez, B. et al., J. Phys. Chem. Lett. 5, 1628–1635 (2014)        | 2014 | TiO2      | mTiO2  | MAPb(1-xBrx)3-yClx | one-step | spin     | no | GBL | spiro-OMeTAD | Li+TBP | 9.1  |
| Wang, J. T. W. et al., Nano Lett. 14, 724–730 (2014)               | 2014 | 0         | mAl2O3 | MAPbI3-xClx        | one-step | spin     | no | DMF | spiro-OMeTAD | Li+TBP | 3.7  |
| Wang, J. T. W. et al., Nano Lett. 14, 724–730 (2014)               | 2014 | TiO2      | mAl2O3 | MAPbI3-xClx        | one-step | spin     | no | DMF | spiro-OMeTAD | Li+TBP | 14.1 |
| Wang, J. T. W. et al., Nano Lett. 14, 724–730 (2014)               | 2014 | TiO2      | mAl2O3 | MAPbI3-xClx        | one-step | spin     | no | DMF | spiro-OMeTAD | Li+TBP | 15.6 |
| Wang, J. T. W. et al., Nano Lett. 14, 724–730 (2014)               | 2014 | graphe ne | mAl2O3 | MAPbI3-xClx        | one-step | spin     | no | DMF | spiro-OMeTAD | Li+TBP | 5.9  |
| Wang, X. et al., Mater. Sci. Semicond. Process. 27, 569–576 (2014) | 2014 | 0         | mTiO2  | MAPbI3             | one-step | spin     | no | GBL | P3HT         | Li+TBP | 1.3  |
| Wang, X. et al., Mater. Sci. Semicond. Process. 27, 569–576 (2014) | 2014 | TiO2      | mTiO2  | MAPbI3             | one-step | spin     | no | GBL | P3HT         | Li+TBP | 3.2  |
| Wang, J. et al., Chem. Commun. 50, 5829 (2014)                     | 2014 | TiO2      | mTiO2  | MAPbI3             | one-step | spin     | no | GBL | 2TPA-2-DP    | no     | 9.1  |
| Wang, J. et al., Chem. Commun. 50, 5829 (2014)                     | 2014 | TiO2      | mTiO2  | MAPbI3             | one-step | spin     | no | GBL | spiro-OMeTAD | Li+TBP | 10.2 |
| Wojciechowski, K. et al., Energy Environ. Sci. 7, 1142–1147 (2014) | 2014 | TiO2      | mAl2O3 | MAPbI3-xClx        | one-step | spin     | no | DMF | spiro-OMeTAD | Li+TBP | 15.9 |
| Wu, Y. et al., Appl. Phys. Express 7, 052301 (2014)                | 2014 | 0         | mTiO2  | MAPbI3             | two-step | spin-dip | no | DMF | spiro-OMeTAD | Li+TBP | 0.3  |

|                                                                |      |      |       |        |          |              |               |     |              |             |      |
|----------------------------------------------------------------|------|------|-------|--------|----------|--------------|---------------|-----|--------------|-------------|------|
| Wu, Y. et al., Appl. Phys. Express 7, 052301 (2014)            | 2014 | TiO2 | mTiO2 | MAPbI3 | two-step | spin-dip     | no            | DMF | spiro-OMeTAD | Li+TBP      | 12.6 |
| Xiao, M. et al., Angew. Chemie 126, 10056–10061 (2014)         | 2014 | TiO2 | 0     | MAPbI3 | one-step | spin         | chlorobenzene | DMF | spiro-OMeTAD | Li+TBP      | 16.2 |
| Xiao, M. et al., Angew. Chemie 126, 10056–10061 (2014)         | 2014 | TiO2 | 0     | MAPbI3 | one-step | spin         | no            | DMF | spiro-OMeTAD | Li+TBP      | 1.8  |
| Xiao, J. et al., RSC Adv. 4, 32918 (2014)                      | 2014 | TiO2 | mTiO2 | MAPbI3 | two-step | spin-dip     | no            | DMF | PNBA         | no          | 11.4 |
| Xu, Y. et al., ACS Appl. Mater. Interfaces 6, 5651–5656 (2014) | 2014 | TiO2 | mTiO2 | MAPbI3 | two-step | spin 2-3-dip | no            | DMF | no           | no          | 6.7  |
| Xu, Y. et al., ACS Appl. Mater. Interfaces 6, 5651–5656 (2014) | 2014 | TiO2 | mTiO2 | MAPbI3 | two-step | spin 2-3-dip | no            | DMF | no           | no          | 5.7  |
| Yella, A. et al., Nano Lett. 14, 2591–2596 (2014)              | 2014 | TiO2 | 0     | MAPbI3 | two-step | spin-dip     | no            | DMF | spiro-OMeTAD | Li+TBP      | 13.7 |
| Zhang, H. et al., Chem. Commun. 50, 5020 (2014)                | 2014 | TiO2 | mTiO2 | MAPbI3 | two-step | spin-dip     | no            | na  | spiro-OMeTAD | no          | 4    |
| Zhang, H. et al., Chem. Commun. 50, 5020 (2014)                | 2014 | TiO2 | mTiO2 | MAPbI3 | two-step | spin-dip     | no            | na  | spiro-OMeTAD | Li+TBP      | 8.4  |
| Zhang, H. et al., Chem. Commun. 50, 5020 (2014)                | 2014 | TiO2 | mTiO2 | MAPbI3 | two-step | spin-dip     | no            | na  | spiro-OMeTAD | BuPylm-TFSI | 8.2  |
| Zhang, F. et al., ACS Appl. Mater. Interfaces 6, 16140–        | 2014 | TiO2 | mTiO2 | MAPbI3 | one-step | spin         | no            | GBL | no           | no          | 8.3  |

|                                                        |      |      |       |             |          |          |    |     |               |        |      |
|--------------------------------------------------------|------|------|-------|-------------|----------|----------|----|-----|---------------|--------|------|
| 16146 (2014)                                           |      |      |       |             |          |          |    |     |               |        |      |
| Zhao, Y. et al., Appl. Phys. Lett. 104, 213906 (2014)  | 2014 | TiO2 | 0     | MAPbI3-xClx | one-step | spin     | no | DMF | spiro-OMeTAD  | Li+TBP | 12.4 |
| Zhao, Y. et al., Appl. Phys. Lett. 104, 213906 (2014)  | 2014 | TiO2 | 0     | MAPbI3-xClx | one-step | spin     | no | DMF | spiro-OMeTAD  | Li+TBP | 12   |
| Zhao, Y. et al., Appl. Phys. Lett. 104, 213906 (2014)  | 2014 | TiO2 | 0     | MAPbI3-xClx | one-step | spin     | no | DMF | spiro-OMeTAD  | Li+TBP | 11.4 |
| Zhao, Y. et al., Faraday Discuss. 176, 301–312 (2014)  | 2014 | TiO2 | mTiO2 | MAPbBr3     | one-step | spin     | no | DMF | spiro-OMeTAD  | Li+TBP | 4.1  |
| Zhao, Y. et al., Faraday Discuss. 176, 301–312 (2014)  | 2014 | TiO2 | mTiO2 | MAPbI3      | one-step | spin     | no | DMF | spiro-OMeTAD  | Li+TBP | 9.2  |
| Zhao, Y. et al., Faraday Discuss. 176, 301–312 (2014)  | 2014 | TiO2 | mTiO2 | MAPbI2Br    | one-step | spin     | no | DMF | spiro-OMeTAD  | Li+TBP | 6.8  |
| Zhao, Y. et al., Faraday Discuss. 176, 301–312 (2014)  | 2014 | TiO2 | mTiO2 | MAPbIBr2    | one-step | spin     | no | DMF | spiro-OMeTAD  | Li+TBP | 4.7  |
| Zheng, L. et al., Chem. Commun. 50, 11196–11199 (2014) | 2014 | TiO2 | 0     | MAPbI3-xClx | two-step | spin-dip | no | DMF | DR3TBDTT-PDMS | no     | 8.8  |
| Zheng, L. et al., Chem. Commun. 50, 11196–11199 (2014) | 2014 | TiO2 | 0     | MAPbI3-xClx | two-step | spin-dip | no | DMF | DR3TBDTT      | no     | 4.9  |
| Zheng, L. et al., Chem. Commun. 50, 11196–11199 (2014) | 2014 | TiO2 | 0     | MAPbI3-xClx | two-step | spin-dip | no | DMF | DR3TBDTT      | Li+TBP | 3.7  |

|                                                           |      |      |       |             |          |          |    |     |              |        |      |
|-----------------------------------------------------------|------|------|-------|-------------|----------|----------|----|-----|--------------|--------|------|
| Zheng, L. et al., Chem. Commun. 50, 11196–11199 (2014)    | 2014 | TiO2 | 0     | MAPbI3-xClx | two-step | spin-dip | no | DMF | spiro-OMeTAD | Li+TBP | 8.9  |
| Zhou, H. et al., J. Phys. Chem. Lett. 5, 3241–3246 (2014) | 2014 | TiO2 | mTiO2 | MAPbI3      | two-step | spin-dip | no | DMF | no           | no     | 9.1  |
| Zhou, H. et al., Science 345, 542-546 (2014)              | 2014 | TiO2 | 0     | MAPbI3-xClx | one-step | spin     | no | DMF | spiro-OMeTAD | Li+TBP | 19.3 |
| Zhu, Z. et al., J. Am. Chem. Soc. 136, 3760–3763 (2014)   | 2014 | TiO2 | mTiO2 | MAPbI3      | one-step | spin     | no | GBL | spiro-OMeTAD | Li+TBP | 8.8  |
| Zhu, Z. et al., J. Am. Chem. Soc. 136, 3760–3763 (2014)   | 2014 | TiO2 | mTiO2 | MAPbI3      | one-step | spin     | no | GBL | spiro-OMeTAD | Li+TBP | 10.2 |
| Zhu, Z. et al., Adv. Funct. Mater. 24, 7357–7365 (2014)   | 2014 | TiO2 | mTiO2 | MAPbI3      | one-step | spin     | no | DMF | TFB          | Li+TBP | 10.9 |
| Zhu, Z. et al., Adv. Funct. Mater. 24, 7357–7365 (2014)   | 2014 | TiO2 | mTiO2 | MAPbI3      | one-step | spin     | no | DMF | PFB          | Li+TBP | 8    |
| Zhu, Z. et al., Adv. Funct. Mater. 24, 7357–7365 (2014)   | 2014 | TiO2 | mTiO2 | MAPbI3      | one-step | spin     | no | DMF | PFO          | Li+TBP | 1.2  |
| Zhu, Z. et al., Adv. Funct. Mater. 24, 7357–7365 (2014)   | 2014 | TiO2 | mTiO2 | MAPbI3      | two-step | spin-dip | no | DMF | TFB          | Li+TBP | 12.8 |
| Zhu, Z. et al., Adv. Funct. Mater. 24, 7357–7365 (2014)   | 2014 | TiO2 | mTiO2 | MAPbI3      | two-step | spin-dip | no | DMF | PFB          | Li+TBP | 8.8  |
| Zhu, Z. et al., Adv. Funct. Mater. 24, 7357–7365 (2014)   | 2014 | TiO2 | mTiO2 | MAPbI3      | two-step | spin-dip | no | DMF | PFO          | Li+TBP | 1.6  |

|                                                                    |      |         |          |             |          |          |               |          |              |        |      |
|--------------------------------------------------------------------|------|---------|----------|-------------|----------|----------|---------------|----------|--------------|--------|------|
| Zhu, Z. et al., Adv. Funct. Mater. 24, 7357–7365 (2014)            | 2014 | TiO2    | mTiO2    | MAPbI3      | one-step | spin     | no            | DMF      | spiro-OMeTAD | Li+TBP | 9.8  |
| Zhu, Z. et al., Adv. Funct. Mater. 24, 7357–7365 (2014)            | 2014 | TiO2    | mTiO2    | MAPbI3      | two-step | spin-dip | no            | DMF      | spiro-OMeTAD | Li+TBP | 13.6 |
| Adli, H. K. et al., J. Phys. Chem. C 119, 22304–22309 (2015)       | 2015 | TiO2    | mTiO2    | MAPbI3      | two-step | spin-dip | no            | DMF      | spiro-OMeTAD | Li+TBP | 8.8  |
| Aharon, S. et al., J. Mater. Chem. A 3, 9171–9178 (2015)           | 2015 | TiO2    | mTiO2    | MAPbI3      | two-step | spin-dip | no            | DMF      | no           | no     | 7.7  |
| Aharon, S. et al., J. Mater. Chem. A 3, 9171–9178 (2015)           | 2015 | TiO2    | mTiO2    | FAPbI3      | two-step | spin-dip | no            | DMF      | no           | no     | 3.9  |
| Ahn, N. et al., J. Am. Chem. Soc. 137, 8696–8699 (2015)            | 2015 | TiO2    | mTiO2    | MAPbI3      | one-step | spin     | diethyl ether | DMF+DMSO | spiro-OMeTAD | Li+TBP | 19.7 |
| Bansode, U. et al., J. Phys. Chem. C 119, 9177–9185 (2015)         | 2015 | ZnO     | 0        | MAPbI3-xClx | one-step | PLD      | no            | na       | spiro-OMeTAD | Li+TBP | 7.7  |
| Bera, A. et al., ACS Appl. Mater. Interfaces 7, 12404–12411 (2015) | 2015 | Zn2SnO4 | mZn2SnO4 | MAPbI3-xClx | one-step | spin     | no            | DMF      | spiro-OMeTAD | Li+TBP | 13.3 |
| Bera, A. et al., ACS Appl. Mater. Interfaces 7, 12404–12411 (2015) | 2015 | TiO2    | mZn2SnO4 | MAPbI3-xClx | one-step | spin     | no            | DMF      | spiro-OMeTAD | Li+TBP | 7.1  |
| Bi, H. and Zhang, Y., Mater. Lett. 161, 767–769 (2015)             | 2015 | TiO2    | mTiO2    | MAPbI3-xClx | one-step | spin     | no            | DMF      | PCBM         | no     | 5.1  |
| Bi, H. and Zhang, Y., Mater. Lett. 161, 767–769 (2015)             | 2015 | TiO2    | mTiO2    | MAPbI3-xClx | one-step | spin     | no            | DMF      | PCBM         | Li+TBP | 9.7  |

|                                                                      |      |      |       |                            |          |          |               |          |              |        |      |
|----------------------------------------------------------------------|------|------|-------|----------------------------|----------|----------|---------------|----------|--------------|--------|------|
| Bi, D. et al., ACS Photonics 2, 589–594 (2015)                       | 2015 | TiO2 | mTiO2 | MAPbI3                     | two-step | spin-dip | no            | DMF      | spiro-OMeTAD | Li+TBP | 13.9 |
| Bu, L. et al., ACS Appl. Mater. Interfaces 7, 17776–17781 (2015)     | 2015 | TiO2 | mTiO2 | MAPbI3                     | two-step | spin-dip | no            | DMF      | spiro-OMeTAD | Li+TBP | 13.4 |
| Bu, L. et al., ACS Appl. Mater. Interfaces 7, 17776–17781 (2015)     | 2015 | TiO2 | mTiO2 | MAPbI3                     | two-step | spin-dip | no            | DMF      | spiro-OMeTAD | Li+TBP | 10.1 |
| Cai, B. et al., Chinese J. Catal. 36, 1183–1190 (2015)               | 2015 | TiO2 | 0     | MAPbI3                     | one-step | spin 2-3 | chlorobenzene | DMF      | spiro-OMeTAD | Li+TBP | 7.9  |
| Cai, B. et al., Cuihua Xuebao/Chinese J. Catal. 36, 1183–1190 (2015) | 2015 | TiO2 | 0     | MAPbI3                     | one-step | spin 2-3 | chlorobenzene | DMF+DMSO | spiro-OMeTAD | Li+TBP | 16.5 |
| Cai, B. et al., Chinese J. Catal. 36, 1183–1190 (2015)               | 2015 | TiO2 | 0     | MAPbI3                     | one-step | spin 2-3 | chlorobenzene | DMSO     | spiro-OMeTAD | Li+TBP | 15.1 |
| Cai, B. et al., Chinese J. Catal. 36, 1183–1190 (2015)               | 2015 | TiO2 | 0     | MAPbI3                     | one-step | spin 2-3 | chlorobenzene | DMSO+GBL | spiro-OMeTAD | Li+TBP | 14.1 |
| Cai, B. et al., Chinese J. Catal. 36, 1183–1190 (2015)               | 2015 | TiO2 | 0     | MAPbI3                     | one-step | spin 2-3 | chlorobenzene | GBL      | spiro-OMeTAD | Li+TBP | 9    |
| Cao, D. H. et al., J. Am. Chem. Soc. 137, 7843–7850 (2015)           | 2015 | TiO2 | mTiO2 | (CH3(CH2)3NH3)2(MA)2Pb3I10 | one-step | spin     | no            | DMF      | no           | no     | 3.5  |
| Cao, D. H. et al., J. Am. Chem. Soc. 137, 7843–7850 (2015)           | 2015 | TiO2 | mTiO2 | MAPbI3                     | one-step | spin     | no            | DMF      | spiro-OMeTAD | Li+TBP | 2.4  |



|                                                                      |      |                  |                                 |                                                                                                                                   |          |                  |    |         |              |          |      |
|----------------------------------------------------------------------|------|------------------|---------------------------------|-----------------------------------------------------------------------------------------------------------------------------------|----------|------------------|----|---------|--------------|----------|------|
| Cao, D. H. et al., J. Am. Chem. Soc. 137, 7843–7850 (2015)           | 2015 | TiO <sub>2</sub> | mTiO <sub>2</sub>               | (CH <sub>3</sub> (CH <sub>2</sub> ) <sub>3</sub> NH <sub>3</sub> ) <sub>2</sub> (MA) <sub>2</sub> Pb <sub>3</sub> I <sub>10</sub> | one-step | spin             | no | DMF     | spiro-OMeTAD | Li+TBP   | 4    |
| Cao, K. et al., Nano Energy 17, 171–179 (2015)                       | 2015 | TiO <sub>2</sub> | mAl <sub>2</sub> O <sub>3</sub> | MAPbI <sub>3</sub>                                                                                                                | two-step | infiltration-dip | no | DMF     | no           | no       | 15   |
| Cao, K. et al., Nano Energy 17, 171–179 (2015)                       | 2015 | TiO <sub>2</sub> | mAl <sub>2</sub> O <sub>3</sub> | MAPbI <sub>3</sub>                                                                                                                | two-step | infiltration-dip | no | DMF     | no           | no       | 11.2 |
| Cao, J. et al., J. Am. Chem. Soc. 137, 10914–10917 (2015)            | 2015 | TiO <sub>2</sub> | 0                               | MAPbI <sub>3</sub>                                                                                                                | two-step | spin-dip         | no | DMF     | TSHBC        | no       | 12.8 |
| Cao, J. et al., J. Am. Chem. Soc. 137, 10914–10917 (2015)            | 2015 | TiO <sub>2</sub> | 0                               | MAPbI <sub>3</sub>                                                                                                                | two-step | spin-dip         | no | DMF     | TSHBC        | graphene | 14   |
| Casaluci, S. et al., J. Power Sources 297, 504–510 (2015)            | 2015 | TiO <sub>2</sub> | 0                               | MAPbI <sub>3</sub>                                                                                                                | two-step | vasp             | no | DMF     | spiro-OMeTAD | Li+TBP   | 12.7 |
| Casaluci, S. et al., J. Power Sources 297, 504–510 (2015)            | 2015 | TiO <sub>2</sub> | mTiO <sub>2</sub>               | MAPbI <sub>3</sub>                                                                                                                | two-step | vasp             | no | DMF     | spiro-OMeTAD | Li+TBP   | 10   |
| Casaluci, S. et al., J. Power Sources 297, 504–510 (2015)            | 2015 | TiO <sub>2</sub> | 0                               | MAPbI <sub>3</sub>                                                                                                                | two-step | vasp             | no | DMSO    | spiro-OMeTAD | Li+TBP   | 11   |
| Chang, C. Y. et al., ACS Appl. Mater. Interfaces 7, 4955–4961 (2015) | 2015 | TiO <sub>2</sub> | 0                               | MAPbI <sub>3</sub> -xClx                                                                                                          | one-step | spin             | no | DMF     | spiro-OMeTAD | Li+TBP   | 10.6 |
| Chang, C. Y. et al., ACS Appl. Mater. Interfaces 7, 4955–4961 (2015) | 2015 | TiO <sub>2</sub> | 0                               | MAPbI <sub>3</sub> -xClx                                                                                                          | one-step | spin             | no | DMF+PEG | spiro-OMeTAD | Li+TBP   | 13.2 |

|                                                                     |      |      |       |        |          |                        |    |     |              |              |      |
|---------------------------------------------------------------------|------|------|-------|--------|----------|------------------------|----|-----|--------------|--------------|------|
| Chen, H. et al., Nano Energy 15, 216–226 (2015)                     | 2015 | TiO2 | mTiO2 | MAPbI3 | two-step | spin-dip               | no | DMF | no           | no           | 10.4 |
| Chen, H. et al., Nano Energy 15, 216–226 (2015)                     | 2015 | TiO2 | mTiO2 | MAPbI3 | two-step | electrode position-dip | no | na  | no           | no           | 10.2 |
| Chen, B. et al., Nano Energy 13, 582–591 (2015)                     | 2015 | TiO2 | 0     | MAPbI3 | two-step | spin                   | no | DMF | no           | no           | 0.3  |
| Chen, B. et al., Nano Energy 13, 582–591 (2015)                     | 2015 | TiO2 | 0     | MAPbI3 | two-step | spin                   | no | DMF | spiro-OMeTAD | Li+TBP+FK209 | 13.5 |
| Chen, B. et al., Nano Energy 13, 582–591 (2015)                     | 2015 | TiO2 | mTiO2 | MAPbI3 | two-step | spin                   | no | DMF | spiro-OMeTAD | Li+TBP+FK209 | 13   |
| Cheng, Y. et al., ACS Appl. Mater. Interfaces 7, 19986–19993 (2015) | 2015 | ZnO  | 0     | MAPbI3 | two-step | spin                   | no | DMF | spiro-OMeTAD | Li+TBP       | 2.9  |
| Cheng, Y. et al., ACS Appl. Mater. Interfaces 7, 19986–19993 (2015) | 2015 | ZnO  | 0     | MAPbI3 | two-step | spin                   | no | DMF | spiro-OMeTAD | Li+TBP       | 5.4  |
| Cheng, Y. et al., ACS Appl. Mater. Interfaces 7, 19986–19993 (2015) | 2015 | ZnO  | PEI   | MAPbI3 | two-step | spin                   | no | DMF | spiro-OMeTAD | Li+TBP       | 10.2 |
| Cheng, Y. et al., ACS Appl. Mater. Interfaces 7, 19986–19993 (2015) | 2015 | ZnO  | PCBM  | MAPbI3 | two-step | spin                   | no | DMF | spiro-OMeTAD | Li+TBP       | 6.4  |

|                                                                |      |      |       |             |          |          |    |     |              |        |      |
|----------------------------------------------------------------|------|------|-------|-------------|----------|----------|----|-----|--------------|--------|------|
| Cheng, M. et al., Chem. Mater. 27, 1808–1814 (2015)            | 2015 | TiO2 | mTiO2 | MAPbI3      | two-step | spin-dip | no | DMF | POZ2         | no     | 12.8 |
| Cheng, M. et al., Chem. Mater. 27, 1808–1814 (2015)            | 2015 | TiO2 | mTiO2 | MAPbI3      | two-step | spin-dip | no | DMF | POZ3         | no     | 11.5 |
| Cheng, M. et al., Chem. Mater. 27, 1808–1814 (2015)            | 2015 | TiO2 | mTiO2 | MAPbI3      | two-step | spin-dip | no | DMF | spiro-OMeTAD | Li+TBP | 12.8 |
| Dao, V. D. et al., Thin Solid Films 593, 10–16 (2015)          | 2015 | TiO2 | 0     | MAPbI3      | one-step | spin     | no | GBL | spiro-OMeTAD | Li+TBP | 2.3  |
| Dao, V. D. et al., Thin Solid Films 593, 10–16 (2015)          | 2015 | TiO2 | mTiO2 | MAPbI3      | one-step | spin     | no | GBL | spiro-OMeTAD | Li+TBP | 5.2  |
| Das, S. et al., ACS Photonics 2, 680–686 (2015)                | 2015 | TiO2 | 0     | MAPbI3-xClx | one-step | spin     | no | DMF | spiro-OMeTAD | Li+TBP | 13   |
| Das, S. et al., ACS Photonics 2, 680–686 (2015)                | 2015 | TiO2 | 0     | MAPbI3-xClx | one-step | spray    | no | DMF | spiro-OMeTAD | Li+TBP | 13   |
| Dong, Q. et al., J. Phys. Chem. C 119, 10212–10217 (2015)      | 2015 | SnO2 | mTiO2 | MAPbI3      | two-step | spin-dip | no | na  | spiro-OMeTAD | Li+TBP | 7.3  |
| Dong, Q. et al., J. Phys. Chem. C 119, 10212–10217 (2015)      | 2015 | TiO2 | mTiO2 | MAPbI3      | two-step | spin-dip | no | na  | spiro-OMeTAD | Li+TBP | 13.9 |
| Du, T. et al., ACS Appl. Mater. Interfaces 7, 3382–3388 (2015) | 2015 | TiO2 | 0     | MAPbI3      | two-step | spin-dip | no | DMF | spiro-OMeTAD | Li+TBP | 5.8  |
| Du, T. et al., ACS Appl. Mater. Interfaces 7, 3382–3388 (2015) | 2015 | TiO2 | 0     | MAPbI3      | two-step | vasp     | no | DMF | spiro-OMeTAD | Li+TBP | 8.1  |

|                                                              |      |      |       |             |          |          |    |     |              |        |      |
|--------------------------------------------------------------|------|------|-------|-------------|----------|----------|----|-----|--------------|--------|------|
| Fakharuddin, A. et al., J. Power Sources 283, 61–67 (2015)   | 2015 | TiO2 | 0     | MAPbI3-xClx | one-step | spin     | no | DMF | spiro-OMeTAD | Li+TBP | 12.1 |
| Fakharuddin, A. et al., J. Power Sources 283, 61–67 (2015)   | 2015 | TiO2 | TiO2  | MAPbI3-xClx | one-step | spin     | no | DMF | spiro-OMeTAD | Li+TBP | 12.2 |
| Fakharuddin, A. et al., ACS Nano 9, 8420–8429 (2015)         | 2015 | TiO2 | 0     | MAPbI3-xClx | one-step | spin 2-3 | no | DMF | spiro-OMeTAD | Li+TBP | 5.8  |
| Fakharuddin, A. et al., ACS Nano 9, 8420–8429 (2015)         | 2015 | TiO2 | mTiO2 | MAPbI3-xClx | one-step | spin 2-3 | no | DMF | spiro-OMeTAD | Li+TBP | 7.9  |
| Fakharuddin, A. et al., ACS Nano 9, 8420–8429 (2015)         | 2015 | 0    | TiO2  | MAPbI3-xClx | one-step | spin 2-3 | no | DMF | spiro-OMeTAD | Li+TBP | 10.5 |
| Garnier, S. et al., J. Phys. Chem. C 119, 19722–19728 (2015) | 2015 | TiO2 | 0     | MAPbI3      | one-step | spray    | no | DMF | no           | no     | 6.9  |
| Della Gaspera, E. et al., Nano Energy 13, 249–257 (2015)     | 2015 | TiO2 | 0     | MAPbI3      | one-step | spin     | no | DMF | spiro-OMeTAD | Li+TBP | 13.6 |
| Della Gaspera, E. et al., Nano Energy 13, 249–257 (2015)     | 2015 | TiO2 | 0     | MAPbI3      | one-step | spin     | no | DMF | spiro-OMeTAD | Li+TBP | 1.2  |
| Di Giacomo, F. et al., Adv. Energy Mater. 5, 1401808 (2015)  | 2015 | TiO2 | 0     | MAPbI3-xClx | one-step | spin     | no | DMF | spiro-OMeTAD | Li+TBP | 7    |
| Di Giacomo, F. et al., Adv. Energy Mater. 5, 1401808 (2015)  | 2015 | 0    | mTiO2 | MAPbI3-xClx | one-step | spin     | no | DMF | spiro-OMeTAD | Li+TBP | 2.2  |
| Di Giacomo, F. et al., Adv. Energy Mater. 5, 1401808 (2015)  | 2015 | TiO2 | mTiO2 | MAPbI3-xClx | one-step | spin     | no | DMF | spiro-OMeTAD | Li+TBP | 9.9  |

|                                                                             |      |      |                 |             |          |          |    |     |              |                                |      |
|-----------------------------------------------------------------------------|------|------|-----------------|-------------|----------|----------|----|-----|--------------|--------------------------------|------|
| Gu, Z. et al., Sol. Energy Mater. Sol. Cells<br>140, 396–404<br>(2015)      | 2015 | 0    | CdS-<br>nanorod | MAPbI3      | one-step | spin     | no | GBL | no           | no                             | 8.36 |
| Gu, Z. et al., Sol. Energy Mater. Sol. Cells<br>140, 396–404<br>(2015)      | 2015 | 0    | CdS-<br>nanorod | MAPbI3      | one-step | spin     | no | GBL | P3HT         | no                             | 1    |
| Gu, Z. et al., Sol. Energy Mater. Sol. Cells<br>140, 396–404<br>(2015)      | 2015 | 0    | CdS-<br>nanorod | MAPbI3      | one-step | spin     | no | GBL | spiro-OMeTAD | Li+TBP                         | 8.4  |
| Guarnera, S. et al., J. Phys. Chem. Lett. 6,<br>432–437 (2015)              | 2015 | TiO2 | 0               | MAPbI3-xClx | one-step | spin     | no | DMF | spiro-OMeTAD | H-<br>TFSI+Et4N-<br>TFSI       | 10.3 |
| Guarnera, S. et al., J. Phys. Chem. Lett. 6,<br>432–437 (2015)              | 2015 | TiO2 | mAl2O3          | MAPbI3-xClx | one-step | spin     | no | DMF | spiro-OMeTAD | H-<br>TFSI+Et4N-<br>TFSI+Al2O3 | 13.1 |
| Han, G. S. et al., ACS Appl. Mater. Interfaces<br>7, 23521–<br>23526 (2015) | 2015 | TiO2 | mTiO2           | MAPbI3      | two-step | spin     | no | DMF | spiro-OMeTAD | Li+TBP                         | 12.4 |
| Han, G. S. et al., ACS Appl. Mater. Interfaces<br>7, 23521–<br>23526 (2015) | 2015 | TiO2 | mTiO2           | MAPbI3      | two-step | spin     | no | DMF | spiro-OMeTAD | Li+TBP                         | 14.5 |
| Han, G. S. et al., J. Mater. Chem. A 3, 9160–<br>9164 (2015)                | 2015 | TiO2 | mTiO2           | MAPbI3      | two-step | spin-dip | no | DMF | spiro-OMeTAD | Li+TBP                         | 12.7 |
| Han, G. S. et al., J. Mater. Chem. A 3,<br>9160–9164 (2015)                 | 2015 | TiO2 | mTiO2           | MAPbI3      | two-step | spin-dip | no | DMF | spiro-OMeTAD | Li+TBP                         | 11.4 |

|                                                           |      |      |        |        |          |          |               |           |              |        |      |
|-----------------------------------------------------------|------|------|--------|--------|----------|----------|---------------|-----------|--------------|--------|------|
| Hao, F. et al., J. Am. Chem. Soc. 137, 11445–11452 (2015) | 2015 | TiO2 | mTiO2  | MAPbI3 | two-step | spin-dip | no            | DMF       | no           | no     | 5.8  |
| Hao, F. et al., J. Am. Chem. Soc. 137, 11445–11452 (2015) | 2015 | TiO2 | mTiO2  | MAPbI3 | one-step | spin     | no            | DMSO+SnF2 | no           | no     | 3.2  |
| Heo, J. H. et al., Nano Energy 15, 530–539 (2015)         | 2015 | TiO2 | 0      | MAPbI3 | one-step | spin 2-3 | no            | GBL       | PTAA         | Li+TBP | 5.7  |
| Heo, J. H. et al., Nano Energy 15, 530–539 (2015)         | 2015 | TiO2 | 0      | MAPbI3 | one-step | spin 2-3 | no            | GBL       | PTAA         | Li+TBP | 5    |
| Heo, J. H. et al., Nano Energy 15, 530–539 (2015)         | 2015 | TiO2 | mAl2O3 | MAPbI3 | one-step | spin 2-3 | no            | GBL       | PTAA         | Li+TBP | 3.2  |
| Heo, J. H. et al., Nano Energy 15, 530–539 (2015)         | 2015 | TiO2 | mTiO2  | MAPbI3 | one-step | spin 2-3 | no            | GBL       | PTAA         | Li+TBP | 15.7 |
| Heo, J. H. et al., Nano Energy 15, 530–539 (2015)         | 2015 | TiO2 | mTiO2  | MAPbI3 | one-step | spin 2-3 | no            | GBL       | PTAA         | Li+TBP | 17.2 |
| Hong, S. et al., Curr. Appl. Phys. 15, 574–579 (2015)     | 2015 | TiO2 | mTiO2  | MAPbI3 | two-step | spin-dip | no            | DMF       | spiro-OMeTAD | Li+TBP | 12.8 |
| Hou, Y. et al., Adv. Energy Mater. 5, 1500543 (2015)      | 2015 | TiO2 | 0      | MAPbI3 | one-step | spin     | chlorobenzene | DMF+DMSO  | PEDOT        | no     | 14.2 |
| Hou, Y. et al., Adv. Energy Mater. 5, 1500543 (2015)      | 2015 | TiO2 | 0      | MAPbI3 | one-step | spin     | chlorobenzene | DMF+DMSO  | spiro-OMeTAD | Li+TBP | 16.4 |
| Hou, Y. et al., Adv. Energy Mater. 5, 1500543 (2015)      | 2015 | TiO2 | 0      | MAPbI3 | one-step | spin     | chlorobenzene | DMF+DMSO  | PEDOT        | no     | 11.2 |

|                                                                     |      |      |       |             |          |          |    |          |              |        |      |
|---------------------------------------------------------------------|------|------|-------|-------------|----------|----------|----|----------|--------------|--------|------|
| Huang, W. et al., Adv. Funct. Mater. 25, 5529–5536 (2015)           | 2015 | TiO2 | 0     | MAPbI3      | one-step | spin     | no | DMF      | spiro-OMeTAD | Li+TBP | 14.3 |
| Huang, W. et al., Adv. Funct. Mater. 25, 5529–5536 (2015)           | 2015 | TiO2 | mTiO2 | MAPbI3      | one-step | spin     | no | DMF      | spiro-OMeTAD | Li+TBP | 12   |
| Huang, L. et al., Sol. Energy Mater. Sol. Cells 141, 377–382 (2015) | 2015 | TiO2 | 0     | MAPbI3-xClx | one-step | spin     | no | DMF      | spiro-OMeTAD | Li+TBP | 13.6 |
| Huang, L. et al., Sol. Energy Mater. Sol. Cells 141, 377–382 (2015) | 2015 | TiO2 | 0     | MAPbI3-xClx | one-step | spin     | no | DMF      | spiro-OMeTAD | Li+TBP | 8.7  |
| Huangfu, M. et al., Appl. Surf. Sci. 357, 2234–2240 (2015)          | 2015 | TiO2 | mTiO2 | MAPbI3-xClx | one-step | spin     | no | DMF      | CuI          | no     | 5.8  |
| Hwang, K. et al., Adv. Mater. 27, 1241–1247 (2015)                  | 2015 | ZnO  | 0     | MAPbI3      | two-step | slot-die | no | DMF      | P3HT         | Li+TBP | 12   |
| Hwang, I. et al., ACS Appl. Mater. Interfaces 7, 17330–17336 (2015) | 2015 | TiO2 | mTiO2 | MAPbI3      | two-step | spin-dip | no | DMF      | spiro-OMeTAD | Li+TBP | 11.8 |
| Hwang, I. et al., ACS Appl. Mater. Interfaces 7, 17330–17336 (2015) | 2015 | TiO2 | mTiO2 | MAPbI3      | two-step | spin-dip | no | DMF      | spiro-OMeTAD | Li+TBP | 11.3 |
| Ito, S. et al., J. Phys. Chem. Lett. 6, 881–886 (2015)              | 2015 | TiO2 | 0     | MAPbI3      | two-step | spin     | no | DMF+DMSO | CuSCN        | no     | 7.2  |
| Ito, S. et al., J. Phys. Chem. Lett. 6, 881–886 (2015)              | 2015 | TiO2 | mTiO2 | MAPbI3      | two-step | spin     | no | DMF+DMSO | CuSCN        | no     | 12   |

|                                                                             |      |      |       |                                   |          |          |         |          |              |                  |      |
|-----------------------------------------------------------------------------|------|------|-------|-----------------------------------|----------|----------|---------|----------|--------------|------------------|------|
| Ito, S. et al., J. Phys. Chem. Lett. 6, 881–886 (2015)                      | 2015 | TiO2 | 0     | MAPbI3                            | two-step | spin-dip | no      | DMF+DMSO | CuSCN        | no               | 0.1  |
| Ito, S. et al., J. Phys. Chem. Lett. 6, 881–886 (2015)                      | 2015 | TiO2 | mTiO2 | MAPbI3                            | two-step | spin-dip | no      | DMF+DMSO | CuSCN        | no               | 9.9  |
| Jeon, N. J. et al., Nature 517, 476–480 (2015)                              | 2015 | TiO2 | mTiO2 | (FAPbI3)0.8<br>5<br>(MAPbBr3)0.15 | one-step | spin 2-3 | toluene | DMSO+GBL | PTAA         | Li+TBP           | 19   |
| Jeong, I. et al., Nano Energy 17, 131–139 (2015)                            | 2015 | TiO2 | mTiO2 | MAPbI3                            | two-step | spin     | no      | DMF      | spiro-OMeTAD | Li+TBP           | 15.1 |
| Jiang, C. et al., ACS Appl. Mater. Interfaces 7, 24726–24732 (2015)         | 2015 | TiO2 | mTiO2 | MAPbI3                            | two-step | spin-dip | no      | DMF      | spiro-OMeTAD | Li+TBP           | 13.8 |
| Jiang, C. et al., ACS Appl. Mater. Interfaces 7, 24726–24732 (2015)         | 2015 | TiO2 | mTiO2 | MAPbI3                            | two-step | spin-dip | no      | DMF      | spiro-OMeTAD | Li+TBP           | 15.6 |
| Jin, Y. and Chumanov, G., ACS Appl. Mater. Interfaces 7, 12015–12021 (2015) | 2015 | ZnO  | 0     | MAPbI3                            | two-step | spin-dip | no      | DMF      | no           | no               | 10.2 |
| Kang, M. S. et al., ACS Appl. Mater. Interfaces 7, 22213–22217 (2015)       | 2015 | TiO2 | mTiO2 | MAPbI3                            | two-step | spin-dip | no      | DMF      | SGT-411      | Li+TBP+FK<br>209 | 13   |
| Kang, M. S. et al., ACS Appl. Mater. Interfaces 7, 22213–22217 (2015)       | 2015 | TiO2 | mTiO2 | MAPbI3                            | two-step | spin-dip | no      | DMF      | SGT-41no     | Li+TBP+FK<br>209 | 12.6 |



|                                                                              |      |                  |                   |                                    |          |                  |               |          |              |                  |      |
|------------------------------------------------------------------------------|------|------------------|-------------------|------------------------------------|----------|------------------|---------------|----------|--------------|------------------|------|
| Kang, M. S. et al., ACS Appl. Mater. Interfaces<br>7, 22213–<br>22217 (2015) | 2015 | TiO <sub>2</sub> | mTiO <sub>2</sub> | MAPbI <sub>3</sub>                 | two-step | spin-dip         | no            | DMF      | SGT-4no9     | Li+TBP+FK<br>209 | 11   |
| Kang, M. S. et al., ACS Appl. Mater. Interfaces<br>7, 22213–<br>22217 (2015) | 2015 | TiO <sub>2</sub> | mTiO <sub>2</sub> | MAPbI <sub>3</sub>                 | two-step | spin-dip         | no            | DMF      | spiro-OMeTAD | Li+TBP+FK<br>209 | 13.8 |
| Ke, W. et al., J. Am. Chem. Soc. 137,<br>6730–6733 (2015)                    | 2015 | SnO <sub>2</sub> | 0                 | MAPbI <sub>3</sub>                 | two-step | spin 2-3-<br>dip | no            | DMF      | spiro-OMeTAD | Li+TBP+FK<br>102 | 17.2 |
| Ke, W. et al., J. Am. Chem. Soc. 137,<br>6730–6733 (2015)                    | 2015 | TiO <sub>2</sub> | 0                 | MAPbI <sub>3</sub>                 | two-step | spin 2-3-<br>dip | no            | DMF      | spiro-OMeTAD | Li+TBP+FK<br>102 | 15.2 |
| Kim, G. Y. et al., J. Phys. Chem. Lett. 6,<br>2355–2362 (2015)               | 2015 | TiO <sub>2</sub> | mTiO <sub>2</sub> | MAPbI <sub>3</sub>                 | one-step | spin             | no            | DMSO+GBL | spiro-OMeTAD | Li+TBP           | 10.6 |
| Kim, G. Y. et al., J. Phys. Chem. Lett. 6,2355–<br>2362 (2015)               | 2015 | TiO <sub>2</sub> | mTiO <sub>2</sub> | MAPbI <sub>3</sub> -<br>xBrx       | one-step | spin             | no            | DMSO+GBL | spiro-OMeTAD | Li+TBP           | 13.6 |
| Lee, J. W. et al., Adv. Energy Mater. 5,<br>1501310 (2015)                   | 2015 | TiO <sub>2</sub> | 0                 | FAPbI <sub>3</sub>                 | one-step | spin             | diethyl ether | DMF+DMSO | spiro-OMeTAD | Li+TBP           | 17.4 |
| Lee, J. W. et al., Adv. Energy Mater. 5,<br>1501310 (2015)                   | 2015 | TiO <sub>2</sub> | 0                 | FA0.9Cs0.1<br>P<br>bI <sub>3</sub> | one-step | spin             | diethyl ether | DMF+DMSO | spiro-OMeTAD | Li+TBP           | 19   |
| Li, F. et al., Mater. Lett. 157, 38–41<br>(2015)                             | 2015 | TiO <sub>2</sub> | mTiO <sub>2</sub> | MAPbI <sub>3</sub>                 | two-step | spin-dip         | no            | DMF      | spiro-OMeTAD | Li+TBP           | 10.2 |
| Li, F. et al., Mater. Lett. 157, 38–41<br>(2015)                             | 2015 | TiO <sub>2</sub> | mTiO <sub>2</sub> | MAPbI <sub>3</sub>                 | two-step | spin-<br>spray   | no            | DMF      | spiro-OMeTAD | Li+TBP           | 12.5 |

|                                                                  |      |      |              |             |          |          |    |          |              |              |      |
|------------------------------------------------------------------|------|------|--------------|-------------|----------|----------|----|----------|--------------|--------------|------|
| Li, W. et al., J. Am. Chem. Soc. 137, 10399–10405 (2015)         | 2015 | TiO2 | mTiO2        | MAPbI3      | two-step | spin     | no | DMF      | spiro-OMeTAD | Li+TBP       | 13.6 |
| Li, W. et al., J. Am. Chem. Soc. 137, 10399–10405 (2015)         | 2015 | TiO2 | mTiO2        | MAPbI3      | two-step | spin     | no | DMF+DMSO | spiro-OMeTAD | Li+TBP       | 17.2 |
| Li, Y. et al., J. Phys. Chem. Lett. 6, 493–499 (2015)            | 2015 | TiO2 | 0            | MAPbI3      | two-step | vasp     | no | DMF      | spiro-OMeTAD | Li+TBP       | 14.8 |
| Li, Y. et al., J. Phys. Chem. Lett. 6, 493–499 (2015)            | 2015 | TiO2 | 0            | MAPbI3-xClx | two-step | vasp     | no | DMF      | spiro-OMeTAD | Li+TBP       | 12.1 |
| Li, Y. et al., J. Phys. Chem. Lett. 6, 493–499 (2015)            | 2015 | TiO2 | 0            | MAPbI3-xClx | two-step | vasp     | no | DMF      | spiro-OMeTAD | Li+TBP       | 16.8 |
| Li, Y. et al., J. Phys. Chem. Lett. 6, 493–499 (2015)            | 2015 | TiO2 | 0            | MAPbI3-xClx | two-step | vasp     | no | DMF      | spiro-OMeTAD | Li+TBP       | 3.4  |
| Li, Y. et al., RSC Adv. 5, 28424–28429 (2015)                    | 2015 | SnO2 | mSnO2        | MAPbI3      | two-step | spin     | no | DMF      | spiro-OMeTAD | Li+TBP       | 10.8 |
| Li, Y. et al., J. Am. Chem. Soc. 137, 15540–15547 (2015)         | 2015 | TiO2 | 0            | MAPbI3-xClx | two-step | spin     | no | DMF      | spiro-OMeTAD | Li+TBP       | 14.4 |
| Li, Y. et al., J. Am. Chem. Soc. 137, 15540–15547 (2015)         | 2015 | TiO2 | PCBB-2CN-2C8 | MAPbI3-xClx | two-step | spin     | no | DMF      | spiro-OMeTAD | Li+TBP       | 17.4 |
| Li, C. et al., ACS Appl. Mater. Interfaces 7, 15117–15122 (2015) | 2015 | TiO2 | 0            | MAPbI3      | two-step | spin-dip | no | DMF      | spiro-OMeTAD | Li+TBP+FK102 | 10.7 |
| Li, C. et al., ACS Appl. Mater. Interfaces 7, 15117–             | 2015 | TiO2 | 0            | MAPbI3      | two-step | spin-dip | no | DMF      | spiro-OMeTAD | Li+TBP+FK102 | 10.7 |

|                                                                   |      |      |        |             |          |          |    |     |              |        |      |  |
|-------------------------------------------------------------------|------|------|--------|-------------|----------|----------|----|-----|--------------|--------|------|--|
| 15122 (2015)                                                      |      |      |        |             |          |          |    |     |              |        |      |  |
| Listorti, A. et al., J. Phys. Chem. Lett. 6, 1628–1637 (2015)     | 2015 | TiO2 | 0      | MAPbI3-xClx | one-step | spin     | no | DMF | spiro-OMeTAD | Li+TBP | 9.3  |  |
| Listorti, A. et al., J. Phys. Chem. Lett. 6, 1628–1637 (2015)     | 2015 | TiO2 | mAl2O3 | MAPbI3-xClx | one-step | spin     | no | DMF | spiro-OMeTAD | Li+TBP | 9.8  |  |
| Listorti, A. et al., J. Phys. Chem. Lett. 6, 1628–1637 (2015)     | 2015 | TiO2 | mTiO2  | MAPbI3-xClx | one-step | spin     | no | DMF | spiro-OMeTAD | Li+TBP | 8.7  |  |
| Liu, D. et al., ACS Appl. Mater. Interfaces 7, 16330–16337 (2015) | 2015 | TiO2 | mTiO2  | MAPbI3-xClx | one-step | spin-TSA | no | DMF | spiro-OMeTAD | Li+TBP | 14.1 |  |
| Liu, D. et al., ACS Appl. Mater. Interfaces 7, 16330–16337 (2015) | 2015 | TiO2 | mTiO2  | MAPbI3-xClx | one-step | spin-OTA | no | DMF | spiro-OMeTAD | Li+TBP | 9    |  |
| Liu, D. et al., ACS Appl. Mater. Interfaces 7, 16330–16337 (2015) | 2015 | TiO2 | mTiO2  | MAPbI3-xClx | one-step | spin-OSA | no | DMF | spiro-OMeTAD | Li+TBP | 10.2 |  |
| Liu, J. et al., J. Phys. Chem. Lett. 6, 1666–1673 (2015)          | 2015 | TiO2 | mAl2O3 | MAPbI3-xClx | one-step | spin     | no | DMF | no           | no     | 6.5  |  |
| Liu, J. et al., J. Phys. Chem. Lett. 6, 1666–1673 (2015)          | 2015 | TiO2 | mAl2O3 | MAPbI3-xClx | one-step | spin     | no | DMF | PEDOT        | no     | 14.5 |  |
| Liu, J. et al., J. Phys. Chem. Lett. 6, 1666–1673 (2015)          | 2015 | TiO2 | mAl2O3 | MAPbI3-xClx | one-step | spin     | no | DMF | spiro-OMeTAD | Li+TBP | 12.6 |  |

|                                                                 |      |      |       |        |          |          |         |          |              |        |      |
|-----------------------------------------------------------------|------|------|-------|--------|----------|----------|---------|----------|--------------|--------|------|
| Liu, C. et al., ACS Appl. Mater. Interfaces 7, 1153–1159 (2015) | 2015 | TiO2 | 0     | MAPbI3 | two-step | spin     | no      | DMF      | P3HT         | no     | 7.1  |
| Liu, C. et al., ACS Appl. Mater. Interfaces 7, 1153–1159 (2015) | 2015 | TiO2 | PCBM  | MAPbI3 | two-step | spin     | no      | DMF      | P3HT         | no     | 14.6 |
| Liu, C. et al., ACS Appl. Mater. Interfaces 7, 1153–1159 (2015) | 2015 | TiO2 | PCBM  | MAPbI3 | two-step | spin     | no      | DMF      | P3HT         | no     | 13.2 |
| Liu, C. et al., ACS Appl. Mater. Interfaces 7, 9066–9071 (2015) | 2015 | TiO2 | 0     | MAPbI3 | two-step | vasp     | no      | DMF      | spiro-OMeTAD | Li+TBP | 10.2 |
| Liu, C. et al., ACS Appl. Mater. Interfaces 7, 9066–9071 (2015) | 2015 | TiO2 | mTiO2 | MAPbI3 | two-step | vasp     | no      | DMF      | spiro-OMeTAD | Li+TBP | 7.7  |
| Liu, J. et al., J. Mater. Chem. A 3, 11750–11755 (2015)         | 2015 | TiO2 | 0     | MAPbI3 | one-step | spin     | toluene | DMSO+GBL | spiro-OMeTAD | Li+TBP | 12.8 |
| Liu, J. et al., J. Mater. Chem. A 3, 11750–11755 (2015)         | 2015 | CdS  | 0     | MAPbI3 | one-step | spin     | toluene | DMSO+GBL | spiro-OMeTAD | Li+TBP | 11.2 |
| Liu, J. et al., J. Mater. Chem. A 3, 11750–11755 (2015)         | 2015 | ZnS  | 0     | MAPbI3 | one-step | spin     | toluene | DMSO+GBL | spiro-OMeTAD | Li+TBP | 1    |
| Liu, J. et al., J. Mater. Chem. A 3, 11750–11755 (2015)         | 2015 | no   | no    | MAPbI3 | one-step | spin     | toluene | DMSO+GBL | spiro-OMeTAD | Li+TBP | 3.6  |
| Liu, Z. et al., Dalton Trans. 44, 3967–3973 (2015)              | 2015 | TiO2 | mTiO2 | MAPbI3 | two-step | spin-dip | no      | DMF      | mNiO         | no     | 11.4 |

|                                                                        |      |      |       |        |          |          |    |     |              |        |      |
|------------------------------------------------------------------------|------|------|-------|--------|----------|----------|----|-----|--------------|--------|------|
| Liu, Z. et al., <i>Dalt. Trans.</i> 44, 3967–3973 (2015)               | 2015 | TiO2 | mTiO2 | MAPbI3 | two-step | spin-dip | no | DMF | ZrO2         | no     | 8.2  |
| Luo, Q. et al., <i>J. Mater. Chem. A</i> 3, 15996–16004 (2015)         | 2015 | TiO2 | mTiO2 | MAPbI3 | two-step | spin-dip | no | DMF | RGO-1        | no     | 9.3  |
| Luo, Q. et al., <i>J. Mater. Chem. A</i> 3, 15996–16004 (2015)         | 2015 | TiO2 | mTiO2 | MAPbI3 | two-step | spin-dip | no | DMF | RGO-2        | no     | 8.3  |
| Luo, Q. et al., <i>J. Mater. Chem. A</i> 3, 15996–16004 (2015)         | 2015 | TiO2 | mTiO2 | MAPbI3 | two-step | spin-dip | no | DMF | RGO-3        | no     | 7    |
| Luo, Q. et al., <i>J. Mater. Chem. A</i> 3, 15996–16004 (2015)         | 2015 | TiO2 | mTiO2 | MAPbI3 | two-step | spin-dip | no | DMF | GO           | no     | 5.5  |
| Luo, Q. et al., <i>J. Mater. Chem. A</i> 3, 15996–16004 (2015)         | 2015 | TiO2 | mTiO2 | MAPbI3 | two-step | spin-dip | no | DMF | spiro-OMeTAD | no     | 5.9  |
| Luo, Q. et al., <i>J. Mater. Chem. A</i> 3, 15996–16004 (2015)         | 2015 | TiO2 | mTiO2 | MAPbI3 | two-step | spin-dip | no | DMF | spiro-OMeTAD | Li+TBP | 13.3 |
| Luo, P. et al., <i>ACS Appl. Mater. Interfaces</i> 7, 2708–2714 (2015) | 2015 | TiO2 | 0     | MAPbI3 | two-step | vasp     | no | DMF | spiro-OMeTAD | Li+TBP | 3.6  |
| Luo, P. et al., <i>ACS Appl. Mater. Interfaces</i> 7, 2708–2714 (2015) | 2015 | TiO2 | 0     | MAPbI3 | two-step | vasp     | no | DMF | spiro-OMeTAD | Li+TBP | 10.5 |
| Luo, P. et al., <i>ACS Appl. Mater. Interfaces</i> 7, 2708–2714 (2015) | 2015 | TiO2 | 0     | MAPbI3 | two-step | vasp     | no | DMF | spiro-OMeTAD | Li+TBP | 12.7 |

|                                                                  |      |                  |                   |                          |          |          |    |     |                         |        |      |
|------------------------------------------------------------------|------|------------------|-------------------|--------------------------|----------|----------|----|-----|-------------------------|--------|------|
| Lv, M. et al., ACS Appl. Mater. Interfaces 7, 17482–17488 (2015) | 2015 | TiO <sub>2</sub> | mTiO <sub>2</sub> | MAPbI <sub>3</sub>       | two-step | spin     | no | DMF | no                      | no     | 5.7  |
| Lv, M. et al., ACS Appl. Mater. Interfaces 7, 17482–17488 (2015) | 2015 | TiO <sub>2</sub> | mTiO <sub>2</sub> | MAPbI <sub>3</sub>       | two-step | spin     | no | DMF | CuInS <sub>2</sub> /ZnS | no     | 8.4  |
| Lv, M. et al., ACS Appl. Mater. Interfaces 7, 17482–17488 (2015) | 2015 | TiO <sub>2</sub> | mTiO <sub>2</sub> | MAPbI <sub>3</sub>       | two-step | spin     | no | DMF | CuInS <sub>2</sub>      | no     | 6.6  |
| Lv, M. et al., ACS Appl. Mater. Interfaces 7, 17482–17488 (2015) | 2015 | TiO <sub>2</sub> | mTiO <sub>2</sub> | MAPbI <sub>3</sub>       | two-step | spin     | no | DMF | spiro-OMeTAD            | Li+TBP | 13.9 |
| Ma, Y. et al., ACS Appl. Mater. Interfaces 7, 6406–6411 (2015)   | 2015 | TiO <sub>2</sub> | 0                 | MAPbI <sub>3</sub> -xCIx | two-step | spin-dip | no | DMF | no                      | no     | 3.4  |
| Ma, Y. et al., ACS Appl. Mater. Interfaces 7, 6406–6411 (2015)   | 2015 | TiO <sub>2</sub> | 0                 | MAPbI <sub>3</sub> -xCIx | two-step | spin-dip | no | DMF | TPD                     | no     | 7.1  |
| Ma, Y. et al., ACS Appl. Mater. Interfaces 7, 6406–6411 (2015)   | 2015 | TiO <sub>2</sub> | 0                 | MAPbI <sub>3</sub> -xCIx | two-step | spin-dip | no | DMF | TPD                     | no     | 3.2  |
| Mahmood, K. et al., Adv. Energy Mater. 5, 1500568 (2015)         | 2015 | ZnO              | N-ZnO-nanorod     | MAPbI <sub>3</sub>       | two-step | spin     | no | DMF | spiro-OMeTAD            | Li+TBP | 16.2 |
| Mahmood, K. et al., Adv. Energy Mater. 5, 1500568 (2015)         | 2015 | ZnO              | ZnO-nanorod       | MAPbI <sub>3</sub>       | two-step | spin     | no | DMF | spiro-OMeTAD            | Li+TBP | 13.5 |
| Mali, S. S. et al., Chem. Mater. 27, 1541–1551 (2015)            | 2015 | TiO <sub>2</sub> | mTiO <sub>2</sub> | MAPbI <sub>3</sub>       | one-step | spin     | no | GBL | spiro-OMeTAD            | Li+TBP | 10   |

|                                                                         |      |      |       |             |          |           |    |     |              |        |      |
|-------------------------------------------------------------------------|------|------|-------|-------------|----------|-----------|----|-----|--------------|--------|------|
| Mali, S. S. et al., Chem. Mater. 27, 1541–1551 (2015)                   | 2015 | TiO2 | TiO2  | MAPbI3      | one-step | spin      | no | GBL | spiro-OMeTAD | Li+TBP | 13.8 |
| Mali, S. S. et al., Chem. Mater. 27, 1541–1551 (2015)                   | 2015 | TiO2 | TiO2  | MAPbI3      | one-step | spin      | no | GBL | spiro-OMeTAD | Li+TBP | 10   |
| Matteocci, F. et al., ACS Appl. Mater. Interfaces 7, 26176–26183 (2015) | 2015 | TiO2 | mTiO2 | MAPbI3-xClx | one-step | spin      | no | DMF | spiro-OMeTAD | Li+TBP | 7.4  |
| Matteocci, F. et al., ACS Appl. Mater. Interfaces 7, 26176–26183 (2015) | 2015 | TiO2 | mTiO2 | MAPbI3      | two-step | blade-dip | no | DMF | spiro-OMeTAD | Li+TBP | 11.9 |
| Matteocci, F. et al., ACS Appl. Mater. Interfaces 7, 26176–26183 (2015) | 2015 | TiO2 | mTiO2 | MAPbI3      | two-step | spin-dip  | no | DMF | spiro-OMeTAD | Li+TBP | 13.3 |
| Matteocci, F. et al., ACS Appl. Mater. Interfaces 7, 26176–26183 (2015) | 2015 | TiO2 | mTiO2 | MAPbI3      | two-step | vasp      | no | DMF | spiro-OMeTAD | Li+TBP | 9.7  |
| Nejand, B. A. et al., ACS Appl. Mater. Interfaces 7, 21807–21818 (2015) | 2015 | TiO2 | 0     | MAPbI3-xClx | one-step | spin      | no | DMF | NiOx         | no     | 1.3  |
| Nejand, B. A. et al., ACS Appl. Mater. Interfaces 7, 21807–21818 (2015) | 2015 | TiO2 | 0     | MAPbI3-xClx | one-step | spin      | no | DMF | spiro-OMeTAD | Li+TBP | 8.2  |
| Peng, Y. et al., J. Mater. Chem. A 3, 12436–12442 (2015)                | 2015 | TiO2 | mTiO2 | MAPbI3      | two-step | vasp      | no | DMF | spiro-OMeTAD | Li+TBP | 14.1 |
| Raga, S. R. et al., Chem. Mater. 27, 1597–1603 (2015)                   | 2015 | TiO2 | 0     | MAPbI3-xClx | one-step | spin      | no | DMF | spiro-OMeTAD | Li+TBP | 12.5 |

|                                                               |      |      |       |                            |          |           |               |          |              |                  |      |
|---------------------------------------------------------------|------|------|-------|----------------------------|----------|-----------|---------------|----------|--------------|------------------|------|
| Raga, S. R. et al., Chem. Mater. 27, 1597–1603 (2015)         | 2015 | TiO2 | 0     | MAPbI3-xClx                | one-step | spin      | no            | DMF      | spiro-OMeTAD | Li+TBP           | 9    |
| Raga, S. R. et al., Chem. Mater. 27, 1597–1603 (2015)         | 2015 | TiO2 | 0     | MAPbI3-xClx                | one-step | spin      | no            | DMF      | spiro-OMeTAD | Li+TBP           | 8.7  |
| Raga, S. R. et al., Chem. Mater. 27, 1597–1603 (2015)         | 2015 | TiO2 | 0     | MAPbI3-xClx                | one-step | spin      | no            | DMF      | spiro-OMeTAD | Li+TBP           | 12.1 |
| Raga, S. R. et al., Chem. Mater. 27, 1597–1603 (2015)         | 2015 | TiO2 | 0     | MAPbI3-xClx                | one-step | spin      | no            | DMF      | spiro-OMeTAD | Li+TBP           | 8.3  |
| Rakstys, K. et al., J. Am. Chem. Soc. 137, 16172–16178 (2015) | 2015 | TiO2 | mTiO2 | (FAPbI3)0.8<br>5 (MAPbBr3) | one-step | spin 2-3  | chlorobenzene | DMF+DMSO | KR131        | Li+TBP+FK<br>209 | 18.3 |
| Rakstys, K. et al., J. Am. Chem. Soc. 137, 16172–16178 (2015) | 2015 | TiO2 | mTiO2 | (FAPbI3)0.8<br>5 (MAPbBr3) | one-step | spin 2-3  | chlorobenzene | DMF+DMSO | KR133        | Li+TBP+FK<br>209 | 16.8 |
| Rakstys, K. et al., J. Am. Chem. Soc. 137, 16172–16178 (2015) | 2015 | TiO2 | mTiO2 | (FAPbI3)0.8<br>5 (MAPbBr3) | one-step | spin 2-3  | chlorobenzene | DMF+DMSO | KR145        | Li+TBP+FK<br>209 | 11.9 |
| Rakstys, K. et al., J. Am. Chem. Soc. 137, 16172–16178 (2015) | 2015 | TiO2 | mTiO2 | (FAPbI3)0.8<br>5 (MAPbBr3) | one-step | spin 2-3  | chlorobenzene | DMF+DMSO | KR122        | Li+TBP+FK<br>209 | 9    |
| Rakstys, K. et al., J. Am. Chem. Soc. 137, 16172–16178 (2015) | 2015 | TiO2 | mTiO2 | (FAPbI3)0.8<br>5 (MAPbBr3) | one-step | spin 2-3  | chlorobenzene | DMF+DMSO | spiro-OMeTAD | Li+TBP+FK<br>209 | 17.9 |
| Razza, S. et al., J. Power Sources 277, 286–291 (2015)        | 2015 | TiO2 | mTiO2 | MAPbI3                     | two-step | blade-dip | no            | DMF      | spiro-OMeTAD | Li+TBP           | 13.3 |
| Razza, S. et al., J. Power Sources 277, 286–291 (2015)        | 2015 | TiO2 | mTiO2 | MAPbI3                     | two-step | spin-dip  | no            | DMF      | spiro-OMeTAD | Li+TBP           | 13   |



|                                                                   |      |      |       |               |          |              |         |           |              |        |      |
|-------------------------------------------------------------------|------|------|-------|---------------|----------|--------------|---------|-----------|--------------|--------|------|
| Sabba, D. et al., J. Phys. Chem. C 119, 1763–1767 (2015)          | 2015 | TiO2 | mTiO2 | CsSnI2.9Br0.1 | one-step | spin         | no      | DMSO+SnF2 | spiro-OMeTAD | Li+TBP | 1.8  |
| Sabba, D. et al., J. Phys. Chem. C 119, 1763–1767 (2015)          | 2015 | TiO2 | mTiO2 | CsSnI3        | one-step | spin         | no      | DMSO+SnF2 | spiro-OMeTAD | Li+TBP | 1.7  |
| Sabba, D. et al., J. Phys. Chem. C 119, 1763–1767 (2015)          | 2015 | TiO2 | mTiO2 | CsSnBr3       | one-step | spin         | no      | DMSO+SnF2 | spiro-OMeTAD | Li+TBP | 1    |
| Seol, D. J. et al., ChemSusChem 8, 2414–2419 (2015)               | 2015 | TiO2 | 0     | FAPbI3        | two-step | spin 2-3-dip | no      | DMF       | spiro-OMeTAD | Li+TBP | 12.2 |
| Sepalage, G. A. et al., Adv. Funct. Mater. 25, 5650–5661 (2015)   | 2015 | TiO2 | 0     | MAPbI3        | one-step | spin         | no      | DMF       | CuI          | no     | 7.5  |
| Sepalage, G. A. et al., Adv. Funct. Mater. 25, 5650–5661 (2015)   | 2015 | TiO2 | 0     | MAPbI3        | one-step | spin         | no      | DMF       | CuI          | no     | 1.1  |
| Sepalage, G. A. et al., Adv. Funct. Mater. 25, 5650–5661 (2015)   | 2015 | TiO2 | 0     | MAPbI3        | one-step | spin         | no      | DMF       | spiro-OMeTAD | Li+TBP | 15.8 |
| Sepalage, G. A. et al., Adv. Funct. Mater. 25, 5650–5661 (2015)   | 2015 | TiO2 | 0     | MAPbI3        | one-step | spin         | no      | DMF       | spiro-OMeTAD | Li+TBP | 10.1 |
| Sfyri, G. et al., Sol. Energy Mater. Sol. Cells 134, 60–63 (2015) | 2015 | TiO2 | mTiO2 | MAPbI3-xClx   | one-step | spin         | no      | DMF       | spiro-OMeTAD | no     | 2.8  |
| Shen, P. S. et al., Sol. Energy 120, 345–356 (2015)               | 2015 | TiO2 | mTiO2 | MAPbI3        | one-step | spin 2-3     | toluene | DMSO+GBL  | spiro-OMeTAD | Li+TBP | 11.8 |

|                                                             |      |      |             |             |          |              |    |      |              |        |      |
|-------------------------------------------------------------|------|------|-------------|-------------|----------|--------------|----|------|--------------|--------|------|
| Shi, Y. et al., J. Phys. Chem. C 119, 15868–15873 (2015)    | 2015 | TiO2 | 0           | MAPbI3-xClx | one-step | spin 2-3     | no | DMF  | spiro-OMeTAD | Li+TBP | 12.7 |
| Shi, Y. et al., J. Phys. Chem. C 119, 15868–15873 (2015)    | 2015 | TiO2 | mTiO2       | MAPbI3-xClx | one-step | spin 2-3     | no | DMF  | spiro-OMeTAD | Li+TBP | 7.9  |
| Shi, Y. et al., J. Phys. Chem. C 119, 15868–15873 (2015)    | 2015 | TiO2 | 0           | MAPbI3      | two-step | spin-dip     | no | DMF  | spiro-OMeTAD | Li+TBP | 6.8  |
| Shi, Y. et al., J. Phys. Chem. C 119, 15868–15873 (2015)    | 2015 | TiO2 | mTiO2       | MAPbI3      | two-step | spin-dip     | no | DMF  | spiro-OMeTAD | Li+TBP | 14.1 |
| Son, D. Y. et al., J. Phys. Chem. C 119, 10321–10328 (2015) | 2015 | 0    | ZnO-nanorod | MAPbI3      | two-step | spin         | no | DMF  | spiro-OMeTAD | Li+TBP | 14.4 |
| Son, D. Y. et al., J. Phys. Chem. C 119, 10321–10328 (2015) | 2015 | 0    | ZnO-nanorod | MAPbI3      | two-step | spin         | no | DMF  | spiro-OMeTAD | Li+TBP | 11.7 |
| Song, D. et al., J. Phys. Chem. C 119, 22812–22819 (2015)   | 2015 | TiO2 | 0           | MAPbI3      | two-step | spin 2-3-dip | no | DMSO | spiro-OMeTAD | Li+TBP | 16.4 |
| Song, D. et al., J. Phys. Chem. C 119, 22812–22819 (2015)   | 2015 | TiO2 | 0           | MAPbI3      | two-step | spin 2-3-dip | no | DMSO | spiro-OMeTAD | Li+TBP | 17.5 |
| Song, D. et al., J. Phys. Chem. C 119, 22812–22819 (2015)   | 2015 | TiO2 | 0           | MAPbI3      | two-step | spin 2-3-dip | no | DMSO | spiro-OMeTAD | Li+TBP | 16   |
| Song, D. et al., J. Phys. Chem. C 119, 22812–22819 (2015)   | 2015 | TiO2 | 0           | MAPbI3      | two-step | spin 2-3-dip | no | DMSO | spiro-OMeTAD | Li+TBP | 15.4 |
| Song, D. et al., J. Phys. Chem. C 119, 22812–22819 (2015)   | 2015 | TiO2 | 0           | MAPbI3      | two-step | spin 2-3-dip | no | DMSO | spiro-OMeTAD | Li+TBP | 6    |

|                                                                   |      |      |       |             |          |          |    |     |              |        |      |
|-------------------------------------------------------------------|------|------|-------|-------------|----------|----------|----|-----|--------------|--------|------|
| Song, T. B. et al., Nano Energy 12, 494–500 (2015)                | 2015 | TiO2 | 0     | MAPbI3-xClx | one-step | spin     | no | DMF | spiro-OMeTAD | Li+TBP | 12.9 |
| Song, T. B. et al., Nano Energy 12, 494–500 (2015)                | 2015 | TiO2 | 0     | MAPbI3-xClx | one-step | spin     | no | DMF | spiro-OMeTAD | Li+TBP | 13.9 |
| Song, T. B. et al., Nano Energy 12, 494–500 (2015)                | 2015 | TiO2 | 0     | MAPbI3-xClx | one-step | spin     | no | DMF | spiro-OMeTAD | Li+TBP | 14.1 |
| Song, T. B. et al., Nano Energy 12, 494–500 (2015)                | 2015 | TiO2 | 0     | MAPbI3-xClx | one-step | spin     | no | DMF | spiro-OMeTAD | Li+TBP | 14   |
| Song, T. B. et al., Nano Energy 12, 494–500 (2015)                | 2015 | TiO2 | 0     | MAPbI3-xClx | one-step | spin     | no | DMF | spiro-OMeTAD | Li+TBP | 13   |
| Sun, H. et al, Solid State Sci. 40, 60–66 (2015)                  | 2015 | TiO2 | 0     | MAPbI3      | one-step | spin     | no | GBL | no           | no     | 3.5  |
| Sun, H. et al, Solid State Sci. 40, 60–66 (2015)                  | 2015 | TiO2 | TiO2  | MAPbI3      | one-step | spin     | no | GBL | no           | no     | 4.3  |
| Sun, C. et al., Sol. Energy Mater. Sol. Cells 143, 360–368 (2015) | 2015 | TiO2 | mTiO2 | MAPbI3      | two-step | spin-dip | no | DMF | spiro-OMeTAD | Li+TBP | 9.9  |
| Sung, S. et al., Nanoscale 7, 8898–8906 (2015)                    | 2015 | TiO2 | mTiO2 | MAPbI3      | two-step | spin-dip | no | DMF | spiro-OMeTAD | Li+TBP | 17.2 |
| Tao, H. et al., J. Power Sources 290, 144–152 (2015)              | 2015 | TiO2 | mTiO2 | MAPbI3      | two-step | spin-dip | no | DMF | spiro-OMeTAD | Li+TBP | 9.6  |
| Tao, H. et al., J. Power Sources 290, 144–152 (2015)              | 2015 | 0    | TiO2  | MAPbI3      | two-step | spin-dip | no | DMF | spiro-OMeTAD | Li+TBP | 12.8 |

|                                                                              |      |                  |                   |                                      |          |          |    |                        |              |        |      |
|------------------------------------------------------------------------------|------|------------------|-------------------|--------------------------------------|----------|----------|----|------------------------|--------------|--------|------|
| Tripathi, B. et al., Sol. Energy Mater. Sol. Cells<br>132, 615–622<br>(2015) | 2015 | TiO <sub>2</sub> | mTiO <sub>2</sub> | MAPbI <sub>3</sub>                   | one-step | spin     | no | GBL                    | no           | no     | 1.1  |
| Tripathi, B. et al., Sol. Energy Mater. Sol. Cells<br>132, 615–622<br>(2015) | 2015 | TiO <sub>2</sub> | mTiO <sub>2</sub> | MAPbI <sub>3</sub>                   | one-step | spin     | no | GBL                    | no           | no     | 0.9  |
| Tripathi, B. et al., Sol. Energy Mater. Sol. Cells<br>132, 615–622<br>(2015) | 2015 | TiO <sub>2</sub> | mTiO <sub>2</sub> | MAPbI <sub>3</sub>                   | one-step | spin     | no | GBL                    | no           | no     | 0.3  |
| Wang, Z. et al., Chem. Mater. 27,<br>7149–7155 (2015)                        | 2015 | TiO <sub>2</sub> | mTiO <sub>2</sub> | FAPbI <sub>3</sub> +<br>FACl         | one-step | spin     | no | DMF                    | spiro-OMeTAD | Li+TBP | 13.7 |
| Wang, Z. et al., Chem. Mater. 27,<br>7149–7155 (2015)                        | 2015 | TiO <sub>2</sub> | mTiO <sub>2</sub> | FAPbI <sub>3</sub>                   | one-step | spin     | no | DMF                    | spiro-OMeTAD | Li+TBP | 0.2  |
| Wang, Z. et al., Chem. Mater. 27,<br>7149–7155 (2015)                        | 2015 | TiO <sub>2</sub> | mTiO <sub>2</sub> | FAPbI <sub>3</sub>                   | one-step | spin     | no | DMF+MACl               | spiro-OMeTAD | Li+TBP | 7    |
| Wang, Z. et al., Chem. Mater. 27,<br>7149–7155 (2015)                        | 2015 | TiO <sub>2</sub> | mTiO <sub>2</sub> | FAPbI <sub>3</sub>                   | one-step | spin     | no | DMF+NH <sub>4</sub> Cl | spiro-OMeTAD | Li+TBP | 0.6  |
| Wang, M. et al., Chem. Phys. Lett.<br>639, 283–288 (2015)                    | 2015 | ZnO              | ZnO-<br>nanorod   | MAPbI <sub>3</sub>                   | two-step | spin-dip | no | DMF+DMSO               | spiro-OMeTAD | Li+TBP | 6.6  |
| Wang, M. et al., Chem. Phys. Lett. 639, 283–<br>288 (2015)                   | 2015 | ZnO              | ZnO-<br>nanorod   | MAPbI <sub>3</sub>                   | two-step | spin-dip | no | DMF+DMSO               | spiro-OMeTAD | Li+TBP | 4.3  |
| Wang, J. Y. et al., ACS Appl. Mater. Interfaces<br>7, 27676–<br>27684 (2015) | 2015 | TiO <sub>2</sub> | 0                 | MAPbI <sub>3</sub> -xCl <sub>x</sub> | one-step | spin     | no | DMF                    | P3HT         | no     | 10.7 |

|                                                                       |      |                  |                   |                          |          |              |    |         |              |                 |      |
|-----------------------------------------------------------------------|------|------------------|-------------------|--------------------------|----------|--------------|----|---------|--------------|-----------------|------|
| Wang, J. Y. et al., ACS Appl. Mater. Interfaces 7, 27676–27684 (2015) | 2015 | TiO <sub>2</sub> | 0                 | MAPbI <sub>3</sub> -xClx | one-step | spin         | no | DMF     | P3HT         | no              | 8.7  |
| Wang, H. et al., ACS Photonics 2, 849–855 (2015)                      | 2015 | TiO <sub>2</sub> | mTiO <sub>2</sub> | MAPbI <sub>3</sub> -xClx | one-step | spin         | no | DMF     | Rno1         | Li+TBP          | 7.5  |
| Wang, H. et al., ACS Photonics 2, 849–855 (2015)                      | 2015 | TiO <sub>2</sub> | mTiO <sub>2</sub> | MAPbI <sub>3</sub> -xClx | one-step | spin         | no | DMF     | spiro-OMeTAD | Li+TBP          | 7.7  |
| Wang, H. et al., ACS Photonics 2, 849–855 (2015)                      | 2015 | TiO <sub>2</sub> | mTiO <sub>2</sub> | MAPbI <sub>3</sub> -xClx | one-step | spin         | no | DMF     | Rno1         | Li+TBP+MY<br>11 | 12   |
| Wang, H. et al., ACS Photonics 2, 849–855 (2015)                      | 2015 | TiO <sub>2</sub> | mTiO <sub>2</sub> | MAPbI <sub>3</sub> -xClx | one-step | spin         | no | DMF     | spiro-OMeTAD | Li+TBP+MY<br>11 | 12.2 |
| Wang, F. et al., Adv. Funct. Mater. 25, 1120–1126 (2015)              | 2015 | TiO <sub>2</sub> | 0                 | FAPbI <sub>3</sub>       | one-step | spin         | no | DMF     | spiro-OMeTAD | Li+TBP          | 6.1  |
| Wang, F. et al., Adv. Funct. Mater. 25, 1120–1126 (2015)              | 2015 | TiO <sub>2</sub> | 0                 | FAPbI <sub>3</sub>       | one-step | spin         | no | DMF+HCl | spiro-OMeTAD | Li+TBP          | 17.5 |
| Wang, F. et al., Adv. Funct. Mater. 25, 1120–1126 (2015)              | 2015 | TiO <sub>2</sub> | 0                 | FAPbI <sub>3</sub>       | one-step | spin         | no | DMF+HI  | spiro-OMeTAD | Li+TBP          | 12.4 |
| Wang, K. et al., J. Phys. Chem. Lett. 6, 755–759 (2015)               | 2015 | TiO <sub>2</sub> | 0                 | MAPbI <sub>3</sub> -xClx | one-step | spin         | no | DMF     | spiro-OMeTAD | Li+TBP          | 9.6  |
| Wang, K. et al., J. Phys. Chem. Lett. 6, 755–759 (2015)               | 2015 | WO <sub>x</sub>  | 0                 | MAPbI <sub>3</sub> -xClx | one-step | spin         | no | DMF     | spiro-OMeTAD | Li+TBP          | 9.4  |
| Wei, H. et al., Carbon 93, 861–868 (2015)                             | 2015 | TiO <sub>2</sub> | 0                 | MAPbI <sub>3</sub>       | two-step | spin 2-3-dip | no | DMF     | no           | no              | 13.5 |

|                                                                      |      |      |        |             |          |              |         |          |              |        |      |
|----------------------------------------------------------------------|------|------|--------|-------------|----------|--------------|---------|----------|--------------|--------|------|
| Wei, H. et al., Carbon 93, 861–868 (2015)                            | 2015 | TiO2 | 0      | MAPbI3      | two-step | spin 2-3-dip | no      | DMF      | no           | no     | 10.7 |
| Werner, J. et al., Sol. Energy Mater. Sol. Cells 141, 407–413 (2015) | 2015 | TiO2 | mTiO2  | MAPbI3      | one-step | spin 2-3     | toluene | DMSO+GBL | spiro-OMeTAD | Li+TBP | 12.2 |
| Werner, J. et al., Sol. Energy Mater. Sol. Cells 141, 407–413 (2015) | 2015 | TiO2 | mTiO2  | MAPbI3      | one-step | spin 2-3     | toluene | DMSO+GBL | spiro-OMeTAD | Li+TBP | 10.4 |
| Wojciechowski, K. et al., J. Phys. Chem. Lett. 6, 2399–2405 (2015)   | 2015 | C60  | mAl2O3 | MAPbI3-xClx | one-step | spin         | no      | DMF      | spiro-OMeTAD | Li+TBP | 13.5 |
| Wojciechowski, K. et al., J. Phys. Chem. Lett. 6, 2399–2405 (2015)   | 2015 | TiO2 | mAl2O3 | MAPbI3-xClx | one-step | spin         | no      | DMF      | spiro-OMeTAD | Li+TBP | 13.9 |
| Wojciechowski, K. et al., J. Phys. Chem. Lett. 6, 2399–2405 (2015)   | 2015 | C60  | 0      | MAPbI3-xClx | two-step | evap-spin    | no      | DMF      | spiro-OMeTAD | Li+TBP | 14.5 |
| Wojciechowski, K. et al., J. Phys. Chem. Lett. 6, 2399–2405 (2015)   | 2015 | TiO2 | 0      | MAPbI3-xClx | two-step | evap-spin    | no      | DMF      | spiro-OMeTAD | Li+TBP | 13.6 |
| Wozny, S. et al., Chem. Mater. 27, 4814–4820 (2015)                  | 2015 | TiO2 | 0      | FAPbI3      | one-step | spin 2-3     | toluene | DMF      | spiro-OMeTAD | Li+TBP | 13.5 |
| Wozny, S. et al., Chem. Mater. 27, 4814–4820 (2015)                  | 2015 | TiO2 | 0      | FAPbI3      | one-step | spin 2-3     | toluene | DMF      | spiro-OMeTAD | Li+TBP | 13   |
| Wozny, S. et al., Chem. Mater. 27, 4814–4820 (2015)                  | 2015 | TiO2 | 0      | FAPbI3      | one-step | spin 2-3     | toluene | DMF      | spiro-OMeTAD | Li+TBP | 10.3 |

|                                                                   |      |      |       |             |          |              |         |      |              |               |      |
|-------------------------------------------------------------------|------|------|-------|-------------|----------|--------------|---------|------|--------------|---------------|------|
| Wozny, S. et al., Chem. Mater. 27, 4814–4820 (2015)               | 2015 | TiO2 | 0     | FAPbI3      | one-step | spin 2-3     | toluene | DMF  | spiro-OMeTAD | Li+TBP        | 16.6 |
| Wu, Y. et al., ACS Appl. Mater. Interfaces 7, 20707–20713 (2015)  | 2015 | TiO2 | mTiO2 | MAPbI3      | one-step | spin 2-3     | toluene | DMSO | spiro-OMeTAD | Li+TBP+FK 102 | 16   |
| Wu, N. et al., Appl. Surf. Sci. 357, 2372–2377 (2015)             | 2015 | TiO2 | 0     | MAPbI3-xClx | two-step | vasp         | no      | DMF  | spiro-OMeTAD | Li+TBP        | 11.1 |
| Xia, X. et al., ACS Appl. Mater. Interfaces 7, 16907–16912 (2015) | 2015 | TiO2 | mTiO2 | MAPbI3      | two-step | spin-spray   | no      | DMF  | spiro-OMeTAD | Li+TBP        | 16.2 |
| Xie, Y. et al., ACS Appl. Mater. Interfaces 7, 12937–12942 (2015) | 2015 | TiO2 | mTiO2 | MAPbI3      | two-step | spin-dip     | no      | DMF  | spiro-OMeTAD | Li+TBP        | 13.4 |
| Xie, Y. et al., ACS Appl. Mater. Interfaces 7, 12937–12942 (2015) | 2015 | TiO2 | mTiO2 | MAPbI3      | two-step | spin-dip     | no      | DMF  | spiro-OMeTAD | Li+TBP        | 11.1 |
| Xu, X. et al., Nano Lett. 15, 6514–6520 (2015)                    | 2015 | TiO2 | 0     | Cl-FAPbI3   | two-step | spin         | no      | na   | spiro-OMeTAD | Li+TBP        | 15.3 |
| Xu, X. et al., Nano Lett. 15, 6514–6520 (2015)                    | 2015 | no   | no    | Cl-FAPbI3   | two-step | spin         | no      | na   | spiro-OMeTAD | Li+TBP        | 15.5 |
| Yang, Z. et al., Nano Energy 15, 670–678 (2015)                   | 2015 | TiO2 | 0     | MAPbI3      | two-step | spin-contact | no      | DMF  | spiro-OMeTAD | Li+TBP        | 16   |
| Yang, Y. and Wang, W., J. Power Sources 293, 577–584 (2015)       | 2015 | 0    | mTiO2 | MAPbI3      | one-step | spin         | no      | DMF  | P3HT         | Li+TBP        | 4.9  |

|                                                                           |      |      |       |             |          |          |    |          |              |        |      |
|---------------------------------------------------------------------------|------|------|-------|-------------|----------|----------|----|----------|--------------|--------|------|
| Yang, Y. and Wang, W., J. Power Sources<br>293, 577–<br>584 (2015)        | 2015 | 0    | mTiO2 | MAPbI3      | one-step | spin     | no | DMF      | P3HT         | Li+TBP | 1.9  |
| Yang, D. et al., Energy Environ. Sci. 8, 3208–<br>3214<br>(2015)          | 2015 | TiO2 | 0     | MAPbI3-xClx | two-step | CVD      | no | na       | spiro-OMeTAD | Li+TBP | 16.2 |
| Yang, W. S. et al., Science 348, 1234–<br>1237 (2015)                     | 2015 | TiO2 | mTiO2 | FAPbI3      | two-step | spin     | no | DMF      | PTAA         | Li+TBP | 15.6 |
| Yang, W. S. et al., Science 348, 1234–<br>1237 (2015)                     | 2015 | TiO2 | mTiO2 | FAPbI3      | two-step | spin     | no | DMF+DMSO | PTAA         | Li+TBP | 20.1 |
| Yang, L. et al., ACS Appl. Mater.<br>Interfaces 7, 14614–<br>14619 (2015) | 2015 | TiO2 | 0     | MAPbI3      | two-step | spin-dip | no | DMF      | spiro-OMeTAD | Li+TBP | 9.4  |
| Yang, L. et al., ACS Appl. Mater.<br>Interfaces 7, 14614–<br>14619 (2015) | 2015 | TiO2 | 0     | MAPbI3      | two-step | spin-dip | no | DMF+HCl  | spiro-OMeTAD | Li+TBP | 15.2 |
| Yang, L. et al., ACS Appl. Mater.<br>Interfaces 7, 14614–<br>14619 (2015) | 2015 | TiO2 | 0     | MAPbI3      | two-step | spin-dip | no | DMF+HI   | spiro-OMeTAD | Li+TBP | 12.2 |
| You, P. et al., Adv. Mater. 27, 3632–<br>3638 (2015)                      | 2015 | TiO2 | 0     | MAPbI3-xClx | one-step | spin     | no | DMF      | spiro-OMeTAD | Li+TBP | 14.6 |
| You, P. et al., Adv. Mater. 27, 3632–<br>3638 (2015)                      | 2015 | TiO2 | 0     | MAPbI3-xClx | one-step | spin     | no | DMF      | spiro-OMeTAD | Li+TBP | 12.4 |
| Yu, J. C. et al., Adv. Mater. 27, 3492–<br>3500 (2015)                    | 2015 | TiO2 | 0     | MAPbI3-xClx | one-step | spin     | no | DMF      | spiro-OMeTAD | Li+TBP | 16.3 |



|                                                                      |      |      |       |             |          |          |               |     |              |                  |      |
|----------------------------------------------------------------------|------|------|-------|-------------|----------|----------|---------------|-----|--------------|------------------|------|
| Yu, J. C. et al., Adv. Mater. 27, 3492–3500 (2015)                   | 2015 | TiO2 | 0     | MAPbI3-xClx | one-step | spin     | no            | DMF | spiro-OMeTAD | Li+TBP           | 12.8 |
| Yue, Y. et al., J. Phys. Chem. C 119, 22847–22854 (2015)             | 2015 | TiO2 | mTiO2 | MAPbI3      | two-step | spin-dip | no            | DMF | spiro-OMeTAD | Li+TBP+FK<br>209 | 13.1 |
| Yue, Y. et al., J. Phys. Chem. C 119, 22847–22854 (2015)             | 2015 | TiO2 | mTiO2 | MAPbI3      | two-step | spin-dip | no            | DMF | spiro-OMeTAD | Li+TBP+FK<br>209 | 5.3  |
| Yue, Y. et al., J. Phys. Chem. C 119, 22847–22854 (2015)             | 2015 | TiO2 | mTiO2 | MAPbI3      | two-step | spin-dip | no            | DMF | spiro-OMeTAD | Li+TBP+FK<br>209 | 14   |
| Yue, Y. et al., J. Phys. Chem. C 119, 22847–22854 (2015)             | 2015 | TiO2 | mTiO2 | MAPbI3      | two-step | spin-dip | no            | DMF | spiro-OMeTAD | Li+TBP+FK<br>209 | 8    |
| Zhang, T. et al., Nano Lett. 15, 3959–3963 (2015)                    | 2015 | TiO2 | 0     | MAPbI3      | two-step | spin-dip | no            | DMF | spiro-OMeTAD | Li+TBP           | 17.2 |
| Zhang, T. et al., Nano Lett. 15, 3959–3963 (2015)                    | 2015 | TiO2 | 0     | MAPbI3      | two-step | spin-dip | no            | DMF | spiro-OMeTAD | Li+TBP           | 6.4  |
| Zhang, J. and Pauporté, T., J. Phys. Chem. C 119, 14919–14928 (2015) | 2015 | TiO2 | 0     | MAPbI3      | one-step | spin 2-3 | chlorobenzene | DMF | spiro-OMeTAD | Li+TBP           | 6.7  |
| Zhang, J. and Pauporté, T., J. Phys. Chem. C 119, 14919–14928 (2015) | 2015 | ZnO  | 0     | MAPbI3      | one-step | spin 2-3 | chlorobenzene | DMF | spiro-OMeTAD | Li+TBP           | 15   |
| Zhang, J. and Pauporté, T., J. Phys. Chem. C 119, 14919–14928 (2015) | 2015 | TiO2 | mTiO2 | MAPbI3      | one-step | spin 2-3 | chlorobenzene | DMF | spiro-OMeTAD | Li+TBP           | 9.4  |
| Zhang, J. and Pauporté, T., J. Phys. Chem. C 119, 14919–14928 (2015) | 2015 | TiO2 | 0     | MAPbI3      | two-step | spin-dip | no            | DMF | spiro-OMeTAD | Li+TBP           | 3.8  |

|                                                                      |      |      |       |             |          |          |         |          |              |               |      |
|----------------------------------------------------------------------|------|------|-------|-------------|----------|----------|---------|----------|--------------|---------------|------|
| Zhang, J. and Pauporté, T., J. Phys. Chem. C 119, 14919–14928 (2015) | 2015 | ZnO  | 0     | MAPbI3      | two-step | spin-dip | no      | DMF      | spiro-OMeTAD | Li+TBP        | 10.9 |
| Zhang, J. and Pauporté, T., J. Phys. Chem. C 119, 14919–14928 (2015) | 2015 | TiO2 | mTiO2 | MAPbI3      | two-step | spin-dip | no      | DMF      | spiro-OMeTAD | Li+TBP        | 6.3  |
| Zhang, H. et al., J. Energy Chem. 24, 729–735 (2015)                 | 2015 | TiO2 | mTiO2 | MAPbI3      | two-step | spin-dip | no      | DMF      | spiro-OMeTAD | Li+TBP        | 16.1 |
| Zhang, M. et al., Chem. Commun. 51, 10038–10041 (2015)               | 2015 | TiO2 | 0     | MAPbBr3     | one-step | blowdry  | no      | DMF      | P3HT         | no            | 10.2 |
| Zhang, M. et al., Chem. Commun. 51, 10038–10041 (2015)               | 2015 | TiO2 | 0     | MAPbBr3     | one-step | spin     | no      | DMF      | P3HT         | no            | 4.8  |
| Zhang, Z. et al., Sol. Energy 122, 97–103 (2015)                     | 2015 | TiO2 | mTiO2 | MAPbI3      | two-step | spin     | no      | DMF+IPA  | spiro-OMeTAD | Li+TBP        | 12.2 |
| Zhang, Z. et al., Sol. Energy 122, 97–103 (2015)                     | 2015 | TiO2 | mTiO2 | MAPbI3      | two-step | spin-dip | no      | DMF+IPA  | spiro-OMeTAD | Li+TBP        | 12.5 |
| Zhang, Y. et al., J. Power Sources 274, 1224–1230 (2015)             | 2015 | TiO2 | mTiO2 | MAPbI3-xClx | one-step | spin     | no      | DMF      | no           | no            | 3.5  |
| Zhang, Y. et al., J. Power Sources 274, 1224–1230 (2015)             | 2015 | TiO2 | mTiO2 | MAPbI3-xClx | one-step | spin     | no      | DMF      | P3HT         | no            | 6.1  |
| Zheng, X. et al., Nano Energy 17, 269–278 (2015)                     | 2015 | TiO2 | mTiO2 | MAPbBr3     | one-step | spin 2-3 | toluene | DMF+DMSO | spiro-OMeTAD | Li+TBP+FK 209 | 8.3  |
| Zheng, Y. C. et al., Chem. Mater. 27, 5116–5121 (2015)               | 2015 | TiO2 | 0     | MAPbI3      | one-step | spin     | no      | DMF      | spiro-OMeTAD | Li+TBP        | 13.1 |

|                                                           |      |      |        |        |          |          |    |     |              |        |      |
|-----------------------------------------------------------|------|------|--------|--------|----------|----------|----|-----|--------------|--------|------|
| Zheng, Y. C. et al., Chem. Mater. 27, 5116–5121 (2015)    | 2015 | TiO2 | 0      | MAPbI3 | one-step | spin     | no | DMF | spiro-OMeTAD | Li+TBP | 1.6  |
| Zhong, D. et al., Nano Energy 11, 409–418 (2015)          | 2015 | TiO2 | mTiO2  | MAPbI3 | two-step | spin-dip | no | DMF | spiro-OMeTAD | Li+TBP | 11   |
| Zhong, D. et al., Nano Energy 11, 409–418 (2015)          | 2015 | TiO2 | TiO2   | MAPbI3 | two-step | spin-dip | no | DMF | spiro-OMeTAD | Li+TBP | 11.9 |
| Zhong, D. et al., Nano Energy 11, 409–418 (2015)          | 2015 | TiO2 | TiO2   | MAPbI3 | two-step | spin-dip | no | DMF | spiro-OMeTAD | Li+TBP | 10.1 |
| Zhou, Y. et al., J. Phys. Chem. Lett. 6, 2292–2297 (2015) | 2015 | TiO2 | 0      | MAPbI3 | two-step | spin     | no | DMF | spiro-OMeTAD | Li+TBP | 12.1 |
| Zhou, Y. et al., J. Phys. Chem. Lett. 6, 2292–2297 (2015) | 2015 | TiO2 | mTiO2  | MAPbI3 | two-step | spin     | no | DMF | spiro-OMeTAD | Li+TBP | 10.8 |
| Zhou, H. et al., J. Phys. Chem. C 119, 4600–4605 (2015)   | 2015 | ZnO  | 0      | MAPbI3 | two-step | spin-dip | no | DMF | no           | no     | 8.7  |
| Zhu, L. et al., Nano Energy 15, 540–548 (2015)            | 2015 | TiO2 | 0      | MAPbI3 | two-step | spin-dip | no | DMF | spiro-OMeTAD | no     | 14   |
| Zhu, L. et al., Nano Energy 15, 540–548 (2015)            | 2015 | TiO2 | mTiO2  | MAPbI3 | two-step | spin-dip | no | DMF | spiro-OMeTAD | no     | 17.4 |
| Zuo, L. et al., J. Am. Chem. Soc. 137, 2674–2679 (2015)   | 2015 | ZnO  | 0      | MAPbI3 | one-step | spin     | no | DMF | spiro-OMeTAD | Li     | 12   |
| Zuo, L. et al., J. Am. Chem. Soc. 137, 2674–2679 (2015)   | 2015 | ZnO  | C3-SAM | MAPbI3 | one-step | spin     | no | DMF | spiro-OMeTAD | Li     | 15.7 |

|                                                                         |      |                  |                   |                          |          |          |               |          |              |                  |      |
|-------------------------------------------------------------------------|------|------------------|-------------------|--------------------------|----------|----------|---------------|----------|--------------|------------------|------|
| Adhikari, N. et al., <i>Nanoscale</i> 8, 2693–2703 (2016)               | 2016 | TiO <sub>2</sub> | mTiO <sub>2</sub> | MAPbI <sub>3</sub>       | two-step | spin-dip | no            | DMF      | spiro-OMeTAD | Li+TBP           | 9.3  |
| Adhikari, N. et al., <i>Nanoscale</i> 8, 2693–2703 (2016)               | 2016 | TiO <sub>2</sub> | mTiO <sub>2</sub> | MAPbI <sub>3</sub>       | two-step | spin-dip | no            | DMF      | spiro-OMeTAD | Li+TBP           | 12.4 |
| Bae, S. et al., <i>J. Phys. Chem. Lett.</i> 7, 3091–3096 (2016)         | 2016 | TiO <sub>2</sub> | mTiO <sub>2</sub> | MAPbI <sub>3</sub>       | one-step | spin     | diethyl ether | DMF+DMSO | spiro-OMeTAD | Li+TBP           | 14.3 |
| Bai, S. et al., <i>Electrochim. Acta</i> 190, 775–779 (2016)            | 2016 | TiO <sub>2</sub> | mTiO <sub>2</sub> | MAPbI <sub>3</sub>       | two-step | spin     | no            | DMF      | no           | no               | 12.5 |
| Bai, S. et al., <i>Electrochim. Acta</i> 190, 775–779 (2016)            | 2016 | TiO <sub>2</sub> | mTiO <sub>2</sub> | FAPbI <sub>3</sub>       | two-step | spin     | no            | DMF      | no           | no               | 7.4  |
| Bai, S. et al., <i>Electrochim. Acta</i> 190, 775–779 (2016)            | 2016 | TiO <sub>2</sub> | mTiO <sub>2</sub> | FAxMA1-xPbI <sub>3</sub> | two-step | spin     | no            | DMF      | no           | no               | 13   |
| Bai, Y. et al., <i>ChemSusChem</i> 9, 2686–2691 (2016)                  | 2016 | SnO <sub>2</sub> | 0                 | MAPbI <sub>3</sub>       | one-step | spin     | no            | DMF      | spiro-OMeTAD | Li+TBP+FK<br>209 | 17.7 |
| Bai, Y. et al., <i>ChemSusChem</i> 9, 2686–2691 (2016)                  | 2016 | SnO <sub>2</sub> | 0                 | MAPbI <sub>3</sub>       | one-step | spin     | no            | DMF      | spiro-OMeTAD | Li+TBP+FK<br>209 | 15.7 |
| Behrouznejad, F. et al., <i>J. Mater. Chem. A</i> 4, 13488–13498 (2016) | 2016 | TiO <sub>2</sub> | mTiO <sub>2</sub> | MAPbI <sub>3</sub>       | one-step | spin     | chlorobenzene | DMF      | no           | no               | 3.1  |
| Behrouznejad, F. et al., <i>J. Mater. Chem. A</i> 4, 13488–13498 (2016) | 2016 | TiO <sub>2</sub> | mTiO <sub>2</sub> | MAPbI <sub>3</sub>       | one-step | spin     | chlorobenzene | DMF      | no           | no               | 2.6  |
| Behrouznejad, F. et al., <i>J. Mater. Chem. A</i> 4, 13488–13498        | 2016 | TiO <sub>2</sub> | mTiO <sub>2</sub> | MAPbI <sub>3</sub>       | one-step | spin     | chlorobenzene | DMF      | no           | no               | 0.2  |

|                                                                   |      |                  |                   |                                                     |          |          |               |          |              |               |      |  |
|-------------------------------------------------------------------|------|------------------|-------------------|-----------------------------------------------------|----------|----------|---------------|----------|--------------|---------------|------|--|
| (2016)                                                            |      |                  |                   |                                                     |          |          |               |          |              |               |      |  |
| Behrouznejad, F. et al., J. Mater. Chem. A 4, 13488–13498 (2016)  | 2016 | TiO <sub>2</sub> | mTiO <sub>2</sub> | MAPbI <sub>3</sub>                                  | one-step | spin     | chlorobenzene | DMF      | spiro-OMeTAD | Li+TBP        | 16.5 |  |
| Behrouznejad, F. et al., J. Mater. Chem. A 4, 13488–13498 (2016)  | 2016 | TiO <sub>2</sub> | mTiO <sub>2</sub> | MAPbI <sub>3</sub>                                  | one-step | spin     | chlorobenzene | DMF      | spiro-OMeTAD | Li+TBP        | 16.4 |  |
| Behrouznejad, F. et al., J. Mater. Chem. A 4, 13488–13498 (2016)  | 2016 | TiO <sub>2</sub> | mTiO <sub>2</sub> | MAPbI <sub>3</sub>                                  | one-step | spin     | chlorobenzene | DMF      | spiro-OMeTAD | Li+TBP        | 14.7 |  |
| Besleaga, C. et al., J. Phys. Chem. Lett. 7, 5168–5175 (2016)     | 2016 | TiO <sub>2</sub> | mTiO <sub>2</sub> | MAPbI <sub>3</sub> -xClx                            | one-step | spin     | diethyl ether | DMF+DMSO | no           | no            | 5.9  |  |
| Besleaga, C. et al., J. Phys. Chem. Lett. 7, 5168–5175 (2016)     | 2016 | TiO <sub>2</sub> | mTiO <sub>2</sub> | MAPbI <sub>3</sub> -xClx                            | one-step | spin     | diethyl ether | DMF+DMSO | spiro-OMeTAD | Li+TBP        | 12   |  |
| Besleaga, C. et al., J. Phys. Chem. Lett. 7, 5168–5175 (2016)     | 2016 | TiO <sub>2</sub> | mTiO <sub>2</sub> | MAPbI <sub>3</sub> -xClx                            | one-step | spin     | diethyl ether | DMF+DMSO | spiro-OMeTAD | Li+TBP        | 11.6 |  |
| Bi, D. et al., Sci. Adv. 2, e1501170–e1501170 (2016)              | 2016 | TiO <sub>2</sub> | mTiO <sub>2</sub> | FAI, PbI <sub>2</sub> , MABr, and PbBr <sub>2</sub> | one-step | spin 2-3 | chlorobenzene | DMF+DMSO | spiro-OMeTAD | Li+TBP+FK 209 | 20.8 |  |
| Chang, S. et al., ACS Appl. Mater. Interfaces 8, 8511–8519 (2016) | 2016 | IBF-Ep           | 0                 | MAPbI <sub>3</sub> -xClx                            | one-step | spin     | no            | DMF      | spiro-OMeTAD | Li+TBP        | 6.9  |  |
| Chang, S. et al., ACS Appl. Mater. Interfaces 8, 8511–8519 (2016) | 2016 | PCBM             | 0                 | MAPbI <sub>3</sub> -xClx                            | one-step | spin     | no            | DMF      | spiro-OMeTAD | Li+TBP        | 2.5  |  |

|                                                                       |      |          |       |             |          |          |    |                 |              |        |      |
|-----------------------------------------------------------------------|------|----------|-------|-------------|----------|----------|----|-----------------|--------------|--------|------|
| Chaudhary, D. K. et al., RSC Adv. 6, 94731–94738 (2016)               | 2016 | TiO2     | 0     | MAPbI3-xClx | one-step | spin     | no | DMF             | P3HT         | no     | 8.1  |
| Chaudhary, D. K. et al., RSC Adv. 6, 94731–94738 (2016)               | 2016 | TiO2     | 0     | MAPbI3-xClx | one-step | spin     | no | DMF             | P3HT         | no     | 5.5  |
| Chen, H. N. et al., Adv. Energy Mater. 6, 1502087 (2016)              | 2016 | TiO2     | mTiO2 | MAPbI3      | two-step | spin-dip | no | DMF             | no           | no     | 8.7  |
| Chen, H. N. et al., Adv. Energy Mater. 6, 1502087 (2016)              | 2016 | TiO2     | mTiO2 | MAPbI3      | two-step | spin-dip | no | DMF+cyclohexane | no           | no     | 14.4 |
| Chen, X. et al., J. Mater. Chem. A 4, 6521–6526 (2016)                | 2016 | TiO2     | 0     | MAPbI3      | two-step | spin-dip | no | DMF             | spiro-OMeTAD | Li+TBP | 13.3 |
| Chen, X. et al., J. Mater. Chem. A 4, 6521–6526 (2016)                | 2016 | TiO2     | TiO2  | MAPbI3      | two-step | spin-dip | no | DMF             | spiro-OMeTAD | Li+TBP | 15.7 |
| Chen, L.-C. et al., Mater. Sci. Semicond. Process. 56, 179–182 (2016) | 2016 | graphene | mTiO2 | MAPbI3      | one-step | spin     | no | DMSO+GBL        | spiro-OMeTAD | Li+TBP | 6.9  |
| Chen, H. W. et al., Sci. Rep. 6, 34319 (2016)                         | 2016 | TiO2     | mTiO2 | MAPbI3      | one-step | spin     | no | DMF             | MEH-PPV      | no     | 9.7  |
| Chen, H. W. et al., Sci. Rep. 6, 34319 (2016)                         | 2016 | TiO2     | 0     | MAPbI3      | one-step | spin     | no | DMF             | spiro-OMeTAD | Li+TBP | 13.3 |
| Chen, H. W. et al., Sci. Rep. 6, 34319 (2016)                         | 2016 | TiO2     | mTiO2 | MAPbI3      | one-step | spin     | no | DMF             | spiro-OMeTAD | Li+TBP | 12.3 |
| Chen, H. W. et al., Sci. Rep. 6, 34319 (2016)                         | 2016 | TiO2     | mTiO2 | MAPbI3      | two-step | spin     | no | DMF             | spiro-OMeTAD | Li+TBP | 13.4 |

|                                                             |      |      |       |                    |          |          |               |      |              |        |      |
|-------------------------------------------------------------|------|------|-------|--------------------|----------|----------|---------------|------|--------------|--------|------|
| Chen, B.-X. et al., J. Mater. Chem. A 4, 15662–15669 (2016) | 2016 | TiO2 | 0     | MAPbI3             | one-step | spin     | toluene       | DMSO | spiro-OMeTAD | Li+TBP | 5.6  |
| Chen, B.-X. et al., J. Mater. Chem. A 4, 15662–15669 (2016) | 2016 | TiO2 | PS    | MAPbI3             | one-step | spin     | toluene       | DMSO | spiro-OMeTAD | Li+TBP | 11.7 |
| Cheng, N. et al., J. Power Sources 321, 71–75 (2016)        | 2016 | TiO2 | mTiO2 | MAPbI3             | two-step | spin     | no            | DMF  | no           | no     | 12.7 |
| Cheng, N. et al., J. Power Sources 321, 71–75 (2016)        | 2016 | TiO2 | mTiO2 | MAPbI3             | two-step | spin     | no            | DMF  | no           | no     | 9.9  |
| Cheng, N. et al., J. Power Sources 319, 111–115 (2016)      | 2016 | TiO2 | 0     | MAPbI3             | two-step | spin     | chlorobenzene | DMF  | spiro-OMeTAD | no     | 11.6 |
| Cheng, N. et al., J. Power Sources 319, 111–115 (2016)      | 2016 | TiO2 | 0     | MAPbI3             | two-step | spin     | ethanol       | DMF  | spiro-OMeTAD | no     | 12.1 |
| Cheng, N. et al., J. Power Sources 319, 111–115 (2016)      | 2016 | TiO2 | 0     | MAPbI3             | two-step | spin     | no            | DMF  | spiro-OMeTAD | no     | 10.3 |
| Cheng, N. et al., J. Power Sources 319, 111–115 (2016)      | 2016 | TiO2 | 0     | MAPbI3             | two-step | spin     | IPA           | DMF  | spiro-OMeTAD | no     | 11.2 |
| Chiang, Y.-H. et al., ChemSusChem 9, 2620–2627 (2016)       | 2016 | TiO2 | mTiO2 | MAPb(SCN)<br>xI3-x | two-step | vasp     | no            | DMF  | spiro-OMeTAD | Li+TBP | 12.7 |
| Chiang, Y.-H. et al., ChemSusChem 9, 2620–2627 (2016)       | 2016 | TiO2 | mTiO2 | MAPbI3             | two-step | vasp     | no            | DMF  | spiro-OMeTAD | Li+TBP | 11.3 |
| Cohen, B. El et al., J. Phys. Chem. C 120, 142–147 (2016)   | 2016 | TiO2 | mTiO2 | MAPbI3             | two-step | spin-dip | no            | DMF  | no           | no     | 10.3 |

|                                                           |      |      |       |             |          |          |         |     |              |        |      |
|-----------------------------------------------------------|------|------|-------|-------------|----------|----------|---------|-----|--------------|--------|------|
| Cohen, B. El et al., J. Phys. Chem. C 120, 142–147 (2016) | 2016 | TiO2 | mTiO2 | MAPbI3      | two-step | spin-dip | toluene | DMF | no           | no     | 11.8 |
| Cui, D. et al., J. Phys. Chem. C 120, 42–47 (2016)        | 2016 | TiO2 | 0     | MAPbBr3     | two-step | vasp     | no      | DMF | spiro-OMeTAD | Li+TBP | 3.5  |
| Cui, D. et al., J. Phys. Chem. C 120, 42–47 (2016)        | 2016 | TiO2 | 0     | MAPbI3      | two-step | vasp     | no      | DMF | spiro-OMeTAD | Li+TBP | 12.8 |
| Cui, D. et al., J. Phys. Chem. C 120, 42–47 (2016)        | 2016 | TiO2 | 0     | MAPbI3-xBrx | two-step | vasp     | no      | DMF | spiro-OMeTAD | Li+TBP | 6.8  |
| Cui, D. et al., J. Phys. Chem. C 120, 42–47 (2016)        | 2016 | TiO2 | 0     | MAPbI3-xBrx | two-step | vasp     | no      | DMF | spiro-OMeTAD | Li+TBP | 4.1  |
| Du, Y. et al., RSC Adv. 6, 83264–83272 (2016)             | 2016 | TiO2 | 0     | MAPbI3      | two-step | CVD      | no      | na  | P3HT         | Li+TBP | 11.2 |
| Du, Y. et al., RSC Adv. 6, 101250–101258 (2016)           | 2016 | TiO2 | 0     | MAPbI3      | two-step | spin-dip | no      | DMF | spiro-OMeTAD | Li+TBP | 10.4 |
| Du, Y. et al., RSC Adv. 6, 101250–101258 (2016)           | 2016 | TiO2 | 0     | MAPbI3      | two-step | CVD      | no      | na  | spiro-OMeTAD | Li+TBP | 12.7 |
| Duan, J. et al., Int. J. Energy Res. 40, 806–813 (2016)   | 2016 | TiO2 | mTiO2 | MAPbI3      | two-step | dipping  | no      | na  | spiro-OMeTAD | Li+TBP | 10.5 |
| Duan, J. et al., Int. J. Energy Res. 40, 806–813 (2016)   | 2016 | ZnO  | mTiO2 | MAPbI3      | two-step | dipping  | no      | na  | spiro-OMeTAD | Li+TBP | 8    |
| Duan, J. et al., Int. J. Energy Res. 40, 806–813 (2016)   | 2016 | TiO2 | mTiO2 | MAPbI3      | two-step | dipping  | no      | na  | spiro-OMeTAD | Li+TBP | 12.8 |



|                                                                          |      |       |       |             |          |          |              |     |              |                  |      |
|--------------------------------------------------------------------------|------|-------|-------|-------------|----------|----------|--------------|-----|--------------|------------------|------|
| Dubey, A. et al, Sol. Energy Mater. Sol. Cells<br>145, 193–199<br>(2016) | 2016 | TiO2  | mTiO2 | MAPbI3      | two-step | spin-dip | no           | DMF | PDPP3T       | no               | 12.3 |
| Dubey, A. et al, Sol. Energy Mater. Sol. Cells<br>145, 193–199<br>(2016) | 2016 | TiO2  | mTiO2 | MAPbI3      | two-step | spin-dip | no           | DMF | spiro-OMeTAD | Li+TBP           | 12.3 |
| Fei, C. et al., Nano Energy 27, 17–26<br>(2016)                          | 2016 | SnO2  | 0     | MAPbI3      | one-step | spin     | ethylacetate | DMF | spiro-OMeTAD | Li+TBP           | 14   |
| Fei, C. et al., Nano Energy 27, 17–26<br>(2016)                          | 2016 | SnO2  | 0     | MAPbI3-xClx | one-step | spin     | ethylacetate | DMF | spiro-OMeTAD | Li+TBP           | 17.2 |
| Fernandes, S. L. et al., Mater. Lett. 181, 103–<br>107 (2016)            | 2016 | Nb2O5 | mTiO2 | MAPbI3      | two-step | spin-dip | no           | DMF | spiro-OMeTAD | no               | 12.3 |
| Fu, K. et al., Nanoscale 8, 4181–<br>4193 (2016)                         | 2016 | TiO2  | mTiO2 | MAPbI3      | two-step | spin-dip | no           | DMF | spiro-OMeTAD | Li+TBP+FK<br>102 | 14.6 |
| Gong, G. et al., J. Mater. Chem. A 4, 3661–<br>3666 (2016)               | 2016 | TiO2  | mTiO2 | MAPbI3      | two-step | spin-dip | no           | DMF | DEPT-SC      | no               | 9.7  |
| Gong, G. et al., J. Mater. Chem. A 4, 3661–<br>3666 (2016)               | 2016 | TiO2  | mTiO2 | MAPbI3      | two-step | spin-dip | no           | DMF | DOPT-SC      | no               | 8.7  |
| Gong, G. et al., J. Mater. Chem. A 4,<br>3661–3666 (2016)                | 2016 | TiO2  | mTiO2 | MAPbI3      | two-step | spin-dip | no           | DMF | DHPT-SC      | no               | 8.4  |
| Gong, G. et al., J. Mater. Chem. A 4,<br>3661–3666 (2016)                | 2016 | TiO2  | mTiO2 | MAPbI3      | two-step | spin-dip | no           | DMF | spiro-OMeTAD | no               | 5.4  |
| Gong, G. et al., Org. Electron. physics, Mater.<br>Appl. 35, 171–        | 2016 | TiO2  | mTiO2 | MAPbI3      | two-step | spin-dip | no           | DMF | DEPT-SC      | no               | 9.7  |

|                                                                          |      |       |       |                              |          |          |               |          |              |              |      |  |
|--------------------------------------------------------------------------|------|-------|-------|------------------------------|----------|----------|---------------|----------|--------------|--------------|------|--|
| 175 (2016)                                                               |      |       |       |                              |          |          |               |          |              |              |      |  |
| Gong, G. et al., Org. Electron. physics, Mater. Appl. 35, 171–175 (2016) | 2016 | TiO2  | mTiO2 | MAPbI3                       | two-step | spin-dip | no            | DMF      | DEPT-SC      | Li+TBP       | 5.2  |  |
| Gong, G. et al., Org. Electron. physics, Mater. Appl. 35, 171–175 (2016) | 2016 | TiO2  | mTiO2 | MAPbI3                       | two-step | spin-dip | no            | DMF      | spiro-OMeTAD | Li+TBP       | 13.2 |  |
| Gong, G. et al., Org. Electron. physics, Mater. Appl. 35, 171–175 (2016) | 2016 | TiO2  | mTiO2 | MAPbI3                       | two-step | spin-dip | no            | DMF      | DEPT-SC      | F4TCNQ       | 11.5 |  |
| Guerrero, A. et al., J. Phys. Chem. C 120, 8023–8032 (2016)              | 2016 | SnO2  | 0     | FA0.85MA0.15Pb(I0.85Br0.15)3 | one-step | spin 2-3 | chlorobenzene | DMF+DMSO | spiro-OMeTAD | Li+TBP+FK209 | 16.9 |  |
| Guerrero, A. et al., J. Phys. Chem. C 120, 8023–8032 (2016)              | 2016 | TiO2  | 0     | FA0.85MA0.15Pb(I0.85Br0.15)3 | one-step | spin 2-3 | chlorobenzene | DMF+DMSO | spiro-OMeTAD | Li+TBP+FK209 | 9.8  |  |
| Guerrero, A. et al., J. Phys. Chem. C 120, 8023–8032 (2016)              | 2016 | Nb2O5 | 0     | FA0.85MA0.15Pb(I0.85Br0.15)3 | one-step | spin 2-3 | chlorobenzene | DMF+DMSO | spiro-OMeTAD | Li+TBP+FK209 | 0.1  |  |
| Guo, J. J. et al., Synth. Met. 220, 462–468 (2016)                       | 2016 | TiO2  | mTiO2 | MAPbI3                       | two-step | spin-dip | no            | DMF      | CoPcNO2-Oph  | no           | 8.2  |  |

|                                                                   |      |      |       |             |          |          |               |        |              |        |      |
|-------------------------------------------------------------------|------|------|-------|-------------|----------|----------|---------------|--------|--------------|--------|------|
| Guo, J. J. et al., Synth. Met. 220, 462–468 (2016)                | 2016 | TiO2 | mTiO2 | MAPbI3      | two-step | spin-dip | no            | DMF    | spiro-OMeTAD | Li+TBP | 10.8 |
| Guo, Y. et al., RSC Adv. 6, 62522–62528 (2016)                    | 2016 | ZnO  | 0     | MAPbI3      | two-step | spin-dip | no            | DMF    | spiro-OMeTAD | Li+TBP | 9.4  |
| Hao, Q. et al., J. Alloys Compd. 671, 11–16 (2016)                | 2016 | TiO2 | 0     | MAPbI3      | two-step | vasp     | no            | NEP    | spiro-OMeTAD | Li+TBP | 10.2 |
| He, X. et al., J. Power Sources 332, 366–371 (2016)               | 2016 | TiO2 | mTiO2 | MAPbI3      | one-step | spin     | diethyl ether | DMF    | spiro-OMeTAD | Li+TBP | 17.6 |
| He, X. et al., J. Power Sources 332, 366–371 (2016)               | 2016 | TiO2 | mTiO2 | MAPbI3      | one-step | spin     | diethyl ether | DMF    | spiro-OMeTAD | Li+TBP | 15.2 |
| He, X. et al., J. Power Sources 332, 366–371 (2016)               | 2016 | TiO2 | mTiO2 | MAPbI3      | one-step | spin     | diethyl ether | DMF    | spiro-OMeTAD | Li+TBP | 13.5 |
| Heo, J. H. and Im, S. H., Nanoscale 8, 2554–2560 (2016)           | 2016 | TiO2 | 0     | MAPbI3-xClx | one-step | spin     | no            | DMF+HI | PTAA         | Li+TBP | 18.9 |
| Hou, Y. et al., Sol. Energy Mater. Sol. Cells 155, 101–107 (2016) | 2016 | TiO2 | mTiO2 | MAPbI3      | two-step | spin-dip | no            | DMF    | spiro-OMeTAD | Li+TBP | 14   |
| Hou, Y. et al., Sol. Energy Mater. Sol. Cells 155, 101–107 (2016) | 2016 | TiO2 | mTiO2 | MAPbI3      | two-step | spin-dip | no            | DMF    | spiro-OMeTAD | Li+TBP | 11.8 |
| Hou, X. et al., Sol. Energy Mater. Sol. Cells 149, 121–127 (2016) | 2016 | TiO2 | mTiO2 | MAPbI3      | two-step | spin     | no            | DMF    | spiro-OMeTAD | Li+TBP | 12   |

|                                                                         |      |      |      |             |          |          |    |         |              |          |      |
|-------------------------------------------------------------------------|------|------|------|-------------|----------|----------|----|---------|--------------|----------|------|
| Hou, X. et al., Sol. Energy Mater. Sol. Cells<br>149, 121–127<br>(2016) | 2016 | TiO2 | ZGO  | MAPbI3      | two-step | spin     | no | DMF     | spiro-OMeTAD | Li+TBP   | 14.3 |
| Hu, Y. et al., J. Alloys Compd. 679, 32–38<br>(2016)                    | 2016 | TiO2 | TiO2 | MAPbI3      | two-step | spin     | no | DMF     | spiro-OMeTAD | Li+TBP   | 10.2 |
| Hu, Y. et al., J. Alloys Compd. 679, 32–38<br>(2016)                    | 2016 | TiO2 | TiO2 | MAPbI3      | two-step | spin     | no | DMF     | spiro-OMeTAD | Li+TBP   | 8    |
| Huang, L. et al., Sol. Energy Mater. Sol.<br>Cells 149, 1–8 (2016)      | 2016 | TiO2 | no   | MAPbI3-xClx | one-step | spin     | no | DMF     | spiro-OMeTAD | Li+TBP   | 12.3 |
| Huang, L. et al., Sol. Energy Mater. Sol. Cells<br>149, 1–8 (2016)      | 2016 | no   | no   | MAPbI3-xClx | one-step | spin     | no | DMF     | spiro-OMeTAD | Li+TBP   | 10.7 |
| Huang, F. et al., Nano Energy 27,<br>509–514 (2016)                     | 2016 | TiO2 | 0    | MAPbI3      | one-step | spin     | no | DMF     | spiro-OMeTAD | Li+TBP   | 13.8 |
| Huang, Y. et al., Thin Solid Films 598, 1–5<br>(2016)                   | 2016 | TiO2 | TiO2 | MAPbI3      | two-step | spin-dip | no | DMF     | spiro-OMeTAD | Li+TBP   | 11.3 |
| Huang, J. et al., RSC Adv. 6, 55720–55725<br>(2016)                     | 2016 | TiO2 | 0    | MAPbI3      | one-step | spin     | no | DMF     | spiro-OMeTAD | TFSI+TBP | 12.1 |
| Huang, J. et al., RSC Adv. 6, 55720–55725<br>(2016)                     | 2016 | TiO2 | 0    | MAPbI3      | one-step | spin     | no | DMF     | spiro-OMeTAD | TFSI+TBP | 12.7 |
| Huang, J. et al., RSC Adv. 6, 55720–55725<br>(2016)                     | 2016 | TiO2 | 0    | MAPbI3      | one-step | spin     | no | DMF+HBr | spiro-OMeTAD | TFSI+TBP | 15.8 |
| Huang, J. et al., RSC Adv. 6, 55720–55725<br>(2016)                     | 2016 | TiO2 | 0    | MAPbI3      | one-step | spin     | no | DMF+HCl | spiro-OMeTAD | TFSI+TBP | 13.7 |

|                                                                          |      |      |       |        |          |       |    |        |              |               |      |
|--------------------------------------------------------------------------|------|------|-------|--------|----------|-------|----|--------|--------------|---------------|------|
| Huang, J. et al., RSC Adv. 6, 55720–55725 (2016)                         | 2016 | TiO2 | 0     | MAPbI3 | one-step | spin  | no | DMF+HI | spiro-OMeTAD | TFSI+TBP      | 14.4 |
| Huang, J. et al., Sol. Energy 133, 331–338 (2016)                        | 2016 | ZnO  | 0     | MAPbI3 | two-step | CVD   | no | na     | spiro-OMeTAD | no            | 8.3  |
| Huang, J. et al., Sol. Energy 133, 331–338 (2016)                        | 2016 | FPDI | 0     | MAPbI3 | two-step | CVD   | no | na     | spiro-OMeTAD | no            | 7.9  |
| Huang, H. et al., Nano Energy 27, 352–358 (2016)                         | 2016 | TiO2 | mTiO2 | MAPbI3 | two-step | spray | no | DMSO   | spiro-OMeTAD | Li+TBP+FK 209 | 16   |
| Jain, S. M. et al., Energy Environ. Sci. 9, 3770–3782 (2016)             | 2016 | TiO2 | 0     | MAPbI3 | one-step | spin  | no | GBL    | spiro-OMeTAD | Li+TBP        | 18.5 |
| Jain, S. M. et al., Energy Environ. Sci. 9, 3770–3782 (2016)             | 2016 | TiO2 | 0     | MAPbI3 | one-step | spin  | no | GBL    | spiro-OMeTAD | Li+TBP        | 9.5  |
| Jeon, S. et al., Org. Electron. physics, Mater. Appl. 37, 134–140 (2016) | 2016 | TiO2 | mTiO2 | MAPbI3 | two-step | spin  | no | DMF    | DPIO         | no            | 10.1 |
| Jeon, S. et al., Org. Electron. physics, Mater. Appl. 37, 134–140 (2016) | 2016 | TiO2 | mTiO2 | MAPbI3 | two-step | spin  | no | DMF    | DPIE         | no            | 5.4  |
| Jeon, S. et al., Org. Electron. physics, Mater. Appl. 37, 134–140 (2016) | 2016 | TiO2 | mTiO2 | MAPbI3 | two-step | spin  | no | DMF    | spiro-OMeTAD | no            | 12   |
| Jeon, S. et al., Org. Electron. physics, Mater. Appl. 37, 134–140 (2016) | 2016 | TiO2 | mTiO2 | MAPbI3 | two-step | spin  | no | DMF    | spiro-OMeTAD | no            | 7.9  |

|                                                            |      |      |       |                       |          |      |               |          |              |              |      |
|------------------------------------------------------------|------|------|-------|-----------------------|----------|------|---------------|----------|--------------|--------------|------|
| Jeong, I. et al., Nano Energy 28, 380–389 (2016)           | 2016 | TiO2 | 0     | MAPbI3                | one-step | spin | diethyl ether | DMF+DMSO | spiro-OMeTAD | Li+TBP       | 19.6 |
| Jeong, I. et al., Nano Energy 28, 380–389 (2016)           | 2016 | TiO2 | 0     | MAPbI3                | one-step | spin | diethyl ether | DMF+DMSO | spiro-OMeTAD | Li+TBP       | 15.5 |
| Jiang, X. et al., J. Phys. Chem. Lett. 7, 4142–4146 (2016) | 2016 | 0    | mTiO2 | MAPbI3                | one-step | spin | no            | GBL      | no           | no           | 12.3 |
| Jiang, X. et al., J. Phys. Chem. Lett. 7, 4142–4146 (2016) | 2016 | TiO2 | mTiO2 | MAPbI3                | one-step | spin | no            | GBL      | no           | no           | 12.7 |
| Jiang, X. et al., J. Phys. Chem. Lett. 7, 4142–4146 (2016) | 2016 | 0    | mTiO2 | (5-AVA)x(MA)1 - xPbI3 | one-step | spin | no            | GBL      | no           | no           | 12.9 |
| Jiang, X. et al., J. Phys. Chem. Lett. 7, 4142–4146 (2016) | 2016 | TiO2 | mTiO2 | (5-AVA)x(MA)1 - xPbI3 | one-step | spin | no            | GBL      | no           | no           | 13.3 |
| Ke, W. et al., Adv. Mater. 28, 5214–5221 (2016)            | 2016 | SnO2 | PCBM  | MAPbI3                | one-step | spin | no            | DMF+DMSO | spiro-OMeTAD | Li+TBP       | 17.8 |
| Ke, W. et al., Adv. Mater. 28, 5214–5221 (2016)            | 2016 | SnO2 | PCBM  | MAPbI3                | one-step | spin | no            | DMF+DMSO | spiro-OMeTAD | Li+TBP       | 16.4 |
| Ke, W. et al., J. Mater. Chem. A 4, 14276–14283 (2016)     | 2016 | SnO2 | 0     | MAPbI3                | one-step | spin | no            | DMF+DMSO | spiro-OMeTAD | Li+TBP+FK102 | 16.9 |
| Ke, W. et al., J. Mater. Chem. A 4, 14276–14283 (2016)     | 2016 | SnO2 | PCBM  | MAPbI3                | one-step | spin | no            | DMF+DMSO | spiro-OMeTAD | Li+TBP+FK102 | 19.1 |

|                                                                      |      |                  |                                 |                                      |          |          |    |        |              |        |      |
|----------------------------------------------------------------------|------|------------------|---------------------------------|--------------------------------------|----------|----------|----|--------|--------------|--------|------|
| Kim, I. S. et al., ACS Appl. Mater. Interfaces 8, 24310–24314 (2016) | 2016 | TiO <sub>2</sub> | 0                               | MAPbI <sub>3</sub> -xCl <sub>x</sub> | one-step | spin     | no | DMF    | spiro-OMeTAD | Li+TBP | 14.3 |
| Kim, A. et al., Nanoscale 8, 6308–6316 (2016)                        | 2016 | ZnO              | mAl <sub>2</sub> O <sub>3</sub> | MAPbI <sub>3</sub>                   | two-step | spin     | no | DMF    | spiro-OMeTAD | Li+TBP | 11   |
| Kim, J. et al., J. Phys. Chem. C 120, 11262–11267 (2016)             | 2016 | TiO <sub>2</sub> | 0                               | FAPbI <sub>3</sub>                   | one-step | spin     | no | DMF    | spiro-OMeTAD | Li+TBP | 4    |
| Kim, J. et al., J. Phys. Chem. C 120, 11262–11267 (2016)             | 2016 | TiO <sub>2</sub> | 0                               | FAPbI <sub>3</sub>                   | one-step | spin     | no | DMF+HI | spiro-OMeTAD | Li+TBP | 16   |
| Kulbak, M. et al., J. Phys. Chem. Lett. 6, 2452–2456 (2015)          | 2016 | TiO <sub>2</sub> | mAl <sub>2</sub> O <sub>3</sub> | CsPbI <sub>3</sub>                   | two-step | spin-dip | no | DMF    | no           | no     | 1.1  |
| Kulbak, M. et al., J. Phys. Chem. Lett. 6, 2452–2456 (2015)          | 2016 | TiO <sub>2</sub> | mTiO <sub>2</sub>               | CsPbI <sub>3</sub>                   | two-step | spin-dip | no | DMF    | no           | no     | 5.5  |
| Kulbak, M. et al., J. Phys. Chem. Lett. 6, 2452–2456 (2015)          | 2016 | TiO <sub>2</sub> | mTiO <sub>2</sub>               | CsPbI <sub>3</sub>                   | two-step | spin-dip | no | DMF    | CBP          | no     | 4.9  |
| Kulbak, M. et al., J. Phys. Chem. Lett. 7, 167–172 (2016)            | 2016 | TiO <sub>2</sub> | mTiO <sub>2</sub>               | MAPbBr <sub>3</sub>                  | two-step | spin-dip | no | DMF    | PTAA         | no     | 6.6  |
| Kulbak, M. et al., J. Phys. Chem. Lett. 6, 2452–2456 (2015)          | 2016 | TiO <sub>2</sub> | mTiO <sub>2</sub>               | CsPbI <sub>3</sub>                   | two-step | spin-dip | no | DMF    | PTAA         | no     | 6    |
| Kulbak, M. et al., J. Phys. Chem. Lett. 7, 167–172 (2016)            | 2016 | TiO <sub>2</sub> | mTiO <sub>2</sub>               | CsPbBr <sub>3</sub>                  | two-step | spin-dip | no | DMF    | PTAA         | no     | 6.2  |
| Kulbak, M. et al., J. Phys. Chem. Lett. 6, 2452–2456 (2015)          | 2016 | TiO <sub>2</sub> | mAl <sub>2</sub> O <sub>3</sub> | CsPbI <sub>3</sub>                   | two-step | spin-dip | no | DMF    | spiro-OMeTAD | Li+TBP | 1.9  |

|                                                                   |      |      |       |        |          |          |               |                                |              |                   |      |
|-------------------------------------------------------------------|------|------|-------|--------|----------|----------|---------------|--------------------------------|--------------|-------------------|------|
| Kulbak, M. et al., J. Phys. Chem. Lett. 6, 2452–2456 (2015)       | 2016 | TiO2 | mTiO2 | CsPbI3 | two-step | spin-dip | no            | DMF                            | spiro-OMeTAD | Li+TBP            | 5    |
| Kumar, Y. et al., Sol. Energy Mater. Sol. Cells 157, 10–17 (2016) | 2016 | TiO2 | 0     | MAPbI3 | one-step | spin     | chlorobenzene | DMF                            | spiro-OMeTAD | Li+TBP            | 4.9  |
| Kumar, Y. et al., Sol. Energy Mater. Sol. Cells 157, 10–17 (2016) | 2016 | TiO2 | 0     | MAPbI3 | one-step | spin     | chlorobenzene | DMF                            | spiro-OMeTAD | Li+TBP            | 6.8  |
| Kumar, Y. et al., Sol. Energy Mater. Sol. Cells 157, 10–17 (2016) | 2016 | TiO2 | 0     | MAPbI3 | one-step | spin     | no            | DMF                            | spiro-OMeTAD | Li+TBP            | 3.1  |
| Lan, C. et al., CrystEngComm 18, 9243–9251 (2016)                 | 2016 | TiO2 | mTiO2 | MAPbI3 | two-step | spin     | no            | DMF                            | spiro-OMeTAD | Li+TBP            | 11.5 |
| Lee, S. J. et al., J. Am. Chem. Soc. 138, 3974–3977 (2016)        | 2016 | TiO2 | mTiO2 | FASnI3 | one-step | spin 2-3 | toluene       | DMF+DMSO<br>+SnF2              | spiro-OMeTAD | lutidiene+TB<br>P | 2.8  |
| Lee, S. J. et al., J. Am. Chem. Soc. 138, 3974–3977 (2016)        | 2016 | TiO2 | mTiO2 | FASnI3 | one-step | spin 2-3 | toluene       | DMF+DMSO<br>+SnF2+pyrazi<br>ne | spiro-OMeTAD | lutidiene+TB<br>P | 4.8  |
| Lee, J. W. et al., Acc. Chem. Res. 49, 311–319 (2016)             | 2016 | TiO2 | 0     | FAPbI3 | one-step | spin     | diethyl ether | DMF+DMSO                       | spiro-OMeTAD | Li+TBP            | 11.5 |
| Lee, J. W. et al., Acc. Chem. Res. 49, 311–319 (2016)             | 2016 | TiO2 | 0     | FAPbI3 | one-step | spin     | diethyl ether | DMF+DMSO<br>+thiourea          | spiro-OMeTAD | Li+TBP            | 14.3 |
| Lei, Y. et al., J. Mater. Chem. A 4, 5474–5481 (2016)             | 2016 | TiO2 | mTiO2 | MAPbI3 | two-step | spin-dip | no            | DMF                            | spiro-OMeTAD | Li+TBP            | 5    |



|                                                               |      |      |       |             |          |          |               |          |              |        |      |
|---------------------------------------------------------------|------|------|-------|-------------|----------|----------|---------------|----------|--------------|--------|------|
| Lei, Y. et al., J. Mater. Chem. A 4, 5474–5481 (2016)         | 2016 | ZnO  | mZnO  | MAPbI3      | two-step | spin-dip | no            | DMF      | spiro-OMeTAD | Li+TBP | 8.8  |
| Leyden, M. R. et al., J. Mater. Chem. A 4, 13125–13132 (2016) | 2016 | TiO2 | mTiO2 | FAPbI3      | one-step | spin     | diethyl ether | DMF+DMSO | spiro-OMeTAD | Li+TBP | 18.3 |
| Leyden, M. R. et al., J. Mater. Chem. A 4, 13125–13132 (2016) | 2016 | TiO2 | mTiO2 | FAPbI3      | two-step | CVD      | no            | na       | spiro-OMeTAD | Li+TBP | 15.6 |
| Li, H. et al., Nanoscale 8, 6379–6385 (2016)                  | 2016 | TiO2 | mTiO2 | MAPbI3      | two-step | spin-dip | no            | DMF      | no           | no     | 14.7 |
| Li, H. et al., Nanoscale 8, 6379–6385 (2016)                  | 2016 | TiO2 | mTiO2 | MAPbI3      | two-step | spin-dip | no            | DMF      | no           | no     | 9.9  |
| Li, H. et al., Nanoscale 8, 6379–6385 (2016)                  | 2016 | TiO2 | mTiO2 | MAPbI3      | two-step | spin-dip | no            | DMF      | spiro-OMeTAD | Li+TBP | 13.3 |
| Li, H. et al., Sol. Energy 126, 243–251 (2016)                | 2016 | TiO2 | mTiO2 | MAPbI3      | two-step | spin-dip | no            | DMF      | spiro-OMeTAD | Li+TBP | 12.9 |
| Li, M. et al, Adv. Energy Mater. 6, 1601156 (2016)            | 2016 | TiO2 | mTiO2 | MAPbI3-xClx | one-step | spin     | no            | DMF      | spiro-OMeTAD | no     | 14.8 |
| Li, M. et al, Adv. Energy Mater. 6, 1601156 (2016)            | 2016 | TiO2 | mTiO2 | MAPbI3-xClx | one-step | spin     | no            | DMF      | spiro-OMeTAD | CuSCN  | 18   |
| Li, M. et al, Adv. Energy Mater. 6, 1601156 (2016)            | 2016 | TiO2 | mTiO2 | MAPbI3-xClx | one-step | spin     | no            | DMF      | spiro-OMeTAD | CuI    | 16.7 |
| Li, M. et al., ChemSusChem 9, 2862–2869 (2016)                | 2016 | TiO2 | mTiO2 | MAPbI3-xClx | one-step | spin 2-3 | chlorobenzene | DMF      | ChI-1        | no     | 11.5 |

|                                                                  |      |      |       |             |          |            |               |          |              |        |      |
|------------------------------------------------------------------|------|------|-------|-------------|----------|------------|---------------|----------|--------------|--------|------|
| Li, M. et al., ChemSusChem 9, 2862–2869 (2016)                   | 2016 | TiO2 | mTiO2 | MAPbI3-xClx | one-step | spin 2-3   | chlorobenzene | DMF      | ChI-2        | no     | 8.1  |
| Li, M. et al., ChemSusChem 9, 2862–2869 (2016)                   | 2016 | TiO2 | mTiO2 | MAPbI3-xClx | one-step | spin 2-3   | chlorobenzene | DMF      | P3HT         | Li+TBP | 8.9  |
| Li, X. et al., ACS Appl. Mater. Interfaces 8, 21358–21365 (2016) | 2016 | TiO2 | mTiO2 | MAPbI3      | one-step | spin 2-3   | toluene       | DMSO+GBL | spiro-OMeTAD | Li+TBP | 16.4 |
| Li, X. et al., ACS Appl. Mater. Interfaces 8, 21358–21365 (2016) | 2016 | TiO2 | TiO2  | MAPbI3      | one-step | spin 2-3   | toluene       | DMSO+GBL | spiro-OMeTAD | Li+TBP | 18.2 |
| Li, J. et al., Nanoscale 8, 14163–14170 (2016)                   | 2016 | TiO2 | mTiO2 | MAPbI3      | two-step | spin-dip   | no            | DMF      | no           | no     | 12.3 |
| Li, J. et al., Nanoscale 8, 14163–14170 (2016)                   | 2016 | TiO2 | mTiO2 | MAPbI3      | two-step | spin-dip   | no            | DMF      | no           | no     | 9.7  |
| Li, F. et al., Chem. Commun. 52, 5394–5397 (2016)                | 2016 | TiO2 | 0     | MAPbI3      | one-step | spin       | diethyl ether | DMF+DMSO | spiro-OMeTAD | Li+TBP | 17.8 |
| Li, F. et al., Chem. Commun. 52, 5394–5397 (2016)                | 2016 | TiO2 | 0     | MAPbI3      | one-step | spin       | diethyl ether | DMF+DMSO | spiro-OMeTAD | Li+TBP | 16.5 |
| Li, F. et al., J. Mater. Chem. A 4, 11372–11380 (2016)           | 2016 | TiO2 | mTiO2 | MAPbI3      | two-step | spin-spray | no            | DMF      | spiro-OMeTAD | Li+TBP | 10.8 |
| Li, F. et al., J. Mater. Chem. A 4, 11372–11380 (2016)           | 2016 | TiO2 | mTiO2 | MAPbI3      | two-step | spin-spray | no            | DMF      | spiro-OMeTAD | Li+TBP | 14.5 |
| Li, F. et al., J. Mater. Chem. A 4, 11372–11380 (2016)           | 2016 | TiO2 | mTiO2 | MAPbI3      | two-step | spin-spray | no            | DMF      | spiro-OMeTAD | Li+TBP | 7.6  |

|                                                       |      |                  |                   |                                      |          |          |    |     |              |        |      |
|-------------------------------------------------------|------|------------------|-------------------|--------------------------------------|----------|----------|----|-----|--------------|--------|------|
| Li, Y. et al., J. Power Sources 320, 204–211 (2016)   | 2016 | ZnO              | 0                 | MAPbI <sub>3</sub>                   | one-step | spin     | no | DMF | spiro-OMeTAD | Li+TBP | 15.5 |
| Liu, L. et al., Electrochim. Acta 222, 933–937 (2016) | 2016 | TiO <sub>2</sub> | TiO <sub>2</sub>  | MAPbI <sub>3</sub>                   | two-step | spin     | no | DMF | spiro-OMeTAD | Li+TBP | 12.6 |
| Liu, L. et al., Electrochim. Acta 222, 933–937 (2016) | 2016 | TiO <sub>2</sub> | TiO <sub>2</sub>  | MAPbI <sub>3</sub>                   | two-step | spin     | no | DMF | spiro-OMeTAD | Li+TBP | 8.5  |
| Liu, D. et al., RSC Adv. 6, 51279–51285 (2016)        | 2016 | TiO <sub>2</sub> | mTiO <sub>2</sub> | MAPbI <sub>3</sub> -xCl <sub>x</sub> | one-step | spin     | no | DMF | spiro-OMeTAD | Li+TBP | 14.3 |
| Liu, Z. et al., Nanoscale 8, 7017–7023 (2016)         | 2016 | TiO <sub>2</sub> | mTiO <sub>2</sub> | MAPbI <sub>3</sub>                   | two-step | spin-dip | no | GBL | no           | no     | 6.9  |
| Liu, J. et al., Electrochim. Acta 195, 143–149 (2016) | 2016 | TiO <sub>2</sub> | 0                 | MAPbI <sub>3</sub>                   | two-step | spin-dip | no | DMF | spiro-OMeTAD | Li+TBP | 9.9  |
| Liu, J. et al., Electrochim. Acta 195, 143–149 (2016) | 2016 | TiO <sub>2</sub> | 0                 | MAPbI <sub>3</sub>                   | two-step | spin-dip | no | DMF | spiro-OMeTAD | Li+TBP | 11.9 |
| Luo, S. et al., Mater. Lett. 169, 236–240 (2016)      | 2016 | TiO <sub>2</sub> | mTiO <sub>2</sub> | MAPbI <sub>3</sub>                   | two-step | spin     | no | DMF | spiro-OMeTAD | Li+TBP | 5.4  |
| Luo, S. et al., Mater. Lett. 169, 236–240 (2016)      | 2016 | TiO <sub>2</sub> | mTiO <sub>2</sub> | MAPbI <sub>3</sub> -xCl <sub>x</sub> | two-step | spin     | no | DMF | spiro-OMeTAD | Li+TBP | 11   |
| Mali, S. S. et al., Nanoscale 8, 2664–2677 (2016)     | 2016 | TiO <sub>2</sub> | mTiO <sub>2</sub> | MAPbI <sub>3</sub>                   | one-step | spin 2-3 | no | GBL | spiro-OMeTAD | Li+TBP | 9.7  |
| Mali, S. S. et al., Nanoscale 8, 2664–2677 (2016)     | 2016 | TiO <sub>2</sub> | mTiO <sub>2</sub> | MAPbI <sub>3</sub>                   | one-step | spin 2-3 | no | GBL | spiro-OMeTAD | Li+TBP | 11.1 |

|                                                                     |      |      |       |                            |          |           |    |     |              |        |      |
|---------------------------------------------------------------------|------|------|-------|----------------------------|----------|-----------|----|-----|--------------|--------|------|
| Mali, S. S. et al., <i>Nanoscale</i> 8, 2664–2677 (2016)            | 2016 | TiO2 | TiO2  | MAPbI3                     | one-step | spin 2-3  | no | GBL | spiro-OMeTAD | Li+TBP | 14.9 |
| Mali, S. S. et al., <i>Nanoscale</i> 8, 2664–2677 (2016)            | 2016 | TiO2 | TiO2  | MAPbI3                     | one-step | spin 2-3  | no | GBL | spiro-OMeTAD | Li+TBP | 11.2 |
| Marco, N. De et al., <i>Nano Lett.</i> 16, 1009–1016 (2016)         | 2016 | TiO2 | 0     | MAPbI3-xClx                | two-step | spin      | no | DMF | spiro-OMeTAD | Li+TBP | 16.4 |
| Marco, N. De et al., <i>Nano Lett.</i> 16, 1009–1016 (2016)         | 2016 | TiO2 | 0     | GA:MAPbI3-xClx             | two-step | spin      | no | DMF | spiro-OMeTAD | Li+TBP | 17.1 |
| McMeekin, D. P. et al., <i>Science</i> 351, 151–5 (2016)            | 2016 | SnO2 | PCBM  | FA0.83Cs0.17Pb(10.6Br0.4)3 | one-step | spin      | no | DMF | spiro-OMeTAD | Li+TBP | 17.1 |
| Murugadoss, G. et al., <i>J. Power Sources</i> 307, 891–897 (2016)  | 2016 | SnO2 | 0     | MAPbI3                     | two-step | spin      | no | DMF | CuSCN        | no     | 8.4  |
| Nejand, B. A. et al., <i>ChemSusChem</i> 9, 302–313 (2016)          | 2016 | TiO2 | mTiO2 | MAPbI3-xClx                | one-step | spin      | no | DMF | Cu2O         | no     | 4    |
| Nejand, B. A. et al., <i>ChemSusChem</i> 9, 302–313 (2016)          | 2016 | TiO2 | mTiO2 | MAPbI3-xClx                | two-step | spin      | no | DMF | Cu2O         | no     | 8.9  |
| Nejand, B. A. et al., <i>ChemSusChem</i> 9, 302–313 (2016)          | 2016 | TiO2 | mTiO2 | MAPbI3-xClx                | two-step | vasp      | no | DMF | spiro-OMeTAD | Li+TBP | 11.5 |
| Nejand, B. A. et al., <i>J. Phys. Chem. C</i> 120, 2520–2528 (2016) | 2016 | TiO2 | 0     | MAPbI3-xClx                | one-step | sprayroll | no | DMF | spiro-OMeTAD | Li+TBP | 13.2 |
| Nejand, B. A. et al., <i>J. Phys. Chem. C</i> 120, 2520–2528 (2016) | 2016 | TiO2 | 0     | MAPbI3-xClx                | one-step | spray     | no | DMF | spiro-OMeTAD | Li+TBP | 8.2  |

|                                                               |      |      |        |                             |          |          |               |          |              |        |      |
|---------------------------------------------------------------|------|------|--------|-----------------------------|----------|----------|---------------|----------|--------------|--------|------|
| Nejand, B. A. et al., Sci. Rep. 6, 33649 (2016)               | 2016 | TiO2 | mTiO2  | MAPbI3                      | one-step | spin     | no            | DMF      | spiro-OMeTAD | Li+TBP | 11.3 |
| Nejand, B. A. et al., Sci. Rep. 6, 33649 (2016)               | 2016 | TiO2 | mTiO2  | MAPbI3                      | one-step | spray    | no            | na       | spiro-OMeTAD | Li+TBP | 9.1  |
| Niu, G. et al., Nano Energy 27, 87–94 (2016)                  | 2016 | TiO2 | mTiO2  | MAPbI3                      | one-step | spin 2-3 | chlorobenzene | DMSO+GBL | spiro-OMeTAD | Li+TBP | 15.1 |
| Niu, G. et al., Nano Energy 27, 87–94 (2016)                  | 2016 | TiO2 | mTiO2  | (MAPbI3)0.9<br>(CsPbBr3)0.1 | one-step | spin 2-3 | chlorobenzene | DMSO+GBL | spiro-OMeTAD | Li+TBP | 17.6 |
| Nourolahi, H. et al., Sol. Energy 139,475–483 (2016)          | 2016 | TiO2 | mTiO2  | MAPbI3                      | two-step | spin-dip | no            | DMF      | no           | no     | 4.6  |
| Nourolahi, H. et al., Sol. Energy 139, 475–483 (2016)         | 2016 | TiO2 | mTiO2  | MAPbI3                      | two-step | spin-dip | no            | DMF      | no           | no     | 6.2  |
| Pascoe, A. R. et al., Adv. Funct. Mater. 26, 1278–1285 (2016) | 2016 | TiO2 | mTiO2  | MAPbI3                      | one-step | spin     | no            | DMF      | spiro-OMeTAD | Li+TBP | 16.3 |
| Pascoe, A. R. et al., Nano Energy 22, 439–452 (2016)          | 2016 | TiO2 | 0      | MAPbI3                      | one-step | spin     | no            | DMSO+GBL | spiro-OMeTAD | Li+TBP | 14.2 |
| Pascoe, A. R. et al., Nano Energy 22, 439–452 (2016)          | 2016 | TiO2 | 0      | MAPbI3                      | one-step | spin     | no            | DMSO+GBL | spiro-OMeTAD | Li+TBP | 8.8  |
| Pascoe, A. R. et al., Nano Energy 22, 439–452 (2016)          | 2016 | TiO2 | mAl2O3 | MAPbI3                      | one-step | spin     | no            | DMSO+GBL | spiro-OMeTAD | Li+TBP | 10.6 |
| Pascoe, A. R. et al., Nano Energy 22, 439–452 (2016)          | 2016 | TiO2 | mAl2O3 | MAPbI3                      | one-step | spin     | no            | DMSO+GBL | spiro-OMeTAD | Li+TBP | 4.9  |

|                                                                          |      |      |        |                                   |          |          |               |          |              |                  |      |
|--------------------------------------------------------------------------|------|------|--------|-----------------------------------|----------|----------|---------------|----------|--------------|------------------|------|
| Pascoe, A. R. et al., Nano Energy 22, 439–452 (2016)                     | 2016 | TiO2 | mTiO2  | MAPbI3                            | one-step | spin     | no            | DMSO+GBL | spiro-OMeTAD | Li+TBP           | 16   |
| Pascoe, A. R. et al., Nano Energy 22, 439–452 (2016)                     | 2016 | TiO2 | 0      | MAPbI3                            | one-step | spin     | toluene       | DMSO+GBL | spiro-OMeTAD | Li+TBP           | 14   |
| Pascoe, A. R. et al., Nano Energy 22, 439–452 (2016)                     | 2016 | TiO2 | mTiO2  | MAPbI3                            | one-step | spin     | toluene       | DMSO+GBL | spiro-OMeTAD | Li+TBP           | 10.2 |
| Pearson, A. J. et al., Adv. Energy Mater. 6, 1600014 (2016)              | 2016 | TiO2 | mAl2O3 | MAPbI3-xClx                       | one-step | spin     | no            | DMF      | spiro-OMeTAD | Li+TBP           | 11.1 |
| Peng, G. et al., J. Mater. Chem. A 4, 1520–1530 (2016)                   | 2016 | 0    | TiO2   | MAPbI3                            | one-step | spin 2-3 | no            | GBL      | spiro-OMeTAD | Li+TBP           | 12   |
| Peng, G. et al., J. Mater. Chem. A 4, 1520–1530 (2016)                   | 2016 | 0    | TiO2   | MAPbI3                            | one-step | spin 2-3 | no            | GBL      | spiro-OMeTAD | Li+TBP           | 10   |
| Ramirez, D. et al., J. Phys. Chem. C 120, 8559–8567 (2016)               | 2016 | TiO2 | mAl2O3 | MAPbI3-xClx                       | one-step | spin     | no            | DMF      | spiro-OMeTAD | Li+TBP           | 10.9 |
| Rapsomanikis, A. et al., Sol. Energy Mater. Sol. Cells 151, 36–43 (2016) | 2016 | TiO2 | mTiO2  | MAPbI3-xClx                       | one-step | spin 2-3 | no            | DMF      | P3HT         | Li+TBP           | 13.7 |
| Ren, X. et al., Nanoscale 8, 3816–3822 (2016)                            | 2016 | TiO2 | 0      | MAPbI3                            | two-step | vasp     | no            | DMF      | spiro-OMeTAD | Li+TBP           | 12.9 |
| Reyna, Y. et al., Nano Energy 30, 570–579 (2016)                         | 2016 | TiO2 | mTiO2  | (FAPbI3)0.8<br>5<br>(MAPbBr3)0.15 | one-step | spin 2-3 | chlorobenzene | DMF+DMSO | spiro-OMeTAD | Li+TBP+FK<br>209 | 14.6 |
| Saliba, M. et al., Energy Environ. Sci. 9, 1989–1997 (2016)              | 2016 | TiO2 | mTiO2  | Cs5(MA0.17<br>FA0.83)95P          | one-step | spin 2-3 | chlorobenzene | DMF+DMSO | spiro-OMeTAD | Li+TBP+FK<br>209 | 21.2 |

|                                                             |      |      |       |                                              |          |          |               |          |              |                  |      |
|-------------------------------------------------------------|------|------|-------|----------------------------------------------|----------|----------|---------------|----------|--------------|------------------|------|
|                                                             |      |      |       | b<br>(I0.83Br0.17)<br>3                      |          |          |               |          |              |                  |      |
| Saliba, M. et al., Energy Environ. Sci. 9, 1989–1997 (2016) | 2016 | TiO2 | mTiO2 | Cs10(MA0.17FA0.83)90<br>P<br>b(I0.83Br0.17)3 | one-step | spin 2-3 | chlorobenzene | DMF+DMSO | spiro-OMeTAD | Li+TBP+FK<br>209 | 21   |
| Saliba, M. et al., Energy Environ. Sci. 9, 1989–1997 (2016) | 2016 | TiO2 | mTiO2 | (MA0.17FA0.83)100Pb(I0.83Br0.17)3            | one-step | spin 2-3 | chlorobenzene | DMF+DMSO | spiro-OMeTAD | Li+TBP+FK<br>209 | 17.4 |
| Saliba, M. et al., Science 354, 206–209 (2016)              | 2016 | TiO2 | mTiO2 | Rb/Cs/MA/F<br>A cations                      | one-step | spin 2-3 | no            | DMF+DMSO | spiro-OMeTAD | Li+TBP+FK<br>209 | 21.8 |
| Sedighi, R. et al., ChemPhysChem 17, 2382–2388 (2016)       | 2016 | TiO2 | mTiO2 | MAPbI3                                       | two-step | vasp     | no            | DMF      | spiro-OMeTAD | Li+TBP           | 13.5 |
| Sedighi, R. et al., ChemPhysChem 17, 2382–2388 (2016)       | 2016 | TiO2 | mTiO2 | MAPbI3-<br>xBrx                              | two-step | vasp     | no            | DMF      | spiro-OMeTAD | Li+TBP           | 10.5 |
| Sedighi, R. et al., ChemPhysChem 17, 2382–2388 (2016)       | 2016 | TiO2 | mTiO2 | MAPbI3-xClx                                  | two-step | vasp     | no            | DMF      | spiro-OMeTAD | Li+TBP           | 11.6 |
| Seo, M.-S. et al, Nanoscale 8, 11472–11479 (2016)           | 2016 | TiO2 | TiO2  | MAPbI3                                       | two-step | spin     | no            | DMF      | spiro-OMeTAD | Li+TBP           | 15.5 |
| Seo, M.-S. et al, Nanoscale 8, 11472–11479 (2016)           | 2016 | TiO2 | TiO2  | MAPbI3                                       | two-step | spin     | no            | DMF      | spiro-OMeTAD | Li+TBP           | 12.6 |

|                                                               |      |         |        |             |          |          |         |          |              |        |      |
|---------------------------------------------------------------|------|---------|--------|-------------|----------|----------|---------|----------|--------------|--------|------|
| Sfyri, G. et al., Appl. Surf. Sci. 360, 767–771 (2016)        | 2016 | TiO2    | mTiO2  | MAPbI3-xClx | one-step | spin     | no      | DMF      | CuMePc       | no     | 5    |
| Shaikh, S. F. et al., J. Mater. Chem. A 4, 15478–15485 (2016) | 2016 | TiO2    | mTiO2  | MAPbI3      | one-step | spin     | no      | DMF+DMSO | spiro-OMeTAD | Li+TBP | 15.8 |
| Shaikh, S. F. et al., J. Mater. Chem. A 4, 15478–15485 (2016) | 2016 | TiO2    | mTiO2  | MAPbI3      | one-step | spin     | no      | DMF+DMSO | spiro-OMeTAD | Li+TBP | 11.1 |
| Shin, S. S. et al., J. Phys. Chem. Lett. 7, 1845–1851 (2016)  | 2016 | Zn2SnO4 | 0      | MAPbI3      | two-step | spin     | toluene | DMF      | PTAA         | no     | 17.6 |
| Song, J. et al., J. Mater. Chem. A 4, 8435–8443 (2016)        | 2016 | ZnO     | 0      | FAPbI3      | two-step | spin-dip | no      | DMF      | spiro-OMeTAD | Li+TBP | 14.1 |
| Song, J. et al., J. Mater. Chem. A 4, 8435–8443 (2016)        | 2016 | ZnO     | 0      | FAPbI3      | two-step | spin-dip | no      | DMF      | spiro-OMeTAD | Li+TBP | 16.1 |
| Song, J. et al., J. Mater. Chem. A 4, 8435–8443 (2016)        | 2016 | ZnO     | 0      | FAPbI3      | two-step | spin-dip | no      | DMF      | spiro-OMeTAD | Li+TBP | 11   |
| Song, S. et al., Nano Energy 28, 269–276 (2016)               | 2016 | PEIE    | 0      | MAPbI3-xClx | one-step | spin     | no      | DMF      | spiro-OMeTAD | Li+TBP | 11.5 |
| Song, S. et al., Nano Energy 28, 269–276 (2016)               | 2016 | 0       | mAl2O3 | MAPbI3-xClx | one-step | spin     | no      | DMF      | spiro-OMeTAD | Li+TBP | 7.4  |
| Song, S. et al., Nano Energy 28, 269–276 (2016)               | 2016 | TiO2    | mAl2O3 | MAPbI3-xClx | one-step | spin     | no      | DMF      | spiro-OMeTAD | Li+TBP | 11   |
| Song, S. et al., Nano Energy 28, 269–276 (2016)               | 2016 | PEIE    | mAl2O3 | MAPbI3-xClx | one-step | spin     | no      | DMF      | spiro-OMeTAD | Li+TBP | 14.1 |



|                                                                          |      |                  |    |                                      |          |          |    |      |              |        |      |
|--------------------------------------------------------------------------|------|------------------|----|--------------------------------------|----------|----------|----|------|--------------|--------|------|
| Song, S. et al., Nano Energy 28, 269–276<br>(2016)                       | 2016 | no               | no | MAPbI <sub>3</sub> -xCl <sub>x</sub> | one-step | spin     | no | DMF  | spiro-OMeTAD | Li+TBP | 4.7  |
| Song, J. et al., Sol. Energy Mater. Sol. Cells<br>144, 623–630<br>(2016) | 2016 | SnO <sub>2</sub> | 0  | MAPbI <sub>3</sub>                   | two-step | spin-dip | no | DMF  | spiro-OMeTAD | Li+TBP | 12.4 |
| Song, J. et al., Sol. Energy Mater. Sol. Cells<br>144, 623–630<br>(2016) | 2016 | ZnO              | 0  | MAPbI <sub>3</sub>                   | two-step | spin-dip | no | DMF  | spiro-OMeTAD | Li+TBP | 13.9 |
| Song, J. et al., Sol. Energy Mater. Sol. Cells<br>144, 623–630<br>(2016) | 2016 | SnO <sub>2</sub> | 0  | MAPbI <sub>3</sub>                   | two-step | spin-dip | no | DMF  | spiro-OMeTAD | Li+TBP | 14.3 |
| Song, D. H. et al., J. Power Sources 310,<br>130–136 (2016)              | 2016 | TiO <sub>2</sub> | 0  | MAPbI <sub>3</sub> -xCl <sub>x</sub> | one-step | spin 2-3 | no | DMSO | PTAA         | Li+TBP | 11.6 |
| Song, D. H. et al., J. Power Sources 310,<br>130–136 (2016)              | 2016 | TiO <sub>2</sub> | 0  | MAPbI <sub>3</sub> -xCl <sub>x</sub> | one-step | spin 2-3 | no | DMSO | PTAA         | Li+TBP | 15.6 |
| Su, P. Y. et al., Electrochim. Acta 209, 529–<br>540 (2016)              | 2016 | TiO <sub>2</sub> | 0  | MAPbI <sub>3</sub>                   | one-step | spin     | no | DMF  | SP-no1-Co    | no     | 13.9 |
| Su, P. Y. et al., Electrochim. Acta 209, 529–<br>540 (2016)              | 2016 | TiO <sub>2</sub> | 0  | MAPbI <sub>3</sub>                   | one-step | spin     | no | DMF  | SP-no1       | no     | 12.4 |
| Su, P. Y. et al., Electrochim. Acta 209, 529–<br>540 (2016)              | 2016 | TiO <sub>2</sub> | 0  | MAPbI <sub>3</sub>                   | one-step | spin     | no | DMF  | H1no1        | no     | 11.6 |
| Su, P. Y. et al., Electrochim. Acta<br>209, 529–540 (2016)               | 2016 | TiO <sub>2</sub> | 0  | MAPbI <sub>3</sub>                   | one-step | spin     | no | DMF  | SP-no2       | no     | 6.5  |

|                                                                            |      |                  |                   |                                 |          |          |         |          |              |                  |      |
|----------------------------------------------------------------------------|------|------------------|-------------------|---------------------------------|----------|----------|---------|----------|--------------|------------------|------|
| Su, P. Y. et al., <i>Electrochim. Acta</i> 209, 529–540 (2016)             | 2016 | TiO <sub>2</sub> | 0                 | MAPbI <sub>3</sub>              | one-step | spin     | no      | DMF      | spiro-OMeTAD | Li+TBP+FK<br>102 | 14.7 |
| Su, P. Y. et al., <i>Electrochim. Acta</i> 209, 529–540 (2016)             | 2016 | TiO <sub>2</sub> | 0                 | MAPbI <sub>3</sub>              | one-step | spin     | no      | DMF      | spiro-OMeTAD | Li+TBP+FK<br>102 | 13   |
| Supasai, T. et al., <i>Sol. Energy</i> 136, 515–524 (2016)                 | 2016 | TiO <sub>2</sub> | mTiO <sub>2</sub> | MAPbI <sub>3</sub>              | two-step | spin-dip | no      | DMF      | P3HT         | no               | 6.5  |
| Tai, Q. et al., <i>Nat. Commun.</i> 7, 11105 (2016)                        | 2016 | TiO <sub>2</sub> | mTiO <sub>2</sub> | MAPbI <sub>3</sub>              | two-step | spin     | no      | DMF      | spiro-OMeTAD | Li+TBP           | 15.3 |
| Tai, Q. et al., <i>Nat. Commun.</i> 7, 11105 (2016)                        | 2016 | TiO <sub>2</sub> | mTiO <sub>2</sub> | MAPb(SCN)<br>xI <sub>3</sub> -x | two-step | spin     | no      | DMSO     | spiro-OMeTAD | Li+TBP           | 15.1 |
| Tai, Q. et al., <i>Nat. Commun.</i> 7, 11105 (2016)                        | 2016 | TiO <sub>2</sub> | mTiO <sub>2</sub> | MAPbI <sub>3</sub>              | two-step | spin     | no      | DMSO     | spiro-OMeTAD | Li+TBP           | 8.8  |
| Tai, Q. et al., <i>Nat. Commun.</i> 7, 11105 (2016)                        | 2016 | TiO <sub>2</sub> | mTiO <sub>2</sub> | MAPbI <sub>3</sub>              | two-step | spin     | no      | DMSO     | spiro-OMeTAD | Li+TBP           | 12.4 |
| Tang, J. F. et al., <i>Sol. Energy Mater. Sol. Cells</i> 154, 18–22 (2016) | 2016 | ZnO              | 0                 | MAPbI <sub>3</sub>              | one-step | spin     | toluene | DMSO+GBL | spiro-OMeTAD | Li+TBP           | 11.3 |
| Tang, J. F. et al., <i>Sol. Energy Mater. Sol. Cells</i> 154, 18–22 (2016) | 2016 | 0                | cZnO-nanowire     | MAPbI <sub>3</sub>              | one-step | spin     | toluene | DMSO+GBL | spiro-OMeTAD | Li+TBP           | 13.6 |
| Tavakoli, M. M. et al., <i>J. Phys. Chem. C</i> 120, 19531–19536 (2016)    | 2016 | TiO <sub>2</sub> | 0                 | MAPbI <sub>3</sub>              | two-step | spin-dip | no      | DMF      | spiro-OMeTAD | Li+TBP           | 13.5 |
| Tavakoli, M. M. et al., <i>J. Phys. Chem. C</i> 120, 19531–19536 (2016)    | 2016 | TiO <sub>2</sub> | Rgs               | MAPbI <sub>3</sub>              | two-step | spin-dip | no      | DMF      | spiro-OMeTAD | Li+TBP           | 17.2 |

|                                                                                 |      |      |                 |             |          |          |    |     |              |        |      |
|---------------------------------------------------------------------------------|------|------|-----------------|-------------|----------|----------|----|-----|--------------|--------|------|
| Tavakoli, M. M. et al.,<br>J. Phys. Chem. C 120, 19531–19536 (2016)             | 2016 | TiO2 | 2D-<br>graphene | MAPbI3      | two-step | spin-dip | no | DMF | spiro-OMeTAD | Li+TBP | 15.3 |
| Tseng, Z.-L. et al., Nano Energy 28,<br>311–318 (2016)                          | 2016 | ZnO  | 0               | MAPbI3      | two-step | spin     | no | DMF | spiro-OMeTAD | Li+TBP | 15.1 |
| Tseng, Z.-L. et al., Nano Energy 28,<br>311–318 (2016)                          | 2016 | AZO  | 0               | MAPbI3      | two-step | spin     | no | DMF | spiro-OMeTAD | Li+TBP | 17.6 |
| Wang, J. et al., Electrochim. Acta 210, 673–<br>680 (2016)                      | 2016 | TiO2 | mTiO2           | MAPbI3      | one-step | spin     | no | DMF | HBZ-7no      | no     | 4.5  |
| Wang, J. et al., Electrochim. Acta 210, 673–<br>680 (2016)                      | 2016 | TiO2 | mTiO2           | MAPbI3      | one-step | spin     | no | DMF | spiro-OMeTAD | Li+TBP | 5.1  |
| Wang, Z. et al., Org. Electron. physics, Mater.<br>Appl. 33, 142–<br>149 (2016) | 2016 | TiO2 | 0               | MAPbI3-xClx | one-step | spin     | no | DMF | PDTSTTz-4    | Li+TBP | 13.9 |
| Wang, Z. et al., Org. Electron. physics, Mater.<br>Appl. 33, 142–<br>149 (2016) | 2016 | TiO2 | 0               | MAPbI3-xClx | one-step | spin     | no | DMF | PDTSTTz      | Li+TBP | 13.3 |
| Wang, Z. et al., Org. Electron. physics, Mater.<br>Appl. 33, 142–<br>149 (2016) | 2016 | TiO2 | C60             | MAPbI3-xClx | one-step | spin     | no | DMF | PDTSTTz-4    | Li+TBP | 15.8 |
| Wang, Z. et al., Org. Electron. physics, Mater.<br>Appl. 33, 142–<br>149 (2016) | 2016 | TiO2 | C60             | MAPbI3-xClx | one-step | spin     | no | DMF | PDTSTTz      | Li+TBP | 14.4 |
| Wang, Z. et al., Org. Electron. physics, Mater.<br>Appl. 33, 142–<br>149 (2016) | 2016 | TiO2 | 0               | MAPbI3-xClx | one-step | spin     | no | DMF | P3HT         | Li+TBP | 12.5 |

|                                                                          |      |                  |                   |                                      |          |      |    |     |              |                  |      |
|--------------------------------------------------------------------------|------|------------------|-------------------|--------------------------------------|----------|------|----|-----|--------------|------------------|------|
| Wang, Z. et al., Org. Electron. physics, Mater. Appl. 33, 142–149 (2016) | 2016 | TiO <sub>2</sub> | C60               | MAPbI <sub>3</sub> -xCl <sub>x</sub> | one-step | spin | no | DMF | P3HT         | Li+TBP           | 14.3 |
| Wang, Z. et al., Org. Electron. physics, Mater. Appl. 33, 142–149 (2016) | 2016 | TiO <sub>2</sub> | 0                 | MAPbI <sub>3</sub> -xCl <sub>x</sub> | one-step | spin | no | DMF | spiro-OMeTAD | Li+TBP           | 11.9 |
| Wang, Z. et al., Org. Electron. physics, Mater. Appl. 33, 142–149 (2016) | 2016 | TiO <sub>2</sub> | C60               | MAPbI <sub>3</sub> -xCl <sub>x</sub> | one-step | spin | no | DMF | spiro-OMeTAD | Li+TBP           | 13.6 |
| Wang, S. et al., Nanoscale 8, 6600–6608 (2016)                           | 2016 | TiO <sub>2</sub> | mTiO <sub>2</sub> | MAPbI <sub>3</sub>                   | two-step | spin | no | DMF | spiro-OMeTAD | Li+TBP+FK<br>102 | 12   |
| Wang, S. et al., Nanoscale 8, 6600–6608 (2016)                           | 2016 | TiO <sub>2</sub> | mTiO <sub>2</sub> | MAPbI <sub>3</sub>                   | two-step | spin | no | DMF | spiro-OMeTAD | Li+TBP+FK<br>102 | 14.6 |
| Wang, S. et al., Nanoscale 8, 6600–6608 (2016)                           | 2016 | TiO <sub>2</sub> | mTiO <sub>2</sub> | MAPbI <sub>3</sub>                   | two-step | spin | no | DMF | spiro-OMeTAD | Li+TBP+FK<br>102 | 12.2 |
| Wang, S. et al., Nanoscale 8, 6600–6608 (2016)                           | 2016 | TiO <sub>2</sub> | mTiO <sub>2</sub> | MAPbI <sub>3</sub>                   | two-step | spin | no | DMF | spiro-OMeTAD | Li+TBP+FK<br>102 | 10.1 |
| Wang, S. et al., Nanoscale 8, 6600–6608 (2016)                           | 2016 | TiO <sub>2</sub> | mTiO <sub>2</sub> | MAPbI <sub>3</sub>                   | two-step | spin | no | DMF | spiro-OMeTAD | Li+TBP+FK<br>102 | 7.3  |
| Wang, S. et al., Nanoscale 8, 6600–6608 (2016)                           | 2016 | TiO <sub>2</sub> | mTiO <sub>2</sub> | MAPbI <sub>3</sub>                   | two-step | spin | no | DMF | spiro-OMeTAD | Li+TBP+FK<br>102 | 6.8  |
| Wang, W. et al., Nanoscale Res. Lett. 11, 316 (2016)                     | 2016 | TiO <sub>2</sub> | mTiO <sub>2</sub> | MAPbI <sub>3</sub> -xCl <sub>x</sub> | one-step | spin | no | DMF | spiro-OMeTAD | no               | 12.4 |

|                                                                              |      |      |       |             |          |          |               |             |              |        |      |
|------------------------------------------------------------------------------|------|------|-------|-------------|----------|----------|---------------|-------------|--------------|--------|------|
| Wang, W. et al., <i>Nanoscale Res. Lett.</i> 11, 316 (2016)                  | 2016 | TiO2 | mTiO2 | MAPbI3-xClx | one-step | spin     | no            | DMF         | spiro-OMeTAD | no     | 10.6 |
| Wang, F. et al., <i>Nanoscale</i> 8, 11882–11888 (2016)                      | 2016 | TiO2 | no    | MAPbI3      | one-step | spin     | toluene       | DMSO        | SWNT-GO      | no     | 11.7 |
| Wang, F. et al., <i>Nanoscale</i> 8, 11882–11888 (2016)                      | 2016 | TiO2 | no    | MAPbI3      | one-step | spin     | toluene       | DMSO        | spiro-OMeTAD | Li+TBP | 12.1 |
| Wang, F. et al., <i>Adv. Mater.</i> 28, 9986–9992 (2016)                     | 2016 | TiO2 | 0     | FAPbI3      | one-step | spin 2-3 | chlorobenzene | DMF         | spiro-OMeTAD | Li+TBP | 19.2 |
| Wang, F. et al., <i>Adv. Mater.</i> 28, 9986–9992 (2016)                     | 2016 | TiO2 | 0     | FAPbI3      | one-step | spin 2-3 | chlorobenzene | DMF         | spiro-OMeTAD | Li+TBP | 11.8 |
| Wang, W. et al., <i>J. Mater. Sci. Mater. Electron.</i> 27, 9384–9390 (2016) | 2016 | TiO2 | 0     | MAPbI3-xClx | one-step | spin 2-3 | no            | DMF         | spiro-OMeTAD | Li+TBP | 11.9 |
| Wang, W. et al., <i>J. Mater. Sci. Mater. Electron.</i> 27, 9384–9390 (2016) | 2016 | TiO2 | 0     | MAPbI3-xClx | one-step | spin 2-3 | no            | DMF+H3PO2   | spiro-OMeTAD | Li+TBP | 12.4 |
| Wei, Q. et al., <i>RSC Adv.</i> 6, 56807–56811 (2016)                        | 2016 | TiO2 | 0     | FAPbI3      | one-step | spin     | no            | DMSO+GBL    | spiro-OMeTAD | Li+TBP | 14.3 |
| Wei, Q. et al., <i>RSC Adv.</i> 6, 56807–56811 (2016)                        | 2016 | TiO2 | 0     | FAPbI3      | one-step | spin     | no            | DMSO+GBL+CN | spiro-OMeTAD | Li+TBP | 16.5 |
| Wei, J. et al., <i>Nano Energy</i> 26, 139–147 (2016)                        | 2016 | TiO2 | no    | MAPbI3-xClx | one-step | spin     | no            | DMF         | spiro-OMeTAD | Li+TBP | 12.5 |
| Wei, J. et al., <i>Nano Energy</i> 26, 139–147 (2016)                        | 2016 | TiO2 | no    | MAPbI3-xClx | one-step | spin     | no            | DMF+PCBM    | spiro-OMeTAD | Li+TBP | 14.2 |

|                                                         |      |      |       |             |          |              |               |              |              |              |      |
|---------------------------------------------------------|------|------|-------|-------------|----------|--------------|---------------|--------------|--------------|--------------|------|
| Wei, J. et al., Nano Energy 26, 139–147 (2016)          | 2016 | TiO2 | no    | MAPbI3-xClx | one-step | spin         | no            | DMF+PCBM+PEG | spiro-OMeTAD | Li+TBP       | 17.1 |
| Wei, J. et al., Nano Energy 26, 139–147 (2016)          | 2016 | TiO2 | no    | MAPbI3-xClx | one-step | spin         | no            | DMF+PEG      | spiro-OMeTAD | Li+TBP       | 16.3 |
| Wei, Q. et al., Sol. Energy 135, 654–661 (2016)         | 2016 | no   | no    | MAPbI3      | one-step | spin         | chlorobenzene | DMSO+GBL     | spiro-OMeTAD | Li+TBP       | 10.2 |
| Wei, Q. et al., Sol. Energy 135, 654–661 (2016)         | 2016 | no   | no    | MAPbI3      | one-step | spin         | chlorobenzene | DMSO+GBL     | spiro-OMeTAD | Li+TBP       | 10.1 |
| Wei, Q. et al., Sol. Energy 135, 654–661 (2016)         | 2016 | no   | no    | MAPbI3      | one-step | spin         | chlorobenzene | DMSO+GBL     | spiro-OMeTAD | Li+TBP       | 10   |
| Wu, C. et al., J. Phys. Chem. C 120, 26710–26719 (2016) | 2016 | TiO2 | 0     | FAPbI3-xBrx | two-step | spin         | no            | NMP          | spiro-OMeTAD | Li+TBP+FK209 | 14   |
| Wu, C. et al., J. Phys. Chem. C 120, 26710–26719 (2016) | 2016 | TiO2 | mTiO2 | FAPbI3-xBrx | two-step | spin         | no            | NMP          | spiro-OMeTAD | Li+TBP+FK209 | 15.5 |
| Wu, W. Q. et al., J. Power Sources 329, 17–22 (2016)    | 2016 | no   | no    | MAPbI3      | one-step | spin         | no            | DMF          | spiro-OMeTAD | Li+TBP       | 2.7  |
| Wu, W. Q. et al., J. Power Sources 329, 17–22 (2016)    | 2016 | 0    | TiO2  | MAPbI3      | one-step | spin         | no            | DMF          | spiro-OMeTAD | Li+TBP       | 14.7 |
| Xiao, Y. et al., J. Power Sources 306, 171–177 (2016)   | 2016 | TiO2 | 0     | MAPbI3      | two-step | spin 2-3-dip | no            | GBL          | PEDOT        | no           | 12.4 |
| Xiong, H. et al., J. Mater. Chem. C 4, 6848–6854 (2016) | 2016 | TiO2 | mTiO2 | MAPbI3      | two-step | spin         | no            | DMF          | spiro-OMeTAD | no           | 12.4 |

|                                                                   |      |      |       |             |          |          |                             |            |              |              |      |
|-------------------------------------------------------------------|------|------|-------|-------------|----------|----------|-----------------------------|------------|--------------|--------------|------|
| Xiong, H. et al., J. Mater. Chem. C 4, 6848–6854 (2016)           | 2016 | TiO2 | mTiO2 | MAPbI3      | two-step | spin     | no                          | DMF        | spiro-OMeTAD | no           | 11.3 |
| Yan, J.-J. et al., Superlattices Microstruct. 94, 196–203 (2016)  | 2016 | TiO2 | 0     | MAPbI3      | two-step | spin-dip | no                          | DMF        | P3HT         | Li+TBP       | 8.6  |
| Yang, Y. et al., J. Alloys Compd. 684, 84–90 (2016)               | 2016 | TiO2 | mTiO2 | MAPbI3      | one-step | spin     | no                          | DMF        | spiro-OMeTAD | Li+TBP       | 6.8  |
| Yang, Y. et al., J. Alloys Compd. 684, 84–90 (2016)               | 2016 | TiO2 | mTiO2 | MAPbI3      | one-step | spin     | no                          | DMF+BAI    | spiro-OMeTAD | Li+TBP       | 9.1  |
| Yang, Y. et al., J. Alloys Compd. 684, 84–90 (2016)               | 2016 | TiO2 | mTiO2 | MAPbI3      | one-step | spin     | no                          | DMF+NH4I   | spiro-OMeTAD | Li+TBP       | 9.5  |
| Yang, S. et al., J. Mater. Chem. A 4, 9430–9436 (2016)            | 2016 | TiO2 | 0     | FAPbI3      | one-step | spin     | no                          | DMF        | spiro-OMeTAD | Li+TBP       | 5.9  |
| Yang, S. et al., J. Mater. Chem. A 4, 9430–9436 (2016)            | 2016 | TiO2 | 0     | FAPbI3      | one-step | spin     | no                          | DMF+NH4SCN | spiro-OMeTAD | Li+TBP       | 11.4 |
| Ahmadian-Yazdi, M. R. et al., Nanoscale Res. Lett. 11, 408 (2016) | 2016 | TiO2 | 0     | MAPbI3-xClx | two-step | spin-dip | no                          | DMF+DMSO   | spiro-OMeTAD | Li+TBP       | 3.5  |
| Ahmadian-Yazdi, M. R. et al., Nanoscale Res. Lett. 11, 408 (2016) | 2016 | TiO2 | 0     | MAPbI3-xClx | one-step | spin 2-3 | toluene                     | DMSO       | spiro-OMeTAD | Li+TBP       | 7.3  |
| Ye, J. et al., Sol. Energy 136, 505–514 (2016)                    | 2016 | TiO2 | mTiO2 | MAPbI3      | one-step | spin 2-3 | no                          | DMF+DMSO   | spiro-OMeTAD | Li+TBP+FK209 | 15.9 |
| Ye, J. et al., Sol. Energy 136, 505–514 (2016)                    | 2016 | TiO2 | mTiO2 | MAPbI3      | one-step | spin 2-3 | chlorobenzene +acetonitrile | DMF+DMSO   | spiro-OMeTAD | Li+TBP+FK209 | 18.3 |

|                                                                   |      |         |         |                |          |          |               |          |              |        |      |
|-------------------------------------------------------------------|------|---------|---------|----------------|----------|----------|---------------|----------|--------------|--------|------|
| Ye, J. et al., RSC Adv. 6, 36356–36361 (2016)                     | 2016 | TiO2    | mTiO2   | MAPbI3         | two-step | spin-dip | no            | DMF      | P3HT         | no     | 13.8 |
| Ye, J. et al., RSC Adv. 6, 36356–36361 (2016)                     | 2016 | TiO2    | mTiO2   | MAPbI3         | two-step | spin-dip | no            | DMF      | P3HT         | no     | 8.2  |
| Yi, Y. et al., RSC Adv. 6, 82759–82762 (2016)                     | 2016 | TiO2    | mTiO2   | MAPbI3         | one-step | spin     | no            | DMF      | no           | no     | 4.4  |
| Yi, Y. et al., RSC Adv. 6, 82759–82762 (2016)                     | 2016 | TiO2    | mTiO2   | MAPbI3         | one-step | spin     | no            | DMF      | no           | no     | 0.1  |
| Yin, X. et al., ACS Appl. Mater. Interfaces 8, 29580–29587 (2016) | 2016 | TiZn2O4 | 0       | MAPbI3-xClx    | one-step | spin     | no            | DMF      | spiro-OMeTAD | Li+TBP | 15.1 |
| Yoon, H. et al., Energy Environ. Sci. 9, 2262–2266 (2016)         | 2016 | BCP     | C60     | MAPbI3         | one-step | spin     | diethyl ether | DMF+DMSO | spiro-OMeTAD | Li+TBP | 19.1 |
| Yu, X. et al., J. Power Sources 325, 534–540 (2016)               | 2016 | TiO2    | mAl2O3  | MAPbI3-xClx    | one-step | spin     | no            | DMF      | spiro-OMeTAD | no     | 10.5 |
| Yu, X. et al., J. Power Sources 325, 534–540 (2016)               | 2016 | TiO2    | mTiO2   | MAPbI3-xClx    | one-step | spin     | no            | DMF      | spiro-OMeTAD | no     | 10.7 |
| Yu, X. et al., J. Power Sources 325, 534–540 (2016)               | 2016 | TiO2    | mSiO2   | MAPbI3-xClx    | one-step | spin     | no            | DMF      | spiro-OMeTAD | no     | 15.8 |
| Yu, Y. et al., ChemSusChem 9, 3288–3297 (2016)                    | 2016 | SnO2    | C60-SAM | FAPbI3         | one-step | spin     | no            | DMF+DMSO | spiro-OMeTAD | Li+TBP | 15.2 |
| Yu, Y. et al., ChemSusChem 9, 3288–3297 (2016)                    | 2016 | SnO2    | C60-SAM | FA0.8Cs0.2PbI3 | one-step | spin     | no            | DMF+DMSO | spiro-OMeTAD | Li+TBP | 19.6 |



|                                                                    |      |      |          |                        |          |          |               |          |              |        |      |
|--------------------------------------------------------------------|------|------|----------|------------------------|----------|----------|---------------|----------|--------------|--------|------|
| Yu, Y. et al., ChemSusChem 9, 3288–3297 (2016)                     | 2016 | SnO2 | C60- SAM | FA0.8Cs0.2<br>P<br>bl3 | one-step | spin     | no            | DMF+DMSO | spiro-OMeTAD | Li+TBP | 17.6 |
| Yu, M. et al., Chem. Phys. Lett. 662, 257–262 (2016)               | 2016 | TiO2 | 0        | MAPbI3                 | one-step | spin     | no            | DMF      | spiro-OMeTAD | Li+TBP | 7.2  |
| Yu, M. et al., Chem. Phys. Lett. 662, 257–262 (2016)               | 2016 | TiO2 | 0        | MAPbI3-xClx            | one-step | spin     | no            | DMF      | spiro-OMeTAD | Li+TBP | 16.4 |
| Yuan, Z. et al., ACS Appl. Mater. Interfaces 8, 34446–34454 (2016) | 2016 | TiO2 | 0        | MAPbI3-xClx            | one-step | spin     | no            | DMF      | spiro-OMeTAD | Li+TBP | 13.8 |
| Yuan, Z. et al., ACS Appl. Mater. Interfaces 8, 34446–34454 (2016) | 2016 | TiO2 | 0        | MAPbI3-xClx            | one-step | spin 2-3 | no            | DMF      | spiro-OMeTAD | Li+TBP | 16.6 |
| Yuan, M. et al., Electrochim. Acta 215, 374–379 (2016)             | 2016 | TiO2 | mTiO2    | MAPbI3                 | two-step | spin     | no            | DMF      | CZTS-QD      | no     | 10.7 |
| Yuan, M. et al., Electrochim. Acta 215, 374–379 (2016)             | 2016 | TiO2 | mTiO2    | MAPbI3                 | two-step | spin     | no            | DMF      | CZTSe-QD     | no     | 9.7  |
| Yuan, S. et al., RSC Adv. 6, 47459–47467 (2016)                    | 2016 | TiO2 | PCBM     | MAPbI3                 | two-step | vasp     | no            | na       | spiro-OMeTAD | Li+TBP | 15.6 |
| Zhang, Y. et al., Chem. Commun. 52, 5674–5677 (2016)               | 2016 | TiO2 | mTiO2    | MAPbI3                 | one-step | spin     | chlorobenzene | DMF      | spiro-OMeTAD | Li+TBP | 12.5 |
| Zhang, Y. et al., Chem. Commun. 52, 5674–5677 (2016)               | 2016 | TiO2 | mTiO2    | MAPbI3                 | one-step | spin     | chlorobenzene | DMF+CNT  | spiro-OMeTAD | Li+TBP | 10.3 |

|                                                         |      |      |       |             |          |          |               |           |              |        |      |
|---------------------------------------------------------|------|------|-------|-------------|----------|----------|---------------|-----------|--------------|--------|------|
| Zhang, Y. et al., Chem. Commun. 52, 5674–5677 (2016)    | 2016 | TiO2 | mTiO2 | MAPbI3      | one-step | spin     | chlorobenzene | DMF+s-CNT | spiro-OMeTAD | Li+TBP | 15.2 |
| Zhang, F. et al., Synth. Met. 220, 187–193 (2016)       | 2016 | TiO2 | mTiO2 | MAPbI3      | two-step | spin-dip | no            | DMF       | spiro-OMeTAD | Li+TBP | 14   |
| Zhang, F. et al., Synth. Met. 220, 187–193 (2016)       | 2016 | TiO2 | mTiO2 | MAPbI3      | two-step | spin-dip | no            | DMF       | spiro-OMeTAD | Li+TBP | 13.6 |
| Zhang, F. et al., Synth. Met. 220, 187–193 (2016)       | 2016 | TiO2 | mTiO2 | MAPbI3      | two-step | spin-dip | no            | DMF       | spiro-OMeTAD | Li+TBP | 10.6 |
| Zhang, F. et al., Chem. Mater. 28, 802–812 (2016)       | 2016 | TiO2 | mTiO2 | MAPbI3-xClx | one-step | spin     | no            | DMF       | spiro-OMeTAD | Li+TBP | 10.6 |
| Zhang, F. et al., Chem. Mater. 28, 802–812 (2016)       | 2016 | TiO2 | mTiO2 | MAPbI3-xClx | one-step | spin     | no            | DMF       | spiro-OMeTAD | Li+TBP | 10.6 |
| Zhang, F. et al., Chem. Mater. 28, 802–812 (2016)       | 2016 | TiO2 | mTiO2 | MAPbI3-xClx | two-step | spin     | no            | DMF       | spiro-OMeTAD | Li+TBP | 5.8  |
| Zhang, F. et al., Chem. Mater. 28, 802–812 (2016)       | 2016 | TiO2 | mTiO2 | MAPbI3-xClx | two-step | spin     | no            | DMF       | spiro-OMeTAD | Li+TBP | 5    |
| Zhang, H. et al., J. Mater. Chem. A 4, 8724–8733 (2016) | 2016 | PDI  | 0     | MAPbI3-xClx | one-step | spin     | chlorobenzene | DMF+DMSO  | spiro-OMeTAD | Li+TBP | 17.7 |
| Zhang, H. et al., J. Mater. Chem. A 4, 8724–8733 (2016) | 2016 | no   | no    | MAPbI3-xClx | one-step | spin     | chlorobenzene | DMF+DMSO  | spiro-OMeTAD | Li+TBP | 12.9 |
| Zhang, X. et al., J. Alloys Compd. 681, 191–196 (2016)  | 2016 | TiO2 | mTiO2 | MAPbI3      | two-step | spin     | no            | DMF       | spiro-OMeTAD | no     | 8.6  |

|                                                                            |      |      |       |             |          |      |    |         |              |                  |      |
|----------------------------------------------------------------------------|------|------|-------|-------------|----------|------|----|---------|--------------|------------------|------|
| Zhang, X. et al., J. Alloys Compd. 681, 191–196 (2016)                     | 2016 | TiO2 | mTiO2 | MAPbI3      | two-step | spin | no | DMF     | spiro-OMeTAD | no               | 12.1 |
| Zhang, C. Z. et al., Opt. Quantum Electron. 48, 550 (2016)                 | 2016 | TiO2 | 0     | MAPbI3-xClx | one-step | spin | no | DMF     | spiro-OMeTAD | Li+TBP           | 10.4 |
| Zhao, B. G. et al., J. Mater. Sci. Mater. Electron. 27, 10869–10876 (2016) | 2016 | TiO2 | mTiO2 | MAPbI3-xClx | one-step | spin | no | DMF     | spiro-OMeTAD | Li+TBP           | 13.1 |
| Zhao, B. G. et al., J. Mater. Sci. Mater. Electron. 27, 10869–10876 (2016) | 2016 | TiO2 | mTiO2 | MAPbI3-xClx | one-step | spin | no | DMF     | spiro-OMeTAD | Li+TBP           | 10.3 |
| Zhao, Q. et al., Sci. Rep. 6, 38670 (2016)                                 | 2016 | TiO2 | 0     | MAPbI3      | one-step | spin | no | DMF     | spiro-OMeTAD | Li+TBP           | 13   |
| Zhao, Q. et al., Sci. Rep. 6, 38670 (2016)                                 | 2016 | TiO2 | 0     | MAPbI3      | one-step | spin | no | DMF+HAc | spiro-OMeTAD | Li+TBP           | 14.7 |
| Zhou, Z. et al., RSC Adv. 6, 78585–78594 (2016)                            | 2016 | TiO2 | 0     | MAPbI3      | two-step | vasp | no | DMF     | spiro-OMeTAD | Li+TBP+FK<br>209 | 10.6 |
| Zhou, Z. et al., RSC Adv. 6, 78585–78594 (2016)                            | 2016 | TiO2 | C60   | MAPbI3      | two-step | vasp | no | DMF     | spiro-OMeTAD | Li+TBP+FK<br>209 | 16.6 |
| Zhou, Z. et al., Chem. Commun. 52, 3828–3831 (2016)                        | 2016 | TiO2 | mTiO2 | MAPbI3      | two-step | vasp | no | DMF     | spiro-OMeTAD | Li+TBP           | 14.8 |
| Zhou, Z. et al., Chem. Commun. 52, 3828–3831 (2016)                        | 2016 | TiO2 | mTiO2 | FAPbI3      | two-step | vasp | no | DMF     | spiro-OMeTAD | Li+TBP           | 12.4 |

|                                                                      |      |        |       |             |          |           |               |          |              |        |      |
|----------------------------------------------------------------------|------|--------|-------|-------------|----------|-----------|---------------|----------|--------------|--------|------|
| Zhou, P. et al., Sol. Energy 137, 579–584 (2016)                     | 2016 | TiO2   | SnO2  | MAPbI3      | two-step | spin      | no            | DMF      | spiro-OMeTAD | Li+TBP | 9.2  |
| Zuo, L. et al., J. Am. Chem. Soc. 138, 15710–15716 (2016)            | 2016 | SnO2   | 0     | MAPbI3-xClx | two-step | spin-drip | no            | DMF      | spiro-OMeTAD | Li+TBP | 19.2 |
| Zuo, L. et al., J. Am. Chem. Soc. 138, 15710–15716 (2016)            | 2016 | SnO2   | 0     | MAPbI3-xClx | two-step | spin-drip | no            | DMF      | spiro-OMeTAD | Li+TBP | 18.2 |
| Zuo, L. et al., J. Am. Chem. Soc. 138, 15710–15716 (2016)            | 2016 | SnO2   | 0     | MAPbI3-xClx | two-step | spin-drip | no            | DMF      | spiro-OMeTAD | Li+TBP | 17.3 |
| Aeineh, N. et al., ACS Appl. Mater. Interfaces 9, 13181–13187 (2017) | 2017 | TiO2   | mTiO2 | MAPbI3      | one-step | spin      | diethyl ether | DMF+DMSO | spiro-OMeTAD | Li+TBP | 16.4 |
| Aeineh, N. et al., ACS Appl. Mater. Interfaces 9, 13181–13187 (2017) | 2017 | TiO2   | mTiO2 | MAPbI3      | one-step | spin      | diethyl ether | DMF+DMSO | spiro-OMeTAD | Li+TBP | 16.2 |
| Aeineh, N. et al., ACS Appl. Mater. Interfaces 9, 13181–13187 (2017) | 2017 | TiO2   | mTiO2 | MAPbI3      | one-step | spin      | diethyl ether | DMF+DMSO | spiro-OMeTAD | Li+TBP | 17.6 |
| An, Q. et al., Nano Energy 39, 400–408 (2017)                        | 2017 | ZnO    | 0     | MAPbI3      | one-step | spin      | no            | DMF+HP   | spiro-OMeTAD | Li+TBP | 6.5  |
| An, Q. et al., Nano Energy 39, 400–408 (2017)                        | 2017 | ZnO-Li | 0     | MAPbI3      | one-step | spin      | no            | DMF+HP   | spiro-OMeTAD | Li+TBP | 9.6  |
| An, Q. et al., Nano Energy 39, 400–408 (2017)                        | 2017 | ZnO-Cs | 0     | MAPbI3      | one-step | spin      | no            | DMF+HP   | spiro-OMeTAD | Li+TBP | 9.5  |

|                                                                              |      |        |       |                             |          |          |               |          |              |               |      |
|------------------------------------------------------------------------------|------|--------|-------|-----------------------------|----------|----------|---------------|----------|--------------|---------------|------|
| An, Q. et al., Nano Energy 39, 400–408 (2017)                                | 2017 | ZnO    | PCBA  | MAPbI3                      | one-step | spin     | no            | DMF+HP   | spiro-OMeTAD | Li+TBP        | 15.5 |
| An, Q. et al., Nano Energy 39, 400–408 (2017)                                | 2017 | ZnO-Li | PCBA  | MAPbI3                      | one-step | spin     | no            | DMF+HP   | spiro-OMeTAD | Li+TBP        | 18.5 |
| An, Q. et al., Nano Energy 39, 400–408 (2017)                                | 2017 | ZnO-Cs | PCBA  | MAPbI3                      | one-step | spin     | no            | DMF+HP   | spiro-OMeTAD | Li+TBP        | 17.5 |
| Apostolopoulou, A. et al., Sol. Energy Mater. Sol. Cells 166, 100–107 (2017) | 2017 | TiO2   | mTiO2 | MAPbI3-xClx                 | one-step | spin     | no            | DMF      | P3HT         | Li+TBP        | 12.9 |
| Apostolopoulou, A. et al., Sol. Energy Mater. Sol. Cells 166, 100–107 (2017) | 2017 | TiO2   | mTiO2 | MAPbI3-xClx                 | one-step | spin     | no            | DMF      | P3HT         | Li+TBP        | 10   |
| Barbé, J. et al., ACS Appl. Mater. Interfaces 9, 11828–11836 (2017)          | 2017 | TiO2   | 0     | MAPbI3                      | one-step | spin 2-3 | chlorobenzene | DMSO+GBL | spiro-OMeTAD | Li+TBP+FK 102 | 12.8 |
| Barbé, J. et al., ACS Appl. Mater. Interfaces 9, 11828–11836 (2017)          | 2017 | SnO2   | PCBM  | MAPbI3                      | one-step | spin 2-3 | chlorobenzene | DMSO+GBL | spiro-OMeTAD | Li+TBP+FK 102 | 14.8 |
| Batmunkh, M. et al., ChemSusChem 10, 3750–3753 (2017)                        | 2017 | TiO2   | mTiO2 | CsI, FAI, PbI2, MABr, PbBr2 | one-step | spin 2-3 | chlorobenzene | DMF+DMSO | spiro-OMeTAD | Li+TBP+FK 102 | 15.2 |
| Batmunkh, M. et al., ChemSusChem 10, 3750–3753 (2017)                        | 2017 | TiO2   | mTiO2 | CsI, FAI, PbI2, MABr, PbBr2 | one-step | spin 2-3 | chlorobenzene | DMF+DMSO | spiro-OMeTAD | Li+TBP+FK 102 | 17.7 |
| Batmunkh, M. et al., ACS Appl. Mater. Interfaces 9, 19945–19954 (2017)       | 2017 | TiO2   | mTiO2 | MAPbI3                      | one-step | spin 2-3 | chlorobenzene | DMSO     | spiro-OMeTAD | Li+TBP+FK 102 | 13.5 |

|                                                                        |      |      |         |        |          |           |               |          |              |               |      |
|------------------------------------------------------------------------|------|------|---------|--------|----------|-----------|---------------|----------|--------------|---------------|------|
| Batmunkh, M. et al., ACS Appl. Mater. Interfaces 9, 19945–19954 (2017) | 2017 | TiO2 | TiO2    | MAPbI3 | one-step | spin 2-3  | chlorobenzene | DMSO     | spiro-OMeTAD | Li+TBP+FK 102 | 16.1 |
| Cai, F. et al., J. Mater. Chem. A 5, 9402–9411 (2017)                  | 2017 | TiO2 | 0       | MAPbI3 | one-step | spin      | no            | DMF+DMSO | spiro-OMeTAD | Li+TBP        | 17.6 |
| Cai, F. et al., J. Mater. Chem. A 5, 9402–9411 (2017)                  | 2017 | TiO2 | 0       | MAPbI3 | one-step | spin      | no            | DMF+DMSO | spiro-OMeTAD | Li+TBP        | 18.8 |
| Cai, F. et al., J. Mater. Chem. A 5, 9402–9411 (2017)                  | 2017 | TiO2 | C60-ETA | MAPbI3 | one-step | spin      | no            | DMF+DMSO | spiro-OMeTAD | Li+TBP        | 19.6 |
| Cai, F. et al., J. Mater. Chem. A 5, 9402–9411 (2017)                  | 2017 | TiO2 | PCBM    | MAPbI3 | one-step | spin      | no            | DMF+DMSO | spiro-OMeTAD | Li+TBP        | 20.3 |
| Chaudhary, B. et al., ChemSusChem 10, 2473–2479 (2017)                 | 2017 | TiO2 | mTiO2   | MAPbI3 | two-step | spin-dip  | no            | DMF      | spiro-OMeTAD | Li+TBP        | 15.1 |
| Chaudhary, B. et al., ChemSusChem 10, 2473–2479 (2017)                 | 2017 | TiO2 | mTiO2   | MAPbI3 | two-step | spin-dip  | no            | DMF      | spiro-OMeTAD | Li+TBP        | 11.6 |
| Chen, M. et al., Chem. Eng. J. 313, 791–800 (2017)                     | 2017 | TiO2 | mTiO2   | MAPbI3 | two-step | spin-drip | no            | DMF      | no           | no            | 7.9  |
| Chen, M. et al., Chem. Eng. J. 313, 791–800 (2017)                     | 2017 | TiO2 | mTiO2   | MAPbI3 | two-step | spin-drip | no            | DMF      | no           | no            | 7.3  |
| Chen, Z. et al., J. Power Sources 351, 123–129 (2017)                  | 2017 | SnO2 | 0       | MAPbI3 | one-step | spin 2-3  | chlorobenzene | DMF+DMSO | spiro-OMeTAD | Li+TBP        | 7.4  |
| Chen, Z. et al., J. Power Sources 351, 123–129 (2017)                  | 2017 | SnO2 | PCBM    | MAPbI3 | one-step | spin 2-3  | chlorobenzene | DMF+DMSO | spiro-OMeTAD | Li+TBP        | 17.3 |

|                                                                     |      |      |       |                                   |          |          |               |          |              |                         |      |
|---------------------------------------------------------------------|------|------|-------|-----------------------------------|----------|----------|---------------|----------|--------------|-------------------------|------|
| Chen, C. et al., ACS Energy Letters 2, 497–503 (2017)               | 2017 | TiO2 | mTiO2 | (FAPbI3)0.8<br>5<br>(MAPbBr3)0.15 | one-step | spin 2-3 | chlorobenzene | DMF+DMSO | spiro-OMeTAD | Li+TBP                  | 14.8 |
| Chen, C. et al., ACS Energy Letters 2, 497–503 (2017)               | 2017 | TiO2 | mTiO2 | (FAPbI3)0.8<br>5<br>(MAPbBr3)0.15 | one-step | spin 2-3 | chlorobenzene | DMF+DMSO | spiro-OMeTAD | Li+TBP+FK<br>209        | 18.7 |
| Chen, C. et al., ACS Energy Letters 2, 497–503 (2017)               | 2017 | TiO2 | mTiO2 | (FAPbI3)0.8<br>5<br>(MAPbBr3)0.15 | one-step | spin 2-3 | chlorobenzene | DMF+DMSO | spiro-OMeTAD | Li+TBP+Cu(<br>b<br>pcm) | 18.5 |
| Chen, B.-A. et al., ACS Energy Lett. 2, 342–348 (2017)              | 2017 | TiO2 | 0     | MAPbI3                            | one-step | spin     | chlorobenzene | DMF      | spiro-OMeTAD | Li+TBP                  | 14.4 |
| Chen, J. Y. et al., Sol. Energy Mater. Sol. Cells 164, 47–55 (2017) | 2017 | SnO2 | 0     | MAPbI3                            | one-step | spin 2-3 | toluene       | DMSO+GBL | spiro-OMeTAD | Li+TBP                  | 13.9 |
| Chen, J. Y. et al., Sol. Energy Mater. Sol. Cells 164, 47–55 (2017) | 2017 | TiO2 | 0     | MAPbI3                            | one-step | spin 2-3 | toluene       | DMSO+GBL | spiro-OMeTAD | Li+TBP                  | 14.1 |
| Chen, J. Y. et al., Sol. Energy Mater. Sol. Cells 164, 47–55 (2017) | 2017 | TiO2 | C60   | MAPbI3                            | one-step | spin 2-3 | toluene       | DMSO+GBL | spiro-OMeTAD | Li+TBP                  | 15.3 |
| Cheng, N. et al., Electrochim. Acta 246, 990–996 (2017)             | 2017 | TiO2 | mTiO2 | MAPbI3                            | two-step | spin-dip | ethanol       | DMF      | no           | no                      | 12.8 |

|                                                                                                |      |      |       |                      |          |          |               |          |              |        |      |
|------------------------------------------------------------------------------------------------|------|------|-------|----------------------|----------|----------|---------------|----------|--------------|--------|------|
| Cheng, N. et al., <i>Electrochim. Acta</i> 246, 990–996 (2017)                                 | 2017 | TiO2 | mTiO2 | MAPbI3               | two-step | spin-dip | ethanol       | DMF      | CuPc         | no     | 16.6 |
| Cheng, N. et al., <i>Electrochim. Acta</i> 246, 990–996 (2017)                                 | 2017 | TiO2 | mTiO2 | MAPbI3               | two-step | spin-dip | ethanol       | DMF      | CuPc         | no     | 12.1 |
| Cheng, N. et al., <i>Electrochim. Acta</i> 246, 990–996 (2017)                                 | 2017 | TiO2 | mTiO2 | MAPbI3               | two-step | spin-dip | no            | DMF      | CuPc         | no     | 11.7 |
| Cheng, H. et al., <i>Journal of Energy Chemistry</i> (2017), doi:10.1016/j.jechem. 2017.08.007 | 2017 | TiO2 | 0     | MAPbI3-xClx          | two-step | spin     | no            | DMF      | TPADPP-2     | Li+TBP | 9.9  |
| Cheng, H. et al., <i>Journal of Energy Chemistry</i> (2017), doi:10.1016/j.jechem. 2017.08.007 | 2017 | TiO2 | 0     | MAPbI3-xClx          | two-step | spin     | no            | DMF      | PTZDPP-2     | Li+TBP | 8.2  |
| Cheng, H. et al., <i>Journal of Energy Chemistry</i> (2017), doi:10.1016/j.jechem. 2017.08.007 | 2017 | TiO2 | 0     | MAPbI3-xClx          | two-step | spin     | no            | DMF      | TPADPP-1     | Li+TBP | 5.1  |
| Cheng, H. et al., <i>Journal of Energy Chemistry</i> (2017), doi:10.1016/j.jechem. 2017.08.007 | 2017 | TiO2 | 0     | MAPbI3-xClx          | two-step | spin     | no            | DMF      | spiro-OMeTAD | Li+TBP | 14.9 |
| Chiang, Y.-H. et al., <i>ACS Appl. Mater. Interfaces</i> 9, 2403–2409 (2017)                   | 2017 | TiO2 | mTiO2 | FA1-xCsxPb(SCN)yI3-y | two-step | spin-dip | no            | DMF      | spiro-OMeTAD | Li+TBP | 11.4 |
| Chiang, Y.-H. et al., <i>ACS Appl. Mater. Interfaces</i> 9, 2403–2409 (2017)                   | 2017 | TiO2 | mTiO2 | FA1-xCsxPb(SCN)yI3-y | one-step | spin 2-3 | chlorobenzene | DMF+DMSO | spiro-OMeTAD | Li+TBP | 16.9 |



|                                                                       |      |                  |                   |                                                              |          |          |               |          |              |               |      |
|-----------------------------------------------------------------------|------|------------------|-------------------|--------------------------------------------------------------|----------|----------|---------------|----------|--------------|---------------|------|
| Chiang, Y.-H. et al., ACS Appl. Mater. Interfaces 9, 2403–2409 (2017) | 2017 | TiO <sub>2</sub> | mTiO <sub>2</sub> | FA1-xCsxPbI <sub>3</sub>                                     | one-step | spin 2-3 | chlorobenzene | DMF+DMSO | spiro-OMeTAD | Li+TBP        | 14   |
| Cho, A.-N. et al., J. Mater. Chem. A 5, 7603–7611 (2017)              | 2017 | TiO <sub>2</sub> | PCBM              | MAPbI <sub>3</sub>                                           | one-step | spin     | diethyl ether | DMF+DMSO | ACR-TPA      | Li+TBP        | 16.4 |
| Cho, A.-N. et al., J. Mater. Chem. A 5, 7603–7611 (2017)              | 2017 | TiO <sub>2</sub> | PCBM              | MAPbI <sub>3</sub>                                           | one-step | spin     | diethyl ether | DMF+DMSO | spiro-OMeTAD | Li+TBP        | 16.3 |
| Cimaroli, A. J. et al., J. Mater. Chem. C 5, 10152–10157 (2017)       | 2017 | C60- SAM         | 0                 | MA0.7FA0.3PbI <sub>3</sub>                                   | one-step | spin     | diethyl ether | DMF+DMSO | spiro-OMeTAD | Li+TBP        | 11.8 |
| Cohen, B.-E. et al., Adv. Funct. Mater. 27, 1604733 (2017)            | 2017 | TiO <sub>2</sub> | 0                 | MAPbBr <sub>3</sub>                                          | one-step | spin 2-3 | toluene       | DMSO+GBL | no           | no            | 6.2  |
| Cohen, B.-E. et al., Adv. Funct. Mater. 27, 1604733 (2017)            | 2017 | TiO <sub>2</sub> | 0                 | (PEA) <sub>2</sub> (MA) <sub>n</sub> -1PbnBr <sub>3n+1</sub> | one-step | spin 2-3 | toluene       | DMSO+GBL | no           | no            | 6.3  |
| Cohen, B.-E. et al., Adv. Funct. Mater. 27, 1604733 (2017)            | 2017 | TiO <sub>2</sub> | 0                 | MAPbBr <sub>3</sub>                                          | one-step | spin 2-3 | toluene       | DMSO+GBL | spiro-OMeTAD | Li+TBP+FK 209 | 8.1  |
| Cohen, B.-E. et al., Adv. Funct. Mater. 27, 1604733 (2017)            | 2017 | TiO <sub>2</sub> | 0                 | (PEA) <sub>2</sub> (MA) <sub>n</sub> -1PbnBr <sub>3n+1</sub> | one-step | spin 2-3 | toluene       | DMSO+GBL | spiro-OMeTAD | Li+TBP+FK 209 | 8.5  |
| Conings, B. et al., ACS Appl. Mater. Interfaces 9, 8092–8099 (2017)   | 2017 | TiO <sub>2</sub> | mTiO <sub>2</sub> | MAPbI <sub>3</sub>                                           | one-step | spin     | no            | DMF      | spiro-OMeTAD | Li+TBP        | 17.5 |

|                                                                               |      |      |       |                    |          |                                   |         |          |              |                  |      |
|-------------------------------------------------------------------------------|------|------|-------|--------------------|----------|-----------------------------------|---------|----------|--------------|------------------|------|
| Conings, B. et al., ACS Appl. Mater. Interfaces<br>9, 8092–<br>8099 (2017)    | 2017 | TiO2 | mTiO2 | MAPbI3             | one-step | spin                              | no      | DMF      | spiro-OMeTAD | Li+TBP           | 9.1  |
| Kosta, I. et al., Electrochim. Acta 246, 1193–<br>1199<br>(2017)              | 2017 | TiO2 | 0     | MAPbI3             | two-step | electrod<br>e<br>position-<br>dip | no      | na       | spiro-OMeTAD | Li+TBP           | 7.3  |
| Dao, Q. D. et al., Org. Electron. physics,<br>Mater. Appl. 43, 156–161 (2017) | 2017 | TiO2 | mTiO2 | MAPbI3             | one-step | spin                              | toluene | DMSO     | C5PcH2       | no               | 12.2 |
| Dar, M. I. et al., Adv. Funct. Mater. 27,<br>1701433 (2017)                   | 2017 | TiO2 | mTiO2 | MAPbI3             | two-step | spin                              | no      | DMF      | spiro-OMeTAD | Li+TBP+FK<br>209 | 15.3 |
| Dar, M. I. et al., Adv. Funct. Mater. 27,<br>1701433 (2017)                   | 2017 | TiO2 | mTiO2 | MAPbI3             | two-step | spin-dip                          | no      | DMF      | spiro-OMeTAD | Li+TBP+FK<br>209 | 14.5 |
| Dar, M. I. et al., Adv. Funct. Mater. 27,<br>1701433 (2017)                   | 2017 | TiO2 | mTiO2 | FAPbBr3            | two-step | spin-dip                          | no      | DMF      | spiro-OMeTAD | Li+TBP+FK<br>209 | 5.4  |
| Dar, M. I. et al., Adv. Funct. Mater. 27,<br>1701433 (2017)                   | 2017 | TiO2 | mTiO2 | FAPbBr3            | two-step | spin-dip                          | no      | DMF+DMSO | spiro-OMeTAD | Li+TBP+FK<br>209 | 6.8  |
| Dar, M. I. et al., Adv. Funct. Mater. 27,<br>1701433 (2017)                   | 2017 | TiO2 | mTiO2 | MAPbBr3            | one-step | spin                              | no      | DMF+HBr  | spiro-OMeTAD | Li+TBP+FK<br>209 | 1.4  |
| Deng, X. et al., J. Phys. Chem. Lett. 8, 3206–<br>3210 (2017)                 | 2017 | TiO2 | 0     | MAPbI3             | two-step | spin                              | no      | DMF+DMSO | spiro-OMeTAD | Li+TBP           | 16.3 |
| Ding, B. et al., J. Mater. Chem. A 5, 6840–<br>6848 (2017)                    | 2017 | TiO2 | 0     | FA0.1MA0.9<br>PbI3 | one-step | spin                              | no      | DMF      | spiro-OMeTAD | Li+TBP           | 20.4 |

|                                                                            |      |                  |                   |                                      |          |      |    |          |              |        |      |
|----------------------------------------------------------------------------|------|------------------|-------------------|--------------------------------------|----------|------|----|----------|--------------|--------|------|
| Dong, Q. et al., Nano Energy 38, 358–367 (2017)                            | 2017 | SnO <sub>2</sub> | 0                 | MAPbI <sub>3</sub>                   | two-step | spin | no | DMF+DMSO | spiro-OMeTAD | Li+TBP | 18.2 |
| Dong, Q. et al., Nano Energy 38, 358–367 (2017)                            | 2017 | TiO <sub>2</sub> | mTiO <sub>2</sub> | MAPbI <sub>3</sub>                   | two-step | spin | no | DMF+DMSO | spiro-OMeTAD | Li+TBP | 17.3 |
| Dong, Q. et al., Nano Energy 38, 358–367 (2017)                            | 2017 | no               | no                | MAPbI <sub>3</sub>                   | two-step | spin | no | DMF+DMSO | spiro-OMeTAD | Li+TBP | 17.3 |
| Eze, V. O. et al., Org. Electron. physics, Mater. Appl. 46, 253–262 (2017) | 2017 | WO <sub>x</sub>  | 0                 | MAPbI <sub>3</sub>                   | one-step | spin | no | GBL+NMP  | spiro-OMeTAD | Li+TBP | 13.1 |
| Eze, V. O. et al., Org. Electron. physics, Mater. Appl. 46, 253–262 (2017) | 2017 | WO <sub>x</sub>  | C60               | MAPbI <sub>3</sub>                   | one-step | spin | no | GBL+NMP  | spiro-OMeTAD | Li+TBP | 16.1 |
| Fan, R. et al., J. Mater. Chem. A 5, 12034–12042 (2017)                    | 2017 | TiO <sub>2</sub> | 0                 | MAPbI <sub>3</sub> -xCl <sub>x</sub> | two-step | spin | no | DMF      | spiro-OMeTAD | Li+TBP | 15.5 |
| Fan, R. et al., J. Mater. Chem. A 5, 12034–12042 (2017)                    | 2017 | TiO <sub>2</sub> | TiO <sub>2</sub>  | MAPbI <sub>3</sub> -xCl <sub>x</sub> | two-step | spin | no | DMF      | spiro-OMeTAD | Li+TBP | 16.8 |
| Fan, R. et al., J. Mater. Chem. A 5, 12034–12042 (2017)                    | 2017 | TiO <sub>2</sub> | 0                 | FAI,MAI,MA<br>Cl,MABr,PbI<br>2       | two-step | spin | no | DMF      | spiro-OMeTAD | Li+TBP | 18.2 |
| Fan, R. et al., J. Mater. Chem. A 5, 12034–12042 (2017)                    | 2017 | TiO <sub>2</sub> | TiO <sub>2</sub>  | FAI,MAI,MA<br>Cl,MABr,PbI<br>2       | two-step | spin | no | DMF      | spiro-OMeTAD | Li+TBP | 20.1 |
| Fei, C. et al., Adv. Energy Mater. 7, 1602017 (2017)                       | 2017 | TiO <sub>2</sub> | mTiO <sub>2</sub> | MAPbI <sub>3</sub>                   | one-step | spin | no | DMF      | spiro-OMeTAD | Li+TBP | 14.8 |

|                                                                    |      |      |       |                |          |          |               |              |              |        |      |
|--------------------------------------------------------------------|------|------|-------|----------------|----------|----------|---------------|--------------|--------------|--------|------|
| Fei, C. et al., Adv. Energy Mater. 7, 1602017 (2017)               | 2017 | TiO2 | mTiO2 | MAPbI3         | one-step | spin     | ethylacetate  | DMF+thiourea | spiro-OMeTAD | Li+TBP | 18.5 |
| Fei, C. et al., Adv. Energy Mater. 7, 1602017 (2017)               | 2017 | TiO2 | mTiO2 | MAPbI3         | one-step | spin     | no            | DMF+thiourea | spiro-OMeTAD | Li+TBP | 13.4 |
| Gaml, E. A. et al., Sol. Energy Mater. Sol. Cells 168, 8–13 (2017) | 2017 | TiO2 | mTiO2 | MAPbI3         | two-step | spin-dip | no            | DMF          | spiro-OMeTAD | Li+TBP | 11.6 |
| Gaml, E. A. et al., Sol. Energy Mater. Sol. Cells 168, 8–13 (2017) | 2017 | TiO2 | mTiO2 | MAPbI3         | two-step | spin-dip | no            | DMF          | PBDTT-FTTE   | DIO    | 11.6 |
| Gao, X. et al., Phys. Chem. Chem. Phys. 19, 4956–4961 (2017)       | 2017 | TiO2 | mTiO2 | MAPbI3         | two-step | spin     | no            | DMF          | spiro-OMeTAD | Li+TBP | 10.9 |
| Gao, X. et al., Phys. Chem. Chem. Phys. 19, 4956–4961 (2017)       | 2017 | TiO2 | TiO2  | MAPbI3         | two-step | spin     | no            | DMF          | spiro-OMeTAD | Li+TBP | 13.8 |
| Gao, L.-L. et al., J.                                              | 2017 | TiO2 | 0     | MAPbI3         | one-step | spin-MAK | no            | DMF          | spiro-OMeTAD | Li+TBP | 17.7 |
| Gao, C. et al., Chem. Eng. J. 325, 378–385 (2017)                  | 2017 | ZnO  | SnO2  | MAPbI3         | one-step | spin     | chlorobenzene | DMF          | P3HT         | no     | 12.3 |
| Grancini, G. et al., Nat. Commun. 8, 15684 (2017)                  | 2017 | TiO2 | mTiO2 | MAPbI3         | one-step | spin 2-3 | chlorobenzene | DMSO         | spiro-OMeTAD | no     | 16   |
| Grancini, G. et al., Nat. Commun. 8, 15684 (2017)                  | 2017 | TiO2 | mTiO2 | 3% AVAI-MAPbI3 | one-step | spin 2-3 | chlorobenzene | DMSO         | spiro-OMeTAD | no     | 14.6 |

|                                                          |      |                                   |                   |                                                                                     |          |          |                           |          |                          |               |      |
|----------------------------------------------------------|------|-----------------------------------|-------------------|-------------------------------------------------------------------------------------|----------|----------|---------------------------|----------|--------------------------|---------------|------|
| Grisorio, R. et al. ACS Energy Lett. 2, 1029–1034 (2017) | 2017 | TiO <sub>2</sub>                  | mTiO <sub>2</sub> | CsI, MAI, MABr, Pbl <sub>2</sub> , PbBr <sub>2</sub>                                | one-step | spin 2-3 | chlorobenzene             | DMF+DMSO | PTZ2                     | Li+TBP+FK 209 | 17.6 |
| Grisorio, R. et al. ACS Energy Lett. 2, 1029–1034 (2017) | 2017 | TiO <sub>2</sub>                  | mTiO <sub>2</sub> | CsI, MAI, MABr, Pbl <sub>2</sub> , PbBr <sub>2</sub>                                | one-step | spin 2-3 | chlorobenzene             | DMF+DMSO | PTZ1                     | Li+TBP+FK 209 | 2.1  |
| Grisorio, R. et al. ACS Energy Lett. 2, 1029–1034 (2017) | 2017 | TiO <sub>2</sub>                  | mTiO <sub>2</sub> | CsI, MAI, MABr, Pbl <sub>2</sub> , PbBr <sub>2</sub>                                | one-step | spin 2-3 | chlorobenzene             | DMF+DMSO | spiro-OMeTAD             | Li+TBP+FK 209 | 17.7 |
| Guo, Y. et al., Nano Energy 38, 193–200 (2017)           | 2017 | Ni-Fe <sub>2</sub> O <sub>3</sub> | 0                 | MAPbI <sub>3</sub>                                                                  | one-step | spin     | chlorobenzene             | DMF      | spiro-OMeTAD             | Li+TBP        | 14.1 |
| Guo, Y. et al., Nano Energy 38, 193–200 (2017)           | 2017 | Fe <sub>2</sub> O <sub>3</sub>    | 0                 | MAPbI <sub>3</sub>                                                                  | one-step | spin     | chlorobenzene             | DMF      | spiro-OMeTAD             | Li+TBP        | 12.3 |
| Guo, J. J. et al., Sol. Energy 155, 121–129 (2017)       | 2017 | TiO <sub>2</sub>                  | mTiO <sub>2</sub> | (FAPbI <sub>3</sub> ) <sub>0.8</sub><br>5<br>(MAPbBr <sub>3</sub> ) <sub>0.15</sub> | one-step | spin 2-3 | chlorobenzene<br>+toluene | DMF+DMSO | no                       | no            | 7.8  |
| Guo, J. J. et al., Sol. Energy 155, 121–129 (2017)       | 2017 | TiO <sub>2</sub>                  | mTiO <sub>2</sub> | (FAPbI <sub>3</sub> ) <sub>0.8</sub><br>5<br>(MAPbBr <sub>3</sub> ) <sub>0.15</sub> | one-step | spin 2-3 | chlorobenzene<br>+toluene | DMF+DMSO | ZnPcNO <sub>2</sub> -Oph | no            | 14.5 |
| Guo, J. J. et al., Sol. Energy 155, 121–129 (2017)       | 2017 | TiO <sub>2</sub>                  | mTiO <sub>2</sub> | (FAPbI <sub>3</sub> ) <sub>0.8</sub><br>5<br>(MAPbBr <sub>3</sub> ) <sub>0.15</sub> | one-step | spin 2-3 | chlorobenzene<br>+toluene | DMF+DMSO | CuPcNO <sub>2</sub> -Oph | no            | 12.8 |

|                                                                    |      |      |        |                                       |          |          |                           |          |                        |        |      |
|--------------------------------------------------------------------|------|------|--------|---------------------------------------|----------|----------|---------------------------|----------|------------------------|--------|------|
| Guo, J. J. et al., Sol. Energy 155, 121–129 (2017)                 | 2017 | TiO2 | mTiO2  | (FAPbI3)0.8<br>5<br>(MAPbBr3)0.<br>15 | one-step | spin 2-3 | chlorobenzene<br>+toluene | DMF+DMSO | spiro-OMeTAD           | Li+TBP | 18.9 |
| Ha, S.-J. et al., J. Mater. Chem. A 5, 1972–1977 (2017)            | 2017 | PS   | mTiO2  | MAPbI3                                | one-step | spin     | toluene                   | DMSO     | PTAA                   | Li+TBP | 17.1 |
| Habisreutinger, S. N. et al., Adv. Energy Mater. 7, 1601079 (2017) | 2017 | 0    | mAl2O3 | MAPbI3-xClx                           | one-step | spin     | no                        | DMF+H3P  | SWNT-PMMA              | no     | 6.5  |
| Habisreutinger, S. N. et al., Adv. Energy Mater. 7, 1601079 (2017) | 2017 | TiO2 | mAl2O3 | MAPbI3-xClx                           | one-step | spin     | no                        | DMF+H3P  | SWNT-PMMA              | no     | 16.2 |
| Habisreutinger, S. N. et al., Adv. Energy Mater. 7, 1601079 (2017) | 2017 | TiO2 | mAl2O3 | MAPbI3-xClx                           | one-step | spin     | no                        | DMF+H3P  | SWNT-<br>polycarbonate | no     | 12.6 |
| Habisreutinger, S. N. et al., Adv. Energy Mater. 7, 1601079 (2017) | 2017 | TiO2 | mAl2O3 | MAPbI3-xClx                           | one-step | spin     | no                        | DMF+H3P  | SWNT-PMMA              | TBP    | 17.3 |
| Habisreutinger, S. N. et al., Adv. Energy Mater. 7, 1601079 (2017) | 2017 | TiO2 | mAl2O3 | MAPbI3-xClx                           | one-step | spin     | no                        | DMF+H3P  | SWNT-<br>polycarbonate | TBP    | 14   |
| Han, F. et al., J. Power Sources 359, 577–584 (2017)               | 2017 | TiO2 | mTiO2  | MAPbI3                                | one-step | spin     | chlorobenzene             | DMF      | spiro-OMeTAD           | Li+TBP | 14.1 |
| Han, F. et al., J. Power Sources 359, 577–584 (2017)               | 2017 | TiO2 | mTiO2  | MAPbI3                                | one-step | spin     | chlorobenzene             | DMF+4MSA | spiro-OMeTAD           | Li+TBP | 17.6 |

|                                                                  |      |           |       |                                        |          |          |                        |      |              |                  |      |
|------------------------------------------------------------------|------|-----------|-------|----------------------------------------|----------|----------|------------------------|------|--------------|------------------|------|
| Han, F. et al., <i>Electrochim. Acta</i> 236, 122–130 (2017)     | 2017 | TiO2      | mTiO2 | MAPbI3                                 | one-step | spin     | chlorobenzene          | DMF  | spiro-OMeTAD | Li+TBP+FK<br>209 | 17.1 |
| Han, F. et al., <i>Electrochim. Acta</i> 236, 122–130 (2017)     | 2017 | TiO2      | mTiO2 | MAPbI3                                 | one-step | spin     | chlorobenzene          | DMF  | spiro-OMeTAD | Li+TBP+FK<br>209 | 14.4 |
| Han, F. et al., <i>Appl. Surf. Sci.</i> 408, 34–37 (2017)        | 2017 | TiO2      | mTiO2 | MAPbI3                                 | one-step | spin     | chlorobenzene          | na   | spiro-OMeTAD | Li+TBP           | 13.8 |
| Han, F. et al., <i>Appl. Surf. Sci.</i> 408, 34–37 (2017)        | 2017 | TiO2      | mTiO2 | MAPbI3                                 | one-step | spin     | chlorobenzene<br>+DMSO | na   | spiro-OMeTAD | Li+TBP           | 16.8 |
| Hatamvand, M. et al., <i>Optik (Stuttg.)</i> 140, 443–450 (2017) | 2017 | ZnO       | 0     | MAPbI3                                 | two-step | spin-dip | no                     | DMF  | no           | no               | 0.3  |
| He, M. et al., <i>Nat. Commun.</i> 8, 16045 (2017)               | 2017 | TiO2      | no    | FA0.85MA0.15PbI2.55Br0.45              | one-step | MASP     | no                     | DMSO | PTAA         | Li+TBP           | 20.4 |
| He, M. et al., <i>Nat. Commun.</i> 8, 16045 (2017)               | 2017 | TiO2      | no    | FA0.85MA0.15PbI2.55Br0.45              | one-step | spin 2-3 | no                     | DMSO | PTAA         | Li+TBP           | 18.3 |
| Hou, Y. et al., <i>Adv. Funct. Mater.</i> 27, 1700878 (2017)     | 2017 | TiO2      | 0     | MAPbI3                                 | two-step | spin-dip | no                     | DMF  | spiro-OMeTAD | Li+TBP           | 12   |
| Hou, Y. et al., <i>Adv. Funct. Mater.</i> 27, 1700878 (2017)     | 2017 | TiO2-SnO2 | 0     | MAPbI3                                 | two-step | spin-dip | no                     | DMF  | spiro-OMeTAD | Li+TBP           | 16.5 |
| Hou, Y. et al., <i>Adv. Funct. Mater.</i> 27, 1700878 (2017)     | 2017 | TiO2-SnO2 | 0     | Cs5(MA0.17FA0.83)95PbI3 (I0.83Br0.17)3 | two-step | spin-dip | no                     | DMF  | spiro-OMeTAD | Li+TBP           | 18.1 |

|                                                                           |      |                                          |                   |                    |          |          |               |          |              |        |      |
|---------------------------------------------------------------------------|------|------------------------------------------|-------------------|--------------------|----------|----------|---------------|----------|--------------|--------|------|
| Hou, X. et al., <i>Electrochim. Acta</i> 236, 351–358 (2017)              | 2017 | TiO <sub>2</sub>                         | 0                 | MAPbI <sub>3</sub> | one-step | spin     | no            | DMF+DMSO | spiro-OMeTAD | Li+TBP | 6.1  |
| Hou, X. et al., <i>Electrochim. Acta</i> 236, 351–358 (2017)              | 2017 | TiO <sub>2</sub>                         | mTiO <sub>2</sub> | MAPbI <sub>3</sub> | one-step | spin     | no            | DMF+DMSO | spiro-OMeTAD | Li+TBP | 11.3 |
| Hou, X. et al., <i>Electrochim. Acta</i> 236, 351–358 (2017)              | 2017 | TiO <sub>2</sub>                         | 0                 | MAPbI <sub>3</sub> | two-step | spin     | no            | DMF+DMSO | spiro-OMeTAD | Li+TBP | 7    |
| Hou, X. et al., <i>Electrochim. Acta</i> 236, 351–358 (2017)              | 2017 | TiO <sub>2</sub>                         | mTiO <sub>2</sub> | MAPbI <sub>3</sub> | two-step | spin     | no            | DMF+DMSO | spiro-OMeTAD | Li+TBP | 12   |
| Hu, W. et al., <i>J. Mater. Chem. A</i> 5, 1434–1441 (2017)               | 2017 | TiO <sub>2</sub>                         | 0                 | MAPbI <sub>3</sub> | two-step | spin-dip | no            | DMF      | spiro-OMeTAD | Li+TBP | 15.7 |
| Hu, W. et al., <i>J. Mater. Chem. A</i> 5, 1434–1441 (2017)               | 2017 | In <sub>2</sub> S <sub>3</sub>           | 0                 | MAPbI <sub>3</sub> | two-step | spin-dip | no            | DMF      | spiro-OMeTAD | Li+TBP | 18.2 |
| Hu, W. et al., <i>J. Mater. Chem. A</i> 5, 1434–1441 (2017)               | 2017 | TiO <sub>2</sub>                         | 0                 | MAPbI <sub>3</sub> | one-step | spin     | chlorobenzene | DMF      | spiro-OMeTAD | Li+TBP | 15.3 |
| Hu, W. et al., <i>J. Mater. Chem. A</i> 5, 1434–1441 (2017)               | 2017 | $\alpha$ -Fe <sub>2</sub> O <sub>3</sub> | 0                 | MAPbI <sub>3</sub> | one-step | spin     | chlorobenzene | DMF      | spiro-OMeTAD | Li+TBP | 14.2 |
| Huang, Z.-L. et al., <i>Superlattices Microstruct.</i> 102, 94–102 (2017) | 2017 | ZnO                                      | Al-ZnO-nanorod    | MAPbI <sub>3</sub> | two-step | spin     | no            | DMF      | P3HT         | Li     | 10.5 |
| Huang, Z.-L. et al., <i>Superlattices Microstruct.</i> 102, 94–102 (2017) | 2017 | ZnO                                      | ZnO-nanorod       | MAPbI <sub>3</sub> | two-step | spin     | no            | DMF      | P3HT         | Li     | 8    |
| Huang, Y. T. et al., <i>Electrochim. Acta</i> 236, 131–139 (2017)         | 2017 | 0                                        | mTiO <sub>2</sub> | MAPbI <sub>3</sub> | two-step | spin-dip | no            | DMF+DMSO | spiro-OMeTAD | Li+TBP | 7.4  |



|                                                            |      |       |       |                                   |          |          |               |          |              |                  |      |
|------------------------------------------------------------|------|-------|-------|-----------------------------------|----------|----------|---------------|----------|--------------|------------------|------|
| Huang, Y. T. et al., Electrochim. Acta 236, 131–139 (2017) | 2017 | TiO2  | mTiO2 | MAPbI3                            | two-step | spin-dip | no            | DMF+DMSO | spiro-OMeTAD | Li+TBP           | 13   |
| Huang, Y. T. et al., Electrochim. Acta 236, 131–139 (2017) | 2017 | Nb2O5 | mTiO2 | MAPbI3                            | two-step | spin-dip | no            | DMF+DMSO | spiro-OMeTAD | Li+TBP           | 14.6 |
| Huckaba, A. J. et al., Small Methods 1, 1700250 (2017)     | 2017 | TiO2  | mTiO2 | (FAPbI3)0.8<br>5<br>(MAPbBr3)0.15 | one-step | spin 2-3 | chlorobenzene | DMF+DMSO | no           | no               | 8.4  |
| Huckaba, A. J. et al., Small Methods 1, 1700250 (2017)     | 2017 | TiO2  | mTiO2 | (FAPbI3)0.8<br>5<br>(MAPbBr3)0.15 | one-step | spin 2-3 | chlorobenzene | DMF+DMSO | TiS2         | no               | 13.2 |
| Huckaba, A. J. et al., Small Methods 1, 1700250 (2017)     | 2017 | TiO2  | mTiO2 | (FAPbI3)0.8<br>5<br>(MAPbBr3)0.15 | one-step | spin 2-3 | chlorobenzene | DMF+DMSO | spiro-OMeTAD | Li+TBP+FK<br>209 | 18.1 |
| Islavath, N. et al., J. Energy Chem. 26, 584–591 (2017)    | 2017 | TiO2  | mTiO2 | MAPbI3                            | two-step | spin     | no            | DMF      | no           | no               | 1.6  |
| Islavath, N. et al., J. Energy Chem. 26, 584–591 (2017)    | 2017 | TiO2  | mTiO2 | MAPbI3                            | two-step | spin     | no            | DMF      | CuSCN        | no               | 7.2  |
| Islavath, N. et al., J. Energy Chem. 26, 584–591 (2017)    | 2017 | TiO2  | mTiO2 | MAPbI3                            | two-step | spin     | no            | DMF      | spiro-OMeTAD | Li+TBP           | 5    |
| Jiang, X. et al., Sci. Rep. 7, 42564 (2017)                | 2017 | TiO2  | mTiO2 | (FAPbI3)0.8<br>5(MAPbBr3)<br>0.15 | one-step | spin 2-3 | chlorobenzene | DMF+DMSO | no           | no               | 8.5  |

|                                                                      |      |                  |                   |                                                                                |          |          |               |          |              |                  |      |
|----------------------------------------------------------------------|------|------------------|-------------------|--------------------------------------------------------------------------------|----------|----------|---------------|----------|--------------|------------------|------|
| Jiang, X. et al., Sci. Rep. 7, 42564 (2017)                          | 2017 | TiO <sub>2</sub> | mTiO <sub>2</sub> | (FAPbI <sub>3</sub> ) <sub>0.8</sub><br>5(MAPbBr <sub>3</sub> )<br>0.15        | one-step | spin 2-3 | chlorobenzene | DMF+DMSO | PEDOT        | no               | 17   |
| Jiang, X. et al., Sci. Rep. 7, 42564 (2017)                          | 2017 | TiO <sub>2</sub> | mTiO <sub>2</sub> | (FAPbI <sub>3</sub> ) <sub>0.8</sub><br>5(MAPbBr <sub>3</sub> )<br>0.15        | one-step | spin 2-3 | chlorobenzene | DMF+DMSO | spiro-OMeTAD | Li+TBP           | 18.6 |
| Jiang, X. et al., Sci. Rep. 7, 42564 (2017)                          | 2017 | TiO <sub>2</sub> | mTiO <sub>2</sub> | (FAPbI <sub>3</sub> ) <sub>0.8</sub><br>5(MAPbBr <sub>3</sub> )<br>0.15        | one-step | spin 2-3 | chlorobenzene | DMF+DMSO | spiro-OMeTAD | Li+TBP           | 15.2 |
| Jiang, J. et al., J. Mater. Chem. A 5, 9514–9522 (2017)              | 2017 | TiO <sub>2</sub> | 0                 | MAPbI <sub>3</sub>                                                             | one-step | spin     | no            | DMSO+GBL | spiro-OMeTAD | Li+TBP           | 17.1 |
| Jiang, J. et al., J. Mater. Chem. A 5, 9514–9522 (2017)              | 2017 | ITIC             | 0                 | MAPbI <sub>3</sub>                                                             | one-step | spin     | no            | DMSO+GBL | spiro-OMeTAD | Li+TBP           | 11.5 |
| Jiang, J. et al., J. Mater. Chem. A 5, 9514–9522 (2017)              | 2017 | TiO <sub>2</sub> | ITIC              | MAPbI <sub>3</sub>                                                             | one-step | spin     | no            | DMSO+GBL | spiro-OMeTAD | Li+TBP           | 20.1 |
| Jin, J. et al., ACS Appl. Mater. Interfaces 9, acsami.7b15310 (2017) | 2017 | TiO <sub>2</sub> | no                | MAPbI <sub>3</sub>                                                             | one-step | spin 2-3 | chlorobenzene | DMSO     | spiro-OMeTAD | Li+TBP           | 16.4 |
| Jin, J. et al., ACS Appl. Mater. Interfaces 9, acsami.7b15310 (2017) | 2017 | TiO <sub>2</sub> | no                | MAI(PbI <sub>2</sub> ) <sub>0.9</sub><br>7(ZnCl <sub>2</sub> ) <sub>0.03</sub> | one-step | spin 2-3 | chlorobenzene | DMSO     | spiro-OMeTAD | Li+TBP           | 18.2 |
| Jodlowski, A. D. et al., Nat. Energy 2, 972–979 (2017)               | 2017 | TiO <sub>2</sub> | mTiO <sub>2</sub> | MAPbI <sub>3</sub>                                                             | one-step | spin 2-3 | chlorobenzene | DMSO     | spiro-OMeTAD | Li+TBP+FK<br>209 | 18.9 |
| Jodlowski, A. D. et al., Nat. Energy 2, 972–979 (2017)               | 2017 | TiO <sub>2</sub> | mTiO <sub>2</sub> | MA1 每<br>x GuaxPbI <sub>3</sub>                                                | one-step | spin 2-3 | chlorobenzene | DMSO     | spiro-OMeTAD | Li+TBP+FK<br>209 | 20.2 |

|                                                             |      |      |       |                                         |          |                               |               |          |              |                  |      |
|-------------------------------------------------------------|------|------|-------|-----------------------------------------|----------|-------------------------------|---------------|----------|--------------|------------------|------|
| Jung, K.-H. et al., J. Mater. Chem. A 5, 24790–24803 (2017) | 2017 | SnO2 | 0     | (FAPbI3)0.8<br>7<br>5(CsPbBr3)0<br>.125 | one-step | spin                          | no            | DMF      | spiro-OMeTAD | Li+TBP           | 18.3 |
| Kavadiya, S. et al., Adv. Energy Mater. 7, 1700210 (2017)   | 2017 | TiO2 | mTiO2 | MAPbI3                                  | two-step | spin-<br>electros<br>pr<br>ay | no            | DMF      | spiro-OMeTAD | Li+TBP           | 12   |
| Kavadiya, S. et al., Adv. Energy Mater. 7, 1700210 (2017)   | 2017 | TiO2 | mTiO2 | MAPbI3                                  | two-step | spin                          | no            | DMF      | spiro-OMeTAD | Li+TBP           | 6.3  |
| Ke, W. et al., Sci. Adv. 3, e1701293 (2017)                 | 2017 | TiO2 | mTiO2 | en-FASnI3                               | one-step | spin                          | no            | DMF+DMSO | PTAA         | no               | 7.1  |
| Kırbıyık, Ç. et al., Appl. Surf. Sci. 423, 521–527 (2017)   | 2017 | TiO2 | 0     | MAPbI3                                  | one-step | spin                          | toluene       | GBL      | P3HT         | no               | 7.5  |
| Kırbıyık, Ç. et al., Appl. Surf. Sci. 423, 521–527 (2017)   | 2017 | TiO2 | SAM   | MAPbI3                                  | one-step | spin                          | toluene       | GBL      | P3HT         | no               | 11.3 |
| Kim, D. H. et al., Adv. Mater. 29, 1606831 (2017)           | 2017 | TiO2 | 0     | FA0.6MA0.4<br>PbI(3-y)Cl <sub>y</sub>   | one-step | spin 2-3                      | diethyl ether | DMF      | spiro-OMeTAD | Li+TBP+FK<br>102 | 19.7 |
| Kim, D. H. et al., Adv. Mater. 29, 1606831 (2017)           | 2017 | TiO2 | 0     | FA0.6MA0.4<br>PbI(3-y)Cl <sub>y</sub>   | one-step | spin 2-3                      | diethyl ether | DMSO+GBL | spiro-OMeTAD | Li+TBP+FK<br>102 | 15.7 |
| Kim, C. W. et al., Sci. Rep. 7, 6849 (2017)                 | 2017 | TiO2 | mTiO2 | MAPbI3                                  | two-step | spin-dip                      | no            | DMF      | spiro-OMeTAD | Li+TBP+FK<br>209 | 15.2 |
| Kim, N.-K. et al., Sci. Rep. 7, 4645 (2017)                 | 2017 | TiO2 | mTiO2 | MAPbI3                                  | one-step | spin                          | diethyl ether | DMF+DMSO | spiro-OMeTAD | Li+TBP           | 15.5 |

|                                                                |      |            |       |                                   |          |          |               |          |              |        |      |
|----------------------------------------------------------------|------|------------|-------|-----------------------------------|----------|----------|---------------|----------|--------------|--------|------|
| Kim, W. et al., <i>Electrochim. Acta</i> 245, 734–741 (2017)   | 2017 | TiO2       | mTiO2 | MAPbI3-xClx                       | one-step | spin     | no            | DMF      | spiro-OMeTAD | Li+TBP | 10.8 |
| Kim, W. et al., <i>Electrochim. Acta</i> 245, 734–741 (2017)   | 2017 | TiO2       | mTiO2 | MAPbI3-xClx                       | two-step | dip-spin | no            | DMF      | spiro-OMeTAD | Li+TBP | 12.1 |
| Lee, W. et al., <i>Org. Electron.</i> 51, 404–409 (2017)       | 2017 | 0          | PCBM  | MAPbI3                            | one-step | spin     | chlorobenzene | DMF+DMSO | spiro-OMeTAD | Li+TBP | 12.6 |
| Lee, W. et al., <i>Org. Electron.</i> 51, 404–409 (2017)       | 2017 | PEIE-LiQ   | PCBM  | MAPbI3                            | one-step | spin     | chlorobenzene | DMF+DMSO | spiro-OMeTAD | Li+TBP | 15.2 |
| Lee, Y. et al., <i>J. Mater. Chem. A</i> 5, 12729–12734 (2017) | 2017 | SnO2       | 0     | (FAPbI3)0.8<br>5<br>(MAPbBr3)0.15 | one-step | spin 2-3 | chlorobenzene | DMF+DMSO | PTAA         | Li+TBP | 13   |
| Lee, Y. et al., <i>J. Mater. Chem. A</i> 5, 12729–12734 (2017) | 2017 | TiO2       | 0     | (FAPbI3)0.8<br>5<br>(MAPbBr3)0.15 | one-step | spin 2-3 | chlorobenzene | DMF+DMSO | PTAA         | Li+TBP | 17.7 |
| Lee, Y. et al., <i>J. Mater. Chem. A</i> 5, 12729–12734 (2017) | 2017 | TiO2-SnO2  | 0     | (FAPbI3)0.8<br>5<br>(MAPbBr3)0.15 | one-step | spin 2-3 | chlorobenzene | DMF+DMSO | PTAA         | Li+TBP | 19.8 |
| Li, D. et al., <i>Chem. Sci.</i> 8, 4587–4594 (2017)           | 2017 | PFN- 2TNDI | 0     | MAPbI3-xClx                       | two-step | spin     | no            | DMF      | spiro-OMeTAD | Li+TBP | 17.2 |
| Li, D. et al., <i>Chem. Sci.</i> 8, 4587–4594 (2017)           | 2017 | PFN- 2TNDI | 0     | MAPbI3-xClx                       | two-step | spin     | no            | DMF      | spiro-OMeTAD | Li+TBP | 16   |

|                                                                      |      |                  |                   |                                    |          |                |    |     |              |                |      |
|----------------------------------------------------------------------|------|------------------|-------------------|------------------------------------|----------|----------------|----|-----|--------------|----------------|------|
| Li, D. et al., Chem. Sci. 8, 4587–4594<br>(2017)                     | 2017 | no               | no                | MAPbI <sub>3</sub> -xClx           | two-step | spin           | no | DMF | spiro-OMeTAD | Li+TBP         | 12   |
| Li, H. et al., RSC Adv. 7, 30422–30427<br>(2017)                     | 2017 | TiO <sub>2</sub> | 0                 | FA0.9Cs0.1<br>P<br>bI <sub>3</sub> | two-step | spin-<br>spray | no | DMF | spiro-OMeTAD | Li+TBP         | 8.7  |
| Li, H. et al., RSC Adv. 7, 30422–30427<br>(2017)                     | 2017 | TiO <sub>2</sub> | PCBM              | FA0.9Cs0.1<br>P<br>bI <sub>3</sub> | two-step | spin-<br>spray | no | DMF | spiro-OMeTAD | Li+TBP         | 16.8 |
| Li, B. et al., J. Power Sources 360, 11–20<br>(2017)                 | 2017 | TiO <sub>2</sub> | mTiO <sub>2</sub> | CsPbBr <sub>3</sub> -Cl            | two-step | spin-dip       | no | DMF | spiro-OMeTAD | Li+TBP         | 6.2  |
| Li, B. et al., J. Power Sources 360, 11–20<br>(2017)                 | 2017 | TiO <sub>2</sub> | mTiO <sub>2</sub> | CsPbBr <sub>3</sub>                | two-step | spin-dip       | no | DMF | spiro-OMeTAD | Li+TBP         | 5    |
| Li, H. et al., Sol. Energy Mater. Sol. Cells 168,<br>85–90<br>(2017) | 2017 | TiO <sub>2</sub> | mTiO <sub>2</sub> | MAPbI <sub>3</sub>                 | two-step | spin-<br>spray | no | DMF | spiro-OMeTAD | Li+TBP         | 13.3 |
| Li, H. et al., Sol. Energy Mater. Sol. Cells 168,<br>85–90<br>(2017) | 2017 | TiO <sub>2</sub> | mTiO <sub>2</sub> | MAPbI <sub>3</sub>                 | two-step | spin-<br>spray | no | DMF | spiro-OMeTAD | Li+TBP         | 15.5 |
| Liu, Q. et al., ChemSusChem 10,<br>3098–3104 (2017)                  | 2017 | TiO <sub>2</sub> | mTiO <sub>2</sub> | MAPbI <sub>3</sub>                 | one-step | spin           | no | DMF | spiro-OMeTAD | Li+TBP         | 14.4 |
| Liu, Q. et al., ChemSusChem 10,<br>3098–3104 (2017)                  | 2017 | TiO <sub>2</sub> | mTiO <sub>2</sub> | MAPbI <sub>3</sub>                 | one-step | spin           | no | DMF | spiro-OMeTAD | Li+TBP+BP<br>O | 17.5 |
| Liu, D. et al., RSC Adv. 7, 8295–8302<br>(2017)                      | 2017 | TiO <sub>2</sub> | mTiO <sub>2</sub> | MAPbI <sub>3</sub> -xClx           | one-step | spin           | no | DMF | spiro-OMeTAD | Li+TBP         | 15.4 |

|                                                        |      |                                  |                   |                                                                                     |          |          |               |          |                  |        |      |
|--------------------------------------------------------|------|----------------------------------|-------------------|-------------------------------------------------------------------------------------|----------|----------|---------------|----------|------------------|--------|------|
| Liu, D. et al., RSC Adv. 7, 8295–8302 (2017)           | 2017 | Cd <sub>2</sub> SnO <sub>4</sub> | mTiO <sub>2</sub> | MAPbI <sub>3</sub> -xCl <sub>x</sub>                                                | one-step | spin     | no            | DMF      | spiro-OMeTAD     | Li+TBP | 18.8 |
| Liu, C. et al., J. Phys. Chem. C 121, 6546–6553 (2017) | 2017 | TiO <sub>2</sub>                 | mTiO <sub>2</sub> | MAPbI <sub>3</sub>                                                                  | two-step | spin     | no            | DMF      | spiro-OMeTAD     | Li+TBP | 6    |
| Liu, C. et al., J. Phys. Chem. C 121, 6546–6553 (2017) | 2017 | TiO <sub>2</sub>                 | mTiO <sub>2</sub> | MAPbI <sub>3</sub>                                                                  | two-step | spin     | no            | DMF+TBP  | spiro-OMeTAD     | Li+TBP | 12.6 |
| Liu, Y. et al., RSC Adv. 7, 1206–1214 (2017)           | 2017 | TiO <sub>2</sub>                 | 0                 | MAPbI <sub>3</sub>                                                                  | one-step | spin 2-3 | toluene       | DMSO+GBL | spiro-OMeTAD     | Li+TBP | 8.3  |
| Liu, Y. et al., RSC Adv. 7, 1206–1214 (2017)           | 2017 | TiO <sub>2</sub>                 | 0                 | MAPbI <sub>3</sub>                                                                  | one-step | spin 2-3 | toluene       | DMSO+GBL | spiro-OMeTAD     | Li+TBP | 9.1  |
| Liu, Z. et al., J. Mater. Chem. A 5, 6597–6605 (2017)  | 2017 | TiO <sub>2</sub>                 | mTiO <sub>2</sub> | MAPbI <sub>3</sub>                                                                  | one-step | spin     | diethyl ether | DMF+DMSO | no               | no     | 1.8  |
| Liu, Z. et al., J. Mater. Chem. A 5, 6597–6605 (2017)  | 2017 | TiO <sub>2</sub>                 | mTiO <sub>2</sub> | MAPbI <sub>3</sub>                                                                  | one-step | spin     | diethyl ether | DMF+DMSO | NiO <sub>x</sub> | no     | 16.7 |
| Liu, X. et al., ChemSusChem 10, 968–975 (2017)         | 2017 | TiO <sub>2</sub>                 | mTiO <sub>2</sub> | MAPbI <sub>3</sub>                                                                  | one-step | spin 2-3 | chlorobenzene | DMF+DMSO | TPA-TPM          | Li+TBP | 15.1 |
| Liu, X. et al., ChemSusChem 10, 968–975 (2017)         | 2017 | TiO <sub>2</sub>                 | mTiO <sub>2</sub> | MAPbI <sub>3</sub>                                                                  | one-step | spin 2-3 | chlorobenzene | DMF+DMSO | DPA-TPM          | Li+TBP | 9.3  |
| Liu, X. et al., ChemSusChem 10, 968–975 (2017)         | 2017 | TiO <sub>2</sub>                 | mTiO <sub>2</sub> | MAPbI <sub>3</sub>                                                                  | one-step | spin 2-3 | chlorobenzene | DMF+DMSO | Ph-TPM           | Li+TBP | 4.6  |
| Liu, X. et al., ChemSusChem 10, 968–975 (2017)         | 2017 | TiO <sub>2</sub>                 | mTiO <sub>2</sub> | (FAPbI <sub>3</sub> ) <sub>0.8</sub><br>5<br>(MAPbBr <sub>3</sub> ) <sub>0.15</sub> | one-step | spin 2-3 | chlorobenzene | DMF+DMSO | TPA-TPM          | Li+TBP | 16.8 |

|                                                       |      |                                          |                   |                                                                                     |          |          |               |                  |              |        |      |
|-------------------------------------------------------|------|------------------------------------------|-------------------|-------------------------------------------------------------------------------------|----------|----------|---------------|------------------|--------------|--------|------|
| Liu, X. et al., ChemSusChem 10, 968–975 (2017)        | 2017 | TiO <sub>2</sub>                         | mTiO <sub>2</sub> | MAPbI <sub>3</sub>                                                                  | one-step | spin 2-3 | chlorobenzene | DMF+DMSO         | spiro-OMeTAD | Li+TBP | 15.5 |
| Liu, X. et al., ChemSusChem 10, 968–975 (2017)        | 2017 | TiO <sub>2</sub>                         | mTiO <sub>2</sub> | (FAPbI <sub>3</sub> ) <sub>0.8</sub><br>5<br>(MAPbBr <sub>3</sub> ) <sub>0.15</sub> | one-step | spin 2-3 | chlorobenzene | DMF+DMSO         | spiro-OMeTAD | Li+TBP | 17.4 |
| Long, M. et al., Adv. Energy Mater. 7, 1601882 (2017) | 2017 | TiO <sub>2</sub>                         | 0                 | FAPbI <sub>3</sub> -xBrx                                                            | one-step | spin     | no            | DMF              | spiro-OMeTAD | Li+TBP | 19.2 |
| Long, M. et al., Adv. Energy Mater. 7, 1601882 (2017) | 2017 | TiO <sub>2</sub>                         | 0                 | FAPbI <sub>3</sub>                                                                  | one-step | spin     | no            | DMF              | spiro-OMeTAD | Li+TBP | 15.2 |
| Lu, J. et al., Adv. Energy Mater. 7, 1700444 (2017)   | 2017 | TiO <sub>2</sub>                         | 0                 | MAPbI <sub>3</sub>                                                                  | one-step | spin     | no            | DMF              | spiro-OMeTAD | Li+TBP | 17   |
| Lu, J. et al., Adv. Energy Mater. 7, 1700444 (2017)   | 2017 | TiO <sub>2</sub>                         | 0                 | MA1-2xEDAxBPbI <sub>3</sub>                                                         | one-step | spin     | no            | DMF              | spiro-OMeTAD | Li+TBP | 18.6 |
| Lu, H. et al., Small 13, 1701535 (2017)               | 2017 | TiO <sub>2</sub>                         | 0                 | MAPbI <sub>3</sub>                                                                  | one-step | spin     | no            | DMF              | spiro-OMeTAD | Li+TBP | 16.9 |
| Luo, H. et al., Energy Technol. 5, 1814–1819 (2017)   | 2017 | TiO <sub>2</sub>                         | mTiO <sub>2</sub> | MAPbI <sub>3</sub>                                                                  | one-step | spin     | no            | DMF+DMSO         | spiro-OMeTAD | no     | 16.3 |
| Luo, H. et al., Energy Technol. 5, 1814–1819 (2017)   | 2017 | TiO <sub>2</sub>                         | mTiO <sub>2</sub> | MAPbI <sub>3</sub>                                                                  | one-step | spin     | no            | DMF+DMSO<br>+LiI | spiro-OMeTAD | no     | 18.3 |
| Luo, Q. et al., Adv. Funct. Mater. 27, 1702090 (2017) | 2017 | $\alpha$ -Fe <sub>2</sub> O <sub>3</sub> | 0                 | MAPbI <sub>3</sub>                                                                  | one-step | spin 2-3 | toluene       | DMF+DMSO         | spiro-OMeTAD | Li+TBP | 15   |
| Luo, Q. et al., Adv. Funct. Mater. 27, 1702090 (2017) | 2017 | TiO <sub>2</sub>                         | mTiO <sub>2</sub> | MAPbI <sub>3</sub>                                                                  | one-step | spin 2-3 | toluene       | DMF+DMSO         | spiro-OMeTAD | Li+TBP | 13.9 |

|                                                                         |      |                                          |                                             |                             |          |          |         |           |              |               |      |
|-------------------------------------------------------------------------|------|------------------------------------------|---------------------------------------------|-----------------------------|----------|----------|---------|-----------|--------------|---------------|------|
| Luo, Q. et al., Adv. Funct. Mater. 27, 1702090 (2017)                   | 2017 | $\alpha$ -Fe <sub>2</sub> O <sub>3</sub> | m- $\alpha$ -Fe <sub>2</sub> O <sub>3</sub> | MAPbI <sub>3</sub>          | one-step | spin 2-3 | toluene | DMF+DMSO  | spiro-OMeTAD | Li+TBP        | 18.1 |
| Mabrouk, S. et al., Sustain. Energy Fuels 1, 2162–2171 (2017)           | 2017 | TiO <sub>2</sub>                         | mTiO <sub>2</sub>                           | MAPbI <sub>3</sub>          | two-step | spin-dip | no      | DMF       | spiro-OMeTAD | Li+TBP+FK 209 | 11.3 |
| Mabrouk, S. et al., Sustain. Energy Fuels 1, 2162–2171 (2017)           | 2017 | TiO <sub>2</sub>                         | mTiO <sub>2</sub>                           | MAPbI <sub>3</sub>          | two-step | spin-dip | no      | DMF+BMIml | spiro-OMeTAD | Li+TBP+FK 209 | 18   |
| Mabrouk, S. et al., Sustain. Energy Fuels 1, 2162–2171 (2017)           | 2017 | TiO <sub>2</sub>                         | mTiO <sub>2</sub>                           | MAPbI <sub>3</sub>          | two-step | spin-dip | no      | DMF+Li    | spiro-OMeTAD | Li+TBP+FK 209 | 15.6 |
| Mabrouk, S. et al., Sustain. Energy Fuels 1, 2162–2171 (2017)           | 2017 | TiO <sub>2</sub>                         | mTiO <sub>2</sub>                           | MAPbI <sub>3</sub>          | two-step | spin-dip | no      | DMF+Li    | spiro-OMeTAD | Li+TBP+FK 209 | 17   |
| Mahmud, M. A. et al., Phys. Chem. Chem. Phys. 19, 21033–21045 (2017)    | 2017 | ZnO                                      | 0                                           | MA0.6FA0.4 PbI <sub>3</sub> | one-step | spin     | no      | DMF       | FDT          | Li+TBP        | 12.9 |
| Mahmud, M. A. et al., Phys. Chem. Chem. Phys. 19, 21033–21045 (2017)    | 2017 | ZnO                                      | 0                                           | MA0.6FA0.4 PbI <sub>3</sub> | one-step | spin     | no      | DMF       | FDT          | F4TCNQ        | 14.7 |
| Mahmud, M. A. et al., Sol. Energy Mater. Sol. Cells 159, 251–264 (2017) | 2017 | ZnO                                      | 0                                           | MAPbI <sub>3</sub>          | two-step | spin-dip | no      | DMF+TBP   | P3HT         | Li+TBP        | 8.8  |
| Mali, S. S. et al., Nanoscale 9, 3095–3104 (2017)                       | 2017 | TiO <sub>2</sub>                         | 0                                           | MAPbI <sub>3</sub> -xBrx    | one-step | spin 2-3 | toluene | DMSO+GBL  | PTAA         | Li+TBP        | 16.9 |



|                                                             |      |      |       |                                                           |          |      |    |     |              |                  |      |
|-------------------------------------------------------------|------|------|-------|-----------------------------------------------------------|----------|------|----|-----|--------------|------------------|------|
| Mali, S. S. et al., Mater. Today Chem. 4, 53–63 (2017).     | 2017 | TiO2 | mTiO2 | MAPbI3                                                    | two-step | spin | no | DMF | carbon+MAI   | no               | 13.9 |
| Mali, S. S. et al., Mater. Today Chem.4, 53–63 (2017).      | 2017 | TiO2 | mTiO2 | MAPbI3                                                    | two-step | spin | no | DMF | spiro-OMeTAD | Li+TBP           | 15   |
| Mali, S. S. et al., J. Mater. Chem. A 5, 12340–12353 (2017) | 2017 | TiO2 | mTiO2 | MAPbI3                                                    | one-step | spin | no | GBL | PTAA         | Li+TBP           | 14   |
| Mali, S. S. et al., J. Mater. Chem. A 5, 12340–12353 (2017) | 2017 | TiO2 | TiO2  | MAPbI3                                                    | one-step | spin | no | GBL | PTAA         | Li+TBP           | 14.9 |
| Mali, S. S. et al., J. Mater. Chem. A 5, 12340–12353 (2017) | 2017 | TiO2 | TiO2  | MAPbI3                                                    | one-step | spin | no | GBL | PTAA         | Li+TBP           | 14.7 |
| Mali, S. S. et al., J. Mater. Chem. A 5, 12340–12353 (2017) | 2017 | TiO2 | TiO2  | MAPbI3-xClx                                               | one-step | spin | no | GBL | PTAA         | Li+TBP           | 15.9 |
| Mali, S. S. et al., J. Mater. Chem. A 5, 12340–12353 (2017) | 2017 | TiO2 | TiO2  | (FAPbI3) <sub>0.8</sub><br>5<br>(MAPbBr3) <sub>0.15</sub> | one-step | spin | no | GBL | PTAA         | Li+TBP           | 17.6 |
| Mali, S. S. et al., J. Mater. Chem. A 5, 12340–12353 (2017) | 2017 | TiO2 | mTiO2 | MAPbI3                                                    | one-step | spin | no | GBL | spiro-OMeTAD | Li+TBP           | 11.9 |
| Mali, S. S. et al., J. Mater. Chem. A 5, 12340–12353 (2017) | 2017 | TiO2 | TiO2  | MAPbI3                                                    | one-step | spin | no | GBL | spiro-OMeTAD | Li+TBP           | 15   |
| Mali, S. S. et al., J. Mater. Chem. A 5, 12340–12353 (2017) | 2017 | TiO2 | TiO2  | MAPbI3                                                    | one-step | spin | no | GBL | spiro-OMeTAD | Li+TBP           | 12.5 |
| Mu, C. et al., Adv. Energy Mater. 7, 1601297 (2017)         | 2017 | TiO2 | 0     | FAPbI <sub>2.8</sub> Cl <sub>0.2</sub>                    | one-step | spin | no | DMF | spiro-OMeTAD | Li+TBP+FK<br>209 | 17.4 |

|                                                       |      |      |       |                                   |          |          |                  |          |              |               |      |
|-------------------------------------------------------|------|------|-------|-----------------------------------|----------|----------|------------------|----------|--------------|---------------|------|
| Mu, C. et al., Adv. Energy Mater. 7, 1601297 (2017)   | 2017 | TiO2 | 0     | FAPbI3                            | one-step | spin     | no               | DMF      | spiro-OMeTAD | Li+TBP+FK 209 | 15.7 |
| Nia, N. Y. et al., ChemSusChem 10, 3854–3860 (2017)   | 2017 | TiO2 | mTiO2 | MAPbI3                            | two-step | spin-dip | no               | DMF      | P3HT         | Li+TBP        | 16.9 |
| Nia, N. Y. et al., ChemSusChem 10, 3854–3860 (2017)   | 2017 | TiO2 | mTiO2 | MAPbI3                            | two-step | spin-dip | no               | DMF      | spiro-OMeTAD | Li+TBP        | 17.8 |
| Paek, S. et al., Adv. Mater. 29, 1606555 (2017)       | 2017 | TiO2 | mTiO2 | PbI2, FAI, PbBr2, MABr            | one-step | spin     | trifluorotoluene | DMF+DMSO | FA-CN        | no            | 18.9 |
| Paek, S. et al., Adv. Mater. 29, 1606555 (2017)       | 2017 | TiO2 | mTiO2 | PbI2, FAI, PbBr2, MABr            | one-step | spin     | trifluorotoluene | DMF+DMSO | TPA-CN       | no            | 17.5 |
| Paek, S. et al., Adv. Mater. 29, 1606555 (2017)       | 2017 | TiO2 | mTiO2 | PbI2, FAI, PbBr2, MABr            | one-step | spin     | trifluorotoluene | DMF+DMSO | spiro-OMeTAD | Li+TBP+FK 209 | 19.2 |
| Peng, J. et al., Adv. Energy Mater. 7, 1601768 (2017) | 2017 | TiO2 | mTiO2 | MAPbI3                            | one-step | spin     | chlorobenzene    | DMF+DMSO | spiro-OMeTAD | Li+TBP        | 16.3 |
| Peng, J. et al., Adv. Energy Mater. 7, 1601768 (2017) | 2017 | TiO2 | mTiO2 | MAPbI3                            | one-step | spin     | chlorobenzene    | DMF+DMSO | spiro-OMeTAD | Li+TBP        | 16.1 |
| Peng, J. et al., Adv. Energy Mater. 7, 1601768 (2017) | 2017 | TiO2 | mTiO2 | MAPbI3                            | one-step | spin     | chlorobenzene    | DMF+DMSO | spiro-OMeTAD | Li+TBP        | 18.9 |
| Peng, J. et al., Adv. Energy Mater. 7, 1601768 (2017) | 2017 | TiO2 | mTiO2 | MAPbI3                            | one-step | spin     | chlorobenzene    | DMF+DMSO | spiro-OMeTAD | Li+TBP        | 18.8 |
| Peng, J. et al., Adv. Energy Mater. 7, 1601768 (2017) | 2017 | TiO2 | mTiO2 | Cs0.05(MA0.17FA0.83)0.98Pb(I83Br0 | one-step | spin     | chlorobenzene    | DMF+DMSO | spiro-OMeTAD | Li+TBP        | 18.8 |

|                                                              |      |                  |                   |                                                    |          |          |               |          |                |        |      |  |
|--------------------------------------------------------------|------|------------------|-------------------|----------------------------------------------------|----------|----------|---------------|----------|----------------|--------|------|--|
|                                                              |      |                  |                   | 17)                                                |          |          |               |          |                |        |      |  |
| Peng, J. et al., Adv. Energy Mater. 7, 1601768 (2017)        | 2017 | TiO <sub>2</sub> | mTiO <sub>2</sub> | Cs <sub>0.05</sub> (MAO.17FA0.83)0.98Pb(I83Br0.17) | one-step | spin     | chlorobenzene | DMF+DMSO | spiro-OMeTAD   | Li+TBP | 18.3 |  |
| Peng, J. et al., Adv. Energy Mater. 7, 1601768 (2017)        | 2017 | TiO <sub>2</sub> | mTiO <sub>2</sub> | Cs <sub>0.05</sub> (MAO.17FA0.83)0.98Pb(I83Br0.17) | one-step | spin     | chlorobenzene | DMF+DMSO | spiro-OMeTAD   | Li+TBP | 20.1 |  |
| Peng, J. et al., Adv. Energy Mater. 7, 1601768 (2017)        | 2017 | TiO <sub>2</sub> | mTiO <sub>2</sub> | Cs <sub>0.05</sub> (MAO.17FA0.83)0.98Pb(I83Br0.17) | one-step | spin     | chlorobenzene | DMF+DMSO | spiro-OMeTAD   | Li+TBP | 19.6 |  |
| Pham, N. D. et al., J. Mater. Chem. A 5, 5195–5203 (2017)    | 2017 | TiO <sub>2</sub> | mTiO <sub>2</sub> | MAPbI <sub>3</sub>                                 | one-step | spin     | diethyl ether | DMF+DMSO | spiro-OMeTAD   | Li+TBP | 17.1 |  |
| Pham, N. D. et al., J. Mater. Chem. A 5, 5195–5203 (2017)    | 2017 | TiO <sub>2</sub> | mTiO <sub>2</sub> | MAPbI <sub>3</sub> -xClx                           | one-step | spin     | diethyl ether | DMF+DMSO | spiro-OMeTAD   | Li+TBP | 18.9 |  |
| Prathapani, S. et al., Appl. Mater. Today 7, 112–119 (2017)  | 2017 | TiO <sub>2</sub> | mTiO <sub>2</sub> | MAPbI <sub>3</sub> -xClx                           | one-step | spin     | no            | DMF      | spiro-OMeTAD   | Li+TBP | 8.1  |  |
| Pratyusha, T. et al., Mater. Today Proc. 4, 6820–6826 (2017) | 2017 | TiO <sub>2</sub> | mTiO <sub>2</sub> | MAPbI <sub>3</sub>                                 | two-step | spin-dip | no            | DMF      | PCDTBT-PCPDTBT | no     | 5.1  |  |

|                                                               |      |                  |                   |                                                                                                 |          |          |               |          |              |        |      |
|---------------------------------------------------------------|------|------------------|-------------------|-------------------------------------------------------------------------------------------------|----------|----------|---------------|----------|--------------|--------|------|
| Pratyusha, T. et al., Mater. Today Proc. 4, 6820–6826 (2017)  | 2017 | TiO <sub>2</sub> | mTiO <sub>2</sub> | MAPbI <sub>3</sub>                                                                              | two-step | spin-dip | no            | DMF      | PCDTBT       | no     | 4.4  |
| Qiu, W. et al., Adv. Funct. Mater. 27, 1700920 (2017)         | 2017 | TiO <sub>2</sub> | PCBM              | FAPbI <sub>2.85</sub> Br <sub>0.15</sub>                                                        | two-step | spin     | no            | DMF+DMSO | spiro-OMeTAD | Li+TBP | 17.6 |
| Qiu, W. et al., Adv. Funct. Mater. 27, 1700920 (2017)         | 2017 | TiO <sub>2</sub> | PCBM              | FAPbI <sub>3</sub>                                                                              | two-step | spin     | no            | DMF+DMSO | spiro-OMeTAD | Li+TBP | 17.5 |
| Qiu, W. et al., Adv. Funct. Mater. 27, 1700920 (2017)         | 2017 | TiO <sub>2</sub> | PCBM              | Cs <sub>0.1</sub> FA <sub>0.9</sub> MA <sub>0.34</sub> PbI <sub>2.865</sub> Br <sub>0.135</sub> | two-step | spin     | no            | DMF+DMSO | spiro-OMeTAD | Li+TBP | 19.3 |
| Qiu, W. et al., Adv. Funct. Mater. 27, 1700920 (2017)         | 2017 | TiO <sub>2</sub> | PCBM              | Cs <sub>0.2</sub> FA <sub>0.8</sub> PbI <sub>3</sub>                                            | two-step | spin     | no            | DMF+DMSO | spiro-OMeTAD | Li+TBP | 17.5 |
| Qiu, L. et al., J. Phys. Chem. B 122, acs.jpcc.7b03921 (2017) | 2017 | TiO <sub>2</sub> | 0                 | MAPbI <sub>3</sub>                                                                              | one-step | spin     | diethyl ether | DMF+DMSO | spiro-OMeTAD | Li+TBP | 18.5 |
| Qiu, L. et al., J. Phys. Chem. B 122, acs.jpcc.7b03921 (2017) | 2017 | no               | no                | MAPbI <sub>3</sub>                                                                              | one-step | spin     | diethyl ether | DMF+DMSO | spiro-OMeTAD | Li+TBP | 13.5 |
| Qiu, Z. et al., J. Am.Ceram. Soc. 100, 176–184 (2017)         | 2017 | ZnO              | PCBM              | MAPbI <sub>3</sub> -xClx                                                                        | two-step | spin     | no            | DMF      | P3HT         | no     | 7.5  |
| Rajmohan, G. D. et al., Thin Solid Films 636, 307–313 (2017)  | 2017 | TiO <sub>2</sub> | 0                 | MAPbI <sub>3</sub>                                                                              | one-step | spin     | no            | DMF      | spiro-OMeTAD | Li+TBP | 9.3  |
| Ren, Y. K. et al., J. Alloys Compd. 705, 205–210 (2017)       | 2017 | TiO <sub>2</sub> | mTiO <sub>2</sub> | MAPbI <sub>3</sub>                                                                              | one-step | spin 2-3 | chlorobenzene | DMF      | spiro-OMeTAD | Li+TBP | 9.6  |
| Ren, Y. K. et al., J. Alloys Compd. 705, 205–210 (2017)       | 2017 | TiO <sub>2</sub> | mTiO <sub>2</sub> | MAPbI <sub>3</sub>                                                                              | one-step | spin 2-3 | chlorobenzene | DMF+DMSO | spiro-OMeTAD | Li+TBP | 16.4 |

|                                                                   |      |      |       |                        |          |          |               |          |              |               |      |
|-------------------------------------------------------------------|------|------|-------|------------------------|----------|----------|---------------|----------|--------------|---------------|------|
| Sanehira, E. M. et al., Sci. Adv. 3, eaao4204 (2017)              | 2017 | TiO2 | 0     | CsPbI3 QD              | two-step | spin-dip | no            | na       | spiro-OMeTAD | Li+TBP        | 8.5  |
| Sanehira, E. M. et al., Sci. Adv. 3, eaao4204 (2017)              | 2017 | TiO2 | 0     | FA- CsPbI3 QD          | two-step | spin-dip | no            | na       | spiro-OMeTAD | Li+TBP        | 13.4 |
| Seo, G. et al., ACS Energy Lett. 2, 1705–1710 (2017)              | 2017 | TiO2 | mTiO2 | MAPbI3                 | two-step | spin-dip | no            | DMF      | spiro-OMeTAD | Li+TBP        | 17.7 |
| Shai, X. et al., Nano Energy 36, 213–222 (2017)                   | 2017 | TiO2 | 0     | MAPbI3-xClx            | two-step | spin     | no            | DMF      | spiro-OMeTAD | Li+TBP        | 16.7 |
| Shai, X. et al., Nano Energy 36, 213–222 (2017)                   | 2017 | TiO2 | 0     | MASr0.05Pb 0.95I3-xClx | two-step | spin     | no            | DMF      | spiro-OMeTAD | Li+TBP        | 16.3 |
| Shi, B. et al., Sol. Energy Mater. Sol. Cells 168, 214–220 (2017) | 2017 | TiO2 | 0     | MAPbI3-xBrx            | one-step | spin 2-3 | chlorobenzene | DMF+DMSO | spiro-OMeTAD | Li+TBP        | 17.9 |
| Shi, B. et al., Sol. Energy Mater. Sol. Cells 168, 214–220 (2017) | 2017 | TiO2 | 0     | MAPbI3-xBrx            | one-step | spin 2-3 | chlorobenzene | DMF+DMSO | spiro-OMeTAD | Li+TBP        | 15.3 |
| Shi, B. et al., Sol. Energy Mater. Sol. Cells 168, 214–220 (2017) | 2017 | TiO2 | 0     | MAPbI3-xClx            | two-step | CVD      | no            | na       | spiro-OMeTAD | Li+TBP        | 13.2 |
| Shi, B. et al., Sol. Energy Mater. Sol. Cells 168, 214–220 (2017) | 2017 | TiO2 | 0     | MAPbI3-xClx            | two-step | CVD      | no            | na       | spiro-OMeTAD | Li+TBP        | 13.1 |
| Sidhik, S. et al., J. Phys. Chem. C 121, 4239–4245 (2017)         | 2017 | TiO2 | mTiO2 | MAPbI3                 | one-step | spin     | ethoxyethane  | DMF+DMSO | spiro-OMeTAD | Li+TBP+FK 209 | 12.3 |

|                                                                      |      |                    |                   |                                      |          |          |    |          |              |                  |      |
|----------------------------------------------------------------------|------|--------------------|-------------------|--------------------------------------|----------|----------|----|----------|--------------|------------------|------|
| Sin, D. H. et al., ACS Appl. Mater. Interfaces 9, 18103–18112 (2017) | 2017 | ZnO                | 0                 | MAPbI <sub>3</sub>                   | two-step | spin     | no | DMF      | spiro-OMeTAD | Li+TBP           | 3.1  |
| Sin, D. H. et al., ACS Appl. Mater. Interfaces 9, 18103–18112 (2017) | 2017 | ZnO- PEG           | no                | MAPbI <sub>3</sub>                   | two-step | spin     | no | DMF      | spiro-OMeTAD | Li+TBP           | 15.5 |
| Sin, D. H. et al., ACS Appl. Mater. Interfaces 9, 18103–18112 (2017) | 2017 | ZnO- PEG           | no                | MAPbI <sub>3</sub>                   | two-step | spin     | no | DMF      | spiro-OMeTAD | Li+TBP           | 13.1 |
| Sudchanham, J. et al., ChemistrySelect 2, 369–374 (2017)             | 2017 | TiO <sub>2</sub>   | 0                 | MAPbI <sub>3</sub> -xCl <sub>x</sub> | one-step | spin     | no | DMF      | spiro-OMeTAD | Li+TBP+FK<br>102 | 11.7 |
| Sun, M. et al., Appl. Surf. Sci. 416, 124–132 (2017)                 | 2017 | TiO <sub>2</sub>   | mTiO <sub>2</sub> | MAPbI <sub>3</sub>                   | two-step | spin-dip | no | DMF      | no           | no               | 7.1  |
| Sun, M. et al., Appl. Surf. Sci. 416, 124–132 (2017)                 | 2017 | TiO <sub>2</sub>   | mTiO <sub>2</sub> | MAPbI <sub>3</sub>                   | two-step | spin-dip | no | DMF      | Me-QTPA      | no               | 9.1  |
| Sun, M. et al., Appl. Surf. Sci. 416, 124–132 (2017)                 | 2017 | TiO <sub>2</sub>   | mTiO <sub>2</sub> | MAPbI <sub>3</sub>                   | two-step | spin-dip | no | DMF      | Me-BPZTPA    | no               | 8.2  |
| Sun, M. et al., Appl. Surf. Sci. 416, 124–132 (2017)                 | 2017 | TiO <sub>2</sub>   | mTiO <sub>2</sub> | MAPbI <sub>3</sub>                   | two-step | spin-dip | no | DMF      | spiro-OMeTAD | no               | 5.5  |
| Sun, M. et al., Appl. Surf. Sci. 416, 124–132 (2017)                 | 2017 | TiO <sub>2</sub>   | mTiO <sub>2</sub> | MAPbI <sub>3</sub>                   | two-step | spin-dip | no | DMF      | spiro-OMeTAD | Li+TBP           | 13.7 |
| Sun, C. et al., J. Alloys Compd. 722, 196–206 (2017)                 | 2017 | BaSnO <sub>3</sub> | 0                 | MAPbI <sub>3</sub>                   | one-step | spin     | no | DMF+DMSO | spiro-OMeTAD | Li+TBP           | 11   |

|                                                                    |      |      |       |                              |          |          |               |                                    |              |        |      |
|--------------------------------------------------------------------|------|------|-------|------------------------------|----------|----------|---------------|------------------------------------|--------------|--------|------|
| Sun, M. et al., J. Mater. Chem. A 5, 13448–13456 (2017)            | 2017 | TiO2 | mTiO2 | MAPbI3                       | one-step | spin 2-3 | chlorobenzene | DMF+DMSO                           | spiro-OMeTAD | Li+TBP | 15.5 |
| Sun, M. et al., J. Mater. Chem. A 5, 13448–13456 (2017)            | 2017 | TiO2 | mTiO2 | MAPbI3                       | one-step | spin 2-3 | chlorobenzene | DMF+DMSO<br>+2-<br>pyridylthiourea | spiro-OMeTAD | Li+TBP | 18.2 |
| Tong, G. et al., RSC Adv. 7, 19457–19463 (2017)                    | 2017 | CdS  | 0     | MAPbI3                       | two-step | vasp     | no            | na                                 | spiro-OMeTAD | Li+TBP | 14.7 |
| Torabi, N. et al., Org. Electron. 48, 211–216 (2017)               | 2017 | TiO2 | mTiO2 | MAPbI3                       | two-step | spin-dip | no            | DMF                                | no           | no     | 5.5  |
| Torabi, N. et al., Org. Electron. 48, 211–216 (2017)               | 2017 | TiO2 | mTiO2 | MAPbI3                       | two-step | spin-dip | no            | DMF                                | CuPC         | no     | 14.9 |
| Torabi, N. et al., Org. Electron. 48, 211–216 (2017)               | 2017 | TiO2 | mTiO2 | MAPbI3                       | two-step | spin-dip | no            | DMF                                | spiro-OMeTAD | Li+TBP | 13.4 |
| Tu, Y. et al., Sci. Rep. 7, 44603 (2017)                           | 2017 | TiO2 | mTiO2 | MAPbI3                       | one-step | spin     | diethyl ether | DMF+DMSO                           | spiro-OMeTAD | Li+TBP | 15.6 |
| Tu, Y. et al., Sci. Rep. 7, 44603 (2017)                           | 2017 | TiO2 | mTiO2 | MAPbI <sub>2.86Br</sub> 0.14 | one-step | spin     | diethyl ether | DMF+DMSO                           | spiro-OMeTAD | Li+TBP | 18   |
| Upama, M. B. et al., Org. Electron. 50, 279–289 (2017)             | 2017 | PCBM | 0     | MAPbI3                       | one-step | spin     | no            | DMF                                | spiro-OMeTAD | Li+TBP | 13.9 |
| Wang, S. et al., Sol. Energy Mater. Sol. Cells 167, 173–177 (2017) | 2017 | TiO2 | mTiO2 | MAPbI3                       | two-step | spin-dip | no            | DMF                                | spiro-OMeTAD | Li+TBP | 19.6 |

|                                                               |      |             |              |                                        |          |          |                   |            |              |        |      |
|---------------------------------------------------------------|------|-------------|--------------|----------------------------------------|----------|----------|-------------------|------------|--------------|--------|------|
| Wang, L.-Y. et al., <i>Nanoscale</i> 9, 17893–17901 (2017)    | 2017 | TiO2        | mTiO2        | MAPbI3                                 | one-step | spin     | diisopropyl ether | DMF+DMSO   | spiro-OMeTAD | Li+TBP | 19.1 |
| Wang, Z. et al., <i>Nat. Energy</i> 2, 17135 (2017)           | 2017 | SnO2        | PCBM- N-DPBI | BA0.05(FA0.83Cs0.17)0.95Pb(I0.8Br0.2)3 | one-step | spin     | no                | DMF+HI+HBr | spiro-OMeTAD | Li+TBP | 20.5 |
| Wang, Z. et al., <i>Nat. Energy</i> 2, 17135 (2017)           | 2017 | SnO2        | PCBM- N-DPBI | FA0.83Cs0.17Pb(I0.6Br0.4)3             | one-step | spin     | no                | DMF+HI+HBr | spiro-OMeTAD | Li+TBP | 16.9 |
| Wang, Z. et al., <i>Nat. Energy</i> 2, 17135 (2017)           | 2017 | SnO2        | PCBM- N-DPBI | BA0.09(FA0.83Cs0.17)0.91Pb(I0.6Br0.4)3 | one-step | spin     | no                | DMF+HI+HBr | spiro-OMeTAD | Li+TBP | 16.6 |
| Wang, Z. et al., <i>Adv. Mater.</i> 29, 1604186 (2017)        | 2017 | C60-N- DPBI | 0            | MAPbI3-xClx                            | one-step | spin 2-3 | no                | DMF        | spiro-OMeTAD | Li+TBP | 18.3 |
| Wang, Z. et al., <i>Adv. Mater.</i> 29, 1604186 (2017)        | 2017 | C60         | 0            | MAPbI3-xClx                            | one-step | spin 2-3 | no                | DMF        | spiro-OMeTAD | Li+TBP | 17   |
| Wang, X. et al., <i>Electrochim. Acta</i> 245, 839–845 (2017) | 2017 | TiO2        | TiO2         | MAPbI3-xClx                            | one-step | spin     | no                | DMF        | spiro-OMeTAD | Li+TBP | 13.4 |
| Wang, X. et al., <i>Electrochim. Acta</i> 245, 839–845 (2017) | 2017 | TiO2        | TiO2         | MAPbI3-xClx                            | one-step | spin     | no                | DMF        | spiro-OMeTAD | Li+TBP | 12.1 |
| Wang, X. et al., <i>Electrochim. Acta</i> 245, 839–845 (2017) | 2017 | TiO2        | TiO2         | MAPbI3-xClx                            | one-step | spin     | no                | DMF        | spiro-OMeTAD | Li+TBP | 11.1 |



|                                                                       |      |      |       |        |          |          |         |          |              |        |      |
|-----------------------------------------------------------------------|------|------|-------|--------|----------|----------|---------|----------|--------------|--------|------|
| Wang, X. et al., Optik (Stuttg). 150, 111–116 (2017)                  | 2017 | TiO2 | mTiO2 | MAPbI3 | two-step | spin     | no      | DMF      | spiro-OMeTAD | Li+TBP | 10.2 |
| Wang, X. et al., Optik (Stuttg). 150, 111–116 (2017)                  | 2017 | TiO2 | mTiO2 | MAPbI3 | two-step | spin     | no      | DMF      | spiro-OMeTAD | Li+TBP | 10.2 |
| Wang, M., Sci. Bull. 62, 249–255 (2017)                               | 2017 | no   | no    | FAPbI3 | two-step | spin     | no      | na       | spiro-OMeTAD | no     | 15.1 |
| Wang, M., Sci. Bull. 62, 249–255 (2017)                               | 2017 | no   | no    | FAPbI3 | two-step | spin     | no      | na       | spiro-OMeTAD | no     | 10.6 |
| Wang, W.-T. et al., ACS Appl. Mater. Interfaces 9, 10743–10751 (2017) | 2017 | ZnO  | 0     | MAPbI3 | two-step | spin     | no      | DMF      | spiro-OMeTAD | Li+TBP | 16.3 |
| Wang, W.-T. et al., ACS Appl. Mater. Interfaces 9, 10743–10751 (2017) | 2017 | ZnO  | 0     | MAPbI3 | two-step | spin     | no      | DMF      | spiro-OMeTAD | Li+TBP | 13.1 |
| Wang, F. et al., J. Phys. Chem. C 121, 1562–1568 (2017)               | 2017 | TiO2 | mTiO2 | MAPbI3 | one-step | spin     | toluene | DMSO     | spiro-OMeTAD | Li+TBP | 16.4 |
| Wang, F. et al., J. Phys. Chem. C 121, 1562–1568 (2017)               | 2017 | TiO2 | mTiO2 | MAPbI3 | one-step | spin     | toluene | DMSO     | spiro-OMeTAD | Li+TBP | 14.6 |
| Wang, L. et al., Electrochim. Acta 235, 640–645 (2017)                | 2017 | TiO2 | 0     | MAPbI3 | two-step | spin-dip | no      | DMF      | spiro-OMeTAD | Li+TBP | 9.2  |
| Wang, H. et al., ACS Appl. Mater. Interfaces 9, 21756–21762 (2017)    | 2017 | TiO2 | 0     | MAPbI3 | one-step | spin 2-3 | no      | DMSO+GBL | spiro-OMeTAD | Li+TBP | 16.7 |

|                                                           |      |      |       |        |          |      |    |              |              |        |      |
|-----------------------------------------------------------|------|------|-------|--------|----------|------|----|--------------|--------------|--------|------|
| Wang, L. et al., Energy Storage Mater. 7, 40–47 (2017)    | 2017 | TiO2 | mTiO2 | MAPbI3 | two-step | spin | no | DMF+DMSO     | spiro-OMeTAD | Li+TBP | 16   |
| Wang, L. et al., Energy Storage Mater. 7, 40–47 (2017)    | 2017 | TiO2 | mTiO2 | MAPbI3 | two-step | spin | no | DMF+DMSO     | spiro-OMeTAD | Li+TBP | 13.5 |
| Wang, L. et al., Energy Storage Mater. 7, 40–47 (2017)    | 2017 | TiO2 | mTiO2 | MAPbI3 | two-step | spin | no | DMF+DMSO     | spiro-OMeTAD | Li+TBP | 12.4 |
| Wang, L. et al., Energy Storage Mater. 7, 40–47 (2017)    | 2017 | TiO2 | mTiO2 | MAPbI3 | two-step | spin | no | DMF+DMSO     | spiro-OMeTAD | Li+TBP | 12.2 |
| Wang, L. et al., Energy Storage Mater. 7, 40–47 (2017)    | 2017 | TiO2 | mTiO2 | MAPbI3 | two-step | spin | no | DMF+DMSO     | spiro-OMeTAD | Li+TBP | 11.4 |
| Wei, W. et al., J. Mater. Chem. A 5, 7749–7752 (2017)     | 2017 | TiO2 | 0     | MAPbI3 | two-step | spin | no | DMF          | no           | no     | 10.1 |
| Wei, W. et al., Ind. Eng. Chem. Res. 56, 1803–1809 (2017) | 2017 | TiO2 | 0     | MAPbI3 | two-step | spin | no | DMF          | no           | no     | 4.7  |
| Wei, W. et al., Ind. Eng. Chem. Res. 56, 1803–1809 (2017) | 2017 | TiO2 | 0     | MAPbI3 | two-step | spin | no | DMF          | no           | no     | 4.4  |
| Wei, W. et al., Ind. Eng. Chem. Res. 56, 1803–1809 (2017) | 2017 | TiO2 | 0     | MAPbI3 | two-step | spin | no | DMF+graphene | no           | no     | 4.7  |
| Wei, W. et al., Ind. Eng. Chem. Res. 56, 1803–1809 (2017) | 2017 | TiO2 | 0     | MAPbI3 | two-step | spin | no | DMF+MCN      | no           | no     | 10.4 |

|                                                                   |      |      |   |                                          |          |          |               |                 |              |        |      |
|-------------------------------------------------------------------|------|------|---|------------------------------------------|----------|----------|---------------|-----------------|--------------|--------|------|
| Wu, S. et al., J. Power Sources 359, 303–310 (2017)               | 2017 | TiO2 | 0 | MAPbI3-xClx                              | one-step | spin     | no            | DMF             | spiro-OMeTAD | Li+TBP | 15.3 |
| Wu, S. et al., J. Power Sources 359, 303–310 (2017)               | 2017 | TiO2 | 0 | MAPbI3-xClx                              | one-step | spin     | no            | DMF+CuPc(t Bu)4 | spiro-OMeTAD | Li+TBP | 17.3 |
| Wu, F. and Zhu, L., Sol. Energy Mater. Sol. Cells 167, 1–6 (2017) | 2017 | TiO2 | 0 | MAPbI3-xClx                              | one-step | spin     | no            | DMF             | spiro-OMeTAD | Li+TBP | 12.9 |
| Wu, F. and Zhu, L., Sol. Energy Mater. Sol. Cells 167, 1–6 (2017) | 2017 | TiO2 | 0 | MAPbI3-xClx                              | one-step | spin     | no            | DMF             | spiro-OMeTAD | Li+TBP | 19.1 |
| Wu, F. et al., Dye. Pigment. 143, 356–360 (2017)                  | 2017 | TiO2 | 0 | MAPbI3-xClx                              | one-step | spin     | no            | DMF             | JY5          | Li+TBP | 16.9 |
| Wu, F. et al., Dye. Pigment. 143, 356–360 (2017)                  | 2017 | TiO2 | 0 | MAPbI3-xClx                              | one-step | spin     | no            | DMF             | X51          | Li+TBP | 13.2 |
| Wu, F. et al., Dye. Pigment. 143, 356–360 (2017)                  | 2017 | TiO2 | 0 | MAPbI3-xClx                              | one-step | spin     | no            | DMF             | spiro-OMeTAD | Li+TBP | 16.2 |
| Wu, T. et al., J. Power Sources 365, 1–6 (2017)                   | 2017 | TiO2 | 0 | Cs0.05(MA0.17FA0.83)0.95Pb(I0.83Br0.17)3 | one-step | spin 2-3 | chlorobenzene | DMF+DMSO        | spiro-OMeTAD | Li+TBP | 16   |
| Wu, T. et al., J. Power Sources 365, 1–6 (2017)                   | 2017 | TiO2 | 0 | Cs0.05(MA0.17FA0.83)0.95Pb(I0.83Br0.17)3 | one-step | spin 2-3 | chlorobenzene | DMF+DMSO +NMP   | spiro-OMeTAD | Li+TBP | 19.6 |

|                                                          |      |      |       |             |          |           |               |               |              |        |      |  |
|----------------------------------------------------------|------|------|-------|-------------|----------|-----------|---------------|---------------|--------------|--------|------|--|
|                                                          |      |      |       | 0.17)3      |          |           |               |               |              |        |      |  |
| Xiang, W. et al., J. Mater. Chem. A 5, 5486–5494 (2017)  | 2017 | TiO2 | no    | MAPbI3      | one-step | spin      | chlorobenzene | DMF           | spiro-OMeTAD | Li+TBP | 13.3 |  |
| Xiang, W. et al., J. Mater. Chem. A 5, 5486–5494 (2017)  | 2017 | TiO2 | no    | MAPbI3      | one-step | spin      | chlorobenzene | DMF+PDM Surea | spiro-OMeTAD | Li+TBP | 16.4 |  |
| Xiao, G. et al., Ceram. Int. 43, 12534–12539 (2017)      | 2017 | TiO2 | TiO2  | MAPbI3-xBrx | two-step | spin      | no            | DMSO          | spiro-OMeTAD | Li+TBP | 16.2 |  |
| Xiao, M. et al., J. Am. Chem. Soc. 139, 3378–3386 (2017) | 2017 | TiO2 | 0     | MAPbI3-xClx | one-step | spin      | no            | DMF           | P3OT         | no     | 6.9  |  |
| Xiao, M. et al., J. Am. Chem. Soc. 139, 3378–3386 (2017) | 2017 | TiO2 | 0     | MAPbI3-xClx | one-step | spin      | no            | DMF           | P3DT         | no     | 6.6  |  |
| Xiao, M. et al., J. Am. Chem. Soc. 139, 3378–3386 (2017) | 2017 | TiO2 | 0     | MAPbI3-xClx | one-step | spin      | no            | DMF           | P3DDT        | no     | 3.9  |  |
| Xiao, M. et al., J. Am. Chem. Soc. 139, 3378–3386 (2017) | 2017 | TiO2 | 0     | MAPbI3-xClx | one-step | spin      | no            | DMF           | P3HT         | no     | 9.6  |  |
| Xiao, Y. et al., J. Power Sources 342, 489–494 (2017)    | 2017 | TiO2 | mTiO2 | MAPbI3      | two-step | spin-dip  | no            | DMF           | no           | no     | 10.3 |  |
| Xiao, Y. et al., J. Power Sources 342, 489–494 (2017)    | 2017 | TiO2 | mTiO2 | MAPbI3      | two-step | spin-dip  | no            | DMF           | no           | no     | 12.1 |  |
| Xie, X. et al., Org. Electron. 44, 120–125 (2017)        | 2017 | PCBM | 0     | MAPbI3      | two-step | evap-spin | no            | na            | spiro-OMeTAD | Li+TBP | 7.9  |  |

|                                                                |      |                                |       |                                   |          |               |               |          |              |                  |      |
|----------------------------------------------------------------|------|--------------------------------|-------|-----------------------------------|----------|---------------|---------------|----------|--------------|------------------|------|
| Xie, X. et al., Org. Electron. 44, 120–125 (2017)              | 2017 | PFN<br>ITO/kismina<br>alsak mi | PCBM  | MAPbI3                            | two-step | evap-<br>spin | no            | na       | spiro-OMeTAD | Li+TBP           | 12.9 |
| Xu, Z. et al., J. Phys. Chem. C 121, 24389–24396 (2017)        | 2017 | TiO2                           | mTiO2 | MAPbI3                            | one-step | spin 2-3      | no            | DMSO+GBL | spiro-OMeTAD | Li+TBP           | 8.5  |
| Yang, G. et al., J. Mater. Chem. A 5, 1658–1666 (2017)         | 2017 | ZnO                            | 0     | MAPbI3                            | one-step | spin          | chlorobenzene | DMF+DMSO | P3HT         | no               | 11.4 |
| Yang, G. et al., J. Mater. Chem. A 5, 1658–1666 (2017)         | 2017 | SnO2                           | 0     | MAPbI3                            | one-step | spin          | diethyl ether | DMF+DMSO | spiro-OMeTAD | Li+TBP           | 18.3 |
| Yang, G. et al., Small 13, 1601769 (2017)                      | 2017 | SnO2                           | 0     | MAPbI3                            | one-step | spin 2-3      | diethyl ether | DMF+DMSO | spiro-OMeTAD | Li+TBP           | 17.3 |
| Yang, G. et al., Small 13, 1601769 (2017)                      | 2017 | SnO2                           | 0     | MAPbI3                            | one-step | spin 2-3      | diethyl ether | DMF+DMSO | spiro-OMeTAD | Li+TBP           | 13.4 |
| Ye, J. et al., Appl. Surf. Sci. 407, 427–433 (2017)            | 2017 | TiO2                           | mTiO2 | (FAPbI3)0.8<br>5<br>(MAPbBr3)0.15 | one-step | spin 2-3      | chlorobenzene | DMF+DMSO | spiro-OMeTAD | Li+TBP           | 18.5 |
| Ye, T. et al., ACS Appl. Mater. Interfaces 9, 2358–2368 (2017) | 2017 | TiO2                           | mTiO2 | FA0.81MA0.15Pb(I0.836Br0.15)3     | one-step | spin 2-3      | chlorobenzene | DMF+DMSO | spiro-OMeTAD | Li+TBP+FK<br>209 | 20.6 |
| Ye, T. et al., ACS Appl. Mater. Interfaces 9, 2358–2368 (2017) | 2017 | TiO2                           | mTiO2 | FA0.81MA0.15Pb(I0.836Br0.15)3     | one-step | spin 2-3      | chlorobenzene | DMF+DMSO | spiro-OMeTAD | Li+TBP+FK<br>209 | 17.1 |
| Yu, Y. et al., ACS Appl. Mater. Interfaces 9, 23624–           | 2017 | TiO2                           | mTiO2 | MAPbI3                            | one-step | spin          | diethyl ether | DMF+DMSO | spiro-OMeTAD | Li+TBP           | 15.4 |

|                                                                  |      |      |       |                 |          |          |               |          |              |               |      |  |
|------------------------------------------------------------------|------|------|-------|-----------------|----------|----------|---------------|----------|--------------|---------------|------|--|
| 23634 (2017)                                                     |      |      |       |                 |          |          |               |          |              |               |      |  |
| Yu, Y. et al., ACS Appl. Mater. Interfaces 9, 23624–23634 (2017) | 2017 | TiO2 | mTiO2 | MAPbI3          | one-step | spin     | n-hexane      | DMF+DMSO | spiro-OMeTAD | Li+TBP        | 15.7 |  |
| Yu, M. et al., Phys. Chem. Chem. Phys. 19, 19922–19927 (2017)    | 2017 | TiO2 | mTiO2 | MAPbI3-xClx     | one-step | spin     | no            | DMF      | spiro-OMeTAD | Li+TBP+FK 209 | 15.8 |  |
| Yu, M. et al., Phys. Chem. Chem. Phys. 19, 19922–19927 (2017)    | 2017 | TiO2 | 0     | MAPbI3          | two-step | spin     | no            | DMF      | spiro-OMeTAD | Li+TBP+FK 209 | 15.7 |  |
| Zhang, T. et al., Sci. Adv. 3, e1700841 (2017)                   | 2017 | TiO2 | no    | CsPbI3-xE D Al2 | one-step | spin     | no            | DMF      | spiro-OMeTAD | Li+TBP        | 11.7 |  |
| Zhang, C. et al., Nanoscale 9, 2852–2864 (2017)                  | 2017 | TiO2 | mTiO2 | MAPbI3          | one-step | spin 2-3 | chlorobenzene | DMSO+GBL | spiro-OMeTAD | Li+TBP+FK 209 | 15.1 |  |
| Zhang, C. et al., Nanoscale 9, 2852–2864 (2017)                  | 2017 | TiO2 | mTiO2 | MAPbI3          | one-step | spin 2-3 | chlorobenzene | DMSO+GBL | spiro-OMeTAD | Li+TBP+FK 209 | 12   |  |
| Zhang, C. et al., Nanoscale 9, 2852–2864 (2017)                  | 2017 | TiO2 | mTiO2 | MAPbI3          | one-step | spin 2-3 | chlorobenzene | DMSO+GBL | spiro-OMeTAD | Li+TBP+FK 209 | 16   |  |
| Zhang, C. et al., Nanoscale 9, 2852–2864 (2017)                  | 2017 | TiO2 | mTiO2 | MAPbI3          | one-step | spin 2-3 | chlorobenzene | DMSO+GBL | spiro-OMeTAD | Li+TBP+FK 209 | 10.7 |  |
| Zhang, C. et al., Energy Procedia 105, 793–798 (2017)            | 2017 | TiO2 | 0     | MAPbI3          | two-step | spin     | no            | DMF      | spiro-OMeTAD | Li+TBP        | 13.5 |  |

|                                                                     |      |      |       |                                          |          |          |               |          |              |              |      |
|---------------------------------------------------------------------|------|------|-------|------------------------------------------|----------|----------|---------------|----------|--------------|--------------|------|
| Zhang, F. et al., Nano Energy 41, 469–475 (2017)                    | 2017 | TiO2 | mTiO2 | (FAI)0.81(PbI2)0.85(MABr)0.15(PbBr2)0.15 | one-step | spin 2-3 | chlorobenzene | DMF+DMSO | Z26          | Li+TBP+FK209 | 20.1 |
| Zhang, F. et al., Nano Energy 41, 469–475 (2017)                    | 2017 | TiO2 | mTiO2 | (FAI)0.81(PbI2)0.85(MABr)0.15(PbBr2)0.15 | one-step | spin 2-3 | chlorobenzene | DMF+DMSO | Z25          | Li+TBP+FK209 | 16.9 |
| Zhang, F. et al., Nano Energy 41, 469–475 (2017)                    | 2017 | TiO2 | mTiO2 | (FAI)0.81(PbI2)0.85(MABr)0.15(PbBr2)0.15 | one-step | spin 2-3 | chlorobenzene | DMF+DMSO | spiro-OMeTAD | Li+TBP+FK209 | 20.6 |
| Zhang, X. et al., Sol. Energy 148, 70–77 (2017)                     | 2017 | TiO2 | 0     | MAPbI3-xClx                              | one-step | spin     | no            | DMF      | spiro-OMeTAD | Li+TBP       | 11.8 |
| Zhang, X. et al., Sol. Energy 148, 70–77 (2017)                     | 2017 | TiO2 | 0     | MAPbI3-xClx                              | one-step | spin     | no            | DMF+AI   | spiro-OMeTAD | Li+TBP       | 13.6 |
| Zhang, W. et al., ACS Appl. Mater. Interfaces 9, 38467–38476 (2017) | 2017 | ZnO  | 0     | MAPbI3                                   | two-step | spin-dip | no            | DMF+DMSO | spiro-OMeTAD | Li+TBP       | 17.5 |
| Zhang, W. et al., ACS Appl. Mater. Interfaces 9, 38467–38476 (2017) | 2017 | ZnO  | PCBM  | MAPbI3                                   | two-step | spin-dip | no            | DMF+DMSO | spiro-OMeTAD | Li+TBP       | 19.1 |

|                                                              |      |      |       |                |          |           |               |          |              |        |      |
|--------------------------------------------------------------|------|------|-------|----------------|----------|-----------|---------------|----------|--------------|--------|------|
| Zhang, M.-D. et al., Dye. Pigment. 146, 589–595 (2017)       | 2017 | TiO2 | 0     | MAPbI3         | one-step | spin      | chlorobenzene | na       | SYN1         | Li+TBP | 13.1 |
| Zhang, M.-D. et al., Dye. Pigment. 146, 589–595 (2017)       | 2017 | TiO2 | 0     | MAPbI3         | one-step | spin      | chlorobenzene | na       | PARA1        | Li+TBP | 11.4 |
| Zhang, M.-D. et al., Dye. Pigment. 146, 589–595 (2017)       | 2017 | TiO2 | 0     | MAPbI3         | one-step | spin      | chlorobenzene | na       | spiro-OMeTAD | Li+TBP | 12   |
| Zhao, P. et al. J. Mater. Chem. A 5, 7905–7911 (2017)        | 2017 | TiO2 | mTiO2 | MAPbI3         | one-step | spin      | diethyl ether | DMF+DMSO | spiro-OMeTAD | Li+TBP | 17.3 |
| Zhao, P. et al. J. Mater. Chem. A 5, 7905–7911 (2017)        | 2017 | TiO2 | mTiO2 | MA1-xKxPbI3    | one-step | spin      | diethyl ether | DMF+DMSO | spiro-OMeTAD | Li+TBP | 19.3 |
| Zhao, Y. et al., J. Power Sources 359, 147–156 (2017)        | 2017 | TiO2 | mTiO2 | FAPbI3         | two-step | spin-drip | no            | DMF+DMSO | spiro-OMeTAD | no     | 17.7 |
| Zhao, Y. et al., J. Power Sources 359, 147–156 (2017)        | 2017 | TiO2 | mTiO2 | FA0.6MA0.4PbI3 | two-step | spin-drip | no            | DMF+DMSO | spiro-OMeTAD | no     | 19.3 |
| Zheng, X. et al., Nano Lett. 17, 2496–2505 (2017)            | 2017 | TiO2 | mTiO2 | MAPbI3         | two-step | spin      | no            | DMF      | no           | no     | 15.2 |
| Zheng, X. et al., Nano Lett. 17, 2496–2505 (2017)            | 2017 | TiO2 | mTiO2 | MAPbI3         | two-step | spin      | no            | DMF      | no           | no     | 14.6 |
| Zheng, X. et al., Nano Lett. 17, 2496–2505 (2017)            | 2017 | TiO2 | mTiO2 | MAPbI3         | two-step | spin      | no            | DMF      | no           | no     | 10.7 |
| Zheng, Y.-Z. et al., J. Phys. Chem. Solids 107, 55–61 (2017) | 2017 | ZnO  | 0     | MAPbI3         | one-step | spin      | chlorobenzene | DMF      | spiro-OMeTAD | Li+TBP | 10.1 |



|                                                                     |      |                  |                   |                    |          |         |               |          |              |                  |      |
|---------------------------------------------------------------------|------|------------------|-------------------|--------------------|----------|---------|---------------|----------|--------------|------------------|------|
| Zheng, Y.-Z. et al., J. Phys. Chem. Solids 107, 55–61 (2017)        | 2017 | ZnO              | 0                 | MAPbI <sub>3</sub> | one-step | spin    | chlorobenzene | DMF      | spiro-OMeTAD | Li+TBP           | 6.5  |
| Zheng, Y.-Z. et al., J. Phys. Chem. Solids 107, 55–61 (2017)        | 2017 | ZnO              | 0                 | MAPbI <sub>3</sub> | one-step | spin    | chlorobenzene | DMF      | spiro-OMeTAD | Li+TBP           | 8.9  |
| Zheng, Y.-Z. et al., J. Phys. Chem. Solids 107, 55–61 (2017)        | 2017 | ZnO              | 0                 | MAPbI <sub>3</sub> | one-step | spin    | chlorobenzene | DMF      | spiro-OMeTAD | Li+TBP           | 12.7 |
| Zheng, Y.-Z. et al., J. Phys. Chem. Solids 107, 55–61 (2017)        | 2017 | ZnO              | 0                 | MAPbI <sub>3</sub> | one-step | spin    | chlorobenzene | DMF      | spiro-OMeTAD | Li+TBP           | 11.2 |
| Zheng, Y.-Z. et al., J. Phys. Chem. Solids 107, 55–61 (2017)        | 2017 | ZnO              | 0                 | MAPbI <sub>3</sub> | one-step | spin    | chlorobenzene | DMF      | spiro-OMeTAD | Li+TBP           | 10.9 |
| Zheng, X. et al., Nano Energy 38, 1–11 (2017)                       | 2017 | SnO <sub>2</sub> | PCBM              | MAPbI <sub>3</sub> | one-step | spin    | chlorobenzene | DMF+DMSO | spiro-OMeTAD | Li+TBP           | 19.6 |
| Zheng, X. et al., Nano Energy 38, 1–11 (2017)                       | 2017 | SnO <sub>2</sub> | PCBM              | MAPbI <sub>3</sub> | one-step | spin    | chlorobenzene | DMF+DMSO | spiro-OMeTAD | Li+TBP           | 18.8 |
| Zheng, L. et al., Energy Procedia 105, 188–193 (2017)               | 2017 | TiO <sub>2</sub> | 0                 | MAPbI <sub>3</sub> | two-step | spin    | no            | DMF      | spiro-OMeTAD | Li+TBP           | 15.3 |
| Zheng, L. et al., Energy Procedia 105, 188–193 (2017)               | 2017 | no               | no                | MAPbI <sub>3</sub> | two-step | spin    | no            | DMF      | spiro-OMeTAD | Li+TBP           | 15.1 |
| Zheng, J. et al., Sol. Energy Mater. Sol. Cells 168, 165–171 (2017) | 2017 | TiO <sub>2</sub> | mTiO <sub>2</sub> | MAPbI <sub>3</sub> | one-step | blowdry | no            | DMF+DMSO | spiro-OMeTAD | Li+TBP+FK<br>209 | 17.4 |
| Zheng, J. et al., Sol. Energy Mater. Sol. Cells 168, 165–171 (2017) | 2017 | TiO <sub>2</sub> | mTiO <sub>2</sub> | MAPbI <sub>3</sub> | one-step | spin    | no            | DMF+DMSO | spiro-OMeTAD | Li+TBP+FK<br>209 | 15.6 |

|                                                                     |      |       |       |             |          |          |    |         |              |        |      |
|---------------------------------------------------------------------|------|-------|-------|-------------|----------|----------|----|---------|--------------|--------|------|
| Zheng, L. et al., ACS Appl. Mater. Interfaces 9, 14129–14135 (2017) | 2017 | TiO2  | 0     | MAPbI3      | two-step | spin-dip | no | DMF     | spiro-OMeTAD | Li+TBP | 14.1 |
| Zheng, L. et al., ACS Appl. Mater. Interfaces 9, 14129–14135 (2017) | 2017 | PTEBS | 0     | MAPbI3      | two-step | spin-dip | no | DMF     | spiro-OMeTAD | Li+TBP | 15.4 |
| Zheng, L. et al., ACS Appl. Mater. Interfaces 9, 14129–14135 (2017) | 2017 | no    | no    | MAPbI3      | two-step | spin-dip | no | DMF     | spiro-OMeTAD | Li+TBP | 7.8  |
| Zong, X. et al., Tetrahedron 73, 3398–3405 (2017)                   | 2017 | TiO2  | mTiO2 | MAPbI3      | two-step | spin-dip | no | DMF     | Q221         | Li+TBP | 10.4 |
| Zong, X. et al., Tetrahedron 73, 3398–3405 (2017)                   | 2017 | TiO2  | mTiO2 | MAPbI3      | two-step | spin-dip | no | DMF     | Q222         | Li+TBP | 8.9  |
| Zong, X. et al., Tetrahedron 73, 3398–3405 (2017)                   | 2017 | TiO2  | mTiO2 | MAPbI3      | two-step | spin-dip | no | DMF     | spiro-OMeTAD | Li+TBP | 10.1 |
| Zuo, L. et al., Sci. Adv. 3, e1700106 (2017)                        | 2017 | SnO2  | no    | MAPbI3-xClx | two-step | spin     | no | DMF     | spiro-OMeTAD | Li+TBP | 18   |
| Zuo, L. et al., Sci. Adv. 3, e1700106 (2017)                        | 2017 | SnO2  | no    | MAPbI3-xClx | two-step | spin     | no | DMF+PAA | spiro-OMeTAD | Li+TBP | 19.6 |
| Zuo, L. et al., Sci. Adv. 3, e1700106 (2017)                        | 2017 | SnO2  | no    | MAPbI3-xClx | two-step | spin     | no | DMF+PEI | spiro-OMeTAD | Li+TBP | 16.7 |
| Zuo, L. et al., Sci. Adv. 3, e1700106 (2017)                        | 2017 | SnO2  | no    | MAPbI3-xClx | two-step | spin     | no | DMF+PVP | spiro-OMeTAD | Li+TBP | 20.2 |

|                                                          |      |            |        |              |          |           |    |     |              |        |      |
|----------------------------------------------------------|------|------------|--------|--------------|----------|-----------|----|-----|--------------|--------|------|
| Zuo, L. et al., Nano Lett. 17, 269–275 (2017)            | 2017 | SnO2       | 0      | MAPbI3-xClx  | two-step | spin-drip | no | DMF | spiro-OMeTAD | Li+TBP | 17.2 |
| Zuo, L. et al., Nano Lett. 17, 269–275 (2017)            | 2017 | SnO2       | PA-SAM | MAPbI3-xClx  | two-step | spin-drip | no | DMF | spiro-OMeTAD | Li+TBP | 18.8 |
| Adnan, M. and Lee, J. K., Sci. Rep. 8, 2168 (2018)       | 2018 | TiO2       | mTiO2  | MAPbI3       | two-step | dipping   | no | na  | spiro-OMeTAD | Li+TBP | 12.4 |
| Amini, M. et al., J. Mater. Chem. A 6, 2632–2642 (2018)  | 2018 | TiO2       | mTiO2  | MAPbI3       | one-step | spin      | no | DMF | spiro-OMeTAD | Li+TBP | 15.1 |
| Amini, M. et al., J. Mater. Chem. A 6, 2632–2642 (2018)  | 2018 | P123-ib    | mTiO2  | MAPbI3       | one-step | spin      | no | DMF | spiro-OMeTAD | Li+TBP | 16.7 |
| Bashir, A. et al., Nanoscale 10, 2341–2350 (2018)        | 2018 | TiO2       | mTiO2  | MAPbI3-5AVAI | one-step | spin      | no | GBL | no           | no     | 11.3 |
| Bashir, A. et al., Nanoscale 10, 2341–2350 (2018)        | 2018 | TiO2       | mTiO2  | MAPbI3-5AVAI | one-step | spin      | no | GBL | no           | no     | 9.3  |
| Bashir, A. et al., Nanoscale 10, 2341–2350 (2018)        | 2018 | TiO2       | mTiO2  | MAPbI3-5AVAI | one-step | spin      | no | GBL | Co3O4        | no     | 13.3 |
| Bashir, A. et al., Nanoscale 10, 2341–2350 (2018)        | 2018 | TiO2       | mTiO2  | MAPbI3-5AVAI | one-step | spin      | no | GBL | Co3O4        | no     | 11.7 |
| Chen, T.-P. et al., Adv. Energy Mater. 8, 1701722 (2018) | 2018 | TiO2       | 0      | MAPbI3-xClx  | one-step | spin      | no | DMF | spiro-OMeTAD | Li+TBP | 15.3 |
| Chen, T.-P. et al., Adv. Energy Mater. 8, 1701722 (2018) | 2018 | 2D titania | 0      | MAPbI3-xClx  | one-step | spin      | no | DMF | spiro-OMeTAD | Li+TBP | 15.2 |

|                                                          |      |                  |                   |                                                                 |          |          |               |          |              |             |      |
|----------------------------------------------------------|------|------------------|-------------------|-----------------------------------------------------------------|----------|----------|---------------|----------|--------------|-------------|------|
| Chen, T.-P. et al., Adv. Energy Mater. 8, 1701722 (2018) | 2018 | no               | no                | MAPbI <sub>3</sub> -xCl <sub>x</sub>                            | one-step | spin     | no            | DMF      | spiro-OMeTAD | Li+TBP      | 7.2  |
| Chen, R. et al., Energy Fuels 2, 1093–1100 (2018)        | 2018 | TiO <sub>2</sub> | 0                 | MAPb1-xClx                                                      | one-step | spin     | no            | DMF      | spiro-OMeTAD | Li+TBP      | 13.2 |
| Chen, R. et al., Energy Fuels 2, 1093–1100 (2018)        | 2018 | TiO <sub>2</sub> | 0                 | MAPb1-xZnxI3-yCl <sub>y</sub>                                   | one-step | spin     | no            | DMF      | spiro-OMeTAD | Li+TBP      | 16.9 |
| Christians, J. A. et al., Nat. Energy 3, 68–74 (2018)    | 2018 | TiO <sub>2</sub> | mTiO <sub>2</sub> | (FA0.76MA0<br>.<br>21Cs0.03)0.<br>67Pb(I0.89B<br>r<br>0.11)2.56 | one-step | spin 2-3 | chlorobenzene | DMF+DMSO | spiro-OMeTAD | Li+TBP      | 19.6 |
| Christians, J. A. et al., Nat. Energy 3, 68–74 (2018)    | 2018 | TiO <sub>2</sub> | mTiO <sub>2</sub> | (FA0.76MA0<br>.<br>21Cs0.03)0.<br>67Pb(I0.89B<br>r<br>0.11)2.56 | one-step | spin 2-3 | chlorobenzene | DMF+DMSO | spiro-OMeTAD | Li+TBP      | 14.4 |
| Christians, J. A. et al., Nat. Energy 3, 68–74 (2018)    | 2018 | SnO <sub>2</sub> | mTiO <sub>2</sub> | (FA0.76MA0<br>.<br>21Cs0.03)0.<br>67Pb(I0.89B<br>r<br>0.11)2.56 | one-step | spin 2-3 | chlorobenzene | DMF+DMSO | EH44         | EH44-ox+TBP | 12.3 |
| Christians, J. A. et al., Nat. Energy 3, 68–74 (2018)    | 2018 | TiO <sub>2</sub> | mTiO <sub>2</sub> | (FA0.76MA0<br>.<br>21Cs0.03)0.<br>67Pb(I0.89B<br>r<br>0.11)2.56 | one-step | spin 2-3 | chlorobenzene | DMF+DMSO | EH44         | EH44-ox+TBP | 16.8 |

|                                                                                           |      |          |       |                                           |          |          |               |          |              |                  |      |  |
|-------------------------------------------------------------------------------------------|------|----------|-------|-------------------------------------------|----------|----------|---------------|----------|--------------|------------------|------|--|
|                                                                                           |      |          |       | 21Cs0.03)0.67Pb(10.89Br<br>r<br>0.11)2.56 |          |          |               |          |              |                  |      |  |
| Deng, X. et al., Superlattices Microstruct. 117, 283–287 (2018)                           | 2018 | TiO2     | TiO2  | MAPbI3-xBrx                               | two-step | spin     | no            | DMF+DMSO | spiro-OMeTAD | Li+TBP+FK<br>209 | 18.1 |  |
| Deng, X. et al., Superlattices Microstruct. 117, 283–287 (2018)                           | 2018 | TiO2     | TiO2  | MAPbI3-xBrx                               | two-step | spin     | no            | DMF+DMSO | spiro-OMeTAD | Li+TBP+FK<br>209 | 16.4 |  |
| Domanski, K. et al., Nat. Energy 3, 61–67 (2018)                                          | 2018 | TiO2     | mTiO2 | Cs5(FA83MA17)95Pb(183Br17)3               | one-step | spin 2-3 | chlorobenzene | DMF+DMSO | spiro-OMeTAD | Li+TBP+FK<br>209 | 20.2 |  |
| Draguta, S. et al. Energy Environ. Sci. 11, 960–969 (2018)                                | 2018 | TiO2     | 0     | FAI, PbI2, MABr, PbBr2, CsI               | one-step | spin 2-3 | chlorobenzene | DMF+DMSO | spiro-OMeTAD | Li+TBP+FK<br>209 | 18.8 |  |
| Draguta, S. et al. Energy Environ. Sci. 11, 960–969 (2018)                                | 2018 | TiO2     | 0     | MAPbI3                                    | one-step | spin     | chlorobenzene | DMF+DMSO | spiro-OMeTAD | Li+TBP+FK<br>209 | 17.8 |  |
| Gomez, A. et al., Nano Energy 45, 94–100 (2018)                                           | 2018 | TiO2     | mTiO2 | FAI, PbI2, MABr, PbBr2, CsI               | one-step | spin 2-3 | chlorobenzene | DMF+DMSO | spiro-OMeTAD | Li+TBP+FK<br>209 | 17.3 |  |
| Guo, Y. et al., ACS Appl. Energy Mater. acsaem.8b00094 (2018). doi:10.1021/acsaem.8b00094 | 2018 | IL/PCB M | Nb2O5 | MAPbI3-xClx                               | one-step | spin     | no            | DMF      | spiro-OMeTAD | Li+TBP           | 18.8 |  |
| Guo, Y. et al., ACS Appl. Energy Mater. acsaem.8b00094 (2018). doi:10.1021/acsaem.8b00094 | 2018 | IL       | Nb2O5 | MAPbI3-xClx                               | one-step | spin     | no            | DMF      | spiro-OMeTAD | Li+TBP           | 16.4 |  |

|                                                                                          |      |                 |       |             |          |      |               |               |              |              |      |
|------------------------------------------------------------------------------------------|------|-----------------|-------|-------------|----------|------|---------------|---------------|--------------|--------------|------|
| Guo, Y. et al., ACS Appl. Energy Mater. acaem.8b00094 (2018). doi:10.1021/acsaem.8b00094 | 2018 | PCBM            | Nb2O5 | MAPbI3-xClx | one-step | spin | no            | DMF           | spiro-OMeTAD | Li+TBP       | 16.6 |
| Guo, Y. et al., Sol. Energy Mater. Sol. Cells 178, 186–192 (2018)                        | 2018 | TiO2            | 0     | MAPbI3      | one-step | spin | no            | DMF           | spiro-OMeTAD | Li+TBP       | 12.7 |
| Guo, Y. et al., Sol. Energy Mater. Sol. Cells 178, 186–192 (2018)                        | 2018 | TiO2            | CdS   | MAPbI3      | one-step | spin | no            | DMF           | spiro-OMeTAD | Li+TBP       | 16   |
| Hou, Q. et al., ChemElectroChem 5, 725 (2018)                                            | 2018 | $\alpha$ -Fe2O3 | 0     | MAPbI3      | one-step | spin | chlorobenzene | DMF           | spiro-OMeTAD | Li+TBP       | 12.1 |
| Hou, Q. et al., ChemElectroChem 5, 725 (2018)                                            | 2018 | $\alpha$ -Fe2O3 | PCBM  | MAPbI3      | one-step | spin | chlorobenzene | DMF           | spiro-OMeTAD | Li+TBP       | 14.2 |
| Jiang, H. et al., ACS Appl. Energy Mater. 1, 900–909 (2018)                              | 2018 | TiO2            | 0     | MAPbI3      | one-step | spin | no            | DMSO+GBL      | spiro-OMeTAD | Li+TBP       | 16.9 |
| Jiang, H. et al., ACS Appl. Energy Mater. 1, 900–909 (2018)                              | 2018 | TiO2            | 0     | MAPbI3      | one-step | spin | no            | DMSO+GBL+HaHc | spiro-OMeTAD | Li+TBP       | 18.7 |
| Kogo, A. et al., ACS Appl. Mater. Interfaces 10, 2224–2229 (2018)                        | 2018 | TiO2            | 0     | MAPbI3      | one-step | spin | no            | DMF+DMSO      | spiro-OMeTAD | Li+TBP+FK209 | 13.2 |
| Kogo, A. et al., ACS Appl. Mater. Interfaces 10, 2224–2229 (2018)                        | 2018 | 0               | mTiO2 | MAPbI3      | one-step | spin | no            | DMF+DMSO      | spiro-OMeTAD | Li+TBP+FK209 | 13   |
| Kogo, A. et al., ACS Appl. Mater. Interfaces 10, 2224–2229 (2018)                        | 2018 | SnO2            | mTiO2 | MAPbI3      | one-step | spin | no            | DMF+DMSO      | spiro-OMeTAD | Li+TBP+FK209 | 18.6 |

|                                                                   |      |      |       |                   |          |           |                        |               |              |               |      |
|-------------------------------------------------------------------|------|------|-------|-------------------|----------|-----------|------------------------|---------------|--------------|---------------|------|
| Kogo, A. et al., ACS Appl. Mater. Interfaces 10, 2224–2229 (2018) | 2018 | TiO2 | mTiO2 | MAPbI3            | one-step | spin      | no                     | DMF+DMSO      | spiro-OMeTAD | Li+TBP+FK 209 | 20.2 |
| Li, F. et al., Adv. Funct. Mater. 28, 1706377 (2018)              | 2018 | TiO2 | 0     | MAPbI3            | one-step | spin      | chlorobenzene          | DMSO+GBL      | spiro-OMeTAD | no            | 17.7 |
| Li, F. et al., Adv. Funct. Mater. 28, 1706377 (2018)              | 2018 | TiO2 | 0     | MAPbI3            | one-step | spin      | chlorobenzene +PF1     | DMSO+GBL      | spiro-OMeTAD | no            | 18.7 |
| Li, F. et al., Adv. Funct. Mater. 28, 1706377 (2018)              | 2018 | TiO2 | 0     | MAPbI3            | one-step | spin      | chlorobenzene +F+N2200 | DMSO+GBL      | spiro-OMeTAD | no            | 18.4 |
| Li, F. et al., Adv. Funct. Mater. 28, 1706377 (2018)              | 2018 | TiO2 | 0     | MAPbI3            | one-step | spin      | chlorobenzene +PF0     | DMSO+GBL      | spiro-OMeTAD | no            | 18.1 |
| Li, F. et al., Adv. Funct. Mater. 28, 1706377 (2018)              | 2018 | TiO2 | 0     | MAPbI3            | one-step | spin      | chlorobenzene +N2200   | DMSO+GBL      | spiro-OMeTAD | no            | 17.9 |
| Li, K. et al., Sci. Rep. 8, 442 (2018)                            | 2018 | C60  | 0     | MAPbI3            | two-step | evap-spin | no                     | na            | spiro-OMeTAD | Li+TBP        | 15   |
| Li, B. et al., Nat. Commun. 9, 1076-2018                          | 2018 | TiO2 | mTiO2 | CsPbI3            | one-step | spin      | no                     | DMF+DMSO +PVP | spiro-OMeTAD | no            | 10.7 |
| Li, B. et al., Nat. Commun. 9, 1076 (2018)                        | 2018 | TiO2 | mTiO2 | CsPbI2Br          | one-step | spin      | no                     | DMF+DMSO +PVP | spiro-OMeTAD | no            | 8    |
| Liu, N. et al., J. Mater. Chem. A 6, 6806–6814 (2018)             | 2018 | SnO2 | 0     | MAxFA1-xPbI3-yBry | two-step | spin      | no                     | DMF+DMSO      | spiro-OMeTAD | Li+TBP        | 20.6 |
| Liu, N. et al., J. Mater. Chem. A 6, 6806–6814 (2018)             | 2018 | SnO2 | 0     | MAxFA1-xPbI3-yBry | two-step | spin      | no                     | DMF+DMSO      | spiro-OMeTAD | Li+TBP        | 18.5 |

|                                                             |      |      |       |                                       |          |      |                  |          |        |              |      |
|-------------------------------------------------------------|------|------|-------|---------------------------------------|----------|------|------------------|----------|--------|--------------|------|
| Magomedov, A. et al., Adv. Funct. Mater. 28, 1704351 (2018) | 2018 | TiO2 | mTiO2 | Cs0.1(MA0.15FA0.85)0.9Pb(I0.85Br0.15) | one-step | spin | trifluorotoluene | DMF+DMSO | V885   | Li+TBP+FK209 | 18.9 |
| Magomedov, A. et al., Adv. Funct. Mater. 28, 1704351 (2018) | 2018 | TiO2 | mTiO2 | Cs0.1(MA0.15FA0.85)0.9Pb(I0.85Br0.15) | one-step | spin | trifluorotoluene | DMF+DMSO | V911   | Li+TBP+FK209 | 18.9 |
| Magomedov, A. et al., Adv. Funct. Mater. 28, 1704351 (2018) | 2018 | TiO2 | mTiO2 | Cs0.1(MA0.15FA0.85)0.9Pb(I0.85Br0.15) | one-step | spin | trifluorotoluene | DMF+DMSO | V886   | Li+TBP+FK209 | 18.5 |
| Magomedov, A. et al., Adv. Funct. Mater. 28, 1704351 (2018) | 2018 | TiO2 | mTiO2 | Cs0.1(MA0.15FA0.85)0.9Pb(I0.85Br0.15) | one-step | spin | trifluorotoluene | DMF+DMSO | V1no39 | Li+TBP+FK209 | 17.4 |
| Magomedov, A. et al., Adv. Funct. Mater. 28, 1704351 (2018) | 2018 | TiO2 | mTiO2 | Cs0.1(MA0.15FA0.85)0.9Pb(I0.85Br0.15) | one-step | spin | trifluorotoluene | DMF+DMSO | V946   | Li+TBP+FK209 | 17.1 |
| Magomedov, A. et al., Adv. Funct. Mater. 28, 1704351 (2018) | 2018 | TiO2 | mTiO2 | Cs0.1(MA0.15FA0.85)0.9Pb(I0.85Br0.15) | one-step | spin | trifluorotoluene | DMF+DMSO | V957   | Li+TBP+FK209 | 17.1 |
| Magomedov, A. et al., Adv. Funct. Mater. 28, 1704351 (2018) | 2018 | TiO2 | mTiO2 | Cs0.1(MA0.15FA0.85)0.9Pb(I0.85Br0.15) | one-step | spin | trifluorotoluene | DMF+DMSO | V928   | Li+TBP+FK209 | 16.5 |



|                                                                                               |      |      |       |                                        |          |          |                  |          |              |              |      |  |
|-----------------------------------------------------------------------------------------------|------|------|-------|----------------------------------------|----------|----------|------------------|----------|--------------|--------------|------|--|
|                                                                                               |      |      |       | 15)                                    |          |          |                  |          |              |              |      |  |
| Magomedov, A. et al., Adv. Funct. Mater. 28, 1704351 (2018)                                   | 2018 | TiO2 | mTiO2 | Cs0.1(MA0.15FA0.85)0.9Pb(I0.85Br0.15)  | one-step | spin     | trifluorotoluene | DMF+DMSO | V9no8        | Li+TBP+FK209 | 16.5 |  |
| Magomedov, A. et al., Adv. Funct. Mater. 28, 1704351 (2018)                                   | 2018 | TiO2 | mTiO2 | Cs0.1(MA0.15FA0.85)0.9Pb(I0.85Br0.15)  | one-step | spin     | trifluorotoluene | DMF+DMSO | V931         | Li+TBP+FK209 | 16.3 |  |
| Mathies, F. et al., ACS Appl. Energy Mater. acsaem.8b00222 (2018). doi:10.1021/acsaem.8b00222 | 2018 | TiO2 | 0     | Cs0.1(FA0.83MA0.17)0.9Pb(Br0.17I0.83)3 | one-step | printed  | no               | DMF+DMSO | spiro-OMeTAD | Li+TBP       | 15.3 |  |
| Ng, C. H. et al., Sci. Rep. 8, 2482 (2018)                                                    | 2018 | TiO2 | mTiO2 | CsPbBr3                                | two-step | spin-dip | no               | DMF      | P3HT         | no           | 3.1  |  |
| Ng, C. H. et al., Sci. Rep. 8, 2482 (2018)                                                    | 2018 | TiO2 | mTiO2 | CsPbBr2.9I0.1                          | two-step | spin-dip | no               | DMF      | P3HT         | no           | 2.5  |  |
| Ng, C. H. et al., Sci. Rep. 8, 2482 (2018)                                                    | 2018 | TiO2 | mTiO2 | CsPbBr2.9I0.1                          | two-step | spin-dip | no               | DMF      | spiro-OMeTAD | Li+TBP       | 4    |  |
| Ng, C. H. et al., Sci. Rep. 8, 2482 (2018)                                                    | 2018 | TiO2 | mTiO2 | CsPbBr3                                | two-step | spin-dip | no               | DMF      | spiro-OMeTAD | Li+TBP       | 3    |  |
| Nimens, W. J. et al., ACS Appl. Energy Mater. 1, acsaem.7b00147 (2018)                        | 2018 | TiO2 | 0     | MAPbI3-xClx                            | one-step | spin     | no               | DMF      | PTAA         | Li+TBP       | 13.5 |  |

|                                                                        |      |      |             |                        |          |          |                  |          |              |               |      |
|------------------------------------------------------------------------|------|------|-------------|------------------------|----------|----------|------------------|----------|--------------|---------------|------|
| Nimens, W. J. et al., ACS Appl. Energy Mater. 1, acsaem.7b00147 (2018) | 2018 | TiO2 | 0           | MAPbI3-xClx            | one-step | spin     | no               | DMF      | PTAA         | Li+TBP        | 6.3  |
| Nimens, W. J. et al., ACS Appl. Energy Mater. 1, acsaem.7b00147 (2018) | 2018 | 0    | mTiO2       | MAPbI3-xClx            | one-step | spin     | no               | DMF      | PTAA         | Li+TBP        | 7.7  |
| Suk, K., Thin Solid Films (2018). doi:10.1016/j.tsf.2018.04.017        | 2018 | ZnO  | 0           | FAPbI3-MAPbBr3         | one-step | spin 2-3 | toluene          | DMF+DMSO | spiro-OMeTAD | Li+TBP+FK 209 | 14.9 |
| Suk, K., Thin Solid Films (2018). doi:10.1016/j.tsf.2018.04.017        | 2018 | ZnO  | 0           | FAPbI3-MAPbBr3         | one-step | spin 2-3 | toluene          | DMF+DMSO | spiro-OMeTAD | Li+TBP+FK 209 | 13.7 |
| Pelicano, C. M. and Yanagi, H., J. Energy Chem. 27, 455–462 (2018)     | 2018 | ZnO  | ZnO-nanorod | MAPbI3                 | one-step | spin     | toluene          | DMF      | P3HT         | no            | 4.9  |
| Pelicano, C. M. and Yanagi, H., J. Energy Chem. 27, 455–462 (2018)     | 2018 | ZnO  | ZnO-nanorod | MAPbI3                 | one-step | spin     | toluene          | DMF      | P3HT         | no            | 3.4  |
| Que, M. et al., J. Power Sources 383, 42–49 (2018)                     | 2018 | TiO2 | mTiO2       | MAPbI3                 | one-step | spin 2-3 | chlorobenzene    | DMF+DMSO | spiro-OMeTAD | Li+TBP        | 15   |
| Que, M. et al., J. Power Sources 383, 42–49 (2018)                     | 2018 | TiO2 | mTiO2       | MAPbI3                 | one-step | spin 2-3 | chlorobenzene    | DMF+DMSO | spiro-OMeTAD | Li+TBP        | 17.9 |
| Raminafshar, C. et al., Electrochim. Acta 276, 261–267 (2018)          | 2018 | TiO2 | mZrO2       | (5-AVA) x (MA) 1-xPbI3 | one-step | drip     | no               | GBL      | no           | no            | 10.7 |
| Shao, F. et al., Sci. Rep. 8, 7033 (2018)                              | 2018 | TiO2 | mTiO2       | MAPbI3                 | one-step | spin 2-3 | trifluorotoluene | DMSO     | spiro-OMeTAD | Li+TBP+FK 209 | 16.4 |

|                                                                                           |      |      |       |                              |          |          |                  |             |              |              |      |
|-------------------------------------------------------------------------------------------|------|------|-------|------------------------------|----------|----------|------------------|-------------|--------------|--------------|------|
| Shao, F. et al., Sci. Rep. 8, 7033 (2018)                                                 | 2018 | TiO2 | mTiO2 | MAPbI3                       | one-step | spin 2-3 | trifluorotoluene | DMSO        | spiro-OMeTAD | Li+TBP+FK209 | 8.3  |
| Son, D.-Y. et al., J. Am. Chem. Soc. 140, jacs.7b10430 (2018)                             | 2018 | TiO2 | mTiO2 | MAPbI3                       | one-step | spin     | diethyl ether    | DMF+DMSO    | spiro-OMeTAD | Li+TBP       | 17.5 |
| Son, D.-Y. et al., J. Am. Chem. Soc. 140, jacs.7b10430 (2018)                             | 2018 | TiO2 | mTiO2 | FAPbI3                       | one-step | spin     | diethyl ether    | DMF+DMSO    | spiro-OMeTAD | Li+TBP       | 14.8 |
| Son, D.-Y. et al., J. Am. Chem. Soc. 140, jacs.7b10430 (2018)                             | 2018 | TiO2 | mTiO2 | FA0.85MA0.1Cs0.05PbI2.7Br0.3 | one-step | spin     | diethyl ether    | DMF+DMSO    | spiro-OMeTAD | Li+TBP       | 18.6 |
| Son, D.-Y. et al., J. Am. Chem. Soc. 140, jacs.7b10430 (2018)                             | 2018 | TiO2 | mTiO2 | FA0.85MA0.15PbI2.55Br0.45    | one-step | spin     | diethyl ether    | DMF+DMSO    | spiro-OMeTAD | Li+TBP       | 17.8 |
| Son, D.-Y. et al., J. Am. Chem. Soc. 140, jacs.7b10430 (2018)                             | 2018 | TiO2 | mTiO2 | MAPbI3                       | one-step | spin     | diethyl ether    | DMF+DMSO+KI | spiro-OMeTAD | Li+TBP       | 17.2 |
| Son, D.-Y. et al., J. Am. Chem. Soc. 140, jacs.7b10430 (2018)                             | 2018 | TiO2 | mTiO2 | FAPbI3                       | one-step | spin     | diethyl ether    | DMF+DMSO+KI | spiro-OMeTAD | Li+TBP       | 10.7 |
| Son, D.-Y. et al., J. Am. Chem. Soc. 140, jacs.7b10430 (2018)                             | 2018 | TiO2 | mTiO2 | FA0.85MA0.1Cs0.05PbI2.7Br0.3 | one-step | spin     | diethyl ether    | DMF+DMSO+KI | spiro-OMeTAD | Li+TBP       | 18.8 |
| Son, D.-Y. et al., J. Am. Chem. Soc. 140, jacs.7b10430 (2018)                             | 2018 | TiO2 | mTiO2 | FA0.85MA0.15PbI2.55Br0.45    | one-step | spin     | diethyl ether    | DMF+DMSO+KI | spiro-OMeTAD | Li+TBP       | 17.9 |
| Sun, K. et al., ACS Appl. Energy Mater. aesaem.8b00160 (2018). doi:10.1021/acsaem.8b00160 | 2018 | TiO2 | 0     | MAPbI3                       | two-step | spin     | no               | DMF         | spiro-OMeTAD | Li+TBP       | 18.5 |

|                                                                                           |      |      |              |                             |          |          |               |          |              |               |      |
|-------------------------------------------------------------------------------------------|------|------|--------------|-----------------------------|----------|----------|---------------|----------|--------------|---------------|------|
| Sun, K. et al., ACS Appl. Energy Mater. acsaem.8b00160 (2018). doi:10.1021/acsaem.8b00160 | 2018 | TiO2 | 0            | MAPbI3                      | two-step | spin     | no            | DMF      | spiro-OMeTAD | Li+TBP        | 14.3 |
| Wang, Q., J. Phys. Chem. C 122, 4822–4827 (2018)                                          | 2018 | TiO2 | 0            | MAPbI2.85Br 0.15            | one-step | spin     | no            | DMF      | spiro-OMeTAD | Li+TBP        | 6.8  |
| Wang, Q., J. Phys. Chem. C 122, 4822–4827 (2018)                                          | 2018 | TiO2 | mTiO2        | MAPbI2.85Br 0.15            | one-step | spin     | no            | DMF      | spiro-OMeTAD | Li+TBP        | 6.5  |
| Wang, B. et al., Journal of Energy Chemistry 27, 736–741 (2017)                           | 2018 | TiO2 | mTiO2        | MAPbI3                      | one-step | spin     | ethylacetate  | DMF+DMSO | spiro-OMeTAD | no            | 16.6 |
| Xu, Z. et al., J. Mater. Chem. C 6, 4746–4752 (2018)                                      | 2018 | TiO2 | 0            | MAPbI3-xClx                 | one-step | spin     | no            | DMF      | spiro-OMeTAD | Li+TBP        | 13.4 |
| Xu, Z. et al., J. Mater. Chem. C 6, 4746–4752 (2018)                                      | 2018 | TiO2 | 0            | MAPbI3-xClx                 | one-step | spin     | no            | DMF      | spiro-OMeTAD | Li+TBP        | 15.7 |
| Ye, Q.-Q. et al., ACS Energy Lett. 3, 875–882 (2018)                                      | 2018 | TiO2 | 0            | MAPbI3                      | one-step | spin     | chlorobenzene | DMF      | spiro-OMeTAD | no            | 16.3 |
| Ye, Q.-Q. et al., ACS Energy Lett. 3, 875–882 (2018)                                      | 2018 | TiO2 | bis-PCBM-DMC | MAPbI3                      | one-step | spin     | chlorobenzene | DMF      | spiro-OMeTAD | no            | 20.1 |
| Ye, Q.-Q. et al., ACS Energy Lett. 3, 875–882 (2018)                                      | 2018 | TiO2 | bis-PCBM     | MAPbI3                      | one-step | spin     | chlorobenzene | DMF      | spiro-OMeTAD | no            | 17.8 |
| Zhang, M. et al., Sol. RRL 2, 1700213 (2018)                                              | 2018 | TiO2 | 0            | FAI, CsI, PbI2, MABr, PbBr2 | one-step | spin 2-3 | chlorobenzene | DMF+DMSO | spiro-OMeTAD | Li+TBP+FK 209 | 19.1 |

|                                                        |      |              |       |                                                  |          |          |                |          |              |                  |      |
|--------------------------------------------------------|------|--------------|-------|--------------------------------------------------|----------|----------|----------------|----------|--------------|------------------|------|
| Zhang, M. et al., Sol. RRL 2, 1700213<br>(2018)        | 2018 | TiO2         | 0     | FAI, CsI,<br>PbI2,<br>MABr,PbBr2                 | one-step | spin 2-3 | methoxybenzene | DMF+DMSO | spiro-OMeTAD | Li+TBP+FK<br>209 | 19.4 |
| Zhang, R. et al., Electrochim. Acta 265, 98–106 (2018) | 2018 | TiO2         | mTiO2 | MAPbI3                                           | one-step | spin     | diethyl ether  | DMF+DMSO | spiro-OMeTAD | Li+TBP           | 16.2 |
| Zhang, R. et al., Electrochim. Acta 265, 98–106 (2018) | 2018 | TiO2         | mTiO2 | CsI, FAI,<br>PbI2, MABr,<br>PbBr2                | one-step | spin 2-3 | chlorobenzene  | DMF+DMSO | spiro-OMeTAD | Li+TBP+FK<br>209 | 18.2 |
| Zhao, X. et al., Nano Lett. 18, 2442–2449<br>(2018)    | 2018 | SnO2         | 0     | FA0.75MA0.<br>15Cs0.1PbI2<br>.65Br0.35           | one-step | spin     | chlorobenzene  | DMF+DMSO | spiro-OMeTAD | Li+TBP           | 20.2 |
| Zhao, X. et al., Nano Lett. 18, 2442–2449<br>(2018)    | 2018 | SnO2         | 0     | FA0.75MA0.<br>15Cs0.1PbI2<br>.65Br0.35           | one-step | spin     | chlorobenzene  | DMF+DMSO | spiro-OMeTAD | Li+TBP           | 19   |
| Zhao, X. et al., Nano Lett. 18, 2442–2449<br>(2018)    | 2018 | SnO2         | 0     | FA0.75MA0.<br>15Cs0.1PbI2<br>.65Br0.35           | one-step | spin     | chlorobenzene  | DMF+DMSO | spiro-OMeTAD | Li+TBP           | 18.8 |
| Zhao, X. et al., Nano Lett. 18, 2442–2449<br>(2018)    | 2018 | SnO2         | 0     | FA0.83MA0.<br>17PbI2.63Br<br>0.37                | one-step | spin     | chlorobenzene  | DMF+DMSO | spiro-OMeTAD | Li+TBP           | 15.2 |
| Zhao, X. et al., Nano Lett. 18, 2442–2449<br>(2018)    | 2018 | NDI-graphene | 0     | FA0.83MA0.<br>17PbI2.63Br<br>0.37                | one-step | spin     | chlorobenzene  | DMF+DMSO | spiro-OMeTAD | Li+TBP           | 9.8  |
| Zhao, Y. et al., Nat. Commun. 9, 1607<br>(2018)        | 2018 | TiO2         | 0     | Cs10<br>(Cs0.1FA0.7<br>8MA0.12PbI<br>2.55Br0.45) | two-step | spin     | no             | DMF+DMSO | spiro-OMeTAD | Li+TBP           | 21.7 |

|                                                                                                                                                                                          |      |      |    |                        |          |      |               |                     |              |                  |       |
|------------------------------------------------------------------------------------------------------------------------------------------------------------------------------------------|------|------|----|------------------------|----------|------|---------------|---------------------|--------------|------------------|-------|
| Ng, C. H. et al., Sci. Rep. 8, 2482 (2018)                                                                                                                                               | 2018 | TiO2 | 0  | PbI2/FAI/MA<br>Br/MACl | two-step | spin | no            | DMF+DMSO            | spiro-OMeTAD | Li+TBP           | 19.4  |
| Zhu, W. et al., Dalt. Trans. 47, 6404–<br>6411 (2018)                                                                                                                                    | 2018 | TiO2 | 0  | MAPbI3                 | one-step | spin | diethyl ether | DMF+DMSO            | spiro-OMeTAD | Li+TBP+FK<br>209 | 17.9  |
| Thermodynamically stabilized b-CsPbI3–<br>based perovskite solar cells with efficiencies<br>>18%                                                                                         | 2019 | TiO2 | no | CsPbI3                 | one-step | spin | no            | DMF                 | spiro-OMeTAD | no               | 18.4  |
| Surface passivation of perovskite film for<br>efficient solar cells                                                                                                                      | 2019 | SnO2 | no | FA-MA                  | two-step | spin | no            | DMF+DMSO<br>+others | spiro-OMeTAD | Li+TBP           | 23.32 |
| Perovskite-polymer composite cross-linker<br>approach for highly-stable and efficient<br>perovskite solar cells<br>approach for highly-stable and efficient<br>perovskite<br>solar cells | 2019 | SnO2 | no | MAPbI3                 | one-step | spin | diethyl ether | DMF+DMSO            | spiro-OMeTAD | Li+TBP           | 16.97 |
| Perovskite-polymer composite cross-linker<br>approach for highly-stable and efficient<br>perovskite solar cells<br>approach for highly-stable and efficient<br>perovskite<br>solar cells | 2019 | SnO2 | no | MAPbI3                 | one-step | spin | diethyl ether | DMF+DMSO            | spiro-OMeTAD | Li+TBP           | 18.65 |
| Perovskite-polymer composite cross-linker<br>approach for highly-stable and efficient<br>perovskite solar cells<br>approach for highly-stable and efficient<br>perovskite                | 2019 | SnO2 | no | MAPbI3                 | one-step | spin | diethyl ether | DMF+DMSO            | spiro-OMeTAD | Li+TBP           | 19.09 |

|                                                                                                                                                                              |      |      |      |          |          |      |               |          |              |                  |       |  |
|------------------------------------------------------------------------------------------------------------------------------------------------------------------------------|------|------|------|----------|----------|------|---------------|----------|--------------|------------------|-------|--|
| solar cells                                                                                                                                                                  |      |      |      |          |          |      |               |          |              |                  |       |  |
| Perovskite-polymer composite cross-linker approach for highly-stable and efficient perovskite solar cells<br>approach for highly-stable and efficient perovskite solar cells | 2019 | SnO2 | no   | MAPbI3   | one-step | spin | diethyl ether | DMF+DMSO | spiro-OMeTAD | Li+TBP           | 19.35 |  |
| Single-Crystal MAPbI3 Perovskite Solar Cells Exceeding 21% Power Conversion Efficiency                                                                                       | 2019 | PTAA | C60  | MAPbI3   | one-step | spin | no            | no       | PTAA         | no               | 21.09 |  |
| Efficient, stable and scalable perovskite solar cells using poly(3-hexylthiophene)                                                                                           | 2019 | TiO2 | TiO2 | FA-MA    | one-step | spin | diethyl ether | DMF+DMSO | P3HT         | no               | 22.67 |  |
| Planar p-n homojunction perovskite solar cells with efficiency exceeding 21.3%                                                                                               | 2019 | TiO2 | no   | MAPbI3   | one-step | spin | diethyl ether | DMF+DMSO | spiro-OMeTAD | Li+TBP           | 20.27 |  |
| Planar p-n homojunction perovskite solar cells with efficiency exceeding 21.3%                                                                                               | 2019 | TiO2 | no   | FA-MA    | one-step | spin | diethyl ether | DMF+DMSO | spiro-OMeTAD | Li+TBP           | 21.23 |  |
| Performance of perovskite solar cells under simulated temperature-illumination real-world operating conditions                                                               | 2019 | TiO2 | no   | Cs-FA-MA | one-step | spin | chlorobenzene | DMF+DMSO | spiro-OMeTAD | Li+TBP+FK<br>209 | 19.5  |  |
| Ultrahydrophobic 3D/2D fluoroarene bilayer-based water-resistant perovskite solar cells with efficiencies exceeding 22%                                                      | 2019 | TiO2 | TiO2 | others   | one-step | spin | chlorobenzene | DMF+DMSO | spiro-OMeTAD | Li+TBP+FK<br>209 | 19.74 |  |
| Methylammonium Chloride Induces Intermediate Phase Stabilization for Efficient Perovskite Solar Cells                                                                        | 2019 | TiO2 | TiO2 | FA-MA    | one-step | spin | diethyl ether | DMF+DMSO | spiro-OMeTAD | Li+TBP+TF<br>SI  | 24.02 |  |

|                                                                                                                             |      |      |        |          |          |      |               |            |              |               |       |
|-----------------------------------------------------------------------------------------------------------------------------|------|------|--------|----------|----------|------|---------------|------------|--------------|---------------|-------|
| Strain engineering in perovskite solar cells and its impacts on carrier dynamics                                            | 2019 | SnO2 | no     | Cs-FA-MA | one-step | spin | toluene       | DMF+DMSO   | spiro-OMeTAD | Li+TBP+TF SI  | 20.7  |
| Temperature Impact on Perovskite Solar Cells Under Operation                                                                | 2019 | TiO2 | no     | Cs-FA-MA | one-step | spin | chlorobenzene | DMF+DMSO   | spiro-OMeTAD | Li+TBP+FK 209 | 11.4  |
| Impedance analysis of perovskite solar cells: a case study                                                                  | 2019 | TiO2 | TiO2   | MAPbI3   | one-step | spin | diethyl ether | DMF+DMSO   | spiro-OMeTAD | Li+TBP+TF SI  | 16.25 |
| Impedance analysis of perovskite solar cells: a case study                                                                  | 2019 | TiO2 | TiO2   | CsPbI3   | two-step | spin | no            | DMF+others | spiro-OMeTAD | Li+TBP        | 4.5   |
| Record Open-Circuit Voltage Wide-Bandgap Perovskite Solar Cells Utilizing 2D/3D Perovskite Heterostructure                  | 2019 | SnO2 | no     | Cs-FA-MA | two-step | spin | chlorobenzene | DMF+DMSO   | spiro-OMeTAD | Li+TBP        | 19.4  |
| Structurally Reconstructed CsPbI2Br Perovskite for Highly Stable and Square-Centimeter All-Inorganic Perovskite Solar Cells | 2019 | ZnO  | C60    | CsPbI3   | two-step | spin | no            | DMSO       | others       | no            | 10.4  |
| CsPbBr3 perovskite nanoparticles as additive for environmentally stable perovskite solar cells with 20.46% efficiency       | 2019 | TiO2 | TiO2   | MAPbI3   | one-step | spin | chlorobenzene | DMF+DMSO   | spiro-OMeTAD | Li+TBP        | 20.46 |
| Precise Control of Crystal Growth for Highly Efficient CsPbI2Br Perovskite Solar Cells                                      | 2019 | TiO2 | no     | CsPbI3   | one-step | spin | IPA           | DMSO       | spiro-OMeTAD | Li+TBP        | 15.75 |
| Dual Interfacial Design for Efficient CsPbI2Br Perovskite Solar Cells with Improved Photostability                          | 2019 | SnO2 | others | CsPbI3   | two-step | spin | no            | DMF+DMSO   | others       | no            | 16.2  |
| Dual Interfacial Design for Efficient CsPbI2Br Perovskite Solar Cells with Improved                                         | 2019 | SnO2 | others | CsPbI3   | two-step | spin | no            | DMF+DMSO   | spiro-OMeTAD | Li+TBP+FK 209 | 15.1  |



|                                                                                                                 |      |                  |    |                    |          |      |         |                     |              |                  |      |
|-----------------------------------------------------------------------------------------------------------------|------|------------------|----|--------------------|----------|------|---------|---------------------|--------------|------------------|------|
| Photostability                                                                                                  |      |                  |    |                    |          |      |         |                     |              |                  |      |
| Dual Interfacial Design for Efficient CsPbI <sub>2</sub> Br Perovskite Solar Cells with Improved Photostability | 2019 | SnO <sub>2</sub> | no | CsPbI <sub>3</sub> | two-step | spin | no      | DMF+DMSO            | others       | no               | 13   |
| Dual Interfacial Design for Efficient CsPbI <sub>2</sub> Br Perovskite Solar Cells with Improved Photostability | 2019 | SnO <sub>2</sub> | no | CsPbI <sub>3</sub> | two-step | spin | no      | DMF+DMSO            | spiro-OMeTAD | Li+TBP+FK<br>209 | 12.3 |
| Planar perovskite solar cells with long-term stability using ionic liquid additives                             | 2019 | NiOx             | no | Cs-FA-MA           | one-step | spin | anisole | others              | PCBM         | others           | 19.8 |
| Planar perovskite solar cells with long-term stability using ionic liquid additives                             | 2019 | NiOx             | no | Cs-FA-MA           | one-step | spin | anisole | DMF+DMSO<br>+others | PCBM         | others           | 18.5 |
| Role of Gel2 and SnF <sub>2</sub> additives for SnGe perovskite solar cells                                     | 2019 | PCBM             | no | Cs-FA-MA           | one-step | spin | no      | DMF+DMSO            | PEDOT:PSS    | others           | 7.9  |
| Highly Efficient Semitransparent Perovskite Solar Cells for Four Terminal Perovskite-Silicon Tandems            | 2019 | SnO <sub>2</sub> | no | Cs-FA              | one-step | spin | no      | DMSO                | spiro-OMeTAD | Li+TBP+FK<br>209 | 17.2 |
| Highly Efficient Semitransparent Perovskite Solar Cells for Four Terminal Perovskite-Silicon Tandems            | 2019 | TiO <sub>2</sub> | no | Cs-FA-MA           | one-step | spin | no      | no                  | spiro-OMeTAD | Li+TBP+FK<br>209 | 16.8 |
| Highly Efficient Semitransparent Perovskite Solar Cells for Four Terminal Perovskite-Silicon Tandems            | 2019 | SnO <sub>2</sub> | no | Cs-FA-MA           | one-step | spin | no      | DMSO                | spiro-OMeTAD | Li+TBP+FK<br>209 | 13.7 |
| Highly Efficient Semitransparent Perovskite Solar Cells for Four Terminal Perovskite-Silicon Tandems            | 2019 | TiO <sub>2</sub> | no | Cs-FA              | one-step | spin | no      | no                  | spiro-OMeTAD | Li+TBP+FK<br>209 | 14.3 |

|                                                                                                          |      |           |      |        |          |        |               |          |              |        |      |
|----------------------------------------------------------------------------------------------------------|------|-----------|------|--------|----------|--------|---------------|----------|--------------|--------|------|
| Highly Stable and Efficient FASnI3-Based Perovskite Solar Cells by Introducing Hydrogen Bonding          | 2019 | BCP       | C60  | FASnI3 | one-step | spin   | chlorobenzene | DMSO     | PEDOT:PSS    | no     | 6.4  |
| Highly Stable and Efficient FASnI3-Based Perovskite Solar Cells by Introducing Hydrogen Bonding          | 2019 | BCP       | C60  | FASnI3 | one-step | spin   | chlorobenzene | DMSO     | PEDOT:PSS    | no     | 6.4  |
| Self-Assembled 2D Perovskite Layers for Efficient Printable Solar Cells                                  | 2019 | PEDOT:PSS | no   | others | one-step | others | no            | DMF      | PCBM         | others | 14.5 |
| Self-Assembled 2D Perovskite Layers for Efficient Printable Solar Cells                                  | 2019 | PEDOT:PSS | no   | others | one-step | others | no            | DMF      | PCBM         | others | 12.5 |
| Self-Assembled 2D Perovskite Layers for Efficient Printable Solar Cells                                  | 2019 | PEDOT:PSS | no   | others | one-step | others | no            | DMF      | PCBM         | others | 8    |
| Pb-Reduced CsPb0.9Zn0.1I2Br Thin Films for Efficient Perovskite Solar Cells                              | 2019 | c-TiO2    | no   | CsPbI3 | one-step | spin   | no            | DMF+DMSO | spiro-OMeTAD | Li+TBP | 13.6 |
| Pb-Reduced CsPb0.9Zn0.1I2Br Thin Films for Efficient Perovskite Solar Cells                              | 2019 | c-TiO2    | no   | CsPbI3 | one-step | spin   | no            | DMF+DMSO | spiro-OMeTAD | Li+TBP | 11.8 |
| Robust Tin-based Perovskite Solar cells with Hybrid Organic Cations to Attain Efficiency Approaching 10% | 2019 | BCP       | C60  | FASnI3 | one-step | spin   | chlorobenzene | DMSO     | PEDOT:PSS    | no     | 7.4  |
| Cation influence on carrier dynamics in perovskite solar cells                                           | 2019 | TiO2      | TiO2 | FA-MA  | one-step | spin   | chlorobenzene | DMF+DMSO | spiro-OMeTAD | Li+TBP | 16.5 |
| Cation influence on carrier dynamics in perovskite solar cells                                           | 2019 | TiO2      | TiO2 | FA-MA  | one-step | spin   | chlorobenzene | DMF+DMSO | spiro-OMeTAD | Li+TBP | 17.1 |

|                                                                                                                          |      |        |      |          |          |           |               |          |              |        |       |
|--------------------------------------------------------------------------------------------------------------------------|------|--------|------|----------|----------|-----------|---------------|----------|--------------|--------|-------|
| Cation influence on carrier dynamics in perovskite solar cells                                                           | 2019 | TiO2   | TiO2 | Cs-FA-MA | one-step | spin      | chlorobenzene | DMF+DMSO | spiro-OMeTAD | Li+TBP | 17.9  |
| Cation influence on carrier dynamics in perovskite solar cells                                                           | 2019 | TiO2   | TiO2 | Cs-FA-MA | one-step | spin      | chlorobenzene | DMF+DMSO | spiro-OMeTAD | Li+TBP | 19.1  |
| Bilateral alkylamine for suppressing charge recombination and improving stability in blade-coated perovskite solar cells | 2019 | TiO2   | TiO2 | Cs-FA-MA | one-step | spin-drip | no            | DMF      | PTAA         | no     | 15.02 |
| Bilateral alkylamine for suppressing charge recombination and improving stability in blade-coated perovskite solar cells | 2019 | BCP    | C60  | Cs-FA-MA | one-step | spin-drip | no            | DMF      | PTAA         | no     | 20.36 |
| Bilateral alkylamine for suppressing charge recombination and improving stability in blade-coated perovskite solar cells | 2019 | BCP    | C60  | MAPbI3   | one-step | spin-drip | no            | DMF      | PTAA         | no     | 16.45 |
| Bilateral alkylamine for suppressing charge recombination and improving stability in blade-coated perovskite solar cells | 2019 | BCP    | C60  | MAPbI3   | one-step | spin-drip | no            | DMF      | PTAA         | no     | 20.53 |
| Bilateral alkylamine for suppressing charge recombination and improving stability in blade-coated perovskite solar cells | 2019 | BCP    | C60  | Cs-FA    | one-step | spin-drip | no            | DMF      | PTAA         | no     | 11.78 |
| Bilateral alkylamine for suppressing charge recombination and improving stability in blade-coated perovskite solar cells | 2019 | BCP    | C60  | Cs-FA    | one-step | spin-drip | no            | DMF      | PTAA         | no     | 13.87 |
| Targeted Therapy for Interfacial Engineering Toward Stable and Efficient Perovskite Solar Cells                          | 2019 | others | PCBM | MAPbI3   | one-step | spin      | chlorobenzene | DMF+DMSO | PTAA         | no     | 21.8  |

|                                                                                                                                   |      |                  |                  |                    |          |        |               |          |              |        |       |
|-----------------------------------------------------------------------------------------------------------------------------------|------|------------------|------------------|--------------------|----------|--------|---------------|----------|--------------|--------|-------|
| Targeted Therapy for Interfacial Engineering Toward Stable and Efficient Perovskite Solar Cells                                   | 2019 | others           | no               | MAPbI <sub>3</sub> | one-step | spin   | chlorobenzene | DMF+DMSO | PTAA         | no     | 18.61 |
| Caffeine Improves the Performance and Thermal Stability of Perovskite Solar Cells                                                 | 2019 | SnO <sub>2</sub> | no               | MAPbI <sub>3</sub> | one-step | spin   | diethyl ether | DMF+DMSO | PTAA         | no     | 16.92 |
| Caffeine Improves the Performance and Thermal Stability of Perovskite Solar Cells                                                 | 2019 | SnO <sub>2</sub> | no               | MAPbI <sub>3</sub> | one-step | spin   | diethyl ether | DMF+DMSO | PTAA         | no     | 17.74 |
| Caffeine Improves the Performance and Thermal Stability of Perovskite Solar Cells                                                 | 2019 | SnO <sub>2</sub> | no               | MAPbI <sub>3</sub> | one-step | spin   | diethyl ether | DMF+DMSO | PTAA         | no     | 19.87 |
| Caffeine Improves the Performance and Thermal Stability of Perovskite Solar Cells                                                 | 2019 | SnO <sub>2</sub> | no               | MAPbI <sub>3</sub> | one-step | spin   | diethyl ether | DMF+DMSO | PTAA         | no     | 18.4  |
| Self-Seeding Growth for Perovskite Solar Cells with Enhanced Stability                                                            | 2019 | TiO <sub>2</sub> | no               | Cs-FA-MA           | one-step | spin   | chlorobenzene | DMF+DMSO | spiro-OMeTAD | Li+TBP | 17.76 |
| Controlling competing photochemical reactions stabilizes perovskite solar cells                                                   | 2019 | SnO <sub>2</sub> | C60              | MAPbI <sub>3</sub> | one-step | spin   | toluene       | DMF+DMSO | spiro-OMeTAD | Li+TBP | 15.05 |
| Highly Efficient and Stable Perovskite Solar Cells via Modification of Energy Levels at the Perovskite/Carbon Electrode Interface | 2019 | TiO <sub>2</sub> | TiO <sub>2</sub> | Cs-FA              | one-step | spin   | IPA           | DMF+DMSO | Without HTL  | no     | 10.1  |
| Rapid Crystallization for Efficient 2D Ruddlesden–Popper (2DRP) Perovskite Solar Cells                                            | 2019 | PEDOT:PSS        | no               | MAPbI <sub>3</sub> | one-step | others | no            | DMF      | PCBM         | others | 7.33  |
| Rapid Crystallization for Efficient 2D Ruddlesden–Popper (2DRP) Perovskite Solar Cells                                            | 2019 | PEDOT:PSS        | no               | MAPbI <sub>3</sub> | one-step | others | no            | DMSO     | PCBM         | others | 8.13  |

|                                                                                                                                    |      |                  |    |                       |          |        |               |          |              |                  |       |
|------------------------------------------------------------------------------------------------------------------------------------|------|------------------|----|-----------------------|----------|--------|---------------|----------|--------------|------------------|-------|
| Rapid Crystallization for Efficient 2D Ruddlesden–Popper (2DRP) Perovskite Solar Cells                                             | 2019 | PEDOT:PSS        | no | MAPbI <sub>3</sub>    | one-step | others | no            | DMAC     | PCBM         | others           | 12.15 |
| Unveiling the operation mechanism of layered perovskite solar cells                                                                | 2019 | PCBM             | no | MAPbI <sub>3</sub>    | one-step | spin   | no            | DMF      | PTAA         | no               | 12.7  |
| Impacts of alkaline on the defects property and crystallization kinetics in perovskite solar cells                                 | 2019 | SnO <sub>2</sub> | no | Cs-FA-MA              | two-step | spin   | no            | DMF+DMSO | spiro-OMeTAD | Li+TBP           | 21.01 |
| Impacts of alkaline on the defects property and crystallization kinetics in perovskite solar cells                                 | 2019 | SnO <sub>2</sub> | no | Cs-FA-MA              | two-step | spin   | no            | DMF+DMSO | spiro-OMeTAD | Li+TBP           | 19.97 |
| Mechanism of PbI <sub>2</sub> In Situ Passivated Perovskite Films for Enhancing Performance of Perovskite Solar Cells              | 2019 | SnO <sub>2</sub> | no | FA-MA                 | one-step | spin   | IPA           | DMF+DMSO | spiro-OMeTAD | Li+TBP           | 17.61 |
| Mixed-cation perovskite solar cells in space                                                                                       | 2019 | TiO <sub>2</sub> | no | Cs-FA                 | one-step | spin   | chlorobenzene | DMF+DMSO | spiro-OMeTAD | Li+TBP           | 6.41  |
| Mixed-cation perovskite solar cells in space                                                                                       | 2019 | TiO <sub>2</sub> | no | Cs-FA-MA              | one-step | spin   | chlorobenzene | DMF+DMSO | spiro-OMeTAD | Li+TBP           | 6.28  |
| Interface-Modification-Induced Gradient Energy Band for Highly Efficient CsPbI <sub>2</sub> Br <sub>2</sub> Perovskite Solar Cells | 2019 | TiO <sub>2</sub> | no | CsPbI <sub>2</sub> Br | one-step | spin   | no            | DMSO     | spiro-OMeTAD | Li+TBP           | 8.37  |
| Mechanism of PbI <sub>2</sub> In Situ Passivated Perovskite Films for Enhancing Performance of Perovskite Solar Cells              | 2019 | SnO <sub>2</sub> | no | FA-MA                 | two-step | spin   | IPA           | DMF+DMSO | spiro-OMeTAD | Li+TBP           | 17.61 |
| Perovskite Cluster-Containing Solution for Scalable D-Bar Coating toward                                                           | 2019 | SnO <sub>2</sub> | no | MAPbI <sub>3</sub>    | one-step | others | no            | DMF+DMSO | spiro-OMeTAD | Li+TBP+FK<br>209 | 17.01 |

|                                                                                                                                               |      |      |      |        |          |      |               |          |              |                  |       |
|-----------------------------------------------------------------------------------------------------------------------------------------------|------|------|------|--------|----------|------|---------------|----------|--------------|------------------|-------|
| HighThroughput Perovskite Solar Cells                                                                                                         |      |      |      |        |          |      |               |          |              |                  |       |
| Europium-Doped CsPbI2Br for Stable and Highly Efficient Inorganic Perovskite Solar Cells                                                      | 2019 | TiO2 | TiO2 | CsPbI3 | one-step | spin | no            | DMSO     | spiro-OMeTAD | Li+TBP+FK<br>209 | 10.21 |
| Europium-Doped CsPbI2Br for Stable and Highly Efficient Inorganic Perovskite Solar Cells                                                      | 2019 | TiO2 | TiO2 | CsPbI3 | one-step | spin | no            | DMF+DMSO | spiro-OMeTAD | Li+TBP+FK<br>209 | 12.37 |
| Europium-Doped CsPbI2Br for Stable and Highly Efficient Inorganic Perovskite Solar Cells                                                      | 2019 | TiO2 | TiO2 | CsPbI3 | one-step | spin | no            | DMF+DMSO | spiro-OMeTAD | Li+TBP+FK<br>209 | 13.18 |
| Europium-Doped CsPbI2Br for Stable and Highly Efficient Inorganic Perovskite Solar Cells                                                      | 2019 | TiO2 | TiO2 | CsPbI3 | one-step | spin | no            | DMF+DMSO | spiro-OMeTAD | Li+TBP+FK<br>209 | 13.71 |
| Europium-Doped CsPbI2Br for Stable and Highly Efficient Inorganic Perovskite Solar Cells                                                      | 2019 | TiO2 | TiO2 | CsPbI3 | one-step | spin | no            | DMF+DMSO | spiro-OMeTAD | Li+TBP+FK<br>209 | 12.45 |
| Europium-Doped CsPbI2Br for Stable and Highly Efficient Inorganic Perovskite Solar Cells                                                      | 2019 | TiO2 | TiO2 | CsPbI3 | one-step | spin | no            | DMF+DMSO | spiro-OMeTAD | Li+TBP+FK<br>209 | 10.97 |
| Controllable Perovskite Crystallization via Antisolvent Technique Using Chloride Additives for Highly Efficient Planar Perovskite Solar Cells | 2019 | SnO2 | no   | FA-MA  | one-step | spin | chlorobenzene | DMF+DMSO | spiro-OMeTAD | Li+TBP+FK<br>209 | 19.7  |
| Controllable Perovskite Crystallization via Antisolvent Technique Using Chloride Additives for Highly Efficient Planar Perovskite             | 2019 | SnO2 | no   | FA-MA  | one-step | spin | chlorobenzene | DMF+DMSO | spiro-OMeTAD | Li+TBP+FK<br>209 | 18.65 |

|                                                                                                                    |      |      |      |          |          |      |               |          |              |        |        |
|--------------------------------------------------------------------------------------------------------------------|------|------|------|----------|----------|------|---------------|----------|--------------|--------|--------|
| Solar Cells                                                                                                        |      |      |      |          |          |      |               |          |              |        |        |
| Quantifying the Interface Defect for the Stability Origin of Perovskite Solar Cells                                | 2019 | TiO2 | no   | MAPbI3   | one-step | spin | chlorobenzene | DMF+DMSO | spiro-OMeTAD | no     | 17.9   |
| Quantifying the Interface Defect for the Stability Origin of Perovskite Solar Cells                                | 2019 | TiO2 | PCBA | MAPbI3   | one-step | spin | chlorobenzene | DMF+DMSO | spiro-OMeTAD | no     | 20.1   |
| Quantifying the Interface Defect for the Stability Origin of Perovskite Solar Cells                                | 2019 | no   | no   | MAPbI3   | one-step | spin | chlorobenzene | DMF+DMSO | spiro-OMeTAD | no     | 13.2   |
| Quantifying the Interface Defect for the Stability Origin of Perovskite Solar Cells                                | 2019 | TiO2 | no   | MAPbI3   | one-step | spin | chlorobenzene | DMF+DMSO | Without HTL  | no     | 3.2    |
| Quantifying the Interface Defect for the Stability Origin of Perovskite Solar Cells                                | 2019 | TiO2 | no   | MAPbI3   | one-step | spin | chlorobenzene | DMF+DMSO | Without HTL  | no     | 7.4    |
| Tailoring Passivation Molecular Structures for Extremely Small Open-Circuit Voltage Loss in Perovskite Solar Cells | 2019 | BCP  | C60  | Cs-FA-MA | one-step | spin | no            | DMF+DMSO | PTAA         | no     | 21.4   |
| High-Performance Flexible Perovskite Solar Cells via Precise Control of Electron Transport Layer                   | 2019 | SnO2 | no   | Cs-FA-MA | two-step | spin | no            | DMF+DMSO | spiro-OMeTAD | Li+TBP | 19.5   |
| Interfacial Residual Stress Relaxation in Perovskite Solar Cells with Improved Stability                           | 2019 | SnO2 | no   | FA-MA    | one-step | spin | no            | DMF+DMSO | spiro-OMeTAD | Li+TBP | 20.406 |
| Efficient and Stable Inverted Perovskite Solar Cells Incorporating Secondary Amines                                | 2019 | BCP  | C60  | MAPbI3   | one-step | spin | toluene       | DMF+DMSO | others       | no     | 18.2   |
| Efficient and Stable Inverted Perovskite Solar Cells Incorporating Secondary Amines                                | 2019 | BCP  | C60  | FA-MA    | one-step | spin | toluene       | DMF+DMSO | others       | no     | 18.6   |

|                                                                                                              |      |           |      |          |          |      |               |          |              |        |       |
|--------------------------------------------------------------------------------------------------------------|------|-----------|------|----------|----------|------|---------------|----------|--------------|--------|-------|
| Efficient and Stable Inverted Perovskite Solar Cells Incorporating Secondary Amines                          | 2019 | BCP       | C60  | FA-MA    | one-step | spin | toluene       | DMF+DMSO | others       | no     | 20.9  |
| Efficient and Stable Inverted Perovskite Solar Cells Incorporating Secondary Amines                          | 2019 | BCP       | C60  | FA-MA    | one-step | spin | toluene       | DMF+DMSO | others       | no     | 21.2  |
| Efficient and Stable Inverted Perovskite Solar Cells Incorporating Secondary Amines                          | 2019 | BCP       | C60  | FA-MA    | one-step | spin | toluene       | DMF+DMSO | others       | no     | 21.6  |
| Efficient and Stable Inverted Perovskite Solar Cells Incorporating Secondary Amines                          | 2019 | BCP       | C60  | FA-MA    | one-step | spin | toluene       | DMF+DMSO | others       | no     | 19.7  |
| A new polytriarylamine derivative for dopant-free high-efficiency perovskite solar cells                     | 2019 | SnO2      | PCBM | MAPbI3   | one-step | spin | no            | DMF+DMSO | PTAA         | no     | 17    |
| A new polytriarylamine derivative for dopant-free high-efficiency perovskite solar cells                     | 2019 | SnO2      | PCBM | Cs-FA    | one-step | spin | no            | DMF+DMSO | PTAA         | no     | 16    |
| Efficient perovskite solar cells by hybrid perovskites incorporated with heterovalent neodymium cations      | 2019 | PEDOT:PSS | no   | MAPbI3   | two-step | spin | no            | DMF+DMSO | PC61BM       | no     | 17.12 |
| Energy Alignment and Recombination in Perovskite Solar Cells: Weighted Influence on the Open Circuit Voltage | 2019 | TiO2      | no   | Cs-FA-MA | one-step | spin | chlorobenzene | DMF+DMSO | spiro-OMeTAD | Li+TBP | 18.4  |
| Energy Alignment and Recombination in Perovskite Solar Cells: Weighted Influence on the Open Circuit Voltage | 2019 | TiO2      | no   | Cs-FA-MA | one-step | spin | chlorobenzene | DMF+DMSO | others       | Li+TBP | 14.3  |
| Energy Alignment and Recombination in Perovskite Solar Cells: Weighted Influence on the Open Circuit Voltage | 2019 | TiO2      | no   | Cs-FA-MA | one-step | spin | chlorobenzene | DMF+DMSO | others       | Li+TBP | 15.3  |



|                                                                                                                                    |      |      |      |          |          |      |               |          |              |        |       |
|------------------------------------------------------------------------------------------------------------------------------------|------|------|------|----------|----------|------|---------------|----------|--------------|--------|-------|
| Energy Alignment and Recombination in Perovskite Solar Cells: Weighted Influence on the Open Circuit Voltage                       | 2019 | TiO2 | no   | Cs-FA-MA | one-step | spin | chlorobenzene | DMF+DMSO | others       | Li+TBP | 16.5  |
| Solution-Phase Epitaxial Growth of Perovskite Films on 2D Material Flakes for High-Performance Solar Cells                         | 2019 | PCBM | no   | MAPbI3   | one-step | spin | diethyl ether | DMF+DMSO | PTAA         | no     | 17.55 |
| Pb-Reduced CsPb0.9Zn0.1I2Br Thin Films for Efficient Perovskite Solar Cells                                                        | 2019 | TiO2 | no   | CsPbI3   | one-step | spin | no            | DMF+DMSO | spiro-OMeTAD | Li+TBP | 13.6  |
| Atomic-level passivation mechanism of ammonium salts enabling highly efficient perovskite solar cells                              | 2019 | TiO2 | no   | Cs-FA-MA | one-step | spin | chlorobenzene | DMF+DMSO | spiro-OMeTAD | Li+TBP | 20.5  |
| Ultrahigh Durability Perovskite Solar Cells                                                                                        | 2019 | TiO2 | TiO2 | MAPbI3   | one-step | spin | toluene       | DMSO+GBL | spiro-OMeTAD | no     | 18.7  |
| Dion-Jacobson Two-Dimensional Perovskite Solar Cells Based on Benzene Dimethan ammonium Cation                                     | 2019 | TiO2 | TiO2 | others   | one-step | spin | chlorobenzene | DMF+DMSO | spiro-OMeTAD | Li+TBP | 15.6  |
| A Novel Anion Doping for Stable CsPbI2Br Perovskite Solar Cells with an Efficiency of 15.56% and an Open Circuit Voltage of 1.30 V | 2019 | TiO2 | no   | CsPbI3   | two-step | spin | no            | DMF+DMSO | spiro-OMeTAD | Li+TBP | 15.56 |
| Highly stable semi-transparent MAPbI3 perovskite solar cells with operational output for 4000 h                                    | 2019 | PCBM | no   | MAPbI3   | two-step | spin | no            | DMF      | PTAA         | no     | 12.5  |
| Interfacial Engineering at the 2D/3D Heterojunction for HighPerformance Perovskite Solar Cells                                     | 2019 | TiO2 | no   | FAPbI3   | one-step | spin | chlorobenzene | DMF+DMSO | spiro-OMeTAD | Li+TBP | 19.02 |

|                                                                                                                                    |      |      |      |            |          |      |               |          |              |        |       |
|------------------------------------------------------------------------------------------------------------------------------------|------|------|------|------------|----------|------|---------------|----------|--------------|--------|-------|
| Role of Gel2 and SnF2 additives for SnGe perovskite solar cells                                                                    | 2019 | PCBM | C60  | FA-MA      | one-step | spin | toluene       | DMF+DMSO | PEDOT:PSS    | no     | 7.9   |
| A Scalable Methylamine Gas Healing Strategy for High Efficiency Inorganic Perovskite Solar Cells                                   | 2019 | TiO2 | TiO2 | CsPbI3     | one-step | spin | no            | DMSO     | spiro-OMeTAD | Li+TBP | 13.1  |
| Consistent Device Simulation Model Describing Perovskite Solar Cells in Steady-State, Transient, and Frequency Domain              | 2019 | C60  | no   | MAPbI3     | one-step | SVD  | no            | no       | others       | no     | 10    |
| An optimized perovskite solar cell designs for high conversion efficiency                                                          | 2019 | TiO2 | no   | CH3NH3PbI3 | one-step | spin | no            | no       | spiro-OMeTAD | Li+TBP | 18.16 |
| An optimized perovskite solar cell designs for high conversion efficiency                                                          | 2019 | TiO2 | no   | CH3NH3SnI3 | one-step | spin | no            | no       | spiro-OMeTAD | Li+TBP | 9.56  |
| Origin of apparent light-enhanced and negative capacitance in perovskite solar cells                                               | 2019 | TiO2 | TiO2 | Cs-FA      | one-step | spin | chlorobenzene | DMF+DMSO | spiro-OMeTAD | Li+TBP | 19    |
| Reconfiguration of interfacial energy band structure for high-performance inverted structure perovskite solar cells                | 2019 | PCBM | C60  | MAPbI3     | one-step | spin | no            | DMF+DMSO | PTAA         | no     | 16.89 |
| Polymeric, Cost-Effective, Dopant-Free Hole Transport Materials for Efficient and Stable Perovskite Solar Cells                    | 2019 | SnO2 | no   | MAPbI3     | one-step | spin | no            | DMF+DMSO | spiro-OMeTAD | Li+TBP | 19.7  |
| Preparation of Tortuous 3D $\gamma$ -CsPbI3 Films at Low Temperature by CaI2 as Dopant for Highly Efficient Perovskite Solar Cells | 2019 | TiO2 | TiO2 | others     | one-step | spin | no            | DMSO     | spiro-OMeTAD | Li+TBP | 9.32  |
| Tailored Phase Transformation of CsPbI2Br Films by Copper (II) Bromide for HighPerformance All-Inorganic Perovskite                | 2019 | TiO2 | no   | CsPbI3     | one-step | spin | chlorobenzene | DMSO     | spiro-OMeTAD | Li+TBP | 13.24 |

|                                                                                                                              |      |                  |                  |                    |          |        |               |          |              |        |       |  |
|------------------------------------------------------------------------------------------------------------------------------|------|------------------|------------------|--------------------|----------|--------|---------------|----------|--------------|--------|-------|--|
| Solar Cells                                                                                                                  |      |                  |                  |                    |          |        |               |          |              |        |       |  |
| Pulsed Laser Deposition of CsPbBr <sub>3</sub> Films for Application in Perovskite Solar Cells                               | 2019 | TiO <sub>2</sub> | TiO <sub>2</sub> | CsPbI <sub>3</sub> | one-step | others | no            | no       | spiro-OMeTAD | Li+TBP | 6.3   |  |
| Fine Multi-Phase Alignments in 2D Perovskite Solar Cells with Efficiency over 17% via Slow Post-Annealing                    | 2019 | BCP              | C60              | MAPbI <sub>3</sub> | one-step | others | no            | DMF      | PTAA         | no     | 17.16 |  |
| Fine Multi-Phase Alignments in 2D Perovskite Solar Cells with Efficiency over 17% via Slow Post-Annealing                    | 2019 | BCP              | C60              | MAPbI <sub>3</sub> | one-step | others | no            | DMF      | PTAA         | no     | 15.6  |  |
| Polarized Ferroelectric Polymers for High-Performance Perovskite Solar Cells                                                 | 2019 | TiO <sub>2</sub> | no               | others             | one-step | spin   | chlorobenzene | DMSO     | spiro-OMeTAD | no     | 21.38 |  |
| Investigation of Oxygen Passivation for High-Performance Allinorganic Perovskite Solar Cells                                 | 2019 | SnO <sub>2</sub> | no               | CsPbI <sub>3</sub> | one-step | spin   | no            | DMSO     | spiro-OMeTAD | Li+TBP | 13    |  |
| LITFSI-Free spiro-OMeTAD-Based Perovskite Solar Cells with Power Conversion Efficiencies Exceeding 19%                       | 2019 | TiO <sub>2</sub> | TiO <sub>2</sub> | Cs-FA-MA           | one-step | spin   | chlorobenzene | DMF+DMSO | spiro-OMeTAD | Li+TBP | 17.5  |  |
| LITFSI-Free spiro-OMeTAD-Based Perovskite Solar Cells with Power Conversion Efficiencies Exceeding 19%                       | 2019 | TiO <sub>2</sub> | TiO <sub>2</sub> | Cs-FA-MA           | one-step | spin   | chlorobenzene | DMF+DMSO | spiro-OMeTAD | no     | 14.3  |  |
| Composition Stoichiometry of Cs <sub>2</sub> AgBiBr <sub>6</sub> Films for Highly Efficient Lead-Free Perovskite Solar Cells | 2019 | TiO <sub>2</sub> | no               | others             | one-step | spin   | no            | DMSO     | spiro-OMeTAD | Li+TBP | 2.48  |  |
| Influence of Cl Incorporation in Perovskite Precursor on the Crystal Growth and Storage                                      | 2019 | TiO <sub>2</sub> | no               | FA-MA              | one-step | spin   | no            | DMF      | spiro-OMeTAD | Li+TBP | 15.2  |  |

|                                                                                                                             |      |      |      |          |          |      |               |          |              |        |       |
|-----------------------------------------------------------------------------------------------------------------------------|------|------|------|----------|----------|------|---------------|----------|--------------|--------|-------|
| Stability of Perovskite Solar Cells                                                                                         |      |      |      |          |          |      |               |          |              |        |       |
| Influence of Cl Incorporation in Perovskite Precursor on the Crystal Growth and Storage Stability of Perovskite Solar Cells | 2019 | TiO2 | no   | FA-MA    | one-step | spin | no            | DMF      | spiro-OMeTAD | Li+TBP | 16.8  |
| Influence of Cl Incorporation in Perovskite Precursor on the Crystal Growth and Storage Stability of Perovskite Solar Cells | 2019 | TiO2 | no   | FA-MA    | one-step | spin | no            | DMF      | spiro-OMeTAD | Li+TBP | 19.1  |
| Influence of Cl Incorporation in Perovskite Precursor on the Crystal Growth and Storage Stability of Perovskite Solar Cells | 2019 | TiO2 | no   | FA-MA    | one-step | spin | no            | DMF      | spiro-OMeTAD | Li+TBP | 19.2  |
| Efficient and Stable FASnI3 Perovskite Solar Cells with Effective Interface Modulation by Low-Dimensional Perovskite Layer  | 2019 | PCBM | no   | FASnI3   | one-step | spin | no            | no       | PEDOT:PSS    | no     | 4.77  |
| Alkali Chlorides for the Suppression of the Interfacial Recombination in Inverted Planar Perovskite Solar Cells             | 2019 | NiOx | no   | Cs-FA-MA | one-step | spin | chlorobenzene | DMF+DMSO | PCBM         | no     | 16.67 |
| Highly Efficient and Stable Solar Cells Based on Crystalline Oriented 2D/3D Hybrid Perovskite                               | 2019 | SnO2 | no   | others   | two-step | spin | no            | DMF+DMSO | spiro-OMeTAD | Li+TBP | 21.1  |
| UV-Inert ZnTiO3 Electron Selective Layer for Photostable Perovskite Solar Cells                                             | 2019 | ZTO  | no   | Cs-FA-MA | one-step | spin | no            | DMF+DMSO | spiro-OMeTAD | Li+TBP | 19.8  |
| UV-Inert ZnTiO3 Electron Selective Layer for Photostable Perovskite Solar Cells                                             | 2019 | TiO2 | no   | Cs-FA-MA | one-step | spin | no            | DMF+DMSO | spiro-OMeTAD | Li+TBP | 17.6  |
| Chemical Composition and Phase Evolution in DMAI-Derived Inorganic Perovskite Solar                                         | 2019 | TiO2 | TiO2 | Cs-MA    | one-step | spin | no            | DMSO     | spiro-OMeTAD | Li+TBP | 14.4  |

|                                                                                                                               |      |      |      |          |          |      |               |          |              |        |       |  |
|-------------------------------------------------------------------------------------------------------------------------------|------|------|------|----------|----------|------|---------------|----------|--------------|--------|-------|--|
| Cells                                                                                                                         |      |      |      |          |          |      |               |          |              |        |       |  |
| Chemical Composition and Phase Evolution in DMAI-Derived Inorganic Perovskite Solar Cells                                     | 2019 | TiO2 | TiO2 | CsPbI3   | one-step | spin | no            | DMSO     | spiro-OMeTAD | Li+TBP | 10.7  |  |
| Monoammonium Porphyrin for Blade-Coating Stable Large-Area Perovskite Solar Cells with >18% Efficiency                        | 2019 | TiO2 | no   | MAPbI3   | one-step | spin | no            | DMF+DMSO | PCBM         | no     | 18.26 |  |
| Optimal Interfacial Engineering with Different Length of Alkylammonium Halide for Efficient and Stable Perovskite Solar Cells | 2019 | TiO2 | TiO2 | FA-MA    | one-step | spin | IPA           | DMF+DMSO | spiro-OMeTAD | Li+TBP | 22.9  |  |
| Triamine-Based Aromatic Cation as a Novel Stabilizer for Efficient Perovskite Solar Cells                                     | 2019 | SnO2 | no   | Cs-FA-MA | one-step | spin | no            | DMF+DMSO | spiro-OMeTAD | Li+TBP | 20.9  |  |
| Achieving Long-Term Operational Stability of Perovskite Solar Cells with a Stabilized Efficiency Exceeding 20% after 1000 h   | 2019 | TiO2 | TiO2 | FA-MA    | one-step | spin | diethyl ether | DMF+DMSO | PTAA         | no     | 20    |  |
| NbF5: A Novel $\alpha$ -Phase Stabilizer for FA-Based Perovskite Solar Cells with High Efficiency                             | 2019 | TiO2 | no   | FA-MA    | one-step | spin | chlorobenzene | DMF+DMSO | spiro-OMeTAD | Li+TBP | 18.3  |  |
| Origins of High Performance and Degradation in the Mixed Perovskite Solar Cells                                               | 2019 | TiO2 | no   | FA-MA    | one-step | spin | chlorobenzene | DMF+DMSO | PTAA         | Li+TBP | 20.02 |  |
| Binary solvent engineering for high-performance two-dimensional perovskite solar cells                                        | 2019 | TiO2 | no   | MAPbI3   | one-step | spin | no            | DMF+DMSO | spiro-OMeTAD | Li+TBP | 10.3  |  |
| High-Performance Perovskite Solar Cells with Excellent Humidity and Thermo-Stability via                                      | 2019 | NiOx | no   | Cs-FA-MA | one-step | spin | chlorobenzene | DMF+DMSO | PCBM         | others | 17.4  |  |

|                                                                                                                      |      |      |     |          |          |      |               |          |              |        |       |
|----------------------------------------------------------------------------------------------------------------------|------|------|-----|----------|----------|------|---------------|----------|--------------|--------|-------|
| Fluorinated Perylenediimide                                                                                          |      |      |     |          |          |      |               |          |              |        |       |
| High-Performance Perovskite Solar Cells with Excellent Humidity and Thermo-Stability via Fluorinated Perylenediimide | 2019 | NiOx | no  | MAPbI3   | one-step | spin | chlorobenzene | DMF+DMSO | PCBM         | others | 14.78 |
| 2D Intermediate Suppression for Efficient RuddlesdenPopper (RP) Phase Lead-Free Perovskite Solar Cells               | 2019 | C60  | no  | FASnI3   | one-step | spin | chlorobenzene | DMF+DMSO | PEDOT:PSS    | no     | 8.82  |
| Improving Charge Transport via Intermediate-Controlled Crystal Growth in 2D Perovskite Solar Cells                   | 2019 | TiO2 | no  | others   | one-step | spin | chlorobenzene | DMF+DMSO | spiro-OMeTAD | Li+TBP | 12    |
| Improving Charge Transport via Intermediate-Controlled Crystal Growth in 2D Perovskite Solar Cells                   | 2019 | TiO2 | no  | MAPbI3   | one-step | spin | chlorobenzene | DMSO     | spiro-OMeTAD | Li+TBP | 6.5   |
| Niobium Incorporation into CsPbI2Br for Stable and Efficient Allinorganic Perovskite Solar Cells                     | 2019 | SnO2 | no  | CsPbI2Br | one-step | spin | no            | DMF+DMSO | Without HTL  | no     | 9.05  |
| On the Relation between the Open-Circuit Voltage and Quasi-Fermi Level Splitting in Efficient Perovskite Solar Cells | 2019 | BCP  | C60 | Cs-FA-MA | one-step | spin | diethyl ether | DMF+DMSO | PTAA         | others | 19.4  |
| On the Relation between the Open-Circuit Voltage and Quasi-Fermi Level Splitting in Efficient Perovskite Solar Cells | 2019 | BCP  | C60 | Cs-FA-MA | one-step | spin | diethyl ether | DMF+DMSO | P3HT         | no     | 14.2  |
| Fabrication of Efficient and Stable CsPbI3 Perovskite Solar Cells through Cation Exchange Process                    | 2019 | TiO2 | no  | CsPbI3   | one-step | spin | anisole       | DMF      | P3HT         | no     | 6.8   |

|                                                                                                                                |      |      |      |            |          |      |               |          |              |              |       |
|--------------------------------------------------------------------------------------------------------------------------------|------|------|------|------------|----------|------|---------------|----------|--------------|--------------|-------|
| Low-Frequency Carrier Kinetics in Perovskite Solar Cells                                                                       | 2019 | SnO2 | no   | CH3NH3PbI3 | one-step | spin | diethyl ether | no       | PTAA         | no           | 10    |
| Low-Frequency Carrier Kinetics in Perovskite Solar Cells                                                                       | 2019 | SnO2 | no   | CH3NH3PbI3 | one-step | spin | diethyl ether | no       | spiro-OMeTAD | Li+TBP       | 15    |
| Overcoming Zinc Oxide Interface Instability with a Methylammonium-Free Perovskite for High-Performance Solar Cells             | 2019 | ZnO  | no   | Cs-FA      | one-step | spin | anisole       | DMF+DMSO | spiro-OMeTAD | Li+TBP       | 18    |
| Overcoming Zinc Oxide Interface Instability with a Methylammonium-Free Perovskite for High-Performance Solar Cells             | 2019 | SnO2 | no   | Cs-FA      | one-step | spin | anisole       | DMF+DMSO | spiro-OMeTAD | Li+TBP       | 19.7  |
| Cation-Exchange Approach for Fabrication of Efficient Methylammonium Tin Iodide Perovskite Solar Cells                         | 2019 | TiO2 | TiO2 | MASnI3     | one-step | spin | diethyl ether | DMF+DMSO | PTAA         | no           | 0.11  |
| Cation-Exchange Approach for Fabrication of Efficient Methylammonium Tin Iodide Perovskite Solar Cells                         | 2019 | TiO2 | TiO2 | MASnI3     | two-step | spin | diethyl ether | DMF+DMSO | PTAA         | no           | 7.13  |
| High-Performance Perovskite Solar Cells with Enhanced Environmental Stability Based on a (p-FC6H4C2H4NH3)2[PbI4] Capping Layer | 2019 | TiO2 | TiO2 | Cs-FA-MA   | two-step | spin | chlorobenzene | DMF+DMSO | spiro-OMeTAD | Li+TBP+FK209 | 18    |
| Novel Surface Passivation for Stable FA0.85MA0.15PbI3 Perovskite Solar Cells with 21.6% Efficiency                             | 2019 | TiO2 | no   | FA-MA      | one-step | spin | chlorobenzene | DMF+DMSO | spiro-OMeTAD | Li+TBP+FK210 | 19.55 |
| Perovskite/Graphene Solar Cells without a Hole-Transport Layer                                                                 | 2019 | TiO2 | TiO2 | HASnI3     | two-step | spin | diethyl ether | DMF+DMSO | spiro-OMeTAD | Li+TBP       | 12.6  |
| Perovskite/Graphene Solar Cells without a Hole-Transport Layer                                                                 | 2019 | TiO2 | TiO2 | HASnI3     | two-step | spin | diethyl ether | DMF+DMSO | spiro-OMeTAD | Li+TBP       | 2.8   |

|                                                                                                                                                  |      |      |     |          |          |      |    |          |              |                  |        |
|--------------------------------------------------------------------------------------------------------------------------------------------------|------|------|-----|----------|----------|------|----|----------|--------------|------------------|--------|
| Enhancing electron diffusion length in narrow-bandgap perovskites for efficient monolithic perovskite tandem solar cells                         | 2019 | BCP  | C60 | Cs-FA    | one-step | spin | no | DMF+DMSO | PEDOT:PSS    | no               | 22.7   |
| Defect passivation using ultrathin PTAA layers for efficient and stable perovskite solar cells with a high fill factor and eliminated hysteresis | 2019 | PCBM | no  | MAPbI3   | one-step | spin | no | GBL+DMSO | PEDOT:PSS    | no               | 16.28  |
| Interface engineering of low temperature processed all-inorganic CsPbI2Br perovskite solar cells toward PCE exceeding 14%                        | 2019 | SnO2 | no  | CsPbI2Br | one-step | spin | no | DMSO     | spiro-OMeTAD | Li+TBP+FK<br>209 | 13.4   |
| Inverted All-Inorganic CsPbI2Br Perovskite Solar Cells with Promoted Efficiency and Stability by Nickel Incorporation                            | 2019 | PCBM | C60 | CsPbI2Br | one-step | spin | no | DMSO     | P3CT         | no               | 11.8   |
| Inverted All-Inorganic CsPbI2Br Perovskite Solar Cells with Promoted Efficiency and Stability by Nickel Incorporation                            | 2019 | PCBM | C60 | CsPbI3   | one-step | spin | no | DMSO     | P3CT         | no               | 12.674 |
| Inverted All-Inorganic CsPbI2Br Perovskite Solar Cells with Promoted Efficiency and Stability by Nickel Incorporation                            | 2019 | PCBM | C60 | CsPbI3   | one-step | spin | no | DMSO     | P3CT         | no               | 12.7   |
| Inverted All-Inorganic CsPbI2Br Perovskite Solar Cells with Promoted Efficiency and Stability by Nickel Incorporation                            | 2019 | PCBM | C60 | CsPbI3   | one-step | spin | no | DMSO     | P3CT         | no               | 11.1   |
| Inverted All-Inorganic CsPbI2Br Perovskite Solar Cells with Promoted Efficiency and Stability by Nickel Incorporation                            | 2019 | PCBM | C60 | CsPbI3   | one-step | spin | no | DMSO     | P3CT         | no               | 10.06  |
| Inverted All-Inorganic CsPbI2Br Perovskite Solar Cells with Promoted Efficiency and Stability by Nickel Incorporation                            | 2019 | PCBM | C60 | CsPbI3   | one-step | spin | no | DMSO     | P3CT         | no               | 4.9    |



|                                                                                                             |      |        |     |          |          |      |               |          |              |                  |       |
|-------------------------------------------------------------------------------------------------------------|------|--------|-----|----------|----------|------|---------------|----------|--------------|------------------|-------|
| Strain Relaxation and Light Management in Tin-Lead Perovskite Solar Cells to Achieve High Efficiencies      | 2019 | PCBM   | C60 | Cs-FA-MA | one-step | spin | toluene       | DMF+DMSO | PEDOT:PSS    | no               | 18.92 |
| Strain Relaxation and Light Management in Tin-Lead Perovskite Solar Cells to Achieve High Efficiencies      | 2019 | PCBM   | C60 | FA-MA    | one-step | spin | toluene       | DMF+DMSO | PEDOT:PSS    | no               | 17.69 |
| Strain Relaxation and Light Management in Tin-Lead Perovskite Solar Cells to Achieve High Efficiencies      | 2019 | PCBM   | C60 | Cs-FA-MA | one-step | spin | toluene       | DMF+DMSO | PEDOT:PSS    | no               | 18.45 |
| Strain Relaxation and Light Management in Tin-Lead Perovskite Solar Cells to Achieve High Efficiencies      | 2019 | PCBM   | C60 | Cs-FA-MA | one-step | spin | toluene       | DMF+DMSO | PEDOT:PSS    | no               | 17.29 |
| Combustion Synthesized Zinc Oxide Electron-Transport Layers for Efficient and Stable Perovskite Solar Cells | 2019 | others | no  | MAPBI3   | one-step | spin | diethyl ethe  | DMF+DMSO | spiro-OMeTAD | Li+TBP+FK<br>209 | 1.98  |
| Combustion Synthesized Zinc Oxide Electron-Transport Layers for Efficient and Stable Perovskite Solar Cells | 2019 | others | no  | MAPBI3   | one-step | spin | chlorobenzene | DMF+DMSO | spiro-OMeTAD | Li+TBP+FK<br>209 | 12.23 |
| Combustion Synthesized Zinc Oxide Electron-Transport Layers for Efficient and Stable Perovskite Solar Cells | 2019 | others | no  | MAPBI3   | one-step | spin | chlorobenzene | DMF+DMSO | spiro-OMeTAD | Li+TBP+FK<br>209 | 16.47 |
| Combustion Synthesized Zinc Oxide Electron-Transport Layers for Efficient and Stable Perovskite Solar Cells | 2019 | others | no  | Cs-FA-MA | one-step | spin | diethyl ethe  | DMF+DMSO | spiro-OMeTAD | Li+TBP+FK<br>209 | 7.23  |
| Combustion Synthesized Zinc Oxide Electron-Transport Layers for Efficient and Stable Perovskite Solar Cells | 2019 | others | no  | Cs-FA-MA | one-step | spin | chlorobenzene | DMF+DMSO | spiro-OMeTAD | Li+TBP+FK<br>209 | 14.75 |

|                                                                                                                          |      |        |        |          |          |      |               |          |              |                  |       |
|--------------------------------------------------------------------------------------------------------------------------|------|--------|--------|----------|----------|------|---------------|----------|--------------|------------------|-------|
| Combustion Synthesized Zinc Oxide Electron-Transport Layers for Efficient and Stable Perovskite Solar Cells              | 2019 | others | no     | Cs-FA-MA | one-step | spin | chlorobenzene | DMF+DMSO | spiro-OMeTAD | Li+TBP+FK<br>209 | 18.18 |
| Combustion Synthesized Zinc Oxide Electron-Transport Layers for Efficient and Stable Perovskite Solar Cells              | 2019 | others | no     | Cs-FA    | one-step | spin | diethyl ethe  | DMF+DMSO | spiro-OMeTAD | Li+TBP+FK<br>209 | 16.06 |
| Combustion Synthesized Zinc Oxide Electron-Transport Layers for Efficient and Stable Perovskite Solar Cells              | 2019 | others | no     | Cs-FA    | one-step | spin | chlorobenzene | DMF+DMSO | spiro-OMeTAD | Li+TBP+FK<br>209 | 15.97 |
| Combustion Synthesized Zinc Oxide Electron-Transport Layers for Efficient and Stable Perovskite Solar Cells              | 2019 | others | no     | Cs-FA    | one-step | spin | chlorobenzene | DMF+DMSO | spiro-OMeTAD | Li+TBP+FK<br>209 | 19.09 |
| Influence of hole transport material ionization energy on the performance of perovskite solar cells                      | 2019 | BCP    | C60    | MAPBI3   | one-step | spin | no            | DMF+DMSO | others       | no               | 14.4  |
| Influence of hole transport material ionization energy on the performance of perovskite solar cells                      | 2019 | BCP    | C60    | MAPBI3   | one-step | spin | no            | DMF+DMSO | others       | no               | 16.3  |
| Influence of hole transport material ionization energy on the performance of perovskite solar cells                      | 2019 | BCP    | C60    | MAPBI3   | one-step | spin | no            | DMF+DMSO | others       | no               | 12.2  |
| In situ growth of perovskite stacking layers for high-efficiency carbon-based hole conductor free perovskite solar cells | 2019 | c-TiO2 | m-TiO2 | MAPBI3   | one-step | spin | chlorobenzene | DMF+DMSO | spiro-OMeTAD | Li+TBP+FK<br>209 | 10.7  |
| Enhanced performance of tin-based perovskite solar cells induced by an ammonium hypophosphite additive                   | 2019 | PCBM   | no     | FASnI3   | one-step | spin | chlorobenzene | DMF+DMSO | others       | no               | 7.34  |

|                                                                                                                                       |      |      |     |          |          |      |               |          |              |        |       |
|---------------------------------------------------------------------------------------------------------------------------------------|------|------|-----|----------|----------|------|---------------|----------|--------------|--------|-------|
| Fluorinated Low-Dimensional Ruddlesden-Popper Perovskite Solar Cells with over 17% Power Conversion Efficiency and Improved Stability | 2019 | PCBM | no  | MAPbI3   | one-step | spin | no            | DMF      | PTAA         | no     | 16.34 |
| Fluorinated Low-Dimensional Ruddlesden-Popper Perovskite Solar Cells with over 17% Power Conversion Efficiency and Improved Stability | 2019 | PCBM | no  | MAPbI3   | one-step | spin | no            | DMF      | PTAA         | no     | 9.7   |
| Amphiphilic Fullerenes Employed to Improve the Quality of Perovskite Films and the Stability of Perovskite Solar Cells                | 2019 | PCBM | BCP | Cs-FA-MA | one-step | spin | chlorobenzene | DMF+DMSO | others       | no     | 14.36 |
| Flexible quintuple cation perovskite solar cells with high efficiency                                                                 | 2019 | SnO2 | no  | Cs-FA-MA | one-step | spin | chlorobenzene | DMF+DMSO | spiro-OMeTAD | Li+TBP | 18.32 |
| Flexible quintuple cation perovskite solar cells with high efficiency                                                                 | 2019 | SnO2 | no  | Cs-FA-MA | one-step | spin | chlorobenzene | DMF+DMSO | spiro-OMeTAD | Li+TBP | 18.68 |
| Flexible quintuple cation perovskite solar cells with high efficiency                                                                 | 2019 | SnO2 | no  | Cs-FA-MA | one-step | spin | chlorobenzene | DMF+DMSO | spiro-OMeTAD | Li+TBP | 19.03 |
| Flexible quintuple cation perovskite solar cells with high efficiency                                                                 | 2019 | SnO2 | no  | Cs-FA-MA | one-step | spin | chlorobenzene | DMF+DMSO | spiro-OMeTAD | Li+TBP | 19.46 |
| Flexible quintuple cation perovskite solar cells with high efficiency                                                                 | 2019 | SnO2 | no  | Cs-FA-MA | one-step | spin | chlorobenzene | DMF+DMSO | spiro-OMeTAD | Li+TBP | 19.75 |
| Flexible quintuple cation perovskite solar cells with high efficiency                                                                 | 2019 | SnO2 | no  | Cs-FA-MA | one-step | spin | chlorobenzene | DMF+DMSO | spiro-OMeTAD | Li+TBP | 20.13 |
| Flexible quintuple cation perovskite solar cells with high efficiency                                                                 | 2019 | SnO2 | no  | Cs-FA-MA | one-step | spin | chlorobenzene | DMF+DMSO | spiro-OMeTAD | Li+TBP | 19.15 |

|                                                                                                                                                |      |         |      |                                 |          |          |                      |                     |              |                  |       |
|------------------------------------------------------------------------------------------------------------------------------------------------|------|---------|------|---------------------------------|----------|----------|----------------------|---------------------|--------------|------------------|-------|
| Titanium-carbide MXenes for work function and interface engineering in perovskite solar cells                                                  | 2019 | TiO2    | TiO2 | MAPbI3                          | one-step | spin     | chlorobenzene        | DMF+DMSO            | spiro-OMeTAD | Li+TBP+FK<br>209 | 15.2  |
| Perovskite Ink with an Ultrawide Processing Window for Efficient and Scalable Perovskite Solar Cells in Ambient Air                            | 2019 | SnO2    | no   | MAPbI3                          | two-step | spin     | diethyl ethe         | DMF+DMSO<br>+others | spiro-OMeTAD | Li+TBP+FK<br>209 | 11.8  |
| A Low-temperature carbon electrode with benign perovskite compatibility and high flexibility in Carbon based perovskite solar cells            | 2019 | TiO2    | TiO2 | Cs-FA-MA                        | one-step | spin     | no                   | DMF+DMSO            | Without HTL  | no               | 11.7  |
| A Low-temperature carbon electrode with benign perovskite compatibility and high flexibility in Carbon based perovskite solar cells            | 2019 | TiO2    | TiO2 | Cs-FA-MA                        | one-step | spin     | no                   | DMF+DMSO            | PEDOT:PSS    | no               | 13.6  |
| A Low-temperature carbon electrode with benign perovskite compatibility and high flexibility in Carbon based perovskite solar cells            | 2019 | SnO2    | no   | Cs-FA-MA                        | one-step | spin     | no                   | DMF+DMSO            | PEDOT:PSS    | no               | 7.04  |
| Dopant-Free, Amorphous–Crystalline Heterophase SnO2 Electron Transport Bilayer Enables >20% Efficiency in Triple-Cation Perovskite Solar Cells | 2020 | Bi-SnO2 | no   | Cs0.05(FAPbI3)0.85(MAPbBr3)0.15 | one-step | spin 2-3 | ethyl acetate+hexane | DMF+DMSO            | Spiro-OMeTAD | Li+TBP           | 20.39 |
| Dopant-Free, Amorphous–Crystalline Heterophase SnO2 Electron Transport Bilayer Enables >20% Efficiency in Triple-Cation Perovskite Solar Cells | 2020 | SG-SnO2 | no   | Cs0.05(FAPbI3)0.85(MAPbBr3)0.15 | one-step | spin 2-3 | ethyl acetate+hexane | DMF+DMSO            | Spiro-OMeTAD | Li+TBP           | 18.67 |

|                                                                                                                                                            |      |                     |                   |                                                                                                                |          |          |                      |          |              |        |       |
|------------------------------------------------------------------------------------------------------------------------------------------------------------|------|---------------------|-------------------|----------------------------------------------------------------------------------------------------------------|----------|----------|----------------------|----------|--------------|--------|-------|
| Dopant-Free, Amorphous–Crystalline Heterophase SnO <sub>2</sub> Electron Transport Bilayer Enables >20% Efficiency in Triple-Cation Perovskite Solar Cells | 2020 | NP-SnO <sub>2</sub> | no                | Cs <sub>0.05</sub> (FAPbI <sub>3</sub> ) <sub>0.85</sub> (MA PbBr <sub>3</sub> ) <sub>0.15</sub>               | one-step | spin 2-3 | ethyl acetate+hexane | DMF+DMSO | Spiro-OMeTAD | Li+TBP | 18.49 |
| FAPbI <sub>3</sub> -Based Perovskite Solar Cells Employing Hexyl-Based Ionic Liquid with an Efficiency Over 20% and Excellent Long-Term Stability          | 2020 | TiO <sub>2</sub>    | mTiO <sub>2</sub> | FAPbI <sub>3</sub> -HMII                                                                                       | one-step | spin 2-3 | chlorobenzene        | DMF+DMSO | Spiro-OMeTAD | Li+TBP | 20.6  |
| FAPbI <sub>3</sub> -Based Perovskite Solar Cells Employing Hexyl-Based Ionic Liquid with an Efficiency Over 20% and Excellent Long-Term Stability          | 2020 | TiO <sub>2</sub>    | mTiO <sub>2</sub> | FAPbI <sub>3</sub>                                                                                             | one-step | spin 2-3 | chlorobenzene        | DMF+DMSO | Spiro-OMeTAD | Li+TBP | 17.1  |
| TiO <sub>2</sub> /WO <sub>3</sub> Bilayer as Electron Transport Layer for Efficient Planar Perovskite Solar Cell with Efficiency Exceeding 20%             | 2020 | TiO <sub>2</sub>    | WO <sub>3</sub>   | MAPbI <sub>3</sub>                                                                                             | two-step | spin     | no                   | DMF      | Spiro-OMeTAD | Li+TBP | 20.14 |
| Acetic Acid Assisted Crystallization Strategy for High Efficiency and Long-Term Stable Perovskite Solar Cell                                               | 2020 | TiO <sub>2</sub>    | mTiO <sub>2</sub> | Cs <sub>0.05</sub> FA <sub>0.8</sub> MA <sub>0.15</sub> Pb(I <sub>0.85</sub> Br <sub>0.15</sub> ) <sub>3</sub> | one-step | spin 2-3 | acetic acid          | DMF+DMSO | Spiro-OMeTAD | Li+TBP | 22    |
| Acetic Acid Assisted Crystallization Strategy for High Efficiency and Long-Term Stable Perovskite Solar Cell                                               | 2020 | TiO <sub>2</sub>    | mTiO <sub>2</sub> | Cs <sub>0.05</sub> FA <sub>0.9</sub> MA <sub>0.05</sub> Pb(I <sub>0.95</sub> Br <sub>0.05</sub> ) <sub>3</sub> | one-step | spin 2-3 | chlorobenzene        | DMF+DMSO | Spiro-OMeTAD | Li+TBP | 23    |
| Low-Temperature-Processed WO <sub>x</sub> as Electron Transfer Layer for Planar Perovskite Solar Cells Exceeding 20% Efficiency                            | 2020 | E-WO <sub>x</sub>   | no                | MAPbI <sub>3</sub>                                                                                             | one-step | spin 2-3 | chlorobenzene        | DMF+DMSO | Spiro-OMeTAD | Li+TBP | 14.32 |
| Low-Temperature-Processed WO <sub>x</sub> as Electron Transfer Layer for Planar Perovskite Solar Cells Exceeding 20% Efficiency                            | 2020 | B-WO <sub>x</sub>   | no                | MAPbI <sub>3</sub>                                                                                             | one-step | spin 2-3 | chlorobenzene        | DMF+DMSO | Spiro-OMeTAD | Li+TBP | 17.85 |

|                                                                                                                                                                 |      |            |    |                                                |          |          |                     |               |              |        |       |
|-----------------------------------------------------------------------------------------------------------------------------------------------------------------|------|------------|----|------------------------------------------------|----------|----------|---------------------|---------------|--------------|--------|-------|
| Low-Temperature-Processed WOxas Electron Transfer Layer for Planar Perovskite Solar Cells Exceeding 20% Efficiency                                              | 2020 | H-WOx      | no | MAPbI3                                         | one-step | spin 2-3 | chlorobenzene       | DMF+DMSO      | Spiro-OMeTAD | Li+TBP | 19.16 |
| Low-Temperature-Processed WOxas Electron Transfer Layer for Planar Perovskite Solar Cells Exceeding 20% Efficiency                                              | 2020 | H-WOx      | no | (FAPbI3) <sub>1-x</sub> (MAPbBr3) <sub>x</sub> | two-step | spin     | no                  | DMF+DMSO +IPA | Spiro-OMeTAD | Li+TBP | 20.77 |
| Over 20% Efficiency in Methylammonium Lead Iodide Perovskite Solar Cells with Enhanced Stability via "in Situ Solidification" of the TiO2 Compact Layer         | 2020 | CL-GP TiO2 | no | MAPbI3                                         | one-step | spin     | no                  | DMF           | Spiro-OMeTAD | Li+TBP | 20.43 |
| Over 20% Efficiency in Methylammonium Lead Iodide Perovskite Solar Cells with Enhanced Stability via "in Situ Solidification" of the TiO2 Compact Layer         | 2020 | CL-ND TiO2 | no | MAPbI3                                         | one-step | spin     | no                  | DMF           | Spiro-OMeTAD | Li+TBP | 17.51 |
| Mediator-Antisolvent Strategy to Stabilize All-Inorganic CsPbI3 for Perovskite Solar Cells with Efficiency Exceeding 16%                                        | 2020 | SnO2       | no | MAI-CsPbI3                                     | one-step | spin     | PCBM+chloro benzene | DMF           | Spiro-OMeTAD | Li+TBP | 16.04 |
| Mediator-Antisolvent Strategy to Stabilize All-Inorganic CsPbI3 for Perovskite Solar Cells with Efficiency Exceeding 16%                                        | 2020 | SnO2       | no | CsPbI3                                         | one-step | spin     | PCBM+chloro benzene | DMF           | Spiro-OMeTAD | Li+TBP | 14.34 |
| Mediator-Antisolvent Strategy to Stabilize All-Inorganic CsPbI3 for Perovskite Solar Cells with Efficiency Exceeding 16%                                        | 2020 | SnO2       | no | CsPbI3                                         | one-step | spin     | chlorobenzene       | DMF           | Spiro-OMeTAD | Li+TBP | 10.6  |
| Dual Functions of Crystallization Control and Defect Passivation Enabled by an Ionic Compensation Strategy for Stable and High-Efficient Perovskite Solar Cells | 2020 | SnO2       | no | ITU-MAPbI3                                     | one-step | spin     | ethyl acetate       | DMF+DMSO      | Spiro-OMeTAD | Li+TBP | 20.39 |

|                                                                                                                                                                 |      |            |      |                                              |          |          |               |              |                   |        |       |
|-----------------------------------------------------------------------------------------------------------------------------------------------------------------|------|------------|------|----------------------------------------------|----------|----------|---------------|--------------|-------------------|--------|-------|
| Dual Functions of Crystallization Control and Defect Passivation Enabled by an Ionic Compensation Strategy for Stable and High-Efficient Perovskite Solar Cells | 2020 | SnO2       | no   | MAPbI3                                       | one-step | spin     | ethyl acetate | DMF+DMSO     | Spiro-OMeTAD      | Li+TBP | 17.75 |
| 1000 h Operational Lifetime Perovskite Solar Cells by Ambient Melting Encapsulation                                                                             | 2020 | SnO2       | no   | Rb0.09Cs0.06[(FA0.85MA0.15)Pb(Br0.15I0.85)3] | one-step | spin     | chlorobenzene | DMF+DMSO     | Spiro-OMeTAD      | Li+TBP | 20.5  |
| A holistic approach to interface stabilization for efficient perovskite solar modules with over 2,000-hour operational stability                                | 2020 | SnO2-EDTAK | no   | Cs0.05FA0.54MA0.41Pb(I0.98Br0.02)3-EAMA      | two-step | spin     | no            | DMF+DMSO+IPA | Spiro-OMeTAD/P3HT | Li+TBP | 16.1  |
| A holistic approach to interface stabilization for efficient perovskite solar modules with over 2,000-hour operational stability                                | 2020 | SnO2-EDTAK | no   | Cs0.05FA0.54MA0.41Pb(I0.98Br0.02)3-EAMA      | two-step | spin     | no            | DMF+DMSO+IPA | Spiro-OMeTAD      | Li+TBP | 16.6  |
| A holistic approach to interface stabilization for efficient perovskite solar modules with over 2,000-hour operational stability                                | 2020 | SnO2-EDTAK | no   | Cs0.05FA0.54MA0.41Pb(I0.98Br0.02)3           | two-step | spin     | no            | DMF+DMSO+IPA | Spiro-OMeTAD      | Li+TBP | 13.7  |
| A holistic approach to interface stabilization for efficient perovskite solar modules with over 2,000-hour operational stability                                | 2020 | SnO2       | no   | Cs0.05FA0.54MA0.41Pb(I0.98Br0.02)3           | two-step | spin     | no            | DMF+DMSO+IPA | Spiro-OMeTAD      | Li+TBP | 11.4  |
| Intermolecular $\pi$ - $\pi$ Conjugation Self-Assembly to Stabilize Surface Passivation of Highly Efficient Perovskite Solar Cells                              | 2020 | TiO2       | PCBA | PbI2, MABr, FAI, MACl, CsI                   | one-step | spin 2-3 | chlorobenzene | DMF+DMSO     | Spiro-OMeTAD      | Li+TBP | 20.8  |
| Intermolecular $\pi$ - $\pi$ Conjugation Self-Assembly to Stabilize Surface Passivation of                                                                      | 2020 | TiO2       | PCBA | TPPO/PbI2, MABr, FAI, M                      | one-step | spin 2-3 | chlorobenzene | DMF+DMSO     | Spiro-OMeTAD      | Li+TBP | 21.4  |

|                                                                                                                                                   |      |      |      |                                     |          |          |               |          |              |                  |       |  |
|---------------------------------------------------------------------------------------------------------------------------------------------------|------|------|------|-------------------------------------|----------|----------|---------------|----------|--------------|------------------|-------|--|
| Highly Efficient Perovskite Solar Cells                                                                                                           |      |      |      | ACI,CsI                             |          |          |               |          |              |                  |       |  |
| Intermolecular $\pi$ - $\pi$ Conjugation Self-Assembly to Stabilize Surface Passivation of Highly Efficient Perovskite Solar Cells                | 2020 | TiO2 | PCBA | TBPO/PbI2,<br>MABr,FAI,M<br>ACI,CsI | one-step | spin 2-3 | chlorobenzene | DMF+DMSO | Spiro-OMeTAD | Li+TBP           | 22.1  |  |
| Efficient perovskite solar cells via improved carrier management                                                                                  | 2020 | SnO2 | no   | PbI2,FAI,MA<br>Cl,MAPbBr3           | one-step | spin 2-3 | diethyl ether | DMF+DMSO | Spiro-OMeTAD | Li+TBP+FK<br>209 | 25.2  |  |
| Dopant-Free, Donor-Acceptor-Type Polymeric Hole-Transporting Materials for the Perovskite Solar Cells with Power Conversion Efficiencies over 20% | 2020 | SnO2 | no   | PbI2,FAI,Pb<br>Br2,MABr,Cs<br>I     | one-step | spin 2-3 | chlorobenzene | DMF+DMSO | PBDTT        | Li+TBP+FK<br>209 | 20.28 |  |
| Dopant-Free, Donor-Acceptor-Type Polymeric Hole-Transporting Materials for the Perovskite Solar Cells with Power Conversion Efficiencies over 20% | 2020 | SnO2 | no   | PbI2,FAI,Pb<br>Br2,MABr,Cs<br>I     | one-step | spin 2-3 | chlorobenzene | DMF+DMSO | PBTIT        | Li+TBP+FK<br>209 | 19.48 |  |
| Dopant-Free, Donor-Acceptor-Type Polymeric Hole-Transporting Materials for the Perovskite Solar Cells with Power Conversion Efficiencies over 20% | 2020 | SnO2 | no   | PbI2,FAI,Pb<br>Br2,MABr,Cs<br>I     | one-step | spin 2-3 | chlorobenzene | DMF+DMSO | Spiro-OMeTAD | Li+TBP+FK<br>209 | 18.32 |  |
| Dopant-Free, Donor-Acceptor-Type Polymeric Hole-Transporting Materials for the Perovskite Solar Cells with Power Conversion Efficiencies over 20% | 2020 | SnO2 | no   | PbI2,FAI,Pb<br>Br2,MABr,Cs<br>I     | one-step | spin 2-3 | chlorobenzene | DMF+DMSO | P3HT         | Li+TBP+FK<br>209 | 13.98 |  |
| Lewis-Base Containing spiro Type Hole Transporting Materials for High-Performance Perovskite Solar Cells with Efficiency                          | 2020 | SnO2 | no   | PbI2,FAI,Pb<br>Br2,MABr,Cs<br>I     | one-step | spin 2-3 | chlorobenzene | DMF+DMSO | Spiro-CN     | Li+TBP           | 19.9  |  |



|                                                                                                                                          |      |      |       |                                      |          |          |               |          |              |           |       |
|------------------------------------------------------------------------------------------------------------------------------------------|------|------|-------|--------------------------------------|----------|----------|---------------|----------|--------------|-----------|-------|
| Approaching 20%                                                                                                                          |      |      |       |                                      |          |          |               |          |              |           |       |
| Lewis-Base Containing spiro Type Hole Transporting Materials for High-Performance Perovskite Solar Cells with Efficiency Approaching 20% | 2020 | SnO2 | no    | PbI2,FAI,PbBr2,MABr,CsI              | one-step | spin 2-3 | chlorobenzene | DMF+DMSO | Spiro-PS     | Li+TBP    | 18.08 |
| Lewis-Base Containing spiro Type Hole Transporting Materials for High-Performance Perovskite Solar Cells with Efficiency Approaching 20% | 2020 | SnO2 | no    | PbI2,FAI,PbBr2,MABr,CsI              | one-step | spin 2-3 | chlorobenzene | DMF+DMSO | Spiro-OMeTAD | Li+TBP    | 19.85 |
| p-Doping of a hole transport material via a poly(ionic-liquid) for over 20% efficiency and hysteresis-free perovskite solar cells        | 2020 | TiO2 | mTiO2 | K0.05(MA0.15FA0.85)0.95PbI2.55Br0.45 | one-step | spin     | chlorobenzene | DMF+DMSO | Spiro-OMeTAD | PVBI-TFSI | 20.33 |
| p-Doping of a hole transport material via a poly(ionic-liquid) for over 20% efficiency and hysteresis-free perovskite solar cells        | 2020 | TiO2 | mTiO2 | K0.05(MA0.15FA0.85)0.95PbI2.55Br0.45 | one-step | spin     | chlorobenzene | DMF+DMSO | Spiro-OMeTAD | Li+TBP    | 17.71 |
| RbCs(MAFA)PbI3 perovskite solar cell with 22.81% efficiency using the precise ions cascade regulation                                    | 2020 | NiOx | no    | Rb0.2Cs0.2(MA0.3FA0.3)PbI3           | one-step | spin 2-3 | chlorobenzene | DMF+DMSO | PCBM         | no        | 22.81 |
| RbCs(MAFA)PbI3 perovskite solar cell with 22.81% efficiency using the precise ions cascade regulation                                    | 2020 | NiOx | no    | (MA0.5FA0.5)PbI3                     | one-step | spin 2-3 | chlorobenzene | DMF+DMSO | PCBM         | no        | 17.15 |
| RbCs(MAFA)PbI3 perovskite solar cell with 22.81% efficiency using the precise ions cascade regulation                                    | 2020 | NiOx | no    | Rb0.05Cs0.05(MA0.45FA0.45)PbI3       | one-step | spin 2-3 | chlorobenzene | DMF+DMSO | PCBM         | no        | 19.16 |

|                                                                                                             |      |      |       |                                |          |          |               |          |              |              |       |
|-------------------------------------------------------------------------------------------------------------|------|------|-------|--------------------------------|----------|----------|---------------|----------|--------------|--------------|-------|
| RbCs(MAFA)PbI3 perovskite solar cell with 22.81% efficiency using the precise ions cascade regulation       | 2020 | NiOx | no    | Rb0.1Cs0.1(MA0.4FA0.4)PbI3     | one-step | spin 2-3 | chlorobenzene | DMF+DMSO | PCBM         | no           | 20.6  |
| RbCs(MAFA)PbI3 perovskite solar cell with 22.81% efficiency using the precise ions cascade regulation       | 2020 | NiOx | no    | Rb0.15Cs0.15(MA0.35FA0.35)PbI3 | one-step | spin 2-3 | chlorobenzene | DMF+DMSO | PCBM         | no           | 21.67 |
| RbCs(MAFA)PbI3 perovskite solar cell with 22.81% efficiency using the precise ions cascade regulation       | 2020 | NiOx | no    | Rb0.25Cs0.25(MA0.25FA0.25)PbI3 | one-step | spin 2-3 | chlorobenzene | DMF+DMSO | PCBM         | no           | 21.05 |
| Efficient and stable Ruddlesden–Popper perovskite solar cell with tailored interlayer molecular interaction | 2020 | PCBM | no    | (MTEA)2(MA)4Pb5I16             | one-step | spin     | no            | MAAc     | PEDOT:PSS    | no           | 18.06 |
| Stable perovskite solar cells with efficiency exceeding 24.8% and 0.3-V voltage loss                        | 2020 | TiO2 | mTiO2 | FAPbI3                         | one-step | spin     | diethyl ether | DMF+DMSO | Spiro-OMeTAD | Li+TBP+FK209 | 23.44 |
| Stable perovskite solar cells with efficiency exceeding 24.8% and 0.3-V voltage loss                        | 2020 | TiO2 | mTiO2 | FAPbI3                         | one-step | spin     | diethyl ether | DMF+DMSO | Spiro-mF     | Li+TBP+FK209 | 24.82 |
| Stable perovskite solar cells with efficiency exceeding 24.8% and 0.3-V voltage loss                        | 2020 | TiO2 | mTiO2 | FAPbI3                         | one-step | spin     | diethyl ether | DMF+DMSO | Spiro-oF     | Li+TBP+FK209 | 23.56 |
| Controlled n-Doping in Air-Stable CsPbI2Br Perovskite Solar Cells with a Record Efficiency of 16.79%        | 2020 | TiO2 | no    | Ca/CsPbI2Br                    | one-step | spin 2-3 | no            | DMF+DMSO | Spiro-OMeTAD | Li+TBP       | 16.79 |
| Controlled n-Doping in Air-Stable CsPbI2Br Perovskite Solar Cells with a Record Efficiency of 16.79%        | 2020 | TiO2 | no    | CsPbI2Br                       | one-step | spin 2-3 | no            | DMF+DMSO | Spiro-OMeTAD | Li+TBP       | 14.89 |
| Tailored Amphiphilic Molecular Mitigators for Stable Perovskite Solar Cells with 23.5%                      | 2020 | TiO2 | mTiO2 | Cs0.05FA0.85MA0.10Pb(I         | one-step | spin 2-3 | chlorobenzene | DMF+DMSO | Spiro-OMeTAD | Li+TBP       | 23.5  |

|                                                                                                   |      |       |                |                                                     |          |          |               |          |              |                  |       |  |
|---------------------------------------------------------------------------------------------------|------|-------|----------------|-----------------------------------------------------|----------|----------|---------------|----------|--------------|------------------|-------|--|
| Efficiency                                                                                        |      |       |                | 0.97Br0.03)3<br>/tBBAI                              |          |          |               |          |              |                  |       |  |
| Tailored Amphiphilic Molecular Mitigators for Stable Perovskite Solar Cells with 23.5% Efficiency | 2020 | TiO2  | mTiO2          | Cs0.05FA0.8<br>5MA0.10Pb(I<br>0.97Br0.03)3<br>/PEAI | one-step | spin 2-3 | chlorobenzene | DMF+DMSO | Spiro-OMeTAD | Li+TBP           | 22.7  |  |
| Tailored Amphiphilic Molecular Mitigators for Stable Perovskite Solar Cells with 23.5% Efficiency | 2020 | TiO2  | mTiO2          | Cs0.05FA0.8<br>5MA0.10Pb(I<br>0.97Br0.03)3          | one-step | spin 2-3 | chlorobenzene | DMF+DMSO | Spiro-OMeTAD | Li+TBP           | 20.1  |  |
| Stable and High-Efficiency Methylammonium-Free Perovskite Solar Cells                             | 2020 | TiO2  | mTiO2-<br>SnO2 | (Cs0.17FA0.<br>83)Pb(I0.89<br>Br0.08Cl0.03<br>)3    | one-step | spin 2-3 | chlorobenzene | DMF+DMSO | Spiro-OMeTAD | Li+TBP+FK<br>209 | 20.5  |  |
| Stable and High-Efficiency Methylammonium-Free Perovskite Solar Cells                             | 2020 | TiO2  | mTiO2-<br>SnO2 | (Cs0.08FA0.<br>8MA0.12)Pb<br>(I0.88Br0.12)<br>3     | one-step | spin 2-3 | chlorobenzene | DMF+DMSO | Spiro-OMeTAD | Li+TBP+FK<br>209 | 19    |  |
| Gradient Energy Alignment Engineering for Planar Perovskite Solar Cells with Efficiency Over 23%  | 2020 | In2O3 | SnO2           | PbI2,FAI,MA<br>I,MACl                               | two-step | spin     | no            | DMF+DMSO | Spiro-OMeTAD | Li+TBP           | 23.24 |  |
| Gradient Energy Alignment Engineering for Planar Perovskite Solar Cells with Efficiency Over 23%  | 2020 | SnO2  | 0              | PbI2,FAI,MA<br>I,MACl                               | two-step | spin     | no            | DMF+DMSO | Spiro-OMeTAD | Li+TBP           | 21.42 |  |
| Gradient Energy Alignment Engineering for Planar Perovskite Solar Cells with Efficiency Over 23%  | 2020 | In2O3 | 0              | PbI2,FAI,MA<br>I,MACl                               | two-step | spin     | no            | DMF+DMSO | Spiro-OMeTAD | Li+TBP           | 19.21 |  |

|                                                                                                                                                              |      |                                  |                                         |                                                                                                                                   |          |          |               |          |              |               |       |
|--------------------------------------------------------------------------------------------------------------------------------------------------------------|------|----------------------------------|-----------------------------------------|-----------------------------------------------------------------------------------------------------------------------------------|----------|----------|---------------|----------|--------------|---------------|-------|
| Precursor Engineering for Ambient-Compatible Antisolvent-Free Fabrication of High-Efficiency CsPbI <sub>2</sub> Br Perovskite Solar Cells                    | 2020 | TiO <sub>2</sub>                 | no                                      | CsPbI <sub>2</sub> Br                                                                                                             | one-step | spin 2-3 | no            | DMSO     | PTAA         | TPFPB         | 16.14 |
| High-Performance CsPbI <sub>x</sub> Br <sub>3-x</sub> All-Inorganic Perovskite Solar Cells with Efficiency over 18% via Spontaneous Interfacial Manipulation | 2020 | SnO <sub>2</sub>                 | no                                      | GABr/CsPbI <sub>x</sub> Br <sub>3-x</sub>                                                                                         | one-step | spin     | no            | DMF+DMSO | Spiro-OMeTAD | Li+TBP+FK 209 | 18.06 |
| High-Performance CsPbI <sub>x</sub> Br <sub>3-x</sub> All-Inorganic Perovskite Solar Cells with Efficiency over 18% via Spontaneous Interfacial Manipulation | 2020 | SnO <sub>2</sub>                 | no                                      | CsPbI <sub>x</sub> Br <sub>3-x</sub>                                                                                              | one-step | spin     | no            | DMF+DMSO | Spiro-OMeTAD | Li+TBP+FK 209 | 13.64 |
| Boosting Multiple Interfaces by Co-Doped Graphene Quantum Dots for High Efficiency and Durability Perovskite Solar Cells                                     | 2020 | α-Fe <sub>2</sub> O <sub>3</sub> | NSGQDS                                  | MAPbI <sub>3</sub> /NSGQDS                                                                                                        | one-step | spin     | chlorobenzene | DMF      | Spiro-OMeTAD | Li+TBP        | 19.2  |
| Double-Sided Surface Passivation of 3D Perovskite Film for High-Efficiency Mixed-Dimensional Perovskite Solar Cells                                          | 2020 | TiO <sub>2</sub>                 | mTiO <sub>2</sub> -PMMA/PCBM            | n-BAI-Cs <sub>0.07</sub> Rb <sub>0.03</sub> FA <sub>0.765</sub> MA <sub>0.135</sub> PbI <sub>2.55</sub> Br <sub>0.45</sub> -n-BAI | one-step | spin 2-3 | chlorobenzene | DMF+DMSO | Spiro-OMeTAD | Li+TBP        | 22.77 |
| Highly stable and Efficient Perovskite Solar Cells Based on FAMA-Perovskite-Cu:NiO Composites with 20.7% Efficiency and 80.5% Fill Factor                    | 2020 | TiO <sub>2</sub>                 | mAl <sub>2</sub> O <sub>3</sub> -Cu:NiO | FA <sub>0.026</sub> MA <sub>0.974</sub> PbI <sub>3-y</sub> Cl <sub>y</sub> -Cu:NiO                                                | one-step | spin     | no            | no       | Spiro-OMeTAD | Li+TBP        | 20.67 |
| Highly stable and Efficient Perovskite Solar Cells Based on FAMA-Perovskite-Cu:NiO Composites with 20.7% Efficiency and 80.5% Fill Factor                    | 2020 | TiO <sub>2</sub>                 | mAl <sub>2</sub> O <sub>3</sub> -Cu:NiO | MAPbI <sub>3-y</sub> Cl <sub>y</sub>                                                                                              | one-step | spin     | no            | no       | Spiro-OMeTAD | Li+TBP        | 16.2  |

|                                                                                                                                                   |      |           |               |                                                |          |          |               |          |              |        |       |
|---------------------------------------------------------------------------------------------------------------------------------------------------|------|-----------|---------------|------------------------------------------------|----------|----------|---------------|----------|--------------|--------|-------|
| Highly stable and Efficient Perovskite Solar Cells Based on FAMA-Perovskite-Cu:NiO Composites with 20.7% Efficiency and 80.5% Fill Factor         | 2020 | TiO2      | mAl2O3-Cu:NiO | MAPbI3-yCl<br>y-Cu:NiO                         | one-step | spin     | no            | no       | Spiro-OMeTAD | Li+TBP | 17.7  |
| Nonaromatic Green-Solvent-Processable, Dopant-Free, and Lead-Capturable Hole Transport Polymers in Perovskite Solar Cells with High Efficiency    | 2020 | SnO2      | no            | Cs0.06FA0.7<br>8MA0.16Pb0<br>.94I2.4Br0.4<br>8 | one-step | spin     | chlorobenzene | DMF+DMSO | alkoxy-PTEG  | no     | 21.2  |
| Synergistic Cascade Carrier Extraction via Dual Interfacial Positioning of Ambipolar Black Phosphorene for High-Efficiency Perovskite Solar Cells | 2020 | TiO2      | mTiO2-BP      | Cs0.05MA0.<br>16FA0.79Pb<br>(I0.83Br0.17)<br>3 | one-step | spin 2-3 | chlorobenzene | DMF+DMSO | Spiro-OMeTAD | Li+TBP | 19.83 |
| Synergistic Cascade Carrier Extraction via Dual Interfacial Positioning of Ambipolar Black Phosphorene for High-Efficiency Perovskite Solar Cells | 2020 | TiO2      | mTiO2         | Cs0.05MA0.<br>16FA0.79Pb<br>(I0.83Br0.17)<br>3 | one-step | spin 2-3 | chlorobenzene | DMF+DMSO | Spiro-OMeTAD | Li+TBP | 16.95 |
| High-Efficiency CsPbI2Br Perovskite Solar Cells with Dopant-Free Poly(3-hexylthiophene) Hole Transporting Layers                                  | 2020 | SnO2      | no            | CsPbI2Br                                       | one-step | spin     | no            | DMSO     | P3HT         | no     | 15.5  |
| Graphdiyne: Bridging SnO2 and Perovskite in Planar Solar Cells                                                                                    | 2020 | GDY-SnO2  | no            | CsMAFAPbI<br>Br                                | one-step | spin 2-3 | chlorobenzene | DMF+DMSO | Spiro-OMeTAD | Li+TBP | 21.11 |
| Graphdiyne: Bridging SnO2 and Perovskite in Planar Solar Cells                                                                                    | 2020 | SnO2      | no            | CsMAFAPbI<br>Br                                | one-step | spin 2-3 | chlorobenzene | DMF+DMSO | Spiro-OMeTAD | Li+TBP | 19.17 |
| Red-Carbon-Quantum-Dot-Doped SnO2 Composite with Enhanced Electron Mobility for Efficient and Stable Perovskite Solar Cells                       | 2020 | SnO2-RCQs | no            | Cs0.05FA0.8<br>1MA0.14PbI<br>2.55Br0.45        | one-step | spin 2-3 | chlorobenzene | DMF+DMSO | Spiro-OMeTAD | no     | 22.77 |

|                                                                                                                                        |      |          |       |                                                                                                                                    |          |          |               |          |              |                  |       |
|----------------------------------------------------------------------------------------------------------------------------------------|------|----------|-------|------------------------------------------------------------------------------------------------------------------------------------|----------|----------|---------------|----------|--------------|------------------|-------|
| Red-Carbon-Quantum-Dot-Doped SnO2 Composite with Enhanced Electron Mobility for Efficient and Stable Perovskite Solar Cells            | 2020 | SnO2     | no    | Cs0.05FA0.8<br>1MA0.14PbI<br>2.55Br0.45                                                                                            | one-step | spin 2-3 | chlorobenzene | DMF+DMSO | Spiro-OMeTAD | no               | 19.15 |
| Simultaneous Contact and Grain-Boundary Passivation in Planar Perovskite Solar Cells Using SnO2-KCl Composite Electron Transport Layer | 2020 | SnO2-KCl | no    | MAFAPbI <sub>3</sub> Br                                                                                                            | two-step | spin     | no            | DMF+DMSO | Spiro-OMeTAD | Li+TBP           | 22.2  |
| Simultaneous Contact and Grain-Boundary Passivation in Planar Perovskite Solar Cells Using SnO2-KCl Composite Electron Transport Layer | 2020 | SnO2     | no    | MAFAPbI <sub>3</sub> Br                                                                                                            | two-step | spin     | no            | DMF+DMSO | Spiro-OMeTAD | Li+TBP           | 20.2  |
| Dynamical Evolution of the 2D/3D Interface: A Hidden Driver behind Perovskite Solar Cell Instability                                   | 2020 | TiO2     | mTiO2 | [(FAPbI <sub>3</sub> ) <sub>0.8</sub><br>7(MAPbBr <sub>3</sub> )<br>0.13]0.92(Cs<br>PbI <sub>3</sub> ) <sub>0.08</sub> -2-<br>TMAI | one-step | spin 2-3 | chlorobenzene | DMF+DMSO | Spiro-OMeTAD | Li+TBP+FK<br>209 | 19.97 |
| Dynamical Evolution of the 2D/3D Interface: A Hidden Driver behind Perovskite Solar Cell Instability                                   | 2020 | TiO2     | mTiO2 | [(FAPbI <sub>3</sub> ) <sub>0.8</sub><br>7(MAPbBr <sub>3</sub> )<br>0.13]0.92(Cs<br>PbI <sub>3</sub> ) <sub>0.08</sub> -3-<br>TMAI | one-step | spin 2-3 | chlorobenzene | DMF+DMSO | Spiro-OMeTAD | Li+TBP+FK<br>209 | 20.59 |
| Dynamical Evolution of the 2D/3D Interface: A Hidden Driver behind Perovskite Solar Cell Instability                                   | 2020 | TiO2     | mTiO2 | [(FAPbI <sub>3</sub> ) <sub>0.8</sub><br>7(MAPbBr <sub>3</sub> )<br>0.13]0.92(Cs<br>PbI <sub>3</sub> ) <sub>0.08</sub> -2-<br>TEAI | one-step | spin 2-3 | chlorobenzene | DMF+DMSO | Spiro-OMeTAD | Li+TBP+FK<br>209 | 19.42 |

|                                                                                                                                                                              |      |      |            |                                          |          |          |               |          |              |              |       |
|------------------------------------------------------------------------------------------------------------------------------------------------------------------------------|------|------|------------|------------------------------------------|----------|----------|---------------|----------|--------------|--------------|-------|
| Highly Efficient Perovskite Solar Cells Enabled by Multiple Ligand Passivation                                                                                               | 2020 | SnO2 | no         | PbI2,FAI,MA Br,MACI/ML                   | two-step | spin     | no            | DMF+DMSO | Spiro-OMeTAD | Li+TBP       | 20.9  |
| Highly Efficient Perovskite Solar Cells Enabled by Multiple Ligand Passivation                                                                                               | 2020 | SnO2 | no         | PbI2,FAI,MA Br,MACI                      | two-step | spin     | no            | DMF+DMSO | Spiro-OMeTAD | Li+TBP       | 18.4  |
| Optimization of CH3NH3PbI3 perovskite solar cells: A theoretical and experimental study                                                                                      | 2020 | TiO2 | mTiO2      | MAPbI3                                   | two-step | spin     | no            | DMF      | Spiro-OMeTAD | Li+TBP       | 20.26 |
| In-situ fabrication of P3HT passivating layer with hole extraction ability for enhanced performance of perovskite solar cell                                                 | 2020 | SnO2 | no         | Cs0.05(MA0.17FA0.83)0.95Pb(I0.83Br0.17)3 | one-step | spin 2-3 | chlorobenzene | DMF+DMSO | Spiro-OMeTAD | Li+TBP       | 20    |
| Structural Modification of Triphenylamine Derivatives vs the Minimization of Carrier Losses for Efficient Perovskite Solar Cells                                             | 2020 | TiO2 | mTiO2-SnO2 | Cs0.1(MA0.15FA0.85)Pb(I0.85Br)3          | one-step | spin 2-3 | chlorobenzene | DMF+DMSO | CS02         | Li+TBP+FK209 | 15.4  |
| Structural Modification of Triphenylamine Derivatives vs the Minimization of Carrier Losses for Efficient Perovskite Solar Cells                                             | 2020 | TiO2 | mTiO2-SnO2 | Cs0.1(MA0.15FA0.85)Pb(I0.85Br)3          | one-step | spin 2-3 | chlorobenzene | DMF+DMSO | CS05         | Li+TBP+FK209 | 18.05 |
| Structural Modification of Triphenylamine Derivatives vs the Minimization of Carrier Losses for Efficient Perovskite Solar Cells                                             | 2020 | TiO2 | mTiO2-SnO2 | Cs0.1(MA0.15FA0.85)Pb(I0.85Br)3          | one-step | spin 2-3 | chlorobenzene | DMF+DMSO | CS04         | Li+TBP+FK209 | 19.38 |
| Simultaneous Power Conversion Efficiency and Stability Enhancement of Cs2AgBiBr6 Lead-Free Inorganic Perovskite Solar Cell through Adopting a Multifunctional Dye Interlayer | 2020 | TiO2 | mTiO2      | Cs2AgBiBr6, N719                         | one-step | spin     | no            | DMSO     | Spiro-OMeTAD | Li+TBP       | 2.84  |

|                                                                                                                                           |      |      |            |                                            |          |          |               |          |              |              |       |
|-------------------------------------------------------------------------------------------------------------------------------------------|------|------|------------|--------------------------------------------|----------|----------|---------------|----------|--------------|--------------|-------|
| RbCs(MAFA)PbI3perovskite solar cell with 22.81% efficiency using the precise ions cascade regulation                                      | 2020 | NiOx | no         | RbxCsx(MA(1-2x)/2FA(1-2x)/2)               | one-step | spin 2-3 | chlorobenzene | DMF+DMSO | PCBM         | no           | 22.81 |
| Record-Efficiency Flexible Perovskite Solar Cell and Module Enabled by a Porous-Planar Structure as an Electron Transport Layer           | 2020 | SnO2 | porous-ZSO | (FAPbI3)0.95(MAPbBr3)0.05                  | one-step | spin 2-3 | diethyl ether | DMF+DMSO | Spiro-OMeTAD | Li+TBP+FK209 | 20.7  |
| Optimization of CH3NH3PbI3perovskite solar cells: A theoretical and experimental study                                                    | 2020 | TiO2 | mTiO2      | MAPbI3                                     | two-step | spin     | no            | DMF      | Spiro-OMeTAD | Li+TBP       | 20.26 |
| Self-augmented ion blocking of sandwiched 2D/1D/2D electrode for solution processed high efficiency semitransparent perovskite solar cell | 2020 | SnO2 | no         | KxCs0.05(FA0.85MA0.15)0.95Pb(I0.85Br0.15)3 | one-step | spin     | ethyl acetate | DMF+DMSO | Spiro-OMeTAD | Li+TBP+FK209 | 14.69 |
| Highly efficient, stable and hysteresis-less planar perovskite solar cell based on chemical bath treated Zn2SnO4 electron transport layer | 2020 | ZSO  | no         | Cs0.05(MA0.15FA0.85)0.95Pb(Br0.15I0.85)3   | one-step | spin 2-3 | chlorobenzene | DMF+DMSO | Spiro-OMeTAD | Li+TBP       | 21.3  |
| Water Assisted Formation of Highly Oriented CsPbI2Br Perovskite Films with Solar Cell Efficiency Exceeding 16%                            | 2020 | TiO2 | no         | CsPbI2Br                                   | one-step | spin 2-3 | IPA           | DMSO     | P3HT         | Li+TBP       | 16.47 |
| Precise Stress Control of Inorganic Perovskite Films for Carbon-Based Solar Cells with an Ultrahigh Voltage of 1.622 V                    | 2020 | SnO2 | no         | CsPbBr3                                    | two-step | spin     | no            | DMF      | no           | no           | 10.71 |



|                                                                                                                                                                     |      |                  |                   |                                                                         |          |          |               |          |                         |        |       |
|---------------------------------------------------------------------------------------------------------------------------------------------------------------------|------|------------------|-------------------|-------------------------------------------------------------------------|----------|----------|---------------|----------|-------------------------|--------|-------|
| Stabilization of Highly Efficient and Stable Phase-Pure FAPbI <sub>3</sub> Perovskite Solar Cells by Molecularly Tailored 2D-Overlayers                             | 2020 | TiO <sub>2</sub> | mTiO <sub>2</sub> | FAPbI <sub>3</sub> /IBAI                                                | one-step | spin 2-3 | chlorobenzene | DMF+DMSO | Spiro-OMeTAD            | Li+TBP | 22.7  |
| Efficient all-inorganic CsPbI <sub>2</sub> Br perovskite solar cell with carbon electrode by revealing crystallization kinetics and improving crystal quality       | 2020 | SnO <sub>2</sub> | no                | CsPbI <sub>2</sub> Br                                                   | one-step | spin     | ethyl acetate | DMF+DMSO | no                      | no     | 12.19 |
| Air-Stable Hybrid Perovskite Solar Cell by Sequential Vapor Deposition in a Single Reactor                                                                          | 2020 | TiO <sub>2</sub> | no                | MAPbI <sub>3</sub>                                                      | two-step | CVD      | no            | no       | Spiro-OMeTAD            | Li+TBP | 14.15 |
| Thin Film (< 200 nm) Perovskite Solar Cell with 18% Efficiency                                                                                                      | 2020 | SnO <sub>2</sub> | no                | s-EAPbI <sub>3</sub>                                                    | one-step | spin     | no            | DMF      | Spiro-OMeTAD            | Li+TBP | 18.1  |
| Bifunctional Effects of Trichloro(octyl)silane Modification on the Performance and Stability of a Perovskite Solar Cell via Microscopic Characterization Techniques | 2020 | SnO <sub>2</sub> | no                | PbI <sub>2</sub> ,PbBr <sub>2</sub> ,<br>MABr,FAI,Cs<br>I               | two-step | spin     | no            | DMF+DMSO | Spiro-OMeTAD            | Li+TBP | 20.03 |
| Dopant-free methoxy substituted copper(II) phthalocyanine for highly efficient and stable perovskite solar cells                                                    | 2020 | SnO <sub>2</sub> | no                | (FAPbI <sub>3</sub> ) <sub>0.8</sub><br>5(MAPbBr <sub>3</sub> )<br>0.15 | one-step | spin 2-3 | chlorobenzene | DMF+DMSO | CuPc-(OMe) <sub>8</sub> | Li+TBP | 18.3  |
| Interface Engineering of Air-Stable n-Doping FullereneModified TiO <sub>2</sub> Electron Transport Layer for Highly Efficient and Stable Perovskite Solar Cells     | 2020 | TiO <sub>2</sub> | PCBM              | MAPbI <sub>3</sub>                                                      | one-step | spin 2-3 | chlorobenzene | DMF+DMSO | Spiro-OMeTAD            | no     | 20.14 |

|                                                                                                                                                                      |      |                  |                                     |                                                                                                           |          |          |               |          |                                    |              |       |
|----------------------------------------------------------------------------------------------------------------------------------------------------------------------|------|------------------|-------------------------------------|-----------------------------------------------------------------------------------------------------------|----------|----------|---------------|----------|------------------------------------|--------------|-------|
| Planar Mg <sub>x</sub> Zn <sub>1-x</sub> O-based perovskite solar cell with superior ultraviolet light stability                                                     | 2020 | MZO              | no                                  | (Cs <sub>x</sub> FA <sub>1-x</sub> SnI <sub>3</sub> ) <sub>0.5</sub> (MAPbI <sub>3</sub> ) <sub>0.5</sub> | one-step | spin 2-3 | chlorobenzene | DMF+DMSO | PTAA                               | no           | 19.57 |
| Stable and High-Efficiency Methylammonium-Free Perovskite Solar Cells                                                                                                | 2020 | TiO <sub>2</sub> | mTiO <sub>2</sub> -SnO <sub>2</sub> | (Cs <sub>0.17</sub> FA <sub>0.83</sub> )Pb(I <sub>0.97</sub> Cl <sub>0.03</sub> ) <sub>3</sub>            | one-step | spin 2-3 | chlorobenzene | DMF+DMSO | Spiro-OMeTAD                       | Li+TBP+FK209 | 20.5  |
| Unraveling Doping Capability of Conjugated Polymers for Strategic Manipulation of Electric Dipole Layer toward Efficient Charge Collection in Perovskite Solar Cells | 2020 | TiO <sub>2</sub> | mTiO <sub>2</sub>                   | (FAPbI <sub>3</sub> ) <sub>0.95</sub> (MAPbBr <sub>3</sub> ) <sub>0.05</sub>                              | one-step | spin 2-3 | ethyl ether   | DMF+DMSO | PDIF-BT                            | no           | 20.21 |
| Cu <sub>2</sub> ZnSnS <sub>4</sub> as an efficient hole transporting material for low temperature paintable carbon electrode based perovskite solar cells            | 2020 | TiO <sub>2</sub> | mTiO <sub>2</sub>                   | MAPbI <sub>3</sub>                                                                                        | one-step | spin 2-3 | chlorobenzene | DMF+DMSO | Cu <sub>2</sub> ZnSnS <sub>4</sub> | no           | 12.53 |
| Air-processed carbon-based perovskite solar cells with enhanced efficiency and stability: Effect of temperature control and using CuSCN                              | 2020 | TiO <sub>2</sub> | mTiO <sub>2</sub>                   | FA <sub>0.83</sub> MA <sub>0.17</sub> PbI <sub>2</sub> Sn <sub>0.49</sub> Br <sub>0.51</sub>              | one-step | spin 2-3 | chlorobenzene | DMF+DMSO | CuSCN                              | no           | 14.87 |
| High-performance hole conductor-free perovskite solar cell using a carbon nanotube counter electrode                                                                 | 2020 | ZnO              | PEI                                 | MAPI <sub>3</sub>                                                                                         | one-step | spin     | ethyl ether   | DMF+DMSO | MWCNTs                             | no           | 15.56 |
| Indium doped CsPbI <sub>3</sub> films for inorganic perovskite solar cells with efficiency exceeding                                                                 | 2020 | TiO <sub>2</sub> | no                                  | InI <sub>3</sub> :CsPbI <sub>3</sub>                                                                      | one-step | spin     | no            | DMF      | Spiro-OMeTAD                       | Li+TBP       | 17.09 |

|                                                                                                                                                    |      |                     |       |                                                            |          |                  |               |              |              |        |       |  |
|----------------------------------------------------------------------------------------------------------------------------------------------------|------|---------------------|-------|------------------------------------------------------------|----------|------------------|---------------|--------------|--------------|--------|-------|--|
| 17%                                                                                                                                                |      |                     |       |                                                            |          |                  |               |              |              |        |       |  |
| Critical Assessment of the Use of Excess Lead Iodide in Lead Halide Perovskite Solar Cells                                                         | 2020 | TiO2                | mTiO2 | MAPbI3                                                     | one-step | spin             | no            | DMF+DMSO     | Spiro-OMeTAD | Li+TBP | 19.3  |  |
| A perovskite solar cell owing very high stabilities and power conversion efficiencies                                                              | 2020 | bathophenanthroline | no    | CsPbI3-[CsPbI3]0.04 [(MAPbBr3)0.15(FAPbI3)0.85]0.96-CsPbI3 | two-step | spin             | chlorobenzene | DMF+DMSO     | Spiro-OMeTAD | Li+TBP | 21.32 |  |
| Universal defects elimination for high performance thermally evaporated CsPbBr3 perovskite solar cells                                             | 2020 | TiO2                | no    | CsPbBr3                                                    | two-step | evaporation-spin | no            | no           | no           | no     | 9.35  |  |
| Tetrahydrofuran as Solvent for P3HT:F4-TCNQ Hole-Transporting Layer to Increase the Efficiency and Stability of FAPbI3-based Perovskite Solar Cell | 2020 | SnO2                | no    | (FAPbI3)0.875(CsPbBr3)0.125                                | one-step | spin             | diethyl ether | DMF+DMSO     | P3HT:F4-TCNQ | no     | 13.54 |  |
| An Efficient and Stable Perovskite Solar Cell with Suppressed Defects by Employing Dithizone as a Lead Indicator                                   | 2020 | SnO2                | no    | (Cs0.05FA0.54MA0.41Pb(I,Br)3)                              | two-step | spin             | no            | DMF+DMSO+IPA | Spiro-OMeTAD | Li+TBP | 20.36 |  |
| Improving the open-circuit voltage of Sn-based perovskite solar cells by band alignment at the electron transport layer/perovskite layer interface | 2020 | SnO2                | no    | (MA,FA)Pb(I,Br)3                                           | one-step | spin 2-3         | chlorobenzene | DMF+DMSO     | PTAA         | Li+TBP | 18    |  |

|                                                                                                                                                                     |      |                     |    |                  |          |          |               |          |              |        |       |
|---------------------------------------------------------------------------------------------------------------------------------------------------------------------|------|---------------------|----|------------------|----------|----------|---------------|----------|--------------|--------|-------|
| Improving the open-circuit voltage of Sn-based perovskite solar cells by band alignment at the electron transport layer/perovskite layer interface                  | 2020 | TiO2                | no | (MA,FA)Pb(I,Br)3 | one-step | spin 2-3 | chlorobenzene | DMF+DMSO | PTAA         | Li+TBP | 16.9  |
| Improving the open-circuit voltage of Sn-based perovskite solar cells by band alignment at the electron transport layer/perovskite layer interface                  | 2020 | Nb2O5               | no | (MA,FA)Pb(I,Br)3 | one-step | spin 2-3 | chlorobenzene | DMF+DMSO | PTAA         | Li+TBP | 15.1  |
| High-performance HTL-free perovskite solar cell: An efficient composition of ZnO NRs, RGO, and CuInS2QDs, as electron-transporting layer matrix                     | 2020 | ZnO-RGO5%-CuInS220% | no | MAPbI3           | two-step | spin     | no            | DMF+IPA  | no           | no     | 15.74 |
| Greatly enhanced power conversion efficiency of hole-transport-layer-free perovskite solar cell via coherent interfaces of perovskite and carbon layers             | 2020 | TiO2                | no | MAPbI3           | one-step | spin     | no            | DMF      | no           | no     | 14.1  |
| Implicit Tandem Organic-Inorganic Hybrid Perovskite Solar Cells Based on Internal Dye Sensitization: Robotized Screening, Synthesis, Device Implementation, and ... | 2020 | TiO2                | no | CsPbI3-Mn        | one-step | spin     | no            | DMF+DMSO | PTAA         | Li+TBP | 16.52 |
| Highly electroluminescent and stable inorganic CsPbI2Br perovskite solar cell enabled by balanced charge transfer                                                   | 2020 | SnO2:C60-EDA        | no | CsPbI2Br-5-AVABr | one-step | spin 2-3 | ethyl acetate | DMSO+IPA | Spiro-OMeTAD | Li+TBP | 16.58 |
| Highly electroluminescent and stable inorganic CsPbI2Br perovskite solar                                                                                            | 2020 | SnO2:C70-EDA        | no | CsPbI2Br-5-AVABr | one-step | spin 2-3 | ethyl acetate | DMSO+IPA | Spiro-OMeTAD | Li+TBP | 15.66 |

|                                                                                                                                                |      |               |       |                                                |          |          |               |          |              |               |       |  |
|------------------------------------------------------------------------------------------------------------------------------------------------|------|---------------|-------|------------------------------------------------|----------|----------|---------------|----------|--------------|---------------|-------|--|
| cell enabled by balanced charge transfer                                                                                                       |      |               |       |                                                |          |          |               |          |              |               |       |  |
| Investigating the effects of carbon-based counter electrode layers on the efficiency of hole-transporter-free perovskite solar cells           | 2020 | TiO2          | mTiO2 | MAPbI3                                         | one-step | spin     | no            | DMF      | no           | no            | 4.25  |  |
| Hysteresis-less and stable perovskite solar cells with a self-assembled monolayer                                                              | 2020 | SnO2-CPTA-SAM | no    | CsFAMA                                         | one-step | spin 2-3 | chlorobenzene | DMF+DMSO | Spiro-OMeTAD | Li+TBP+FK 209 | 17.7  |  |
| Benzodithiophene-Thienopyrroledione-Thienothiophene-based Random Copolymeric Hole Transporting Material for Perovskite Solar Cell              | 2020 | TiO2-Cl       | mTiO2 | Cs0.05((MA 0.15FA0.85)(0.95)Pb(10.8 5Br0.15)3, | one-step | spin 2-3 | chlorobenzene | DMF+DMSO | RCP-BTT      | Li+TBP        | 14.57 |  |
| Benzodithiophene-Thienopyrroledione-Thienothiophene-based Random Copolymeric Hole Transporting Material for Perovskite Solar Cell              | 2020 | TiO2-Cl       | mTiO2 | Cs0.05((MA 0.15FA0.85)(0.95)Pb(10.8 5Br0.15)3, | one-step | spin 2-3 | chlorobenzene | DMF+DMSO | PTB7         | Li+TBP        | 12.02 |  |
| Benzodithiophene-Thienopyrroledione-Thienothiophene-based Random Copolymeric Hole Transporting Material for Perovskite Solar Cell              | 2020 | TiO2-Cl       | mTiO2 | Cs0.05((MA 0.15FA0.85)(0.95)Pb(10.8 5Br0.15)3, | one-step | spin 2-3 | chlorobenzene | DMF+DMSO | Spiro-OMeTAD | Li+TBP        | 19.17 |  |
| Critical role of interface contact modulation in realizing low-temperature fabrication of efficient and stable CsPbI2Br2perovskite solar cells | 2020 | SnO2          | no    | CsPbI2Br2                                      | one-step | spin 2-3 | no            | DMSO     | Spiro-OMeTAD | Li+TBP+FK 209 | 10.81 |  |

|                                                                                                                                                                                  |      |                  |                   |                                                                                           |          |          |               |          |                         |               |       |
|----------------------------------------------------------------------------------------------------------------------------------------------------------------------------------|------|------------------|-------------------|-------------------------------------------------------------------------------------------|----------|----------|---------------|----------|-------------------------|---------------|-------|
| Critical role of interface contact modulation in realizing low-temperature fabrication of efficient and stable CsPbI <sub>2</sub> Br <sub>2</sub> perovskite solar cells         | 2020 | ZnO              | no                | CsPbI <sub>2</sub> Br <sub>2</sub>                                                        | one-step | spin 2-3 | no            | DMSO     | Spiro-OMeTAD            | Li+TBP+FK 209 | 9.7   |
| Dual Effective Dopant Based Hole Transport Layer for Stable and Efficient Perovskite Solar Cells                                                                                 | 2020 | TiO <sub>2</sub> | mTiO <sub>2</sub> | PbI <sub>2</sub> ,FAI,MA Br,PbBr <sub>2</sub>                                             | one-step | spin 2-3 | chlorobenzene | DMF+DMSO | Spiro-OMeTAD            | Li+PFPPY      | 21.38 |
| Dual Effective Dopant Based Hole Transport Layer for Stable and Efficient Perovskite Solar Cells                                                                                 | 2020 | TiO <sub>2</sub> | mTiO <sub>2</sub> | PbI <sub>2</sub> ,FAI,MA Br,PbBr <sub>2</sub>                                             | one-step | spin 2-3 | chlorobenzene | DMF+DMSO | Spiro-OMeTAD            | Li+TBP+FK 209 | 19.69 |
| Vacuum-Assisted Growth of Low-Bandgap Thin Films (FA <sub>0.8</sub> MA <sub>0.2</sub> Sn <sub>0.5</sub> Pb <sub>0.5</sub> I <sub>3</sub> ) for All-Perovskite Tandem Solar Cells | 2020 | SnO <sub>2</sub> | no                | (FA <sub>0.8</sub> MA <sub>0.2</sub> Sn <sub>0.5</sub> Pb <sub>0.5</sub> I <sub>3</sub> ) | one-step | spin 2-3 | chlorobenzene | DMF+DMSO | Spiro-OMeTAD            | Li+TBP        | 23    |
| Improve the Oxide/Perovskite Heterojunction Contact for Low Temperature High Efficiency and Stable All-inorganic CsPbI <sub>2</sub> Br Perovskite Solar Cells                    | 2020 | ZnO              | no                | CsPbI <sub>2</sub> Br                                                                     | one-step | spin     | no            | DMSO     | Spiro-OMeTAD            | Li+TBP+FK 209 | 14.78 |
| Improve the Oxide/Perovskite Heterojunction Contact for Low Temperature High Efficiency and Stable All-inorganic CsPbI <sub>2</sub> Br Perovskite Solar Cells                    | 2020 | SnO <sub>2</sub> | no                | CsPbI <sub>2</sub> Br                                                                     | one-step | spin     | no            | DMSO     | Spiro-OMeTAD            | Li+TBP+FK 209 | 12.3  |
| Alkyl Chain Regulated Charge Transfer in Fluorescent Inorganic CsPbBr <sub>3</sub> Perovskite Solar Cells                                                                        | 2020 | TiO <sub>2</sub> | mTiO <sub>2</sub> | CsPbBr <sub>3</sub>                                                                       | two-step | spin     | no            | DMF      | CuInS <sub>2</sub> /ZnS | no            | 10.85 |

|                                                                                                                                                           |      |                      |                   |                                                                                                                                                  |          |          |               |          |                                                |        |       |
|-----------------------------------------------------------------------------------------------------------------------------------------------------------|------|----------------------|-------------------|--------------------------------------------------------------------------------------------------------------------------------------------------|----------|----------|---------------|----------|------------------------------------------------|--------|-------|
| Effective carbon composite electrode for low-cost perovskite solar cell with inorganic $\text{CuIn}_{0.75}\text{Ga}_{0.25}\text{S}_2$ HTM                 | 2020 | TiO <sub>2</sub>     | no                | Cs <sub>0.05</sub> (MA <sub>0.17</sub> FA <sub>0.83</sub> ) <sub>0.95</sub> Pb <sub>3</sub> (I <sub>0.83</sub> Br <sub>0.17</sub> ) <sub>3</sub> | one-step | spin 2-3 | chlorobenzene | DMF+DMSO | $\text{CuIn}_{0.75}\text{Ga}_{0.25}\text{S}_2$ | no     | 16.3  |
| Effect of the hole transporting / active layer interface on the perovskite solar cell stability                                                           | 2020 | SnO <sub>2</sub>     | no                | MAPbI <sub>3</sub> -xCl <sub>x</sub>                                                                                                             | one-step | spin     | no            | DMF      | PTAA                                           | no     | 12.6  |
| Effect of the hole transporting / active layer interface on the perovskite solar cell stability                                                           | 2020 | SnO <sub>2</sub>     | no                | MAPbI <sub>3</sub> -xCl <sub>x</sub>                                                                                                             | one-step | spin     | no            | DMF      | P3HT                                           | no     | 11.2  |
| Moisture-Resistant FAPbI <sub>3</sub> Perovskite Solar Cell with 22.25% Power Conversion Efficiency through Pentafluorobenzyl Phosphonic Acid Passivation | 2020 | TiO <sub>2</sub>     | mTiO <sub>2</sub> | FAPbI <sub>3</sub> /PFBPA                                                                                                                        | one-step | spin 2-3 | chlorobenzene | DMF+DMSO | Spiro-OMeTAD                                   | Li+TBP | 22.25 |
| Moisture-Resistant FAPbI <sub>3</sub> Perovskite Solar Cell with 22.25% Power Conversion Efficiency through Pentafluorobenzyl Phosphonic Acid Passivation | 2020 | TiO <sub>2</sub>     | mTiO <sub>2</sub> | FAPbI <sub>3</sub>                                                                                                                               | one-step | spin 2-3 | chlorobenzene | DMF+DMSO | Spiro-OMeTAD                                   | Li+TBP | 20.19 |
| Chlorine-modified SnO <sub>2</sub> electron transport layer for high-efficiency perovskite solar cells                                                    | 2020 | SnO <sub>2</sub> -Cl | no                | FAI,PbI <sub>2</sub> ,CsI, MABr,PbBr <sub>2</sub>                                                                                                | one-step | spin     | anisole       | DMF+DMSO | Spiro-OMeTAD                                   | Li+TBP | 17.01 |
| Chlorine-modified SnO <sub>2</sub> electron transport layer for high-efficiency perovskite solar cells                                                    | 2020 | SnO <sub>2</sub>     | no                | FAI,PbI <sub>2</sub> ,CsI, MABr,PbBr <sub>2</sub>                                                                                                | one-step | spin     | anisole       | DMF+DMSO | Spiro-OMeTAD                                   | Li+TBP | 17.81 |
| Combustion Procedure Deposited SnO <sub>2</sub> Electron Transport Layers for High Efficient                                                              | 2020 | s-SnO <sub>2</sub>   | no                | Cs <sub>0.05</sub> (MA <sub>0.17</sub> FA <sub>0.83</sub> )                                                                                      | one-step | spin 2-3 | chlorobenzene | DMF+DMSO | PCBM                                           | no     | 15.29 |

|                                                                                                                                                                    |      |         |                 |                                                                 |          |          |               |          |              |                      |       |
|--------------------------------------------------------------------------------------------------------------------------------------------------------------------|------|---------|-----------------|-----------------------------------------------------------------|----------|----------|---------------|----------|--------------|----------------------|-------|
| Perovskite Solar Cells                                                                                                                                             |      |         |                 | )0.95 Pb(I<br>0.83 Br 0.17<br>)3                                |          |          |               |          |              |                      |       |
| Combustion Procedure Deposited SnO2<br>Electron Transport Layers for High Efficient<br>Perovskite Solar Cells                                                      | 2020 | c-SnO2  | no              | Cs 0.05 (MA<br>0.17 FA 0.83<br>)0.95 Pb(I<br>0.83 Br 0.17<br>)3 | one-step | spin 2-3 | chlorobenzene | DMF+DMSO | PCBM         | no                   | 19.12 |
| Combustion Procedure Deposited SnO2<br>Electron Transport Layers for High Efficient<br>Perovskite Solar Cells                                                      | 2020 | Nd-SnO2 | no              | Cs 0.05 (MA<br>0.17 FA 0.83<br>)0.95 Pb(I<br>0.83 Br 0.17<br>)3 | one-step | spin 2-3 | chlorobenzene | DMF+DMSO | PCBM         | no                   | 20.92 |
| Introduction of Multifunctional Triphenylamino<br>Derivatives at the Perovskite/<br>HTL Interface to Promote Efficiency and<br>Stability of Perovskite Solar Cells | 2020 | SnO2-Cl | no              | FAPbI3                                                          | two-step | spin     | no            | DMF+DMSO | Spiro-OMeTAD | Li+TBP               | 16.69 |
| Introduction of Multifunctional Triphenylamino<br>Derivatives at the Perovskite/<br>HTL Interface to Promote Efficiency and<br>Stability of Perovskite Solar Cells | 2020 | SnO2-Cl | no              | FAPbI3                                                          | two-step | spin     | no            | DMF+DMSO | Spiro-OMeTAD | Li+TBP+TP<br>A-EABr  | 17.4  |
| Introduction of Multifunctional Triphenylamino<br>Derivatives at the Perovskite/<br>HTL Interface to Promote Efficiency and<br>Stability of Perovskite Solar Cells | 2020 | SnO2-Cl | no              | FAPbI3                                                          | two-step | spin     | no            | DMF+DMSO | Spiro-OMeTAD | Li+TBP+TP<br>A-PEABr | 18.15 |
| A highly stable hole-conductor-free CsxMA1-<br>xPbI3perovskite solar cell                                                                                          | 2020 | TiO2    | mTiO2-<br>mZrO2 | CsxMA1-<br>xPbI3                                                | one-step | spin 2-3 | no            | DMF+DMSO | no           | no                   | 10.57 |



|                                                                                                                                     |      |      |             |                       |          |          |               |          |              |    |       |  |
|-------------------------------------------------------------------------------------------------------------------------------------|------|------|-------------|-----------------------|----------|----------|---------------|----------|--------------|----|-------|--|
| based on carbon counter electrode                                                                                                   |      |      |             |                       |          |          |               |          |              |    |       |  |
| Performance of low-cost mixed cationic carbon-based solar cells prepared through compositional engineering under ambient conditions | 2020 | TiO2 | mTiO2-mZrO2 | FA0.55MA0.25Cs0.2PbI3 | one-step | spin 2-3 | chlorobenzene | DMF+DMSO | no           | no | 9.56  |  |
| Performance of low-cost mixed cationic carbon-based solar cells prepared through compositional engineering under ambient conditions | 2020 | TiO2 | mTiO2-mZrO2 | FA0.55MA0.25Cs0.2PbI3 | one-step | spin 2-3 | chlorobenzene | DMF+DMSO | P3HT         | no | 8.56  |  |
| Performance of low-cost mixed cationic carbon-based solar cells prepared through compositional engineering under ambient conditions | 2020 | TiO2 | mTiO2-mZrO2 | FA0.55MA0.25Cs0.2PbI3 | one-step | spin 2-3 | chlorobenzene | DMF+DMSO | Spiro-OMeTAD | no | 13.41 |  |
| Solvent selection for highly reproducible carbon-based mixed-cation hybrid lead halide perovskite solar cells via adduct approach   | 2020 | TiO2 | mTiO2-mZrO2 | Cs0.1FA0.9PbI3        | one-step | drip     | no            | DMSO     | no           | no | 12.33 |  |
| Solvent selection for highly reproducible carbon-based mixed-cation hybrid lead halide perovskite solar cells via adduct approach   | 2020 | TiO2 | mTiO2-mZrO2 | Cs0.1FA0.9PbI3        | one-step | drip     | no            | DMF+DMSO | no           | no | 10.06 |  |
| Solvent selection for highly reproducible carbon-based mixed-cation hybrid lead halide perovskite solar cells via adduct approach   | 2020 | TiO2 | mTiO2-mZrO2 | Cs0.1FA0.9PbI3        | one-step | drip     | no            | DMF      | no           | no | 8.07  |  |

|                                                                                                                                   |      |         |             |                               |          |          |               |                  |              |                  |       |
|-----------------------------------------------------------------------------------------------------------------------------------|------|---------|-------------|-------------------------------|----------|----------|---------------|------------------|--------------|------------------|-------|
| Solvent selection for highly reproducible carbon-based mixed-cation hybrid lead halide perovskite solar cells via adduct approach | 2020 | TiO2    | mTiO2-mZrO2 | Cs0.1FA0.9PbI3                | one-step | drip     | no            | DMSO+GBL         | no           | no               | 4.62  |
| Paradoxical Approach with a Hydrophilic Passivation Layer for Moisture-Stable, 23% Efficient Perovskite Solar Cells               | 2020 | SnO2    | no          | FAPbI3                        | one-step | spin     | diethyl ether | DMF+NMP          | Spiro-OMeTAD | Li+TBP           | 21.54 |
| Paradoxical Approach with a Hydrophilic Passivation Layer for Moisture-Stable, 23% Efficient Perovskite Solar Cells               | 2020 | SnO2    | no          | FAPbI3+4AB<br>I               | one-step | spin     | diethyl ether | DMF+NMP          | Spiro-OMeTAD | Li+TBP           | 23.25 |
| Paradoxical Approach with a Hydrophilic Passivation Layer for Moisture-Stable, 23% Efficient Perovskite Solar Cells               | 2020 | SnO2    | no          | FAPbI3+2AE<br>I               | one-step | spin     | diethyl ether | DMF+NMP          | Spiro-OMeTAD | Li+TBP           | 22.75 |
| Multifunctional Enhancement for Highly Stable and Efficient Perovskite Solar Cells                                                | 2020 | TiO2    | no          | FA0.85MA0.15PbI3              | one-step | spin 2-3 | chlorobenzene | DMF+NMP          | Spiro-OMeTAD | Li+TBP           | 22.21 |
| Thiocyanate assisted nucleation for high performance mix-cation perovskite solar cells with improved stability                    | 2020 | Bi-SnO2 | no          | FA0.4MA0.6PbI2.8-xBr0.2(SCN)x | one-step | spin     | no            | DMF              | Spiro-OMeTAD | Li+TBP+FK<br>209 | 19.64 |
| Thiocyanate assisted nucleation for high performance mix-cation perovskite solar cells with improved stability                    | 2020 | Bi-SnO2 | no          | FA0.4MA0.6PbI2.8Br0.2         | one-step | spin     | no            | DMF              | Spiro-OMeTAD | Li+TBP+FK<br>209 | 17.13 |
| Inhibited aggregation of lithium salt in spiro-OMeTAD toward highly efficient perovskite solar cells                              | 2020 | TiO2    | mTiO2       | PbI2,FAI,MA<br>Br             | two-step | spin     | no            | DMF+DMSO<br>+IPA | Spiro-OMeTAD | Li+TBP           | 17.6  |

|                                                                                                                                                           |      |      |       |                                            |          |          |                        |               |              |             |       |
|-----------------------------------------------------------------------------------------------------------------------------------------------------------|------|------|-------|--------------------------------------------|----------|----------|------------------------|---------------|--------------|-------------|-------|
| Inhibited aggregation of lithium salt in spiro-OMeTAD toward highly efficient perovskite solar cells                                                      | 2020 | TiO2 | mTiO2 | PbI2,FAI,MA Br                             | two-step | spin     | no                     | DMF+DMSO +IPA | Spiro-OMeTAD | Li+TBP+PbI2 | 20.3  |
| Efficient defect-passivation and charge-transfer with interfacial organophosphorus ligand modification for enhanced performance of perovskite solar cells | 2020 | TiO2 | mTiO2 | Cs0.05FA0.7<br>9MA0.16Pb(I<br>0.83Br0.17)3 | one-step | spin 2-3 | chlorobenzene          | DMF+DMSO      | Spiro-OMeTAD | Li+TBP      | 17.24 |
| Efficient defect-passivation and charge-transfer with interfacial organophosphorus ligand modification for enhanced performance of perovskite solar cells | 2020 | TiO2 | mTiO2 | Cs0.05FA0.7<br>9MA0.16Pb(I<br>0.83Br0.17)3 | one-step | spin 2-3 | chlorobenzene<br>+TOPO | DMF+DMSO      | Spiro-OMeTAD | Li+TBP      | 16.85 |
| Efficient defect-passivation and charge-transfer with interfacial organophosphorus ligand modification for enhanced performance of perovskite solar cells | 2020 | TiO2 | mTiO2 | Cs0.05FA0.7<br>9MA0.16Pb(I<br>0.83Br0.17)3 | one-step | spin 2-3 | chlorobenzene<br>+TPPO | DMF+DMSO      | Spiro-OMeTAD | Li+TBP      | 18.29 |
| Dual-Protection Strategy for High-Efficiency and Stable CsPbI2Br Inorganic Perovskite Solar Cells                                                         | 2020 | SnO2 | no    | CsPbI2Br                                   | one-step | spin     | no                     | DMF+DMSO      | Spiro-OMeTAD | Li+TBP      | 12.17 |
| Dual-Protection Strategy for High-Efficiency and Stable CsPbI2Br Inorganic Perovskite Solar Cells                                                         | 2020 | SnO2 | no    | BTSTh<br>CsPbI2Br                          | one-step | spin     | no                     | DMF+DMSO      | Spiro-OMeTAD | Li+TBP      | 15.58 |
| Dual-Protection Strategy for High-Efficiency and Stable CsPbI2Br Inorganic Perovskite Solar Cells                                                         | 2020 | SnO2 | no    | STh<br>CsPbI2Br                            | one-step | spin     | no                     | DMF+DMSO      | Spiro-OMeTAD | Li+TBP      | 14.04 |
| Dual-Protection Strategy for High-Efficiency and Stable CsPbI2Br Inorganic Perovskite Solar Cells                                                         | 2020 | SnO2 | no    | BT CsPbI2Br                                | one-step | spin     | no                     | DMF+DMSO      | Spiro-OMeTAD | Li+TBP      | 13.87 |

|                                                                                                                  |      |          |      |        |          |          |               |          |              |                  |       |
|------------------------------------------------------------------------------------------------------------------|------|----------|------|--------|----------|----------|---------------|----------|--------------|------------------|-------|
| Effect of oxygen vacancies in the electron transfer layer SiZnSnO on the performance of perovskite solar cells   | 2020 | Si-ZnSnO | no   | MAPbI3 | one-step | spin 2-3 | chlorobenzene | DMF+DMSO | Spiro-OMeTAD | Li+TBP+FK<br>209 | 13.4  |
| Mesostructured perovskite solar cells based on Zn2SnO4 Single Crystal Mesoporous Layer with efficiency of 18.32% | 2020 | ZnO      | no   | MAPbI3 | one-step | spin 2-3 | chlorobenzene | DMF+DMSO | Spiro-OMeTAD | Li+TBP+FK<br>209 | 10.77 |
| Mesostructured perovskite solar cells based on Zn2SnO4 Single Crystal Mesoporous Layer with efficiency of 18.32% | 2020 | SnO2     | no   | MAPbI3 | one-step | spin 2-3 | chlorobenzene | DMF+DMSO | Spiro-OMeTAD | Li+TBP+FK<br>209 | 16.9  |
| Mesostructured perovskite solar cells based on Zn2SnO4 Single Crystal Mesoporous Layer with efficiency of 18.32% | 2020 | Zn2SnO4  | no   | MAPbI3 | one-step | spin 2-3 | chlorobenzene | DMF+DMSO | Spiro-OMeTAD | Li+TBP+FK<br>209 | 14.34 |
| Mesostructured perovskite solar cells based on Zn2SnO4 Single Crystal Mesoporous Layer with efficiency of 18.32% | 2020 | ZnSnO3   | no   | MAPbI3 | one-step | spin 2-3 | chlorobenzene | DMF+DMSO | Spiro-OMeTAD | Li+TBP+FK<br>209 | 16.41 |
| Mesostructured perovskite solar cells based on Zn2SnO4 Single Crystal Mesoporous Layer with efficiency of 18.32% | 2020 | Zn2Sn3O8 | no   | MAPbI3 | one-step | spin 2-3 | chlorobenzene | DMF+DMSO | Spiro-OMeTAD | Li+TBP+FK<br>209 | 16    |
| Mesostructured perovskite solar cells based on Zn2SnO4 Single Crystal Mesoporous Layer with efficiency of 18.32% | 2020 | ZnO      | SnO2 | MAPbI3 | one-step | spin 2-3 | chlorobenzene | DMF+DMSO | Spiro-OMeTAD | Li+TBP+FK<br>209 | 17.54 |
| Mesostructured perovskite solar cells based on Zn2SnO4 Single Crystal Mesoporous Layer with efficiency of 18.32% | 2020 | Zn2SnO4  | SnO2 | MAPbI3 | one-step | spin 2-3 | chlorobenzene | DMF+DMSO | Spiro-OMeTAD | Li+TBP+FK<br>209 | 18.32 |
| Mesostructured perovskite solar cells based on Zn2SnO4 Single Crystal Mesoporous Layer with efficiency of 18.32% | 2020 | ZnSnO3   | SnO2 | MAPbI3 | one-step | spin 2-3 | chlorobenzene | DMF+DMSO | Spiro-OMeTAD | Li+TBP+FK<br>209 | 19.01 |

|                                                                                                                                           |      |                                                |                  |                    |          |          |               |          |              |               |      |
|-------------------------------------------------------------------------------------------------------------------------------------------|------|------------------------------------------------|------------------|--------------------|----------|----------|---------------|----------|--------------|---------------|------|
| Mesostructured perovskite solar cells based on Zn <sub>2</sub> SnO <sub>4</sub> Single Crystal Mesoporous Layer with efficiency of 18.32% | 2020 | Zn <sub>2</sub> Sn <sub>3</sub> O <sub>8</sub> | SnO <sub>2</sub> | MAPbI <sub>3</sub> | one-step | spin 2-3 | chlorobenzene | DMF+DMSO | Spiro-OMeTAD | Li+TBP+FK 209 | 18.1 |
| Chlorinated Fullerene Dimers for Interfacial Engineering<br>Toward Stable Planar Perovskite Solar Cells with 22.3% Efficiency             | 2020 | TiO <sub>2</sub>                               | no               | MAPbI <sub>3</sub> | one-step | spin 2-3 | no            | DMF+DMSO | Spiro-OMeTAD | Li+TBP        | 18.4 |
| Chlorinated Fullerene Dimers for Interfacial Engineering<br>Toward Stable Planar Perovskite Solar Cells with 22.3% Efficiency             | 2020 | TiO <sub>2</sub>                               | PCBM             | MAPbI <sub>3</sub> | one-step | spin 2-3 | no            | DMF+DMSO | Spiro-OMeTAD | Li+TBP        | 17.9 |
| Chlorinated Fullerene Dimers for Interfacial Engineering<br>Toward Stable Planar Perovskite Solar Cells with 22.3% Efficiency             | 2020 | TiO <sub>2</sub>                               | NMBF-Cl dimer    | MAPbI <sub>3</sub> | one-step | spin 2-3 | no            | DMF+DMSO | Spiro-OMeTAD | Li+TBP        | 19.9 |
| Chlorinated Fullerene Dimers for Interfacial Engineering<br>Toward Stable Planar Perovskite Solar Cells with 22.3% Efficiency             | 2020 | TiO <sub>2</sub>                               | NMBF-H dimer     | MAPbI <sub>3</sub> | one-step | spin 2-3 | no            | DMF+DMSO | Spiro-OMeTAD | Li+TBP        | 19   |
| Chlorinated Fullerene Dimers for Interfacial Engineering<br>Toward Stable Planar Perovskite Solar Cells with 22.3%                        | 2020 | TiO <sub>2</sub>                               | NMBF-Cl          | MAPbI <sub>3</sub> | one-step | spin 2-3 | no            | DMF+DMSO | Spiro-OMeTAD | Li+TBP        | 17.6 |

|                                                                                                                               |      |      |               |                       |          |          |    |              |              |        |      |  |
|-------------------------------------------------------------------------------------------------------------------------------|------|------|---------------|-----------------------|----------|----------|----|--------------|--------------|--------|------|--|
| Efficiency                                                                                                                    |      |      |               |                       |          |          |    |              |              |        |      |  |
| Chlorinated Fullerene Dimers for Interfacial Engineering<br>Toward Stable Planar Perovskite Solar Cells with 22.3% Efficiency | 2020 | TiO2 | NMBF-H        | MAPbI3                | one-step | spin 2-3 | no | DMF+DMSO     | Spiro-OMeTAD | Li+TBP | 16.9 |  |
| Chlorinated Fullerene Dimers for Interfacial Engineering<br>Toward Stable Planar Perovskite Solar Cells with 22.3% Efficiency | 2020 | SnO2 | no            | (FAPbI3)x(MAPbBr3)1-x | two-step | spin     | no | DMF+DMSO+IPA | Spiro-OMeTAD | Li+TBP | 21.4 |  |
| Chlorinated Fullerene Dimers for Interfacial Engineering<br>Toward Stable Planar Perovskite Solar Cells with 22.3% Efficiency | 2020 | SnO2 | PCBM          | (FAPbI3)x(MAPbBr3)1-x | two-step | spin     | no | DMF+DMSO+IPA | Spiro-OMeTAD | Li+TBP | 20.8 |  |
| Chlorinated Fullerene Dimers for Interfacial Engineering<br>Toward Stable Planar Perovskite Solar Cells with 22.3% Efficiency | 2020 | SnO2 | NMBF-Cl dimer | (FAPbI3)x(MAPbBr3)1-x | two-step | spin     | no | DMF+DMSO+IPA | Spiro-OMeTAD | Li+TBP | 22.3 |  |
| Chlorinated Fullerene Dimers for Interfacial Engineering<br>Toward Stable Planar Perovskite Solar Cells with 22.3% Efficiency | 2020 | SnO2 | NMBF-H dimer  | (FAPbI3)x(MAPbBr3)1-x | two-step | spin     | no | DMF+DMSO+IPA | Spiro-OMeTAD | Li+TBP | 21.3 |  |

|                                                                                                                                     |      |      |         |                                       |          |          |               |              |              |        |       |
|-------------------------------------------------------------------------------------------------------------------------------------|------|------|---------|---------------------------------------|----------|----------|---------------|--------------|--------------|--------|-------|
| Chlorinated Fullerene Dimers for Interfacial Engineering<br>Toward Stable Planar Perovskite Solar Cells with 22.3% Efficiency       | 2020 | SnO2 | NMBF-Cl | (FAPbI3)x(MAPbBr3)1-x                 | two-step | spin     | no            | DMF+DMSO+IPA | Spiro-OMeTAD | Li+TBP | 20.7  |
| Chlorinated Fullerene Dimers for Interfacial Engineering<br>Toward Stable Planar Perovskite Solar Cells with 22.3% Efficiency       | 2020 | SnO2 | NMBF-H  | (FAPbI3)x(MAPbBr3)1-x                 | two-step | spin     | no            | DMF+DMSO+IPA | Spiro-OMeTAD | Li+TBP | 18.9  |
| Multifunctional Phosphorus-Containing Lewis Acid and Base Passivation Enabling Efficient and Moisture-Stable Perovskite Solar Cells | 2020 | SnO2 | no      | Cs0.05FA0.8MA0.15Pb(0.83Br0.17)3      | one-step | spin 2-3 | chlorobenzene | DMF+DMSO     | Spiro-OMeTAD | Li+TBP | 18.05 |
| Multifunctional Phosphorus-Containing Lewis Acid and Base Passivation Enabling Efficient and Moisture-Stable Perovskite Solar Cells | 2020 | SnO2 | no      | Cs0.05FA0.8MA0.15Pb(0.83Br0.17)3-TPPO | one-step | spin 2-3 | chlorobenzene | DMF+DMSO     | Spiro-OMeTAD | Li+TBP | 19.1  |
| Multifunctional Phosphorus-Containing Lewis Acid and Base Passivation Enabling Efficient and Moisture-Stable Perovskite Solar Cells | 2020 | SnO2 | no      | Cs0.05FA0.8MA0.15Pb(0.83Br0.17)3-TMPP | one-step | spin 2-3 | chlorobenzene | DMF+DMSO     | Spiro-OMeTAD | Li+TBP | 19.13 |
| Multifunctional Phosphorus-Containing Lewis Acid and                                                                                | 2020 | SnO2 | no      | Cs0.05FA0.8MA0.15Pb(0.83Br0.17)3      | one-step | spin 2-3 | chlorobenzene | DMF+DMSO     | Spiro-OMeTAD | Li+TBP | 21.04 |

|                                                                                                                         |      |         |     |                                               |          |      |               |          |              |               |       |  |
|-------------------------------------------------------------------------------------------------------------------------|------|---------|-----|-----------------------------------------------|----------|------|---------------|----------|--------------|---------------|-------|--|
| Base Passivation Enabling Efficient and Moisture-Stable Perovskite Solar Cells                                          |      |         |     | .83Br0.17)3-TPFP                              |          |      |               |          |              |               |       |  |
| Graded 2D/3D Perovskite Heterostructure for Efficient and Operationally Stable MA-Free Perovskite Solar Cells           | 2020 | SnO2    | ZnO | FA0.95Cs0.05PbI3                              | one-step | spin | chlorobenzene | DMF+DMSO | Spiro-OMeTAD | Li+TBP+FK 209 | 19.1  |  |
| Graded 2D/3D Perovskite Heterostructure for Efficient and Operationally Stable MA-Free Perovskite Solar Cells           | 2020 | SnO2    | ZnO | FA0.95Cs0.05PbI3-β-GUA                        | one-step | spin | chlorobenzene | DMF+DMSO | Spiro-OMeTAD | Li+TBP+FK 209 | 22.2  |  |
| Graded 2D/3D Perovskite Heterostructure for Efficient and Operationally Stable MA-Free Perovskite Solar Cells           | 2020 | SnO2    | ZnO | FA0.95Cs0.05PbI3-5-AVAI                       | one-step | spin | chlorobenzene | DMF+DMSO | Spiro-OMeTAD | Li+TBP+FK 209 | 9     |  |
| Graded 2D/3D Perovskite Heterostructure for Efficient and Operationally Stable MA-Free Perovskite Solar Cells           | 2020 | SnO2    | ZnO | FA0.95Cs0.05PbI3-GAI                          | one-step | spin | chlorobenzene | DMF+DMSO | Spiro-OMeTAD | Li+TBP+FK 209 | 20.02 |  |
| Grain Boundary and Interface Passivation with Core-Shell Au@ CdS Nanospheres for High-Efficiency Perovskite Solar Cells | 2020 | SnO2 QD | no  | (CsI)0.04(FAI)0.82(PbI2)0.86(MAPbBr3)0.14     | one-step | spin | chlorobenzene | DMF+DMSO | Spiro-OMeTAD | Li+TBP        | 17.71 |  |
| Grain Boundary and Interface Passivation with Core-Shell Au@ CdS Nanospheres for High-Efficiency Perovskite Solar Cells | 2020 | SnO2 QD | no  | (CsI)0.04(FAI)0.82(PbI2)0.86(MAPbBr3)0.14(Au@ | one-step | spin | chlorobenzene | DMF+DMSO | Spiro-OMeTAD | Li+TBP        | 21.38 |  |



|                                                                                                                                                                                 |      |                  |    |                                             |          |          |               |          |              |        |      |
|---------------------------------------------------------------------------------------------------------------------------------------------------------------------------------|------|------------------|----|---------------------------------------------|----------|----------|---------------|----------|--------------|--------|------|
|                                                                                                                                                                                 |      |                  |    | CdS [20:15]                                 |          |          |               |          |              |        |      |
| Promoting the Efficiency and Stability of CsPbI <sub>2</sub> Br <sub>2</sub> -Based All-Inorganic Perovskite Solar Cells through a Functional Cu <sup>2+</sup> +Doping Strategy | 2020 | TiO <sub>2</sub> | no | CsPbI <sub>2</sub> Br <sub>2</sub>          | one-step | spin     | no            | DMSO     | Spiro-OMeTAD | no     | 7.81 |
| Promoting the Efficiency and Stability of CsPbI <sub>2</sub> Br <sub>2</sub> -Based All-Inorganic Perovskite Solar Cells through a Functional Cu <sup>2+</sup> +Doping Strategy | 2020 | TiO <sub>2</sub> | no | CsPbI <sub>2</sub> Br <sub>2</sub>          | one-step | spin     | no            | DMSO     | Spiro-OMeTAD | no     | 10.4 |
| Promoting the Efficiency and Stability of CsPbI <sub>2</sub> Br <sub>2</sub> -Based All-Inorganic Perovskite Solar Cells through a Functional Cu <sup>2+</sup> +Doping Strategy | 2020 | TiO <sub>2</sub> | no | CsPbI <sub>2</sub> Br <sub>2</sub>          | one-step | spin     | no            | DMSO     | no           | no     | 4.06 |
| Promoting the Efficiency and Stability of CsPbI <sub>2</sub> Br <sub>2</sub> -Based All-Inorganic Perovskite Solar Cells through a Functional Cu <sup>2+</sup> +Doping Strategy | 2020 | TiO <sub>2</sub> | no | CsPbI <sub>2</sub> Br <sub>2</sub> -0.50%Cu | one-step | spin     | no            | DMSO     | no           | no     | 7.93 |
| Large-grain and smooth cesium doped CH <sub>3</sub> NH <sub>3</sub> PbI <sub>3</sub> perovskite films by cesium iodide post-treatment for improved solar cells                  | 2020 | TiO <sub>2</sub> | no | MAPbI <sub>3</sub>                          | one-step | spin 2-3 | chlorobenzene | DMF+DMSO | Spiro-OMeTAD | Li+TBP | 10.5 |

|                                                                                                                                                                |      |                  |    |                                                                                                          |          |          |               |          |                |               |       |
|----------------------------------------------------------------------------------------------------------------------------------------------------------------|------|------------------|----|----------------------------------------------------------------------------------------------------------|----------|----------|---------------|----------|----------------|---------------|-------|
| Large-grain and smooth cesium doped CH <sub>3</sub> NH <sub>3</sub> PbI <sub>3</sub> perovskite films by cesium iodide post-treatment for improved solar cells | 2020 | TiO <sub>2</sub> | no | MAPbI <sub>3</sub> -CsI                                                                                  | one-step | spin 2-3 | chlorobenzene | DMF+DMSO | Spiro-OMeTAD   | Li+TBP        | 15.3  |
| Analysis of The Efficiency Losses in Hybrid Perovskite/PTAA Solar Cells with Different Molecular Weight: Morphology versus Kinetics.                           | 2020 | TiO <sub>2</sub> | no | (FA <sub>1-x</sub> -yMA <sub>x</sub> Cs <sub>y</sub> )Pb(I <sub>1-x</sub> Br <sub>x</sub> ) <sub>3</sub> | one-step | spin 2-3 | chlorobenzene | DMF+DMSO | PTAA Low-MW    | Li+TBP        | 15.67 |
| Analysis of The Efficiency Losses in Hybrid Perovskite/PTAA Solar Cells with Different Molecular Weight: Morphology versus Kinetics.                           | 2020 | TiO <sub>2</sub> | no | (FA <sub>1-x</sub> -yMA <sub>x</sub> Cs <sub>y</sub> )Pb(I <sub>1-x</sub> Br <sub>x</sub> ) <sub>3</sub> | one-step | spin 2-3 | chlorobenzene | DMF+DMSO | PTAA Medium-MW | Li+TBP        | 16.41 |
| Analysis of The Efficiency Losses in Hybrid Perovskite/PTAA Solar Cells with Different Molecular Weight: Morphology versus Kinetics.                           | 2020 | TiO <sub>2</sub> | no | (FA <sub>1-x</sub> -yMA <sub>x</sub> Cs <sub>y</sub> )Pb(I <sub>1-x</sub> Br <sub>x</sub> ) <sub>3</sub> | one-step | spin 2-3 | chlorobenzene | DMF+DMSO | PTAA High-MW   | Li+TBP        | 18.65 |
| Analysis of The Efficiency Losses in Hybrid Perovskite/PTAA Solar Cells with Different Molecular Weight: Morphology versus Kinetics.                           | 2020 | TiO <sub>2</sub> | no | (FA <sub>1-x</sub> -yMA <sub>x</sub> Cs <sub>y</sub> )Pb(I <sub>1-x</sub> Br <sub>x</sub> ) <sub>3</sub> | one-step | spin 2-3 | chlorobenzene | DMF+DMSO | Spiro-OMeTAD   | Li+TBP+FK 209 | 18.56 |

**Table S2.** Variables represented by “others” for the features in the first-step ML dataset.

| Feature | Variables represented by “others”                                                                                                                                                                                                                                                                                                                                                                                                                 |
|---------|---------------------------------------------------------------------------------------------------------------------------------------------------------------------------------------------------------------------------------------------------------------------------------------------------------------------------------------------------------------------------------------------------------------------------------------------------|
| ETL     | 2D titania, AZO, BaSnO <sub>3</sub> , BCP, Cd <sub>2</sub> SnO <sub>4</sub> , CdS, Cs <sub>2</sub> CO <sub>3</sub> , FPDl, graphene, IBF-Ep, IL, In <sub>2</sub> S <sub>3</sub> , ITIC, Nb <sub>2</sub> O <sub>5</sub> , NDI-graphene, P123-ib, PDI, PEIE, PEIE-LiQ, PFN ITOkismına alsak mı, PFN-2TNDI, PS, PTEBS, TiZn <sub>2</sub> O <sub>4</sub> , WO <sub>x</sub> , Zn <sub>2</sub> SnO <sub>4</sub> , ZnS, α-Fe <sub>2</sub> O <sub>3</sub> |
| ETL-2   | CdS-nanorod, Nb <sub>2</sub> O <sub>5</sub> , PCBA, mZn <sub>2</sub> SnO <sub>4</sub> , mZrO <sub>2</sub> , 2D-graphene, C3-SAM, CdS, ITIC, Msto, m-α-Fe <sub>2</sub> O <sub>3</sub> , PA-SAM, PCBB-2CN-2C8, PEI, PS, Rgs, SAM, ZGO, Au@SiO <sub>2</sub> , mSiO <sub>2</sub>                                                                                                                                                                      |

|                        |                                                                                                                                                                                                                                                                                                                                                                                                                                                                                                                                                                                                                                                                                                                                                                                                                                                                                                                                                                                                                             |
|------------------------|-----------------------------------------------------------------------------------------------------------------------------------------------------------------------------------------------------------------------------------------------------------------------------------------------------------------------------------------------------------------------------------------------------------------------------------------------------------------------------------------------------------------------------------------------------------------------------------------------------------------------------------------------------------------------------------------------------------------------------------------------------------------------------------------------------------------------------------------------------------------------------------------------------------------------------------------------------------------------------------------------------------------------------|
| Deposition method      | PLD, infiltration-dip, electrode position-dip, slot-die, blade-dip, Blowdry, Sprayroll, spin-MAK, MASP, spin-electrospray, dip-spin, Printed, Drip, spin-TSA, spin-OTA, spin-OSA, spin-contact, Dipping, Evap-spin, Spray, Vasp                                                                                                                                                                                                                                                                                                                                                                                                                                                                                                                                                                                                                                                                                                                                                                                             |
| Anti-solvent treatment | IPA, n-hexane, Methoxybenzene, diisopropyl ether, Ethanol, ethylacetate                                                                                                                                                                                                                                                                                                                                                                                                                                                                                                                                                                                                                                                                                                                                                                                                                                                                                                                                                     |
| Precursor solution     | NEP, NMP, DMF+PVP, DMF+PEG, DMSO+SnF2, DMF+MACl, DMF+NH4Cl, DMF+HCl, DMF+HI, DMF+IPA, DMF+cyclohexane, DMF+HBr, DMF+H3PO2, DMF+PCBM, DMF+PCBM+PEG, DMF+Li, DMF+HI+HBr, DMF+graphene, DMF+MCN, DMF+CuPc(tBu)4, DMF+PDM Surea, DMF+Al, DMF+PAA, DMF+PEI, DMF+PEG, DMF+BAI, DMF+NH4I, DMF+NH4SCN, DMF+CNT, DMF+s-CNT, DMF+HAc, DMF+thiourea, DMF+H3P, DMF+4MSA, DMF+TBP, DMF+BMIml, DMF+DMSO+SnF2, DMF+DMSO+SnF2+pyrazine, DMF+DMSO+thiourea, DMF+DMSO+Lil, DMF+DMSO+2-pyridylthiourea, DMF+DMSO+NMP, DMF+DMSO+PVP, DMF+DMSO+KI, DMSO+GBL+CN, DMSO+GBL+HaHc, GBL+NMP, DMSO+SnF2                                                                                                                                                                                                                                                                                                                                                                                                                                                |
| HTL                    | 2TPA-2-DP, ACR-TPA, C5PcH2, carbon+MAI, CBP, Chl-1, Chl-2, Co3O4, CoPcNO2-Oph, copolymerP, Cu2O, CuI, CuInS2, CuInS2/ZnS, CuMePc, CuPc, CuPcNO2-Oph, PF8-TAA, PFB, PFO, Ph-TPM, PIF8-TAA, PNBA, POZ2, POZ3, PTB-BO, PTB-DCB21, PTZ1, PTZ2, PTZDPP-2, CZTS-QD, CZTSe-QD, DEH, DEPT-SC, DHPT-SC, DOPT-SC, DPA-TPM, DPIE, DPIO, DR3TBDTT, DR3TBDTT- PDMS, EH44, FA-CN, FDT, Fused-F, GO, H1no1, Triazine-Th-OMeTPA, TSHBC, TTF-1, V1no39, V885, V886, V911, V928, V931, V946, V957, V9no8, X51, Z25, HBZ-7no, HTM1, HTM2, JY5, KR122, KR131, KR133, KR145, KTM3, Me-BPZTPA, Me-QTPA, MEH-PPV, mNiO, NiOx, OMeTPA-FA, OMeTPA-TPA, P3DDT, Q222, RGO-1, RGO-2, RGO-3, Rno1, SGT-411, SGT-41no, SGT-4no9, SP-no1, SP-no1-Co, SP-no2, SWNT-GO, SYN1, Q221, P3DT, P3OT, PARA1, PBDTT-FTTE, Pbs QDs, PCBM, PCBTDPP, PCDTBT, PCDTBT-PCPDTBT, PCPDTBT, PDI, PDPP3T, PDPPDBTE, PDTSTTz, PDTSTTz-4, Py-C, ZrO2, TFB, TiS2, TPA-CN, TPA-TPM, TPADPP-1, TPADPP-2, TPD, Triazine-Ph-OMeTPA, T1no1, T1no2, T1no3, Z26, ZnPcNO2-Oph, SWNT-PMMA |
| HTL additive           | BuPylm-TFSI, CuI, CuSCN, D-TBP, DIO, EH44-ox+TBP, F4TCNQ, graphene, H+TBP, H-TFSI+Et4N-TFSI, H-TFSI+Et4N-TFSI+Al2O3, Li, Li+D-TBP, spiro(TFSI)2+TBP, TBP, TFSI+TBP, Li+TBP+BPO, Li+TBP+Cu(bpcm), Li+TBP+FK269, Li+TBP+Ir, Li+TBP+MY11                                                                                                                                                                                                                                                                                                                                                                                                                                                                                                                                                                                                                                                                                                                                                                                       |

**Table S3.** The ETL and ETL-2 materials with the top importance based on the RF classification model.  $\alpha$ -Fe<sub>2</sub>O<sub>3</sub> and WO<sub>3</sub> are classified into “others” for ETL while CdS is classified into “others” for ETL-2.

| Material | Conduction band minimum<br>/LUMO<br>/[eV] | Fermi level<br>/[eV] | Band gap<br>/[eV] | Conductivity<br>/[S·cm <sup>-1</sup> ] | Electron mobility<br>/[cm <sup>2</sup> ·V <sup>-1</sup> ·s <sup>-1</sup> ] |
|----------|-------------------------------------------|----------------------|-------------------|----------------------------------------|----------------------------------------------------------------------------|
|----------|-------------------------------------------|----------------------|-------------------|----------------------------------------|----------------------------------------------------------------------------|

|       |                                  |       |        |          |                                                  |                    |
|-------|----------------------------------|-------|--------|----------|--------------------------------------------------|--------------------|
| ETL   | TiO <sub>2</sub>                 | ~-4.2 | ~-4.55 | ~3.2-3.7 | 1.10×10 <sup>-6</sup> -<br>3.00×10 <sup>-4</sup> | 1                  |
|       | SnO <sub>2</sub>                 | ~-4.3 | ~-4.57 | ~3.6-4.1 | 1.76×10 <sup>-6</sup> -<br>1.77×10 <sup>-1</sup> | 250                |
|       | α-Fe <sub>2</sub> O <sub>3</sub> | ~-4.6 | ~-4.85 | ~2.1-2.2 | 2.40×10 <sup>-7</sup> -<br>1.54×10 <sup>-5</sup> | 0.06               |
|       | WO <sub>3</sub>                  | ~-4.2 | ~-5.02 | ~3.2-3.4 | 1.20×10 <sup>-2</sup> -<br>3.40×10 <sup>-2</sup> | ~10 - 20           |
|       | ZnO                              | ~-4.1 | ~-4.39 | ~3.2-3.4 | /                                                | 200                |
|       | PCBM                             | ~-4.0 | ~-5.04 | ~2.3     | 3.2×10 <sup>-4</sup>                             | 2×10 <sup>-3</sup> |
|       | C60                              | ~-4.5 | ~-4.64 | ~1.7     | 2.3×10 <sup>-3</sup>                             | 1.6                |
| ETL-2 | TiO <sub>2</sub>                 | ~-4.2 | ~-4.55 | ~3.2-3.7 | 1.10×10 <sup>-6</sup> -<br>3.00×10 <sup>-4</sup> | 1                  |
|       | CdS                              | ~-3.8 | ~-4.1  | ~2.4     | /                                                | 5                  |
|       | PCBM                             | ~-4.0 | ~-5.04 | ~2.3     | 3.2×10 <sup>-4</sup>                             | 2×10 <sup>-3</sup> |
|       | C60                              | ~-4.5 | ~-4.64 | ~1.7     | 2.3×10 <sup>-3</sup>                             | 1.6                |
|       | ZnO                              | ~-4.1 | ~-4.39 | ~3.2-3.4 | /                                                | 200                |

**Table S4.** Second-step ML dataset containing doped-TiO<sub>2</sub>-based PSCs. The meaning of the features is atomic number (AN), ionic radius (IR/[pm]), ionic charge (IC), ionization energy (IE/[kJ·mol<sup>-1</sup>]), electron affinity (EA/[kJ·mol<sup>-1</sup>]), electronegativity (Pauling scales), electron numbers of s, p, d, f orbits and sum of s and p orbital radii (SP orbit/[pm]) which represent the properties of the

doping element. What's more features represent the optical and electrical properties of ETL after doping like and Fermi level (eV), CBM (eV), bandgap (eV) and conductivity ( $S \cdot cm^{-1}$ ) were also selected. Features in the following Table have the same meaning.

| Doping Element | AN | DA  | CT       | Gap  | CBM   | Fermi | IR    | EN   | SP orbital | S orbital | P orbital | D orbital | F orbital | IE     | EA    | IC | EIR    |
|----------------|----|-----|----------|------|-------|-------|-------|------|------------|-----------|-----------|-----------|-----------|--------|-------|----|--------|
| Nb             | 41 | 1   | 4.89E-06 | 3.02 | -4.23 | -4.41 | 62    | 1.6  | 181.9      | 9         | 18        | 14        | 0         | 652.13 | 86.1  | 5  | 1.0601 |
| Nb             | 41 | 3   | 1.45E-05 | 2.70 | -4.22 | -4.20 | 62    | 1.6  | 181.9      | 9         | 18        | 14        | 0         | 652.13 | 86.1  | 5  | 0.9581 |
| Nd             | 60 | 0.3 | 3.04E-05 | 2.60 | -4.22 | -4.34 | 112.3 | 1.14 | 221.8      | 12        | 24        | 20        | 4         | 533.08 | 60    | 3  | 1.0462 |
| Nb             | 41 | 0.5 | 3.82E-05 | 3.26 | -4.16 | -4.11 | 62    | 1.6  | 181.9      | 9         | 18        | 14        | 0         | 652.13 | 86.1  | 5  | 1.0984 |
| Nb             | 41 | 1   | 9.23E-06 | 3.25 | -4.18 | -4.26 | 62    | 1.6  | 181.9      | 9         | 18        | 14        | 0         | 652.13 | 86.1  | 5  | 1.0574 |
| Nb             | 41 | 5   | 1.19E-05 | 3.17 | -4.23 | -4.15 | 62    | 1.6  | 181.9      | 9         | 18        | 14        | 0         | 652.13 | 86.1  | 5  | 0.7213 |
| Ta             | 73 | 1   | 5.50E-06 | 3.45 | -4.12 | -4.25 | 78    | 1.5  | 170.9      | 12        | 24        | 23        | 14        | 728.42 | 31    | 5  | 0.9949 |
| Ta             | 73 | 3   | 5.36E-06 | 3.35 | -4.13 | -4.39 | 78    | 1.5  | 170.9      | 12        | 24        | 23        | 14        | 728.42 | 31    | 5  | 1.0549 |
| Ta             | 73 | 5   | 4.98E-06 | 3.33 | -4.14 | -4.45 | 78    | 1.5  | 170.9      | 12        | 24        | 23        | 14        | 728.42 | 31    | 5  | 1.0732 |
| Ru             | 44 | 0.5 | 4.82E-05 | 3.65 | -4.06 | -4.61 | 82    | 2.2  | 164.7      | 9         | 18        | 17        | 0         | 710.18 | 101.3 | 3  | 1.0539 |
| Ru             | 44 | 1   | 7.60E-05 | 3.65 | -3.97 | -5.45 | 82    | 2.2  | 164.7      | 9         | 18        | 17        | 0         | 710.18 | 101.3 | 3  | 1.2374 |
| Ru             | 44 | 2   | 1.70E-05 | 3.63 | -4.09 | -4.66 | 82    | 2.2  | 164.7      | 9         | 18        | 17        | 0         | 710.18 | 101.3 | 3  | 0.8732 |
| Ru             | 44 | 5   | 3.65E-05 | 3.62 | -4.09 | -4.58 | 82    | 2.2  | 164.7      | 9         | 18        | 17        | 0         | 710.18 | 101.3 | 3  | 0.5772 |
| Mg             | 12 | 0.1 | 3.52E-05 | 3.44 | -4.10 | -3.48 | 71    | 1.31 | 136.9      | 6         | 6         | 0         | 0         | 737.75 | 0     | 2  | 1.3406 |
| K              | 19 | 0.1 | 2.95E-05 | 2.98 | -4.20 | -3.76 | 151   | 0.82 | 230        | 7         | 12        | 0         | 0         | 418.81 | 48.3  | 1  | 1.0802 |
| K              | 19 | 0.2 | 3.03E-05 | 2.99 | -4.18 | -3.82 | 151   | 0.82 | 230        | 7         | 12        | 0         | 0         | 418.81 | 48.3  | 1  | 1.1283 |
| K              | 19 | 0.5 | 3.28E-05 | 3.43 | -4.12 | -3.01 | 151   | 0.82 | 230        | 7         | 12        | 0         | 0         | 418.81 | 48.3  | 1  | 0.9786 |
| Co             | 27 | 0.3 | 4.04E-05 | 3.63 | -4.00 | -5.32 | 72    | 1.88 | 131.9      | 8         | 12        | 7         | 0         | 760.4  | 63.7  | 2  | 1.3873 |
| Co             | 27 | 1   | 1.28E-05 | 2.38 | -4.20 | -4.57 | 72    | 1.88 | 131.9      | 8         | 12        | 7         | 0         | 760.4  | 63.7  | 2  | 1.0922 |
| Co             | 27 | 2   | 1.30E-05 | 2.77 | -4.21 | -4.49 | 72    | 1.88 | 131.9      | 8         | 12        | 7         | 0         | 760.4  | 63.7  | 2  | 1.0526 |

|    |    |      |          |      |       |       |       |      |       |    |    |    |    |         |       |    |        |
|----|----|------|----------|------|-------|-------|-------|------|-------|----|----|----|----|---------|-------|----|--------|
| Ag | 47 | 1    | 5.00E-10 | 3.83 | -2.33 | -5.07 | 114   | 1.93 | 153.2 | 9  | 18 | 20 | 0  | 731     | 125.6 | 1  | 1.1379 |
| Zn | 30 | 1    | 5.50E-06 | 3.73 | -4.05 | -5.26 | 74    | 1.65 | 120   | 8  | 12 | 10 | 0  | 906.4   | 0     | 2  | 1.0442 |
| Zn | 30 | 3    | 1.57E-05 | 3.72 | -4.02 | -5.50 | 74    | 1.65 | 120   | 8  | 12 | 10 | 0  | 906.4   | 0     | 2  | 1.1239 |
| Zn | 30 | 5    | 8.34E-05 | 3.58 | -4.05 | -5.17 | 74    | 1.65 | 120   | 8  | 12 | 10 | 0  | 906.4   | 0     | 2  | 1.2389 |
| Zn | 30 | 7    | 2.20E-05 | 3.26 | -4.19 | -4.29 | 74    | 1.65 | 120   | 8  | 12 | 10 | 0  | 906.4   | 0     | 2  | 0.9823 |
| Sn | 50 | 3.5  | 2.18E-05 | 3.20 | -4.13 | -4.60 | 69    | 1.96 | 253.4 | 10 | 20 | 20 | 0  | 708.58  | 107.3 | 4  | 1.2932 |
| Pt | 78 | 0.76 | 5.96E-06 | 3.35 | -3.99 | -4.66 | 74    | 2.28 | 159.1 | 11 | 24 | 29 | 14 | 864.4   | 205.3 | 2  | 1.1331 |
| Sm | 62 | 0.3  | 3.13E-05 | 3.33 | -4.10 | -4.31 | 109.8 | 1.17 | 216.4 | 12 | 24 | 20 | 6  | 544.54  | 50    | 3  | 1.1046 |
| B  | 5  | 2.18 | 1.81E-05 | 3.78 | -4.06 | -5.08 | 25    | 2.04 | 164.6 | 4  | 1  | 0  | 0  | 800.64  | 26.7  | 3  | 1.091  |
| Co | 27 | 5    | 3.95E-06 | 3.11 | -4.17 | -4.60 | 72    | 1.88 | 131.9 | 8  | 12 | 7  | 0  | 760.4   | 63.7  | 2  | 1.0969 |
| Li | 3  | 1.25 | 1.23E-05 | 3.12 | -4.16 | -3.39 | 73    | 0.98 | 164.1 | 3  | 0  | 0  | 0  | 520.22  | 59.6  | 1  | 1.1669 |
| Nb | 41 | 1    | 4.30E-06 | 2.92 | -4.18 | -4.52 | 62    | 1.6  | 181.9 | 9  | 18 | 14 | 0  | 652.13  | 86.1  | 5  | 1.17   |
| Nb | 41 | 3    | 1.12E-05 | 2.83 | -4.18 | -4.67 | 62    | 1.6  | 181.9 | 9  | 18 | 14 | 0  | 652.13  | 86.1  | 5  | 1.2574 |
| Nb | 41 | 5    | 1.24E-05 | 2.90 | -4.21 | -4.46 | 62    | 1.6  | 181.9 | 9  | 18 | 14 | 0  | 652.13  | 86.1  | 5  | 1.1    |
| Mg | 12 | 5    | 5.10E-05 | 3.36 | -4.08 | -3.54 | 71    | 1.31 | 136.9 | 6  | 6  | 0  | 0  | 737.75  | 0     | 2  | 1.2118 |
| Mg | 12 | 10   | 1.84E-05 | 3.44 | -4.10 | -5.29 | 71    | 1.31 | 136.9 | 6  | 6  | 0  | 0  | 737.75  | 0     | 2  | 1.3406 |
| Cs | 55 | 4.77 | 2.89E-05 | 3.31 | -4.16 | -4.54 | 181   | 0.79 | 282.4 | 11 | 24 | 20 | 0  | 375.7   | 45.5  | 1  | 1.6379 |
| Mg | 12 | 5    | 3.55E-06 | 3.36 | -4.12 | -2.93 | 71    | 1.31 | 136.9 | 6  | 6  | 0  | 0  | 737.75  | 0     | 2  | 1.0346 |
| Mg | 12 | 10   | 2.64E-06 | 3.44 | -4.07 | -3.45 | 71    | 1.31 | 136.9 | 6  | 6  | 0  | 0  | 737.75  | 0     | 2  | 1.1089 |
| F  | 9  | 1    | 4.47E-06 | 3.52 | -4.09 | -2.42 | 117   | 3.98 | 78.7  | 4  | 5  | 0  | 0  | 1681.05 | 328   | -1 | 1.0128 |
| F  | 9  | 3    | 5.45E-06 | 3.15 | -4.12 | -3.22 | 117   | 3.98 | 78.7  | 4  | 5  | 0  | 0  | 1681.05 | 328   | -1 | 1.1136 |
| F  | 9  | 5    | 6.03E-06 | 3.14 | -4.13 | -3.22 | 117   | 3.98 | 78.7  | 4  | 5  | 0  | 0  | 1681.05 | 328   | -1 | 1.115  |
| F  | 9  | 10   | 6.24E-06 | 3.40 | -4.16 | -2.28 | 117   | 3.98 | 78.7  | 4  | 5  | 0  | 0  | 1681.05 | 328   | -1 | 0.8858 |
| Sn | 50 | 5    | 6.21E-06 | 3.45 | -3.91 | -3.64 | 69    | 1.96 | 253.4 | 10 | 20 | 20 | 0  | 708.58  | 107.3 | 4  | 1.176  |
| Er | 68 | 0.68 | 2.61E-05 | 3.37 | -4.00 | -4.19 | 103   | 1.24 | 203.1 | 12 | 24 | 20 | 12 | 589.3   | 50    | 3  | 1.1293 |
| Ni | 28 | 1    | 3.04E-06 | 3.46 | -3.96 | -3.97 | 69    | 1.91 | 127.6 | 8  | 12 | 8  | 0  | 737.14  | 112   | 2  | 1.1037 |

|    |    |     |          |      |       |       |     |      |       |    |    |    |    |        |       |   |        |
|----|----|-----|----------|------|-------|-------|-----|------|-------|----|----|----|----|--------|-------|---|--------|
| Nb | 41 | 1   | 1.30E-05 | 3.22 | -4.14 | -4.14 | 62  | 1.6  | 181.9 | 9  | 18 | 14 | 0  | 652.13 | 86.1  | 5 | 1.022  |
| Nb | 41 | 5   | 1.27E-05 | 3.21 | -4.23 | -4.23 | 62  | 1.6  | 181.9 | 9  | 18 | 14 | 0  | 652.13 | 86.1  | 5 | 1.0934 |
| Nb | 41 | 10  | 1.58E-05 | 3.18 | -4.23 | -4.23 | 62  | 1.6  | 181.9 | 9  | 18 | 14 | 0  | 652.13 | 86.1  | 5 | 0.9341 |
| Nb | 41 | 20  | 1.65E-05 | 3.09 | -4.40 | -4.40 | 62  | 1.6  | 181.9 | 9  | 18 | 14 | 0  | 652.13 | 86.1  | 5 | 0.7802 |
| Mg | 12 | 4   | 3.74E-08 | 3.49 | -4.07 | -3.59 | 71  | 1.31 | 136.9 | 6  | 6  | 0  | 0  | 737.75 | 0     | 2 | 1.1761 |
| Mg | 12 | 5.5 | 2.85E-08 | 3.45 | -4.08 | -3.41 | 71  | 1.31 | 136.9 | 6  | 6  | 0  | 0  | 737.75 | 0     | 2 | 1.1051 |
| Sn | 50 | 1   | 1.78E-09 | 3.67 | -3.84 | -6.34 | 69  | 1.96 | 253.4 | 10 | 20 | 20 | 0  | 708.58 | 107.3 | 4 | 1.2743 |
| Ag | 47 | 1   | 3.65E-09 | 3.29 | -4.07 | -4.71 | 114 | 1.93 | 153.2 | 9  | 18 | 20 | 0  | 731    | 125.6 | 1 | 1.1875 |
| Zn | 30 | 1   | 3.65E-09 | 3.24 | -4.10 | -4.87 | 74  | 1.65 | 120   | 8  | 12 | 10 | 0  | 906.4  | 0     | 2 | 1.2589 |
| Al | 13 | 0.5 | 7.23E-05 | 3.12 | -4.51 | 2.46  | 53  | 1.61 | 253.2 | 6  | 7  | 0  | 0  | 577.54 | 42.5  | 3 | 1.2228 |
| Mg | 12 | 0.5 | 4.04E-05 | 3.22 | -4.36 | 2.41  | 71  | 1.31 | 136.9 | 6  | 6  | 0  | 0  | 737.75 | 0     | 2 | 1.0653 |
| Er | 68 | 3   | 1.07E-05 | 3.07 | -4.16 | -4.51 | 103 | 1.24 | 203.1 | 12 | 24 | 20 | 12 | 589.3  | 50    | 3 | 1.165  |
| Ag | 47 | 0.1 | 3.92E-05 | 3.71 | -4.08 | -4.86 | 114 | 1.93 | 153.2 | 9  | 18 | 20 | 0  | 731    | 125.6 | 1 | 1.0531 |
| Ag | 47 | 0.5 | 8.93E-05 | 3.71 | -4.08 | -4.65 | 114 | 1.93 | 153.2 | 9  | 18 | 20 | 0  | 731    | 125.6 | 1 | 1.0619 |
| Ag | 47 | 1   | 3.00E-04 | 3.72 | -4.00 | -5.55 | 114 | 1.93 | 153.2 | 9  | 18 | 20 | 0  | 731    | 125.6 | 1 | 1.2212 |
| Ag | 47 | 3   | 5.98E-05 | 3.72 | -4.11 | -4.69 | 114 | 1.93 | 153.2 | 9  | 18 | 20 | 0  | 731    | 125.6 | 1 | 0.354  |
| Cd | 48 | 5   | 3.31E-05 | 3.03 | -4.19 | -4.60 | 92  | 1.69 | 136.8 | 10 | 18 | 20 | 0  | 867.77 | 0     | 2 | 1.29   |
| Ga | 31 | 3   | 1.10E-06 | 3.59 | -4.09 | -4.99 | 61  | 1.81 | 245.8 | 8  | 13 | 10 | 0  | 578.84 | 28.9  | 3 | 1.0875 |
| Ga | 31 | 5   | 1.60E-06 | 3.51 | -4.08 | -4.74 | 61  | 1.81 | 245.8 | 8  | 13 | 10 | 0  | 578.84 | 28.9  | 3 | 1.1055 |
| Ga | 31 | 7   | 2.05E-06 | 3.28 | -4.09 | -4.75 | 61  | 1.81 | 245.8 | 8  | 13 | 10 | 0  | 578.84 | 28.9  | 3 | 1.1668 |
| Ga | 31 | 9   | 8.50E-07 | 3.52 | -4.10 | -4.70 | 61  | 1.81 | 245.8 | 8  | 13 | 10 | 0  | 578.84 | 28.9  | 3 | 1.07   |
| Li | 3  | 0.3 | 3.45E-05 | 3.10 | -4.10 | -2.89 | 73  | 0.98 | 164.1 | 3  | 0  | 0  | 0  | 520.22 | 59.6  | 1 | 1.0885 |
| Zn | 30 | 1   | 3.36E-05 | 3.71 | -4.10 | -6.00 | 74  | 1.65 | 120   | 8  | 12 | 10 | 0  | 906.4  | 0     | 2 | 1.0769 |
| Zn | 30 | 3   | 4.24E-05 | 3.71 | -4.05 | -5.97 | 74  | 1.65 | 120   | 8  | 12 | 10 | 0  | 906.4  | 0     | 2 | 1.1692 |
| Zn | 30 | 5   | 9.34E-06 | 3.68 | -3.92 | -5.90 | 74  | 1.65 | 120   | 8  | 12 | 10 | 0  | 906.4  | 0     | 2 | 1.2923 |
| Zn | 30 | 7   | 2.30E-05 | 3.65 | -3.80 | -5.84 | 74  | 1.65 | 120   | 8  | 12 | 10 | 0  | 906.4  | 0     | 2 | 1.1846 |

|    |    |      |          |      |       |       |     |      |       |    |    |    |    |         |       |    |        |
|----|----|------|----------|------|-------|-------|-----|------|-------|----|----|----|----|---------|-------|----|--------|
| Nb | 41 | 6    | 1.43E-04 | 3.77 | -3.82 | -4.79 | 62  | 1.6  | 181.9 | 9  | 18 | 14 | 0  | 652.13  | 86.1  | 5  | 1.6404 |
| Ce | 58 | 2    | 1.09E-05 | 3.20 | -4.14 | -4.38 | 115 | 1.12 | 216.9 | 12 | 24 | 21 | 1  | 534.39  | 50    | 3  | 1.1149 |
| Al | 13 | 1    | 5.49E-05 | 3.00 | -4.60 | -4.90 | 53  | 1.61 | 253.2 | 6  | 7  | 0  | 0  | 577.54  | 42.5  | 3  | 1.2234 |
| Er | 68 | 0.5  | 3.57E-05 | 3.21 | -4.12 | -4.18 | 103 | 1.24 | 203.1 | 12 | 24 | 20 | 12 | 589.3   | 50    | 3  | 1.1274 |
| Ru | 44 | 0.1  | 2.96E-05 | 3.51 | -4.11 | -3.93 | 82  | 2.2  | 164.7 | 9  | 18 | 17 | 0  | 710.18  | 101.3 | 3  | 1.03   |
| Ru | 44 | 0.05 | 3.23E-05 | 3.53 | -4.05 | -4.57 | 82  | 2.2  | 164.7 | 9  | 18 | 17 | 0  | 710.18  | 101.3 | 3  | 1.1356 |
| Ru | 44 | 0.2  | 3.06E-05 | 3.48 | -4.10 | -4.04 | 82  | 2.2  | 164.7 | 9  | 18 | 17 | 0  | 710.18  | 101.3 | 3  | 1.0123 |
| Ru | 44 | 0.3  | 2.87E-05 | 3.41 | -4.15 | -4.04 | 82  | 2.2  | 164.7 | 9  | 18 | 17 | 0  | 710.18  | 101.3 | 3  | 0.946  |
| Ce | 58 | 0.3  | 5.46E-05 | 3.58 | -4.18 | -4.12 | 115 | 1.12 | 216.9 | 12 | 24 | 21 | 1  | 534.39  | 50    | 3  | 1.0756 |
| Ta | 73 | 0.05 | 2.11E-05 | 3.04 | -4.22 | -4.47 | 78  | 1.5  | 170.9 | 12 | 24 | 23 | 14 | 728.42  | 31    | 5  | 1.0424 |
| Ta | 73 | 0.1  | 2.34E-05 | 2.97 | -4.24 | -4.50 | 78  | 1.5  | 170.9 | 12 | 24 | 23 | 14 | 728.42  | 31    | 5  | 1.1016 |
| Ta | 73 | 0.15 | 3.00E-05 | 3.05 | -4.21 | -4.45 | 78  | 1.5  | 170.9 | 12 | 24 | 23 | 14 | 728.42  | 31    | 5  | 1.0735 |
| Ta | 73 | 0.2  | 4.33E-05 | 3.11 | -4.20 | -4.42 | 78  | 1.5  | 170.9 | 12 | 24 | 23 | 14 | 728.42  | 31    | 5  | 1.0395 |
| Li | 3  | 0.3  | 3.31E-05 | 3.07 | -4.10 | -2.89 | 73  | 0.98 | 164.1 | 3  | 0  | 0  | 0  | 520.22  | 59.6  | 1  | 1.0885 |
| Ru | 44 | 1    | 1.17E-05 | 3.15 | -3.80 | -3.72 | 82  | 2.2  | 164.7 | 9  | 18 | 17 | 0  | 710.18  | 101.3 | 3  | 1.17   |
| Nb | 41 | 6    | 1.82E-05 | 3.79 | -3.82 | -3.82 | 62  | 1.6  | 181.9 | 9  | 18 | 14 | 0  | 652.13  | 86.1  | 5  | 0.9934 |
| Ta | 73 | 1    | 1.64E-06 | 3.58 | -4.38 | -3.80 | 78  | 1.5  | 170.9 | 12 | 24 | 23 | 14 | 728.42  | 31    | 5  | 0.9816 |
| Ta | 73 | 3    | 3.29E-06 | 3.55 | -4.40 | -5.04 | 78  | 1.5  | 170.9 | 12 | 24 | 23 | 14 | 728.42  | 31    | 5  | 1.3926 |
| Ta | 73 | 5    | 2.68E-06 | 3.47 | -4.41 | -3.70 | 78  | 1.5  | 170.9 | 12 | 24 | 23 | 14 | 728.42  | 31    | 5  | 0.9202 |
| Cl | 17 | 0.4  | 3.90E-06 | 3.76 | -4.07 | -3.97 | 167 | 3.16 | 144.4 | 6  | 11 | 0  | 0  | 1251.19 | 349   | -1 | 1.0417 |
| Ru | 44 | 1.5  | 2.06E-05 | 3.49 | -3.96 | -3.14 | 82  | 2.2  | 164.7 | 9  | 18 | 17 | 0  | 710.18  | 101.3 | 3  | 1.3604 |
| Zn | 30 | 1    | 1.29E-05 | 3.07 | -4.13 | -4.52 | 74  | 1.65 | 120   | 8  | 12 | 10 | 0  | 906.4   | 0     | 2  | 1.0742 |
| Zn | 30 | 2.5  | 1.31E-05 | 3.08 | -4.10 | -4.56 | 74  | 1.65 | 120   | 8  | 12 | 10 | 0  | 906.4   | 0     | 2  | 1.0909 |
| Zn | 30 | 5    | 1.58E-05 | 3.04 | -4.09 | -4.37 | 74  | 1.65 | 120   | 8  | 12 | 10 | 0  | 906.4   | 0     | 2  | 0.8907 |



**Table S5.** Second-step ML dataset containing doped-SnO<sub>2</sub>-based PSCs.

| Doping Element | AN | DA    | CT       | Gap  | CBM   | Fermi | IR | EN   | SP orbital | S orbital | P orbital | D orbital | F orbital | IE     | EA   | IC | EIR |
|----------------|----|-------|----------|------|-------|-------|----|------|------------|-----------|-----------|-----------|-----------|--------|------|----|-----|
| Li             | 3  | 0.000 | 4.14E-05 | 3.95 | -4.22 | -4.70 | 73 | 0.98 | 164.1      | 3         | 0         | 0         | 0         | 520.22 | 59.6 | 1  | 1   |

|    |    |       |          |      |       |       |       |      |       |    |    |    |   |        |      |   |       |
|----|----|-------|----------|------|-------|-------|-------|------|-------|----|----|----|---|--------|------|---|-------|
| Li | 3  | 0.017 | 9.10E-05 | 3.95 | -4.35 | -4.85 | 73    | 0.98 | 164.1 | 3  | 0  | 0  | 0 | 520.22 | 59.6 | 1 | 1.163 |
| Mo | 42 | 0.000 | 3.62E-06 | 3.89 | -4.25 | -4.74 | 55    | 2.16 | 175.3 | 9  | 18 | 15 | 0 | 684.32 | 71.9 | 6 | 1     |
| Mo | 42 | 0.010 | 4.89E-06 | 3.89 | -4.25 | -4.54 | 55    | 2.16 | 175.3 | 9  | 18 | 15 | 0 | 684.32 | 71.9 | 6 | 1.242 |
| Y  | 39 | 0.000 | 7.50E-06 | 3.65 | -4.42 | -5.19 | 104   | 1.22 | 189.1 | 10 | 18 | 11 | 0 | 599.87 | 20.6 | 3 | 1     |
| Y  | 39 | 0.030 | 1.05E-05 | 3.70 | -4.29 | -5.11 | 104   | 1.22 | 189.1 | 10 | 18 | 11 | 0 | 599.87 | 20.6 | 3 | 1.319 |
| Zn | 30 | 0.000 | 2.44E-06 | 3.86 | -4.28 | -4.16 | 74    | 1.65 | 120   | 8  | 12 | 10 | 0 | 906.4  | 0    | 2 | 1     |
| Zn | 30 | 0.029 | 3.26E-06 | 3.86 | -4.19 | -4.12 | 74    | 1.65 | 120   | 8  | 12 | 10 | 0 | 906.4  | 0    | 2 | 1.161 |
| Y  | 39 | 0.000 | 1.12E-02 | 3.65 | -4.45 | -5.25 | 104   | 1.22 | 189.1 | 10 | 18 | 11 | 0 | 599.87 | 20.6 | 3 | 1     |
| Y  | 39 | 0.018 | 6.60E-04 | 3.70 | -4.26 | -5.19 | 104   | 1.22 | 189.1 | 10 | 18 | 11 | 0 | 599.87 | 20.6 | 3 | 1.145 |
| Zr | 40 | 0.000 | 6.70E-06 | 4.04 | -4.15 | -4.29 | 73    | 1.33 | 178.5 | 10 | 18 | 12 | 0 | 640.1  | 41.1 | 4 | 1     |
| Zr | 40 | 0.030 | 8.90E-06 | 4.07 | -4.02 | -4.18 | 73    | 1.33 | 178.5 | 10 | 18 | 12 | 0 | 640.1  | 41.1 | 4 | 1.106 |
| Nb | 41 | 0.000 | 5.89E-05 | 3.94 | -4.18 | -4.35 | 62    | 1.6  | 181.9 | 9  | 18 | 14 | 0 | 652.13 | 86.1 | 5 | 1     |
| Nb | 41 | 0.003 | 1.68E-04 | 3.95 | -4.16 | -4.33 | 62    | 1.6  | 181.9 | 9  | 18 | 14 | 0 | 652.13 | 86.1 | 5 | 1.065 |
| Nb | 41 | 0.005 | 2.14E-05 | 3.95 | -4.17 | -4.37 | 62    | 1.6  | 181.9 | 9  | 18 | 14 | 0 | 652.13 | 86.1 | 5 | 1.161 |
| Nb | 41 | 0.008 | 2.50E-04 | 3.95 | -4.15 | -4.29 | 62    | 1.6  | 181.9 | 9  | 18 | 14 | 0 | 652.13 | 86.1 | 5 | 1.075 |
| Nb | 41 | 0.010 | 2.78E-04 | 3.95 | -4.15 | -4.28 | 62    | 1.6  | 181.9 | 9  | 18 | 14 | 0 | 652.13 | 86.1 | 5 | 1.04  |
| Mg | 12 | 0.000 | 1.77E-01 | 3.95 | -4.31 | -5.33 | 71    | 1.31 | 136.9 | 6  | 6  | 0  | 0 | 737.75 | 0    | 2 | 1     |
| Mg | 12 | 0.025 | 1.30E-02 | 3.76 | -4.98 | -5.45 | 71    | 1.31 | 136.9 | 6  | 6  | 0  | 0 | 737.75 | 0    | 2 | 1.518 |
| Mg | 12 | 0.050 | 1.79E-02 | 3.72 | -4.73 | -5.46 | 71    | 1.31 | 136.9 | 6  | 6  | 0  | 0 | 737.75 | 0    | 2 | 1.667 |
| Mg | 12 | 0.075 | 1.06E-02 | 3.70 | -4.88 | -5.47 | 71    | 1.31 | 136.9 | 6  | 6  | 0  | 0 | 737.75 | 0    | 2 | 1.887 |
| Mg | 12 | 0.100 | 1.04E-02 | 3.93 | -4.85 | -5.49 | 71    | 1.31 | 136.9 | 6  | 6  | 0  | 0 | 737.75 | 0    | 2 | 1.446 |
| Mg | 12 | 0.200 | 9.83E-03 | 3.95 | -4.90 | -5.50 | 71    | 1.31 | 136.9 | 6  | 6  | 0  | 0 | 737.75 | 0    | 2 | 1.381 |
| La | 57 | 0.000 | 1.49E-03 | 4.04 | -4.09 | -4.33 | 117.2 | 1.1  | 220.1 | 12 | 24 | 21 | 0 | 538.09 | 48   | 3 | 1     |
| La | 57 | 0.025 | 2.60E-03 | 4.05 | -4.02 | -4.31 | 117.2 | 1.1  | 220.1 | 12 | 24 | 21 | 0 | 538.09 | 48   | 3 | 1.199 |
| La | 57 | 0.050 | 2.61E-03 | 4.07 | -3.94 | -4.25 | 117.2 | 1.1  | 220.1 | 12 | 24 | 21 | 0 | 538.09 | 48   | 3 | 1.119 |
| Li | 3  | 0.000 | 1.25E-03 | 4.20 | -4.20 | -4.50 | 73    | 0.98 | 164.1 | 3  | 0  | 0  | 0 | 520.22 | 59.6 | 1 | 1     |

|    |    |       |          |      |       |       |       |      |       |    |    |    |    |         |       |    |       |
|----|----|-------|----------|------|-------|-------|-------|------|-------|----|----|----|----|---------|-------|----|-------|
| Li | 3  | 0.020 | 1.82E-03 | 4.19 | -4.19 | -4.49 | 73    | 0.98 | 164.1 | 3  | 0  | 0  | 0  | 520.22  | 59.6  | 1  | 1.004 |
| Mg | 12 | 0.020 | 1.92E-03 | 4.17 | -4.14 | -4.98 | 71    | 1.31 | 136.9 | 6  | 6  | 0  | 0  | 737.75  | 0     | 2  | 1.087 |
| Sb | 51 | 0.020 | 1.70E-03 | 4.16 | -4.04 | -4.33 | 90    | 2.05 | 233.1 | 10 | 21 | 20 | 0  | 830.58  | 103.2 | 3  | 1.103 |
| Sc | 21 | 0.030 | 2.36E-05 | 3.95 | -4.19 | -5.03 | 88.5  | 1.36 | 171.6 | 8  | 12 | 1  | 0  | 633.09  | 18.1  | 3  | 1.164 |
| Y  | 39 | 0.030 | 2.76E-05 | 3.95 | -4.13 | -5.01 | 104   | 1.22 | 189.1 | 10 | 18 | 11 | 0  | 599.87  | 20.6  | 3  | 1.199 |
| La | 57 | 0.030 | 2.26E-05 | 3.96 | -4.25 | -5.09 | 117.2 | 1.1  | 220.1 | 12 | 24 | 21 | 0  | 538.09  | 48    | 3  | 1.132 |
| Ta | 73 | 0.000 | 7.25E-03 | 3.70 | -4.34 | -4.60 | 78    | 1.5  | 170.9 | 12 | 24 | 23 | 14 | 728.42  | 31    | 5  | 1     |
| Ta | 73 | 0.051 | 6.54E-03 | 3.70 | -4.52 | -4.56 | 78    | 1.5  | 170.9 | 12 | 24 | 23 | 14 | 728.42  | 31    | 5  | 1.113 |
| Nd | 60 | 0.000 | 6.22E-03 | 4.00 | -4.40 | -4.64 | 112.3 | 1.14 | 221.8 | 12 | 24 | 20 | 4  | 533.08  | 60    | 3  | 1     |
| Nd | 60 | 0.050 | 8.99E-04 | 4.00 | -4.14 | -4.37 | 112.3 | 1.14 | 221.8 | 12 | 24 | 20 | 4  | 533.08  | 60    | 3  | 1.094 |
| Nb | 41 | 0.000 | 4.31E-03 | 4.11 | -4.04 | -4.03 | 62    | 1.6  | 181.9 | 9  | 18 | 14 | 0  | 652.13  | 86.1  | 5  | 1     |
| Nb | 41 | 0.010 | 1.96E-03 | 4.08 | -4.07 | -4.17 | 62    | 1.6  | 181.9 | 9  | 18 | 14 | 0  | 652.13  | 86.1  | 5  | 1.053 |
| Nb | 41 | 0.020 | 1.95E-03 | 4.02 | -4.13 | -4.08 | 62    | 1.6  | 181.9 | 9  | 18 | 14 | 0  | 652.13  | 86.1  | 5  | 1.098 |
| Nb | 41 | 0.040 | 3.77E-03 | 4.00 | -4.15 | -3.93 | 62    | 1.6  | 181.9 | 9  | 18 | 14 | 0  | 652.13  | 86.1  | 5  | 1.022 |
| Nb | 41 | 0.080 | 3.90E-03 | 3.93 | -4.22 | -4.02 | 62    | 1.6  | 181.9 | 9  | 18 | 14 | 0  | 652.13  | 86.1  | 5  | 0.995 |
| F  | 9  | 0.000 | 3.73E-04 | 3.87 | -4.41 | -4.61 | 117   | 3.98 | 78.7  | 4  | 5  | 0  | 0  | 1681.05 | 328   | -1 | 1     |
| F  | 9  | 0.100 | 5.34E-04 | 3.89 | -4.33 | -4.55 | 117   | 3.98 | 78.7  | 4  | 5  | 0  | 0  | 1681.05 | 328   | -1 | 1.033 |
| F  | 9  | 0.150 | 1.27E-03 | 3.91 | -4.27 | -4.48 | 117   | 3.98 | 78.7  | 4  | 5  | 0  | 0  | 1681.05 | 328   | -1 | 1.068 |
| F  | 9  | 0.200 | 3.72E-03 | 3.92 | -4.15 | -4.41 | 117   | 3.98 | 78.7  | 4  | 5  | 0  | 0  | 1681.05 | 328   | -1 | 1.114 |
| F  | 9  | 0.300 | 6.37E-04 | 3.91 | -4.30 | -4.53 | 117   | 3.98 | 78.7  | 4  | 5  | 0  | 0  | 1681.05 | 328   | -1 | 0.995 |
| F  | 9  | 0.500 | 2.65E-04 | 3.89 | -4.27 | -4.48 | 117   | 3.98 | 78.7  | 4  | 5  | 0  | 0  | 1681.05 | 328   | -1 | 0.908 |
| F  | 9  | 0.700 | 1.12E-04 | 3.89 | -4.27 | -4.55 | 117   | 3.98 | 78.7  | 4  | 5  | 0  | 0  | 1681.05 | 328   | -1 | 0.822 |
| F  | 9  | 1.000 | 7.35E-05 | 3.89 | -4.27 | -4.55 | 117   | 3.98 | 78.7  | 4  | 5  | 0  | 0  | 1681.05 | 328   | -1 | 0.775 |
| Al | 13 | 0.000 | 9.49E-03 | 3.60 | -4.40 | -4.59 | 53    | 1.61 | 253.2 | 6  | 7  | 0  | 0  | 577.54  | 42.5  | 3  | 1     |
| Al | 13 | 0.050 | 2.21E-03 | 3.60 | -4.40 | -4.60 | 53    | 1.61 | 253.2 | 6  | 7  | 0  | 0  | 577.54  | 42.5  | 3  | 1.341 |
| Ta | 73 | 0.000 | 2.40E-03 | 3.92 | -4.20 | -4.36 | 78    | 1.5  | 170.9 | 12 | 24 | 23 | 14 | 728.42  | 31    | 5  | 1     |

|    |    |       |          |      |       |       |       |      |       |    |    |    |    |         |       |    |       |
|----|----|-------|----------|------|-------|-------|-------|------|-------|----|----|----|----|---------|-------|----|-------|
| Ta | 73 | 0.010 | 4.72E-03 | 3.96 | -4.19 | -4.34 | 78    | 1.5  | 170.9 | 12 | 24 | 23 | 14 | 728.42  | 31    | 5  | 1.068 |
| Ta | 73 | 0.005 | 2.24E-03 | 3.93 | -4.19 | -4.35 | 78    | 1.5  | 170.9 | 12 | 24 | 23 | 14 | 728.42  | 31    | 5  | 1.018 |
| Ta | 73 | 0.020 | 2.66E-03 | 3.95 | -4.17 | -4.33 | 78    | 1.5  | 170.9 | 12 | 24 | 23 | 14 | 728.42  | 31    | 5  | 1.024 |
| In | 49 | 0.000 | 1.14E-03 | 3.91 | -4.07 | -4.39 | 76    | 1.78 | 281.8 | 10 | 19 | 20 | 0  | 558.3   | 28.9  | 3  | 1     |
| In | 49 | 0.050 | 9.56E-03 | 3.87 | -4.24 | -4.52 | 76    | 1.78 | 281.8 | 10 | 19 | 20 | 0  | 558.3   | 28.9  | 3  | 1.09  |
| Sb | 51 | 0.000 | 1.77E-05 | 3.76 | -4.43 | -4.72 | 90    | 2.05 | 233.1 | 10 | 21 | 20 | 0  | 830.58  | 103.2 | 3  | 1     |
| Sb | 51 | 0.050 | 2.64E-05 | 3.78 | -4.54 | -4.66 | 90    | 2.05 | 233.1 | 10 | 21 | 20 | 0  | 830.58  | 103.2 | 3  | 1.052 |
| Mg | 12 | 0.000 | 4.71E-02 | 3.71 | -4.23 | -4.97 | 71    | 1.31 | 136.9 | 6  | 6  | 0  | 0  | 737.75  | 0     | 2  | 1     |
| Mg | 12 | 0.050 | 1.95E-02 | 3.97 | -4.89 | -5.54 | 71    | 1.31 | 136.9 | 6  | 6  | 0  | 0  | 737.75  | 0     | 2  | 1.149 |
| Li | 3  | 0.000 | 2.54E-03 | 4.07 | -4.22 | -4.47 | 73    | 0.98 | 164.1 | 3  | 0  | 0  | 0  | 520.22  | 59.6  | 1  | 1     |
| Li | 3  | 0.319 | 4.93E-03 | 4.04 | -4.35 | -4.67 | 73    | 0.98 | 164.1 | 3  | 0  | 0  | 0  | 520.22  | 59.6  | 1  | 1.629 |
| Ru | 44 | 0.000 | 1.40E-05 | 3.72 | -4.30 | -5.35 | 82    | 2.2  | 164.7 | 9  | 18 | 17 | 0  | 710.18  | 101.3 | 3  | 1     |
| Ru | 44 | 0.020 | 2.70E-05 | 3.71 | -4.03 | -5.18 | 82    | 2.2  | 164.7 | 9  | 18 | 17 | 0  | 710.18  | 101.3 | 3  | 1.089 |
| Bi | 83 | 0.000 | 1.19E-02 | 3.48 | -4.33 | -4.10 | 117   | 2.02 | 250.5 | 12 | 27 | 30 | 14 | 72.95   | 91.2  | 3  | 1     |
| Bi | 83 | 0.055 | 5.04E-03 | 3.48 | -4.14 | -4.06 | 117   | 2.02 | 250.5 | 12 | 27 | 30 | 14 | 72.95   | 91.2  | 3  | 1.081 |
| Al | 13 | 0.010 | 3.10E-04 | 3.92 | -3.91 | -4.16 | 53    | 1.61 | 253.2 | 6  | 7  | 0  | 0  | 577.54  | 42.5  | 3  | 1.085 |
| La | 57 | 0.010 | 2.67E-03 | 3.89 | -3.92 | -4.18 | 117.2 | 1.1  | 220.1 | 12 | 24 | 21 | 0  | 538.09  | 48    | 3  | 1.082 |
| K  | 19 | 0.000 | 6.27E-04 | 3.70 | -4.05 | -4.14 | 151   | 0.82 | 230   | 7  | 12 | 0  | 0  | 418.81  | 48.3  | 1  | 1     |
| K  | 19 | 0.060 | 7.95E-04 | 3.70 | -4.19 | -4.23 | 151   | 0.82 | 230   | 7  | 12 | 0  | 0  | 418.81  | 48.3  | 1  | 1.099 |
| Li | 3  | 0.000 | 1.76E-06 | 4.00 | -4.24 | -4.64 | 73    | 0.98 | 164.1 | 3  | 0  | 0  | 0  | 520.22  | 59.6  | 1  | 1     |
| Li | 3  | 0.001 | 1.37E-05 | 4.01 | -4.21 | -4.65 | 73    | 0.98 | 164.1 | 3  | 0  | 0  | 0  | 520.22  | 59.6  | 1  | 1.066 |
| F  | 9  | 0.000 | 6.10E-04 | 3.83 | -4.30 | -4.48 | 117   | 3.98 | 78.7  | 4  | 5  | 0  | 0  | 1681.05 | 328   | -1 | 1     |
| F  | 9  | 0.111 | 1.02E-03 | 3.86 | -4.20 | -4.24 | 117   | 3.98 | 78.7  | 4  | 5  | 0  | 0  | 1681.05 | 328   | -1 | 1.053 |
| Zn | 30 | 0.000 | 7.60E-06 | 4.51 | -4.06 | -5.57 | 74    | 1.65 | 120   | 8  | 12 | 10 | 0  | 906.4   | 0     | 2  | 1     |
| Zn | 30 | 0.030 | 1.05E-05 | 4.44 | -3.85 | -5.44 | 74    | 1.65 | 120   | 8  | 12 | 10 | 0  | 906.4   | 0     | 2  | 1.064 |
| C  | 6  | 0.000 | 2.35E-04 | 4.01 | -3.94 | -4.25 | 29    | 2.55 | 129   | 4  | 2  | 0  | 0  | 1086.45 | 153.9 | 4  | 1     |

|    |    |       |          |      |       |       |       |      |       |    |    |    |   |         |       |   |       |
|----|----|-------|----------|------|-------|-------|-------|------|-------|----|----|----|---|---------|-------|---|-------|
| C  | 6  | 0.004 | 5.01E-04 | 4.01 | -4.00 | -4.04 | 29    | 2.55 | 129   | 4  | 2  | 0  | 0 | 1086.45 | 153.9 | 4 | 1.497 |
| K  | 19 | 0.000 | 1.82E-04 | 4.05 | -3.23 | -3.90 | 151   | 0.82 | 230   | 7  | 12 | 0  | 0 | 418.81  | 48.3  | 1 | 1     |
| K  | 19 | 0.054 | 4.48E-04 | 3.95 | -3.34 | -3.59 | 151   | 0.82 | 230   | 7  | 12 | 0  | 0 | 418.81  | 48.3  | 1 | 1.149 |
| Rb | 37 | 0.000 | 3.01E-06 | 3.78 | -3.70 | -3.90 | 166   | 0.82 | 249   | 9  | 18 | 10 | 0 | 403.3   | 46.9  | 1 | 1     |
| Rb | 37 | 0.035 | 4.26E-06 | 3.80 | -3.75 | -3.90 | 166   | 0.82 | 249   | 9  | 18 | 10 | 0 | 403.3   | 46.9  | 1 | 1.054 |
| P  | 15 | 0.000 | 2.65E-03 | 3.90 | -4.19 | -4.27 | 31    | 2.19 | 181.5 | 6  | 9  | 0  | 0 | 1011.81 | 72    | 5 | 1     |
| P  | 15 | 0.074 | 6.20E-04 | 3.88 | -4.18 | -4.25 | 31    | 2.19 | 181.5 | 6  | 9  | 0  | 0 | 1011.81 | 72    | 5 | 1.069 |
| S  | 16 | 0.000 | 1.30E-02 | 3.97 | -4.40 | -4.48 | 26    | 2.58 | 160.6 | 6  | 10 | 0  | 0 | 999.59  | 200   | 6 | 1     |
| S  | 16 | 0.011 | 1.07E-02 | 3.97 | -4.32 | -4.35 | 26    | 2.58 | 160.6 | 6  | 10 | 0  | 0 | 999.59  | 200   | 6 | 1.073 |
| Sm | 62 | 0.000 | 5.03E-03 | 3.68 | -4.37 | -4.46 | 109.8 | 1.17 | 216.4 | 12 | 24 | 20 | 6 | 544.54  | 50    | 3 | 1     |
| Mg | 12 | 0.000 | 3.36E-02 | 3.77 | -4.31 | -5.00 | 71    | 1.31 | 136.9 | 6  | 6  | 0  | 0 | 737.75  | 0     | 2 | 1     |

**Table S6.** Physical and chemical properties of doping elements.

| Dopant | AN | IR    | EN   | SP orbit | S orbit | P orbit | D orbit | F orbit | IE      | EA    | IC |
|--------|----|-------|------|----------|---------|---------|---------|---------|---------|-------|----|
| Cs     | 55 | 181   | 0.79 | 282.4    | 11      | 24      | 20      | 0       | 375.7   | 45.5  | 1  |
| Cl     | 17 | 167   | 3.16 | 144.4    | 6       | 11      | 0       | 0       | 1251.19 | 349   | -1 |
| Rb     | 37 | 166   | 0.82 | 249      | 9       | 18      | 10      | 0       | 403.3   | 46.9  | 1  |
| K      | 19 | 151   | 0.82 | 230      | 7       | 12      | 0       | 0       | 418.81  | 48.3  | 1  |
| La     | 57 | 117.2 | 1.1  | 220.1    | 12      | 24      | 21      | 0       | 538.09  | 48    | 3  |
| Bi     | 83 | 117   | 2.02 | 250.5    | 12      | 27      | 30      | 14      | 72.95   | 91.2  | 3  |
| F      | 9  | 117   | 3.98 | 78.7     | 4       | 5       | 0       | 0       | 1681.05 | 328   | -1 |
| Ce     | 58 | 115   | 1.12 | 216.9    | 12      | 24      | 21      | 1       | 534.39  | 50    | 3  |
| Ag     | 47 | 114   | 1.93 | 153.2    | 9       | 18      | 20      | 0       | 731.00  | 125.6 | 1  |
| Nd     | 60 | 112.3 | 1.14 | 221.8    | 12      | 24      | 20      | 4       | 533.08  | 60    | 3  |
| Sm     | 62 | 109.8 | 1.17 | 216.4    | 12      | 24      | 20      | 6       | 544.54  | 50    | 3  |
| Y      | 39 | 104   | 1.22 | 189.1    | 10      | 18      | 11      | 0       | 599.87  | 20.6  | 3  |
| Er     | 68 | 103   | 1.24 | 203.1    | 12      | 24      | 20      | 12      | 589.3   | 50    | 3  |
| Cd     | 48 | 92    | 1.69 | 136.8    | 10      | 18      | 20      | 0       | 867.77  | 0     | 2  |
| Sb     | 51 | 90    | 2.05 | 233.1    | 10      | 21      | 20      | 0       | 830.58  | 103.2 | 3  |
| Sc     | 21 | 88.5  | 1.36 | 171.6    | 8       | 12      | 1       | 0       | 633.09  | 18.1  | 3  |
| Ru     | 44 | 82    | 2.2  | 164.7    | 9       | 18      | 17      | 0       | 710.18  | 101.3 | 3  |
| Ta     | 73 | 78    | 1.5  | 170.9    | 12      | 24      | 23      | 14      | 728.42  | 31    | 5  |
| Fe     | 26 | 77    | 1.83 | 136.6    | 8       | 12      | 6       | 0       | 762.47  | 15.7  | 2  |
| In     | 49 | 76    | 1.78 | 281.8    | 10      | 19      | 20      | 0       | 558.3   | 28.9  | 3  |
| Zn     | 30 | 74    | 1.65 | 120      | 8       | 12      | 10      | 0       | 906.40  | 0     | 2  |
| Pt     | 78 | 74    | 2.28 | 159.1    | 11      | 24      | 29      | 14      | 864.4   | 205.3 | 2  |
| Li     | 3  | 73    | 0.98 | 164.1    | 3       | 0       | 0       | 0       | 520.22  | 59.6  | 1  |
| Zr     | 40 | 73    | 1.33 | 178.5    | 10      | 18      | 12      | 0       | 640.1   | 41.1  | 4  |
| Co     | 27 | 72    | 1.88 | 131.9    | 8       | 12      | 7       | 0       | 760.4   | 63.7  | 2  |
| Mg     | 12 | 71    | 1.31 | 136.9    | 6       | 6       | 0       | 0       | 737.75  | 0     | 2  |
| Ni     | 28 | 69    | 1.91 | 127.6    | 8       | 12      | 8       | 0       | 737.14  | 112   | 2  |
| Sn     | 50 | 69    | 1.96 | 253.4    | 10      | 20      | 20      | 0       | 708.58  | 107.3 | 4  |
| Nb     | 41 | 62    | 1.6  | 181.9    | 9       | 18      | 14      | 0       | 652.13  | 86.1  | 5  |
| Ga     | 31 | 61    | 1.81 | 245.8    | 8       | 13      | 10      | 0       | 578.84  | 28.9  | 3  |
| Ti     | 22 | 56    | 1.54 | 162.2    | 8       | 12      | 2       | 0       | 658.81  | 7.6   | 4  |
| Mo     | 42 | 55    | 2.16 | 175.3    | 9       | 18      | 15      | 0       | 684.32  | 71.9  | 6  |
| Al     | 13 | 53    | 1.61 | 253.2    | 6       | 7       | 0       | 0       | 577.54  | 42.5  | 3  |
| P      | 15 | 31    | 2.19 | 181.5    | 6       | 9       | 0       | 0       | 1011.81 | 72    | 5  |
| C      | 6  | 29    | 2.55 | 129      | 4       | 2       | 0       | 0       | 1086.45 | 153.9 | 4  |
| N      | 7  | 27    | 3.04 | 106.2    | 4       | 3       | 0       | 0       | 1402.33 | 7     | 5  |
| S      | 16 | 26    | 2.58 | 160.6    | 6       | 10      | 0       | 0       | 999.59  | 200   | 6  |
| B      | 5  | 25    | 2.04 | 164.6    | 4       | 1       | 0       | 0       | 800.64  | 26.7  | 3  |

Following is the code of the classification in the first-step ML:

```
from sklearn.tree import DecisionTreeClassifier
from sklearn.tree import ExtraTreeClassifier
from sklearn.ensemble import RandomForestClassifier
from sklearn.ensemble import AdaBoostClassifier
from sklearn.ensemble import GradientBoostingClassifier
from sklearn.metrics import accuracy_score
from xgboost.sklearn import XGBClassifier
from sklearn.model_selection import train_test_split
from sklearn.neural_network import MLPClassifier
from sklearn.multiclass import OneVsRestClassifier
from sklearn import svm
import matplotlib.pyplot as plt
import pandas as pd
import numpy as np

features = pd.read_excel('xxx.xlsx')# “xxx” is the file of your dataset
features = pd.get_dummies(features)
features.to_excel('one-hot-data.xlsx')
labels = np.array(features['label'])
features = features.drop('label', axis=1)
classes = ['0', '1', '2']# Class A, Class B, Class C

x_train, x_test, y_train, y_test = train_test_split(features, labels, test_size=0.20, random_state=42)
models = [DecisionTreeClassifier(), ExtraTreeClassifier(), RandomForestClassifier(),
          AdaBoostClassifier(),
          GradientBoostingClassifier(), XGBClassifier(), MLPClassifier(),
          OneVsRestClassifier(svm.SVC())]

#
# models_str = ['DecisionTree', 'ExtraTree', 'RandomForest', 'AdaBoost',
#               'GradientBoost', 'XGBoost', 'MLPClassifier', 'SVM']

Tree = ['DecisionTree', 'ExtraTree', 'RandomForest', 'AdaBoost', 'GradientBoost', 'XGBoost']
linear_neural = ['MLPClassifier', 'SVM']
result = pd.DataFrame(columns=('model', 'dataset', 'accuracy', 'accuracy(%)'))
ETL = ['ETL_BCP', 'ETL_C60', 'ETL_PCBM', 'ETL_PEDOT:PSS', 'ETL_SnO2', 'ETL_TiO2',
'ETL_ZnO', 'ETL_no', 'ETL_others',
      'ETL-2_Al2O3', 'ETL-2_C60', 'ETL-2_PCBM', 'ETL-2_TiO2', 'ETL-2_ZnO', 'ETL-2_no',
'ETL-2_others']
```

```

model_jude = pd.DataFrame()
classifiers = [
    ['DecisionTree', DecisionTreeClassifier(random_state=42, max_depth=15)],
    ['ExtraTree', ExtraTreeClassifier(random_state=42, max_depth=13)],
    ['RandomForest', RandomForestClassifier(random_state=42, max_depth=14)],
    ['AdaBoost', AdaBoostClassifier(random_state=42)],
    ['GradientBoost', GradientBoostingClassifier(random_state=42, max_depth=13)],
    ['XGBoost', XGBClassifier(random_state=42, max_depth=13)],
    ['MLPClassifier', MLPClassifier(solver='lbfgs', alpha=1e-5,
                                   hidden_layer_sizes=(15, 15),
                                   random_state=42, max_iter=100)],
    ['SVM', OneVsRestClassifier(svm.SVC(kernel='poly', probability=True,
                                   random_state=42))]
]

```

for name, pipeline in classifiers:

```

    model = pipeline.fit(x_train, y_train)
    predictions_train = model.predict(x_train)
    predictions_test = model.predict(x_test)
    accracy_train = round(accuracy_score(y_true=y_train, y_pred=predictions_train),4)
    accracy_test = round(accuracy_score(y_true=y_test, y_pred=predictions_test), 4)
    print(str(name)+"train_Accuracy:", accracy_train)
    print(str(name)+"test_Accuracy:", accracy_test)

```
